# Supplementary material for: Unpredictable cycloisomerization of 1,11-dien-6-ynes by a common cobalt catalyst
Source: Beilstein J Org Chem. 2017 Mar 31;13:639–43. doi: 10.3762/bjoc.13.62 (PMC5389203; doi:10.3762/bjoc.13.62)
Supplement: File 2 — Single crystal data for 1h and 2b. [file Beilstein_J_Org_Chem-13-639-s002.zip]

Archive with 4 entries (4 files):
- 1h.cif
- 2b.cif
- checkcif_1h.pdf
- checkcif_2b.pdf
