# Supplementary material for: Unpredictable cycloisomerization of 1,11-dien-6-ynes by a common cobalt catalyst
Source: Beilstein J Org Chem. 2017 Mar 31;13:639–43. doi: 10.3762/bjoc.13.62 (PMC5389203; doi:10.3762/bjoc.13.62)
Supplement: File 2 — Single crystal data for 1h and 2b. [file Beilstein_J_Org_Chem-13-639-s002.zip › 1h.cif]

 
data_1d
 
_audit_creation_method            SHELXL-2014/6
_chemical_name_systematic         ?
_chemical_name_common             ?
_chemical_melting_point           ?
_chemical_formula_moiety          
 'C28 H36 N2 O4 S2' 
_chemical_formula_sum
 'C28 H36 N2 O4 S2' 
_chemical_formula_weight          528.71

loop_
 _atom_type_symbol
 _atom_type_description
 _atom_type_scat_dispersion_real
 _atom_type_scat_dispersion_imag
 _atom_type_scat_source
 'C'  'C'   0.0033   0.0016
 'International Tables Vol C Tables 4.2.6.8 and 6.1.1.4'
 'H'  'H'   0.0000   0.0000
 'International Tables Vol C Tables 4.2.6.8 and 6.1.1.4'
 'N'  'N'   0.0061   0.0033
 'International Tables Vol C Tables 4.2.6.8 and 6.1.1.4'
 'O'  'O'   0.0106   0.0060
 'International Tables Vol C Tables 4.2.6.8 and 6.1.1.4'
 'S'  'S'   0.1246   0.1234
 'International Tables Vol C Tables 4.2.6.8 and 6.1.1.4'
 
_space_group_crystal_system       triclinic
_space_group_IT_number            2
_space_group_name_H-M_alt         'P -1'
_space_group_name_Hall            '-P 1'
 
_shelx_space_group_comment
;
The symmetry employed for this shelxl refinement is uniquely defined
by the following loop, which should always be used as a source of
symmetry information in preference to the above space-group names.
They are only intended as comments.
;
 
loop_
 _space_group_symop_operation_xyz
 'x, y, z'
 '-x, -y, -z'
 
_cell_length_a                    9.1158(6)
_cell_length_b                    9.4944(7)
_cell_length_c                    9.9154(7)
_cell_angle_alpha                 61.5480(10)
_cell_angle_beta                  71.9710(10)
_cell_angle_gamma                 72.6980(10)
_cell_volume                      705.83(9)
_cell_formula_units_Z             1
_cell_measurement_temperature     120(2)
_cell_measurement_reflns_used     2442
_cell_measurement_theta_min       3
_cell_measurement_theta_max       30
 
_exptl_crystal_description        prism
_exptl_crystal_colour             colorless
_exptl_crystal_density_meas       ?
_exptl_crystal_density_method     ?
_exptl_crystal_density_diffrn     1.244          
_exptl_crystal_F_000              282
_exptl_transmission_factor_min    ?
_exptl_transmission_factor_max    ?
_exptl_crystal_size_max           0.350
_exptl_crystal_size_mid           0.150
_exptl_crystal_size_min           0.150
_exptl_absorpt_coefficient_mu     0.224
_shelx_estimated_absorpt_T_min    0.926
_shelx_estimated_absorpt_T_max    0.967
_exptl_absorpt_correction_type    'multi-scan'   
_exptl_absorpt_correction_T_min   0.3879  
_exptl_absorpt_correction_T_max   0.4330  
_exptl_absorpt_process_details    'APEX2 (Bruker, 2005)' 
_exptl_absorpt_special_details    ?
_diffrn_ambient_temperature       120(2)
_diffrn_radiation_wavelength      0.71073
_diffrn_radiation_type            MoK\a
_diffrn_source                    ?
_diffrn_measurement_device_type   'Bruker SMART APEX2 CCD area detector'
_diffrn_measurement_method        'phi and omega scans'
_diffrn_detector_area_resol_mean  ?
_diffrn_reflns_number             8566
_diffrn_reflns_av_unetI/netI      0.0358
_diffrn_reflns_av_R_equivalents   0.0244
_diffrn_reflns_limit_h_min        -12
_diffrn_reflns_limit_h_max        12
_diffrn_reflns_limit_k_min        -12
_diffrn_reflns_limit_k_max        12
_diffrn_reflns_limit_l_min        -13
_diffrn_reflns_limit_l_max        13
_diffrn_reflns_theta_min          2.384
_diffrn_reflns_theta_max          28.996
_diffrn_reflns_theta_full         25.242
_diffrn_measured_fraction_theta_max   0.999
_diffrn_measured_fraction_theta_full  1.000
_diffrn_reflns_Laue_measured_fraction_max    0.999
_diffrn_reflns_Laue_measured_fraction_full   1.000
_diffrn_reflns_point_group_measured_fraction_max   0.999
_diffrn_reflns_point_group_measured_fraction_full  1.000
_reflns_number_total              3755
_reflns_number_gt                 3283
_reflns_threshold_expression      'I > 2\s(I)'
_reflns_Friedel_coverage          0.000
_reflns_Friedel_fraction_max      .
_reflns_Friedel_fraction_full     .
 
_reflns_special_details
;
 Reflections were merged by SHELXL according to the crystal
 class for the calculation of statistics and refinement.
 
 _reflns_Friedel_fraction is defined as the number of unique
 Friedel pairs measured divided by the number that would be
 possible theoretically, ignoring centric projections and
 systematic absences.
;
 
_computing_data_collection        'APEX2 (Bruker, 2005)' 
_computing_cell_refinement        'APEX2 (Bruker, 2005)' 
_computing_data_reduction         'APEX2 (Bruker, 2005)' 
_computing_structure_solution     'SHELXL-2014/6 (Sheldrick, 2014)'
_computing_structure_refinement   'SHELXL-2014/6 (Sheldrick, 2014)'
_computing_molecular_graphics     'SHELXL-2014/6 (Sheldrick, 2014)'
_computing_publication_material   'SHELXL-2014/6 (Sheldrick, 2014)'
_refine_special_details           ?
_refine_ls_structure_factor_coef  Fsqd
_refine_ls_matrix_type            full
_refine_ls_weighting_scheme       calc
_refine_ls_weighting_details
'w=1/[\s^2^(Fo^2^)+(0.0495P)^2^+0.4736P] where P=(Fo^2^+2Fc^2^)/3'
_atom_sites_solution_primary      ?
_atom_sites_solution_secondary    ?
_atom_sites_solution_hydrogens    geom
_refine_ls_hydrogen_treatment     constr
_refine_ls_extinction_method      none
_refine_ls_extinction_coef        .
_refine_ls_number_reflns          3755
_refine_ls_number_parameters      166
_refine_ls_number_restraints      0
_refine_ls_R_factor_all           0.0529
_refine_ls_R_factor_gt            0.0439
_refine_ls_wR_factor_ref          0.1102
_refine_ls_wR_factor_gt           0.1036
_refine_ls_goodness_of_fit_ref    1.003
_refine_ls_restrained_S_all       1.003
_refine_ls_shift/su_max           0.001
_refine_ls_shift/su_mean          0.000
 
loop_
 _atom_site_label
 _atom_site_type_symbol
 _atom_site_fract_x
 _atom_site_fract_y
 _atom_site_fract_z
 _atom_site_U_iso_or_equiv
 _atom_site_adp_type
 _atom_site_occupancy
 _atom_site_site_symmetry_order  
 _atom_site_calc_flag
 _atom_site_refinement_flags_posn
 _atom_site_refinement_flags_adp
 _atom_site_refinement_flags_occupancy
 _atom_site_disorder_assembly
 _atom_site_disorder_group
S1 S 0.65170(4) 0.78585(5) 0.32763(4) 0.01756(11) Uani 1 1 d . . . . .
O1 O 0.49733(13) 0.87577(14) 0.35695(14) 0.0244(3) Uani 1 1 d . . . . .
O2 O 0.70042(15) 0.74537(15) 0.19617(13) 0.0267(3) Uani 1 1 d . . . . .
N1 N 0.66298(15) 0.61232(15) 0.48473(15) 0.0180(3) Uani 1 1 d . . . . .
C1 C 0.9416(2) 0.4925(2) 0.49109(19) 0.0248(3) Uani 1 1 d . . . . .
C2 C 0.7925(2) 0.4794(2) 0.4722(2) 0.0243(3) Uani 1 1 d . . . . .
H2A H 0.8081 0.4800 0.3686 0.029 Uiso 1 1 calc R U . . .
H2B H 0.7629 0.3740 0.5533 0.029 Uiso 1 1 calc R U . . .
C3 C 0.78754(18) 0.89618(18) 0.30939(17) 0.0172(3) Uani 1 1 d . . . . .
C4 C 0.93585(19) 0.8834(2) 0.21590(19) 0.0244(3) Uani 1 1 d . . . . .
H4A H 0.9648 0.8134 0.1647 0.029 Uiso 1 1 calc R U . . .
C5 C 1.0410(2) 0.9736(2) 0.1980(2) 0.0298(4) Uani 1 1 d . . . . .
H5A H 1.1425 0.9642 0.1347 0.036 Uiso 1 1 calc R U . . .
C6 C 1.0008(2) 1.0776(2) 0.2710(2) 0.0283(4) Uani 1 1 d . . . . .
C7 C 0.8530(2) 1.0862(2) 0.3666(2) 0.0272(4) Uani 1 1 d . . . . .
H7A H 0.8248 1.1545 0.4195 0.033 Uiso 1 1 calc R U . . .
C8 C 0.74598(19) 0.99663(19) 0.38617(19) 0.0218(3) Uani 1 1 d . . . . .
H8A H 0.6454 1.0040 0.4514 0.026 Uiso 1 1 calc R U . . .
C9 C 1.1145(3) 1.1806(3) 0.2431(3) 0.0458(6) Uani 1 1 d . . . . .
H9A H 1.2161 1.1111 0.2637 0.069 Uiso 1 1 calc R U . . .
H9B H 1.0738 1.2351 0.3134 0.069 Uiso 1 1 calc R U . . .
H9C H 1.1274 1.2625 0.1342 0.069 Uiso 1 1 calc R U . . .
C10 C 0.62381(19) 0.62317(18) 0.63681(17) 0.0188(3) Uani 1 1 d . . . . .
H10A H 0.5397 0.7182 0.6338 0.023 Uiso 1 1 calc R U . . .
H10B H 0.7172 0.6386 0.6556 0.023 Uiso 1 1 calc R U . . .
C11 C 0.57054(18) 0.47078(19) 0.76697(18) 0.0197(3) Uani 1 1 d . . . . .
H11A H 0.4882 0.4380 0.7551 0.024 Uiso 1 1 calc R U . . .
C12 C 0.62679(18) 0.37624(19) 0.89795(18) 0.0205(3) Uani 1 1 d . . . . .
C13 C 0.7579(2) 0.4054(2) 0.9385(2) 0.0269(4) Uani 1 1 d . . . . .
H13A H 0.8239 0.4708 0.8422 0.040 Uiso 1 1 calc R U . . .
H13B H 0.8213 0.3007 0.9942 0.040 Uiso 1 1 calc R U . . .
H13C H 0.7138 0.4636 1.0054 0.040 Uiso 1 1 calc R U . . .
C14 C 0.5544(2) 0.2313(2) 1.0212(2) 0.0294(4) Uani 1 1 d . . . . .
H14A H 0.4701 0.2219 0.9857 0.044 Uiso 1 1 calc R U . . .
H14B H 0.5114 0.2450 1.1187 0.044 Uiso 1 1 calc R U . . .
H14C H 0.6346 0.1323 1.0396 0.044 Uiso 1 1 calc R U . . .
 
loop_
 _atom_site_aniso_label
 _atom_site_aniso_U_11
 _atom_site_aniso_U_22
 _atom_site_aniso_U_33
 _atom_site_aniso_U_23
 _atom_site_aniso_U_13
 _atom_site_aniso_U_12
S1 0.01951(19) 0.01809(18) 0.01434(18) -0.00440(14) -0.00487(13) -0.00514(13)
O1 0.0196(6) 0.0241(6) 0.0243(6) -0.0044(5) -0.0085(4) -0.0026(4)
O2 0.0357(7) 0.0303(6) 0.0186(6) -0.0103(5) -0.0055(5) -0.0122(5)
N1 0.0219(6) 0.0144(6) 0.0150(6) -0.0044(5) -0.0024(5) -0.0041(5)
C1 0.0266(8) 0.0186(7) 0.0199(7) -0.0060(6) -0.0033(6) 0.0034(6)
C2 0.0292(9) 0.0170(7) 0.0237(8) -0.0089(6) -0.0041(6) -0.0007(6)
C3 0.0191(7) 0.0150(6) 0.0146(7) -0.0026(5) -0.0050(5) -0.0040(5)
C4 0.0232(8) 0.0261(8) 0.0217(8) -0.0107(7) 0.0003(6) -0.0057(6)
C5 0.0218(8) 0.0353(10) 0.0264(9) -0.0090(8) 0.0013(7) -0.0103(7)
C6 0.0317(9) 0.0279(9) 0.0232(8) -0.0011(7) -0.0091(7) -0.0155(7)
C7 0.0350(9) 0.0238(8) 0.0266(8) -0.0106(7) -0.0074(7) -0.0093(7)
C8 0.0226(8) 0.0209(7) 0.0207(7) -0.0087(6) -0.0029(6) -0.0037(6)
C9 0.0503(13) 0.0510(13) 0.0403(12) -0.0081(10) -0.0091(10) -0.0343(11)
C10 0.0229(8) 0.0170(7) 0.0148(7) -0.0054(6) -0.0029(6) -0.0046(6)
C11 0.0209(7) 0.0184(7) 0.0178(7) -0.0049(6) -0.0031(6) -0.0064(6)
C12 0.0213(8) 0.0191(7) 0.0174(7) -0.0065(6) -0.0024(6) -0.0021(6)
C13 0.0238(8) 0.0323(9) 0.0235(8) -0.0110(7) -0.0081(6) -0.0015(7)
C14 0.0385(10) 0.0238(8) 0.0177(8) -0.0015(6) -0.0039(7) -0.0086(7)
 
_geom_special_details
;
 All esds (except the esd in the dihedral angle between two l.s. planes)
 are estimated using the full covariance matrix.  The cell esds are taken
 into account individually in the estimation of esds in distances, angles
 and torsion angles; correlations between esds in cell parameters are only
 used when they are defined by crystal symmetry.  An approximate (isotropic)
 treatment of cell esds is used for estimating esds involving l.s. planes.
;
 
loop_
 _geom_bond_atom_site_label_1
 _geom_bond_atom_site_label_2
 _geom_bond_distance
 _geom_bond_site_symmetry_2
 _geom_bond_publ_flag
S1 O2 1.4358(12) . ?
S1 O1 1.4361(12) . ?
S1 N1 1.6445(13) . ?
S1 C3 1.7652(15) . ?
N1 C2 1.474(2) . ?
N1 C10 1.4848(19) . ?
C1 C1 1.189(4) 2_766 ?
C1 C2 1.476(2) . ?
C2 H2A 0.9900 . ?
C2 H2B 0.9900 . ?
C3 C8 1.390(2) . ?
C3 C4 1.391(2) . ?
C4 C5 1.387(2) . ?
C4 H4A 0.9500 . ?
C5 C6 1.390(3) . ?
C5 H5A 0.9500 . ?
C6 C7 1.393(3) . ?
C6 C9 1.509(2) . ?
C7 C8 1.390(2) . ?
C7 H7A 0.9500 . ?
C8 H8A 0.9500 . ?
C9 H9A 0.9800 . ?
C9 H9B 0.9800 . ?
C9 H9C 0.9800 . ?
C10 C11 1.499(2) . ?
C10 H10A 0.9900 . ?
C10 H10B 0.9900 . ?
C11 C12 1.335(2) . ?
C11 H11A 0.9500 . ?
C12 C14 1.504(2) . ?
C12 C13 1.505(2) . ?
C13 H13A 0.9800 . ?
C13 H13B 0.9800 . ?
C13 H13C 0.9800 . ?
C14 H14A 0.9800 . ?
C14 H14B 0.9800 . ?
C14 H14C 0.9800 . ?
 
loop_
 _geom_angle_atom_site_label_1
 _geom_angle_atom_site_label_2
 _geom_angle_atom_site_label_3
 _geom_angle
 _geom_angle_site_symmetry_1
 _geom_angle_site_symmetry_3
 _geom_angle_publ_flag
O2 S1 O1 120.11(7) . . ?
O2 S1 N1 106.49(7) . . ?
O1 S1 N1 105.89(7) . . ?
O2 S1 C3 107.49(7) . . ?
O1 S1 C3 107.52(7) . . ?
N1 S1 C3 108.98(7) . . ?
C2 N1 C10 114.75(12) . . ?
C2 N1 S1 117.41(10) . . ?
C10 N1 S1 116.49(10) . . ?
C1 C1 C2 177.3(2) 2_766 . ?
N1 C2 C1 113.12(14) . . ?
N1 C2 H2A 109.0 . . ?
C1 C2 H2A 109.0 . . ?
N1 C2 H2B 109.0 . . ?
C1 C2 H2B 109.0 . . ?
H2A C2 H2B 107.8 . . ?
C8 C3 C4 120.27(15) . . ?
C8 C3 S1 120.26(12) . . ?
C4 C3 S1 119.46(12) . . ?
C5 C4 C3 119.46(16) . . ?
C5 C4 H4A 120.3 . . ?
C3 C4 H4A 120.3 . . ?
C4 C5 C6 121.26(16) . . ?
C4 C5 H5A 119.4 . . ?
C6 C5 H5A 119.4 . . ?
C5 C6 C7 118.42(16) . . ?
C5 C6 C9 120.17(18) . . ?
C7 C6 C9 121.39(18) . . ?
C8 C7 C6 121.18(16) . . ?
C8 C7 H7A 119.4 . . ?
C6 C7 H7A 119.4 . . ?
C3 C8 C7 119.38(15) . . ?
C3 C8 H8A 120.3 . . ?
C7 C8 H8A 120.3 . . ?
C6 C9 H9A 109.5 . . ?
C6 C9 H9B 109.5 . . ?
H9A C9 H9B 109.5 . . ?
C6 C9 H9C 109.5 . . ?
H9A C9 H9C 109.5 . . ?
H9B C9 H9C 109.5 . . ?
N1 C10 C11 110.08(12) . . ?
N1 C10 H10A 109.6 . . ?
C11 C10 H10A 109.6 . . ?
N1 C10 H10B 109.6 . . ?
C11 C10 H10B 109.6 . . ?
H10A C10 H10B 108.2 . . ?
C12 C11 C10 126.75(15) . . ?
C12 C11 H11A 116.6 . . ?
C10 C11 H11A 116.6 . . ?
C11 C12 C14 120.03(15) . . ?
C11 C12 C13 125.00(15) . . ?
C14 C12 C13 114.93(14) . . ?
C12 C13 H13A 109.5 . . ?
C12 C13 H13B 109.5 . . ?
H13A C13 H13B 109.5 . . ?
C12 C13 H13C 109.5 . . ?
H13A C13 H13C 109.5 . . ?
H13B C13 H13C 109.5 . . ?
C12 C14 H14A 109.5 . . ?
C12 C14 H14B 109.5 . . ?
H14A C14 H14B 109.5 . . ?
C12 C14 H14C 109.5 . . ?
H14A C14 H14C 109.5 . . ?
H14B C14 H14C 109.5 . . ?
 
loop_
 _geom_torsion_atom_site_label_1
 _geom_torsion_atom_site_label_2
 _geom_torsion_atom_site_label_3
 _geom_torsion_atom_site_label_4
 _geom_torsion
 _geom_torsion_site_symmetry_1
 _geom_torsion_site_symmetry_2
 _geom_torsion_site_symmetry_3
 _geom_torsion_site_symmetry_4
 _geom_torsion_publ_flag
O2 S1 N1 C2 35.93(13) . . . . ?
O1 S1 N1 C2 164.84(11) . . . . ?
C3 S1 N1 C2 -79.76(13) . . . . ?
O2 S1 N1 C10 177.68(11) . . . . ?
O1 S1 N1 C10 -53.40(12) . . . . ?
C3 S1 N1 C10 61.99(12) . . . . ?
C10 N1 C2 C1 -60.17(18) . . . . ?
S1 N1 C2 C1 82.23(16) . . . . ?
O2 S1 C3 C8 158.55(12) . . . . ?
O1 S1 C3 C8 27.94(14) . . . . ?
N1 S1 C3 C8 -86.41(13) . . . . ?
O2 S1 C3 C4 -20.62(15) . . . . ?
O1 S1 C3 C4 -151.24(13) . . . . ?
N1 S1 C3 C4 94.42(14) . . . . ?
C8 C3 C4 C5 -1.0(2) . . . . ?
S1 C3 C4 C5 178.18(13) . . . . ?
C3 C4 C5 C6 -0.4(3) . . . . ?
C4 C5 C6 C7 1.7(3) . . . . ?
C4 C5 C6 C9 -176.95(18) . . . . ?
C5 C6 C7 C8 -1.7(3) . . . . ?
C9 C6 C7 C8 177.00(17) . . . . ?
C4 C3 C8 C7 1.1(2) . . . . ?
S1 C3 C8 C7 -178.11(12) . . . . ?
C6 C7 C8 C3 0.3(3) . . . . ?
C2 N1 C10 C11 -62.03(17) . . . . ?
S1 N1 C10 C11 155.21(11) . . . . ?
N1 C10 C11 C12 127.16(17) . . . . ?
C10 C11 C12 C14 176.94(15) . . . . ?
C10 C11 C12 C13 -0.7(3) . . . . ?
 
_refine_diff_density_max    0.253
_refine_diff_density_min   -0.449
_refine_diff_density_rms    0.063

_shelxl_version_number 2014/6

_shelx_res_file
;
TITL a in P-1
CELL 0.71073   9.1158   9.4944   9.9154  61.548  71.971  72.698
ZERR    1.00   0.0006   0.0007   0.0007   0.001   0.001   0.001
LATT  1
SFAC C H N O S
UNIT 28 36 2 4 2
TEMP -153.000
size 0.15 0.15 0.35
L.S. 4
BOND $h
htab
conf
FMAP 2
PLAN 20
omit -4 58
acta
WGHT    0.049500    0.473600
FVAR       0.34796
S1    5    0.651700    0.785848    0.327629    11.00000    0.01951    0.01809 =
         0.01434   -0.00440   -0.00487   -0.00514
O1    4    0.497328    0.875772    0.356951    11.00000    0.01963    0.02408 =
         0.02426   -0.00442   -0.00852   -0.00262
O2    4    0.700422    0.745371    0.196168    11.00000    0.03565    0.03035 =
         0.01858   -0.01028   -0.00549   -0.01216
N1    3    0.662985    0.612316    0.484728    11.00000    0.02194    0.01444 =
         0.01499   -0.00442   -0.00236   -0.00413
C1    1    0.941641    0.492529    0.491088    11.00000    0.02658    0.01860 =
         0.01990   -0.00599   -0.00329    0.00338
C2    1    0.792476    0.479431    0.472205    11.00000    0.02916    0.01701 =
         0.02369   -0.00895   -0.00407   -0.00072
AFIX  23
H2A   2    0.808121    0.479968    0.368618    11.00000   -1.20000
H2B   2    0.762860    0.374043    0.553253    11.00000   -1.20000
AFIX   0
C3    1    0.787536    0.896181    0.309391    11.00000    0.01911    0.01502 =
         0.01463   -0.00263   -0.00498   -0.00402
C4    1    0.935853    0.883389    0.215896    11.00000    0.02321    0.02614 =
         0.02170   -0.01066    0.00027   -0.00566
AFIX  43
H4A   2    0.964837    0.813413    0.164722    11.00000   -1.20000
AFIX   0
C5    1    1.041030    0.973625    0.198017    11.00000    0.02180    0.03528 =
         0.02638   -0.00901    0.00125   -0.01035
AFIX  43
H5A   2    1.142506    0.964217    0.134716    11.00000   -1.20000
AFIX   0
C6    1    1.000797    1.077573    0.270957    11.00000    0.03174    0.02789 =
         0.02317   -0.00110   -0.00911   -0.01552
C7    1    0.852991    1.086163    0.366637    11.00000    0.03503    0.02376 =
         0.02658   -0.01057   -0.00744   -0.00933
AFIX  43
H7A   2    0.824809    1.154453    0.419498    11.00000   -1.20000
AFIX   0
C8    1    0.745982    0.996627    0.386174    11.00000    0.02255    0.02086 =
         0.02066   -0.00873   -0.00293   -0.00374
AFIX  43
H8A   2    0.645354    1.004018    0.451415    11.00000   -1.20000
AFIX   0
C9    1    1.114471    1.180600    0.243135    11.00000    0.05026    0.05099 =
         0.04025   -0.00805   -0.00915   -0.03428
AFIX 137
H9A   2    1.216121    1.111124    0.263660    11.00000   -1.50000
H9B   2    1.073773    1.235075    0.313440    11.00000   -1.50000
H9C   2    1.127368    1.262534    0.134232    11.00000   -1.50000
AFIX   0
C10   1    0.623810    0.623166    0.636805    11.00000    0.02294    0.01701 =
         0.01480   -0.00537   -0.00293   -0.00455
AFIX  23
H10A  2    0.539689    0.718218    0.633754    11.00000   -1.20000
H10B  2    0.717225    0.638600    0.655627    11.00000   -1.20000
AFIX   0
C11   1    0.570535    0.470778    0.766970    11.00000    0.02090    0.01841 =
         0.01777   -0.00490   -0.00307   -0.00643
AFIX  43
H11A  2    0.488201    0.438033    0.755066    11.00000   -1.20000
AFIX   0
C12   1    0.626785    0.376242    0.897952    11.00000    0.02126    0.01906 =
         0.01737   -0.00652   -0.00239   -0.00214
C13   1    0.757874    0.405378    0.938478    11.00000    0.02382    0.03229 =
         0.02348   -0.01096   -0.00814   -0.00146
AFIX 137
H13A  2    0.823855    0.470755    0.842203    11.00000   -1.50000
H13B  2    0.821333    0.300698    0.994217    11.00000   -1.50000
H13C  2    0.713780    0.463649    1.005401    11.00000   -1.50000
AFIX   0
C14   1    0.554428    0.231258    1.021188    11.00000    0.03853    0.02376 =
         0.01768   -0.00155   -0.00387   -0.00860
AFIX 137
H14A  2    0.470132    0.221907    0.985660    11.00000   -1.50000
H14B  2    0.511396    0.245038    1.118663    11.00000   -1.50000
H14C  2    0.634603    0.132348    1.039551    11.00000   -1.50000

AFIX   0
HKLF 4

REM  a in P-1
REM R1 =  0.0439 for    3283 Fo > 4sig(Fo)  and  0.0529 for all    3755 data
REM    166 parameters refined using      0 restraints

END

WGHT      0.0445      0.2674

REM Instructions for potential hydrogen bonds
EQIV $1 -x+1, -y+2, -z+1
HTAB C8 O1_$1
EQIV $2 -x+1, -y+1, -z+1
HTAB C11 O2_$2

REM Highest difference peak  0.253,  deepest hole -0.449,  1-sigma level  0.063
Q1    1   0.6382  0.3951  0.8022  11.00000  0.05    0.25
Q2    1   0.7775  0.9399  0.3550  11.00000  0.05    0.24
Q3    1   0.5801  0.4398  0.8548  11.00000  0.05    0.24
Q4    1   0.8631  0.8888  0.2763  11.00000  0.05    0.23
Q5    1   0.5967  0.3047  0.9544  11.00000  0.05    0.23
Q6    1   0.7330  0.8399  0.3206  11.00000  0.05    0.23
Q7    1   0.6756  0.4104  0.9100  11.00000  0.05    0.23
Q8    1   0.8793  0.4764  0.4741  11.00000  0.05    0.23
Q9    1   0.7313  0.5626  0.4662  11.00000  0.05    0.22
Q10   1   0.9950  0.4494  0.5463  11.00000  0.05    0.22
Q11   1   0.8004  1.0385  0.3707  11.00000  0.05    0.21
Q12   1   0.6739  0.6842  0.4165  11.00000  0.05    0.20
Q13   1   0.5975  0.5398  0.7072  11.00000  0.05    0.20
Q14   1   0.9378  1.0673  0.3301  11.00000  0.05    0.20
Q15   1   0.6465  0.6220  0.5612  11.00000  0.05    0.19
Q16   1   0.5239  0.6985  0.6077  11.00000  0.05    0.19
Q17   1   1.0615  1.2937  0.1887  11.00000  0.05    0.19
Q18   1   0.5623  0.9136  0.6244  11.00000  0.05    0.19
Q19   1   0.5813  0.1218  1.2753  11.00000  0.05    0.19
Q20   1   0.3373  0.7610  0.7383  11.00000  0.05    0.18
;
_shelx_res_checksum   74700

_shelx_hkl_file
;
  -1   0   0   43.64    0.64
  -1   0   0   43.82    0.64
  -1   0   0   43.17    0.77
   1   0   0   40.10    0.76
   1   0   0   42.31    0.78
  -2   0   0    4.31    0.14
  -2   0   0    4.50    0.24
  -2   0   0    4.37    0.14
  -3   0   0   73.36    1.16
  -3   0   0   73.53    1.14
  -3   0   0   73.03    1.52
   3   0   0   70.80    1.54
  -4   0   0    0.25    0.05
  -4   0   0    0.19    0.10
  -4   0   0    0.15    0.06
   4   0   0    0.12    0.12
  -5   0   0    0.42    0.14
  -5   0   0    0.01    0.05
  -5   0   0   -0.05    0.05
   5   0   0    0.04    0.10
  -6   0   0   20.97    0.45
  -6   0   0   21.68    0.96
  -6   0   0   20.33    0.45
   6   0   0   20.97    0.98
  -7   0   0   49.90    1.65
  -8   0   0    2.97    0.51
   8   0   0    2.62    0.54
  -9   0   0    2.48    0.51
   9   0   0    3.36    0.63
 -10   0   0   13.89    1.04
  10   0   0   13.09    1.01
 -11   0   0    1.19    0.30
  11   0   0    0.91    0.49
 -12   0   0    0.32    0.38
  12   0   0    0.12    0.29
  12  -1   0    3.63    0.82
 -12   1   0    4.26    0.89
  11  -1   0    3.31    0.78
 -11   1   0    4.67    0.75
  10  -1   0    0.28    0.29
 -10   1   0    0.10    0.21
   9  -1   0   -0.24    0.20
  -9   1   0   -0.12    0.13
   8  -1   0    5.55    0.76
  -8   1   0    4.53    0.51
   7  -1   0    7.31    0.64
  -7   1   0    6.77    0.58
   6  -1   0   28.87    1.18
  -6   1   0   28.48    0.65
  -6   1   0   28.42    1.13
   5  -1   0   85.14    2.13
  -5   1   0   90.68    1.52
  -5   1   0   89.30    2.07
   4  -1   0  275.87    4.70
  -4   1   0  269.03    4.55
  -4   1   0  278.42    4.05
   3  -1   0    4.69    0.33
  -3   1   0    4.90    0.32
  -3   1   0    4.88    0.22
   2  -1   0    0.22    0.10
  -2   1   0    0.15    0.07
  -2   1   0    0.23    0.08
   1  -1   0  520.28    8.06
  -1   1   0  524.39    7.87
  -1   1   0  536.31    8.04
   0  -1   0   16.85    0.39
   0  -1   0   17.48    0.34
   0   1   0   18.21    0.40
   0   1   0   16.38    0.39
  -1  -1   0    7.29    0.23
  -1  -1   0    7.35    0.27
   1   1   0    7.60    0.22
  -2  -1   0  209.52    3.11
  -2  -1   0  227.55    3.39
   2   1   0  209.82    3.21
   2   1   0  206.78    3.31
  -3  -1   0   21.35    0.72
   3   1   0   22.49    0.71
   3   1   0   22.16    0.48
  -4  -1   0   54.64    1.42
   4   1   0   55.39    1.40
   4   1   0   54.45    0.98
  -5  -1   0   14.55    0.72
   5   1   0   15.72    0.75
  -6  -1   0    1.91    0.35
  -6  -1   0    2.03    0.16
   6   1   0    2.46    0.40
  -7  -1   0    3.84    0.55
   7   1   0    3.40    0.53
  -8  -1   0   42.01    1.63
  -9  -1   0    1.87    0.43
   9   1   0    1.79    0.52
 -10  -1   0    1.06    0.29
  10   1   0    0.11    0.21
 -11  -1   0    0.14    0.22
  11   1   0    0.36    0.43
 -12  -1   0    2.15    0.59
  12   1   0    1.57    0.50
  11  -2   0    5.77    0.89
 -11   2   0    8.17    0.83
  10  -2   0    1.15    0.39
 -10   2   0    1.55    0.41
   9  -2   0    4.40    0.74
  -9   2   0    4.07    0.67
   8  -2   0    6.66    0.70
  -8   2   0    8.41    0.70
   7  -2   0   -0.03    0.20
  -7   2   0    0.31    0.18
   6  -2   0    3.74    0.53
  -6   2   0    2.57    0.41
  -6   2   0    2.56    0.24
   5  -2   0   74.72    1.93
  -5   2   0   70.45    1.82
  -5   2   0   69.71    1.41
   4  -2   0   52.00    1.43
  -4   2   0   50.44    1.38
  -4   2   0   52.28    1.12
   3  -2   0   50.20    1.27
  -3   2   0   48.65    1.24
  -3   2   0   49.45    1.07
   2  -2   0   29.78    0.81
  -2   2   0   29.78    0.82
  -2   2   0   29.86    0.75
   1  -2   0  373.33    5.88
  -1   2   0  370.84    5.72
  -1   2   0  363.99    5.58
   0  -2   0   13.93    0.45
   0  -2   0   13.92    0.36
   0   2   0   14.13    0.46
  -1  -2   0   48.94    0.88
  -1  -2   0   50.07    1.06
   1   2   0   48.81    0.88
   1   2   0   49.69    1.03
   2   2   0    4.15    0.22
   2   2   0    3.98    0.23
  -3  -2   0   17.46    0.68
   3   2   0   16.77    0.50
   3   2   0   17.05    0.59
  -4  -2   0   73.01    1.77
   4   2   0   75.48    1.68
   4   2   0   74.97    1.37
  -5  -2   0   12.08    0.68
   5   2   0   12.49    0.66
   5   2   0   11.79    0.41
  -6  -2   0   83.20    2.19
   6   2   0   83.27    2.12
   6   2   0   82.64    1.51
  -7  -2   0   11.08    0.78
   7   2   0   11.71    0.75
   7   2   0   10.88    0.40
  -8  -2   0    5.13    0.56
   8   2   0    6.39    0.62
  -9  -2   0    5.47    0.79
   9   2   0    5.51    0.81
 -10  -2   0    0.27    0.29
  10   2   0    0.41    0.24
 -11  -2   0    3.20    0.61
  11   2   0    2.26    0.65
 -12  -2   0    1.95    0.39
  12   2   0    1.10    0.38
  11  -3   0    3.28    0.75
 -11   3   0    3.23    0.65
  10  -3   0    0.07    0.22
 -10   3   0   -0.16    0.27
   9  -3   0   12.36    0.99
  -9   3   0   12.04    0.92
   8  -3   0    5.94    0.67
  -8   3   0    6.93    0.66
   7  -3   0    6.98    0.67
  -7   3   0    7.17    0.62
   6  -3   0    2.65    0.50
  -6   3   0    2.14    0.40
  -6   3   0    1.97    0.29
   5  -3   0   23.25    1.02
  -5   3   0   22.99    1.00
  -5   3   0   23.47    0.78
   4  -3   0    5.25    0.44
  -4   3   0    5.37    0.37
  -4   3   0    5.72    0.44
   3  -3   0   31.78    1.00
  -3   3   0   32.50    0.92
  -3   3   0   31.29    1.00
   2  -3   0    4.82    0.32
  -2   3   0    4.58    0.32
  -2   3   0    5.72    0.37
   1  -3   0   77.08    1.47
  -1   3   0   76.44    1.58
  -1   3   0   77.26    1.58
   0  -3   0  108.08    2.03
   0  -3   0  105.42    1.80
   0   3   0  110.54    2.04
  -1  -3   0  110.53    2.12
  -1  -3   0  110.88    1.83
   1   3   0  116.89    2.12
  -2  -3   0   66.90    1.52
   2   3   0   65.59    1.41
  -3  -3   0   38.14    1.14
   3   3   0   37.60    0.94
   3   3   0   37.12    0.96
  -4  -3   0   28.76    1.04
   4   3   0   29.51    0.81
   4   3   0   28.36    0.89
  -5  -3   0    5.14    0.45
   5   3   0    4.88    0.31
   5   3   0    4.69    0.40
  -6  -3   0    5.85    0.55
   6   3   0    6.14    0.34
   6   3   0    6.01    0.52
  -7  -3   0   12.77    0.87
   7   3   0   15.05    0.84
   7   3   0   14.26    0.53
  -8  -3   0    4.97    0.57
   8   3   0    4.87    0.55
  -9  -3   0    0.39    0.20
   9   3   0    0.39    0.30
  10   3   0    1.22    0.34
 -11  -3   0    0.82    0.32
  11   3   0    0.56    0.38
 -12  -3   0   -0.06    0.29
  12   3   0   -0.06    0.39
  10  -4   0    3.38    0.76
 -10   4   0    2.93    0.73
   9  -4   0    0.52    0.35
  -9   4   0    0.64    0.40
   8  -4   0    4.13    0.71
  -8   4   0    4.10    0.68
   7  -4   0    0.52    0.31
  -7   4   0   -0.16    0.16
   6  -4   0    4.68    0.64
  -6   4   0    3.61    0.53
  -6   4   0    4.12    0.39
   5  -4   0   34.02    1.27
  -5   4   0   34.69    1.29
  -5   4   0   33.60    1.08
   4  -4   0   16.70    0.80
  -4   4   0   17.32    0.73
  -4   4   0   16.60    0.81
   3  -4   0    0.38    0.18
  -3   4   0    0.32    0.18
  -3   4   0    0.31    0.13
   2  -4   0    0.08    0.09
  -2   4   0    0.03    0.09
  -2   4   0   -0.05    0.10
   1  -4   0    2.05    0.21
   1  -4   0    2.16    0.26
  -1   4   0    2.08    0.30
   0  -4   0    2.24    0.18
   0  -4   0    2.29    0.26
   0   4   0    2.36    0.26
  -1  -4   0    9.26    0.35
  -1  -4   0    9.42    0.51
   1   4   0    9.13    0.49
  -2  -4   0   10.51    0.39
  -2  -4   0    8.86    0.53
   2   4   0   10.25    0.52
  -3  -4   0   74.00    1.83
   3   4   0   75.74    1.69
   3   4   0   73.50    1.49
  -4  -4   0   49.70    1.51
   4   4   0   48.64    1.26
   4   4   0   49.54    1.25
  -5  -4   0   77.74    2.09
   5   4   0   78.75    1.73
   5   4   0   77.87    1.83
  -6  -4   0    1.06    0.29
   6   4   0    1.04    0.25
   6   4   0    1.22    0.23
  -7  -4   0   17.50    1.04
   7   4   0   17.55    0.68
   7   4   0   17.45    0.91
  -8  -4   0   32.72    1.53
   8   4   0   34.50    1.40
  -9  -4   0   25.30    1.40
   9   4   0   25.68    1.30
 -10  -4   0    5.90    0.88
  10   4   0    6.78    0.79
 -11  -4   0    0.46    0.42
  11   4   0    0.29    0.29
 -12  -4   0    1.56    0.64
  12   4   0    0.23    0.39
  10  -5   0   14.00    1.17
 -10   5   0   15.96    1.17
   9  -5   0    5.84    0.87
  -9   5   0    6.09    0.71
   8  -5   0    5.30    0.78
  -8   5   0    4.49    0.69
   7  -5   0    5.07    0.73
  -7   5   0    4.15    0.63
   6  -5   0    2.14    0.43
  -6   5   0    1.43    0.38
  -6   5   0    1.24    0.29
   5  -5   0   12.78    0.80
  -5   5   0   13.29    0.82
  -5   5   0   13.46    0.71
   4  -5   0    6.43    0.54
  -4   5   0    6.08    0.52
  -4   5   0    6.48    0.50
   3  -5   0   34.14    1.13
  -3   5   0   32.30    1.13
  -3   5   0   31.95    1.16
   2  -5   0   78.11    1.77
   2  -5   0   78.65    1.97
  -2   5   0   78.90    1.93
   1  -5   0   51.82    1.47
   1  -5   0   51.24    1.25
  -1   5   0   52.93    1.49
   0  -5   0   14.43    0.52
   0  -5   0   14.52    0.70
   0   5   0   13.49    0.69
  -1  -5   0   47.98    1.04
  -1  -5   0   49.36    1.42
   1   5   0   49.50    1.41
  -2  -5   0    1.52    0.16
  -2  -5   0    1.31    0.27
   2   5   0    1.17    0.25
  -3  -5   0  203.76    3.89
   3   5   0  203.91    3.72
   3   5   0  196.32    3.30
  -4  -5   0  117.44    2.72
   4   5   0  111.07    2.18
   4   5   0  107.11    2.36
  -5  -5   0    6.41    0.59
   5   5   0    7.92    0.47
   5   5   0    7.63    0.50
  -6  -5   0    4.21    0.60
   6   5   0    3.55    0.38
   6   5   0    4.16    0.38
  -7  -5   0    8.05    0.72
   7   5   0    8.47    0.51
   7   5   0    7.72    0.63
  -8  -5   0   20.03    1.22
   8   5   0   20.32    1.04
  -9  -5   0    3.81    0.72
   9   5   0    3.40    0.64
 -10  -5   0   12.97    1.07
  10   5   0   12.66    0.98
 -11  -5   0    3.84    0.71
  11   5   0    3.35    0.67
 -12  -5   0   -0.47    0.16
  12   5   0   -0.53    0.31
   9  -6   0    0.32    0.26
  -9   6   0    0.47    0.37
   8  -6   0    9.74    0.90
  -8   6   0   10.04    0.87
   7  -6   0    1.06    0.41
  -7   6   0    0.32    0.21
   6  -6   0    2.21    0.49
  -6   6   0    3.04    0.57
  -6   6   0    2.68    0.43
   5  -6   0   23.12    1.11
  -5   6   0   21.54    1.02
  -5   6   0   22.55    1.13
   4  -6   0    3.69    0.42
  -4   6   0    3.67    0.54
  -4   6   0    3.62    0.52
   3  -6   0    0.26    0.15
  -3   6   0    0.25    0.15
   2  -6   0   18.09    0.79
   2  -6   0   18.85    0.92
  -2   6   0   18.93    0.91
   1  -6   0   44.30    1.18
   1  -6   0   41.24    1.40
  -1   6   0   42.05    1.41
   0  -6   0   13.20    0.76
   0  -6   0   12.99    0.53
   0   6   0   13.35    0.74
  -1  -6   0    5.96    0.33
  -1  -6   0    6.13    0.52
   1   6   0    5.24    0.48
  -2  -6   0   62.95    1.29
  -2  -6   0   63.17    1.81
   2   6   0   60.48    1.74
  -3  -6   0   14.28    0.83
   3   6   0   14.46    0.53
   3   6   0   13.99    0.77
  -4  -6   0    4.40    0.46
   4   6   0    4.00    0.31
   4   6   0    3.71    0.40
  -5  -6   0   48.07    1.70
   5   6   0   45.61    1.44
   5   6   0   47.51    1.29
  -6  -6   0   19.55    1.11
   6   6   0   19.91    0.91
   6   6   0   19.65    0.86
  -7  -6   0    2.42    0.56
   7   6   0    2.82    0.39
   7   6   0    3.70    0.55
  -8  -6   0   11.66    0.97
   8   6   0    9.66    0.75
   8   6   0   10.83    0.75
  -9  -6   0    8.70    0.89
   9   6   0   11.06    0.85
 -10  -6   0    1.16    0.41
  10   6   0    2.06    0.53
 -11  -6   0    1.73    0.58
  11   6   0    2.39    0.66
   8  -7   0    1.91    0.48
  -8   7   0    0.88    0.39
   7  -7   0   -0.05    0.19
  -7   7   0    0.54    0.35
   6  -7   0   19.73    1.12
  -6   7   0   18.72    1.13
  -6   7   0   18.71    1.41
   5  -7   0    6.90    0.61
  -5   7   0    7.44    0.64
  -5   7   0    8.53    0.72
   4  -7   0   13.27    0.81
   4  -7   0   12.59    0.86
  -4   7   0   11.21    0.77
   3  -7   0   21.28    0.97
   3  -7   0   22.30    1.11
  -3   7   0   20.87    1.06
   2  -7   0    0.84    0.22
   2  -7   0    0.70    0.19
  -2   7   0    0.27    0.25
   1  -7   0    2.68    0.29
   1  -7   0    3.63    0.40
  -1   7   0    2.99    0.50
   0  -7   0   44.68    1.57
   0  -7   0   43.91    1.14
   0   7   0   46.04    1.60
  -1  -7   0   21.20    0.68
  -1  -7   0   23.07    1.09
   1   7   0   23.15    1.09
  -2  -7   0    1.73    0.36
  -2  -7   0    1.40    0.21
   2   7   0    1.67    0.35
  -3  -7   0   25.59    1.21
   3   7   0   26.42    1.16
  -4  -7   0   62.91    2.07
   4   7   0   65.37    1.93
  -5  -7   0    3.14    0.57
   5   7   0    2.68    0.42
  -6  -7   0    1.50    0.41
   6   7   0    1.45    0.38
  -7  -7   0   27.55    1.45
   7   7   0   27.29    1.16
  -8  -7   0    1.12    0.27
  -9  -7   0   29.64    1.71
 -10  -7   0    8.25    1.22
 -11  -7   0    4.47    0.91
  -7   8   0    5.83    0.87
   6  -8   0    9.82    0.90
   5  -8   0    2.20    0.53
  -5   8   0    2.05    0.39
   4  -8   0    3.46    0.59
  -4   8   0    3.80    0.59
   3  -8   0    1.84    0.37
  -3   8   0    2.21    0.48
   2  -8   0    2.54    0.50
  -2   8   0    2.84    0.48
   1  -8   0   14.50    0.91
  -1   8   0   14.57    0.92
   0  -8   0   41.09    1.59
   0   8   0   39.10    1.57
  -1  -8   0    0.68    0.27
   1   8   0    1.35    0.31
  -2  -8   0    7.09    0.64
   2   8   0    7.22    0.69
  -3  -8   0    0.51    0.18
   3   8   0    0.04    0.22
  -4  -8   0   25.92    1.33
   4   8   0   25.59    1.23
  -5  -8   0    6.88    0.74
   5   8   0    7.28    0.63
  -6  -8   0    9.67    0.87
   6   8   0    9.87    0.74
  -7  -8   0    5.46    0.87
   7   8   0    6.68    0.61
  -8  -8   0   11.34    1.03
   8   8   0   11.07    0.79
  -9  -8   0    1.03    0.33
 -10  -8   0   -0.23    0.37
   6  -9   0    0.79    0.30
   5  -9   0    0.99    0.42
  -5   9   0    1.02    0.39
   4  -9   0    1.03    0.37
  -4   9   0    0.41    0.32
   3  -9   0    4.39    0.70
  -3   9   0    4.21    0.64
  -2   9   0    1.27    0.40
   1  -9   0    6.55    0.71
  -1   9   0    8.31    0.76
   0  -9   0    5.48    0.64
   0   9   0    5.11    0.75
  -1  -9   0    1.06    0.37
   1   9   0    0.67    0.39
  -2  -9   0    2.09    0.52
   2   9   0    1.69    0.42
  -3  -9   0    2.89    0.59
   3   9   0    4.14    0.63
  -4  -9   0    0.49    0.25
   4   9   0    0.33    0.20
   5   9   0   -0.13    0.18
  -6  -9   0    8.12    0.84
   6   9   0    8.70    0.75
  -7  -9   0    0.45    0.36
   7   9   0    0.70    0.29
  -8  -9   0    5.88    1.00
   8   9   0    5.66    0.60
  -9  -9   0    0.66    0.54
   4 -10   0    0.10    0.20
  -4  10   0   -0.65    0.36
   3 -10   0    3.45    0.66
  -3  10   0    2.53    0.53
   2 -10   0    5.04    0.82
  -2  10   0    5.27    0.81
   1 -10   0    6.77    0.92
  -1  10   0    5.57    0.64
   0 -10   0   19.53    1.23
   0  10   0   18.59    1.21
  -1 -10   0    3.77    0.68
   1  10   0    3.29    0.65
  -2 -10   0    0.70    0.40
   2  10   0    1.05    0.38
  -3 -10   0    1.04    0.44
   3  10   0    0.84    0.35
  -4 -10   0    0.58    0.33
   4  10   0    2.47    0.47
  -5 -10   0    3.72    0.75
   5  10   0    4.19    0.71
  -6 -10   0    0.83    0.30
   6  10   0    0.66    0.35
  -7 -10   0   11.98    1.14
   7  10   0   12.34    0.95
  -8 -10   0    6.16    1.09
   8  10   0    6.27    0.83
   2 -11   0    5.45    0.93
  -2  11   0    5.78    0.93
   1 -11   0    4.75    0.79
  -1  11   0    5.32    0.83
   0 -11   0    0.33    0.34
   0  11   0    0.99    0.56
  -1 -11   0    0.33    0.23
   1  11   0    0.63    0.39
  -2 -11   0    1.42    0.38
   2  11   0    0.82    0.47
  -3 -11   0    1.54    0.49
   3  11   0    1.84    0.51
  -4 -11   0    3.33    0.66
   4  11   0    2.85    0.57
  -5 -11   0   14.56    1.24
   5  11   0   13.97    1.11
  -6 -11   0    4.36    0.80
   6  11   0    5.00    0.84
   5  11  -1   20.10    1.33
  -5 -11   1   19.47    1.50
   4  11  -1    1.96    0.55
  -4 -11   1    2.66    0.61
   3  11  -1    4.60    0.78
  -3 -11   1    3.95    0.77
   2  11  -1   18.90    1.33
  -2 -11   1   19.61    1.36
   1  11  -1    5.37    0.95
  -1 -11   1    5.29    0.87
   0  11  -1   11.44    1.01
   0 -11   1   11.29    1.03
  -1  11  -1    2.98    0.57
   1 -11   1    1.58    0.59
   7  10  -1   11.86    0.98
  -7 -10   1   10.91    1.17
   6  10  -1   24.23    1.38
  -6 -10   1   23.06    1.50
   5  10  -1    5.42    0.84
  -5 -10   1    4.27    0.81
   4  10  -1    0.77    0.30
  -4 -10   1    0.61    0.32
   3  10  -1   11.44    0.95
  -3 -10   1   10.08    0.98
   2  10  -1    3.25    0.63
  -2 -10   1    2.77    0.69
   1  10  -1    1.90    0.42
  -1 -10   1    1.57    0.45
   0  10  -1   40.26    1.80
   0 -10   1   38.80    1.84
  -1  10  -1    0.73    0.36
  -2  10  -1    1.70    0.49
   2 -10   1    1.36    0.46
  -3  10  -1    2.27    0.55
   3 -10   1    1.40    0.51
  -4  10  -1    1.81    0.43
   4 -10   1    1.13    0.49
   8   9  -1    2.60    0.47
  -8  -9   1    2.78    0.75
   7   9  -1    4.64    0.73
  -7  -9   1    5.22    0.98
   6   9  -1    9.90    0.82
  -6  -9   1   10.12    0.95
   5   9  -1    6.29    0.87
  -5  -9   1    5.64    0.84
   4   9  -1   11.56    0.89
  -4  -9   1   10.56    0.96
   3   9  -1    1.14    0.31
  -3  -9   1    1.06    0.36
   2   9  -1    1.18    0.27
  -2  -9   1    1.02    0.40
   1   9  -1   23.25    1.32
  -1  -9   1   22.80    1.32
   0   9  -1    3.64    0.67
   0  -9   1    4.82    0.76
  -1   9  -1   17.62    1.17
   1  -9   1   17.05    1.14
  -2   9  -1    2.25    0.52
   2  -9   1    4.01    0.65
  -3   9  -1   -0.04    0.36
   3  -9   1    0.89    0.23
  -4   9  -1    0.47    0.34
   4  -9   1    0.42    0.38
  -5   9  -1    0.84    0.27
   5  -9   1    0.78    0.25
  -9  -8   1   13.49    1.20
   8   8  -1    0.37    0.26
  -8  -8   1    0.26    0.28
   7   8  -1    3.09    0.57
  -7  -8   1    3.88    0.74
   6   8  -1    7.96    0.69
  -6  -8   1    7.01    0.83
   5   8  -1    0.29    0.25
  -5  -8   1    1.03    0.43
   4   8  -1   24.39    1.25
  -4  -8   1   26.77    1.43
   3   8  -1    4.39    0.53
  -3  -8   1    5.34    0.61
   2   8  -1    0.16    0.22
  -2  -8   1    0.67    0.24
   1   8  -1   12.39    0.89
  -1  -8   1   14.40    0.97
   0   8  -1    1.10    0.28
   0  -8   1    0.94    0.35
  -1   8  -1    8.85    0.76
   1  -8   1    9.26    0.79
  -2   8  -1    0.11    0.23
   2  -8   1    1.03    0.28
  -3   8  -1    2.51    0.57
   3  -8   1    2.73    0.49
  -4   8  -1    6.76    0.70
   4  -8   1    5.89    0.82
  -5   8  -1    2.23    0.55
   5  -8   1    2.07    0.52
   6  -8   1    0.90    0.36
   7  -8   1   -0.46    0.31
 -10  -7   1    1.79    0.74
  -9  -7   1    4.51    0.87
   8   7  -1    0.66    0.24
  -8  -7   1    0.46    0.28
   7   7  -1    4.04    0.58
  -7  -7   1    3.13    0.61
   6   7  -1    0.97    0.29
  -6  -7   1    1.87    0.40
   5   7  -1   23.85    1.14
  -5  -7   1   21.71    1.28
   4   7  -1    0.61    0.25
  -4  -7   1    0.37    0.31
   3   7  -1    6.54    0.59
  -3  -7   1    6.20    0.64
   2   7  -1   11.07    0.78
  -2  -7   1   11.43    0.82
   1   7  -1    1.92    0.42
  -1  -7   1    2.52    0.48
   0   7  -1   24.07    1.16
   0  -7   1   21.45    1.12
  -1   7  -1    5.04    0.57
   1  -7   1    4.89    0.53
  -2   7  -1    9.45    0.75
   2  -7   1    9.98    0.74
  -3   7  -1    0.95    0.31
   3  -7   1    1.02    0.33
  -4   7  -1    4.99    0.69
   4  -7   1    5.20    0.58
   4  -7   1    5.27    0.74
  -5   7  -1    2.82    0.57
   5  -7   1    3.07    0.49
   5  -7   1    2.96    0.56
  -6   7  -1    4.11    0.69
   6  -7   1    5.20    0.57
  -7   7  -1   25.00    1.40
   7  -7   1   22.51    1.35
  -8   7  -1    0.47    0.21
 -11  -6   1    3.60    0.82
 -10  -6   1   16.55    1.34
  -9  -6   1    0.63    0.36
   8   6  -1    5.28    0.63
  -8  -6   1    6.17    0.90
   7   6  -1   21.05    0.96
  -7  -6   1   21.72    1.30
   6   6  -1    1.84    0.34
  -6  -6   1    1.70    0.48
   5   6  -1   15.96    0.86
  -5  -6   1   16.87    1.04
   4   6  -1   12.03    0.73
  -4  -6   1   13.67    0.88
   3   6  -1    1.30    0.28
  -3  -6   1    1.20    0.29
   2   6  -1   -0.08    0.08
  -2  -6   1    0.40    0.18
   1   6  -1   76.94    2.10
  -1  -6   1   78.68    2.17
   0   6  -1    7.93    0.60
   0  -6   1    8.36    0.64
   0  -6   1    7.55    0.32
  -1   6  -1   53.69    1.68
   1  -6   1   53.69    1.24
   1  -6   1   54.39    1.73
  -2   6  -1   52.11    1.65
   2  -6   1   50.63    1.34
   2  -6   1   52.84    1.74
  -3   6  -1   51.97    1.67
   3  -6   1   53.37    1.48
   3  -6   1   53.88    1.82
  -4   6  -1    2.56    0.43
  -4   6  -1    2.86    0.52
   4  -6   1    3.09    0.45
  -5   6  -1    6.00    0.58
  -5   6  -1    6.87    0.63
   5  -6   1    6.43    0.56
  -6   6  -1    3.95    0.69
  -6   6  -1    3.23    0.51
   6  -6   1    3.35    0.56
  -7   6  -1   -0.13    0.15
   7  -6   1   -0.08    0.17
  -8   6  -1    3.48    0.68
   8  -6   1    2.98    0.55
  -9   6  -1    3.10    0.63
   9  -6   1    3.31    0.72
  11   5  -1    0.68    0.29
 -11  -5   1    0.45    0.36
  10   5  -1    6.25    0.71
 -10  -5   1    7.80    0.84
   9   5  -1    8.62    0.73
  -9  -5   1    8.94    0.85
   8   5  -1    5.42    0.57
  -8  -5   1    5.69    0.67
   7   5  -1    0.49    0.21
   7   5  -1    0.32    0.19
  -7  -5   1    0.61    0.31
   6   5  -1    3.23    0.44
   6   5  -1    3.17    0.36
  -6  -5   1    3.85    0.59
   5   5  -1   38.08    1.26
   5   5  -1   38.54    1.13
  -5  -5   1   37.29    1.49
   4   5  -1   22.04    0.94
   4   5  -1   23.46    0.75
  -4  -5   1   23.65    1.11
   3   5  -1   65.76    1.76
   3   5  -1   68.31    1.31
  -3  -5   1   68.16    1.96
   2   5  -1  172.96    2.62
   2   5  -1  173.88    3.40
  -2  -5   1  171.55    3.51
   1   5  -1   13.90    0.33
   1   5  -1   14.56    0.75
  -1  -5   1   13.61    0.76
  -1  -5   1   14.00    0.33
   0   5  -1    2.53    0.39
   0  -5   1    2.87    0.18
   0  -5   1    3.02    0.44
  -1   5  -1   35.37    1.22
   1  -5   1   36.47    0.92
   1  -5   1   36.52    1.26
  -2   5  -1    1.00    0.29
   2  -5   1    1.02    0.20
   2  -5   1    1.05    0.27
  -3   5  -1   83.92    2.14
  -3   5  -1   81.33    2.03
   3  -5   1   79.71    1.87
  -4   5  -1   47.61    1.59
  -4   5  -1   46.46    1.45
   4  -5   1   47.09    1.45
  -5   5  -1    5.73    0.46
  -5   5  -1    5.02    0.54
   5  -5   1    5.49    0.50
  -6   5  -1    1.43    0.38
  -6   5  -1    1.94    0.37
   6  -5   1    2.17    0.44
  -7   5  -1    0.36    0.21
   7  -5   1    0.12    0.22
  -8   5  -1    0.57    0.31
   8  -5   1    1.05    0.35
  -9   5  -1    1.92    0.60
   9  -5   1    1.81    0.49
 -10   5  -1    4.23    0.85
  10  -5   1    3.19    0.74
  11   4  -1    4.91    0.84
 -11  -4   1    5.08    0.84
  10   4  -1    0.24    0.34
 -10  -4   1    0.19    0.35
   9   4  -1    3.69    0.57
  -9  -4   1    2.59    0.62
   8   4  -1    9.92    0.76
  -8  -4   1   10.91    0.91
   7   4  -1    8.45    0.62
   7   4  -1    8.34    0.51
  -7  -4   1    8.08    0.74
   6   4  -1   55.22    1.57
   6   4  -1   52.48    1.43
  -6  -4   1   56.24    1.87
   5   4  -1   39.35    1.18
   5   4  -1   40.34    1.20
  -5  -4   1   41.40    1.52
   4   4  -1   36.05    1.12
   4   4  -1   34.45    0.98
  -4  -4   1   32.69    1.27
   3   4  -1   17.67    0.56
   3   4  -1   17.71    0.75
  -3  -4   1   17.45    0.84
   2   4  -1  252.21    3.79
   2   4  -1  258.90    4.40
  -2  -4   1  256.82    4.53
   1   4  -1  287.19    4.86
   1   4  -1  286.15    4.13
  -1  -4   1  297.38    5.00
   0   4  -1   30.22    1.01
   0  -4   1   28.22    0.61
   0  -4   1   29.23    1.02
  -1   4  -1    0.32    0.14
   1  -4   1    0.13    0.08
   1  -4   1    0.16    0.15
  -2   4  -1   59.86    1.53
  -2   4  -1   58.28    1.57
   2  -4   1   58.73    1.33
  -3   4  -1    0.33    0.17
  -3   4  -1   -0.05    0.10
   3  -4   1    1.18    0.25
  -4   4  -1    4.95    0.39
  -4   4  -1    4.97    0.46
   4  -4   1    4.97    0.43
  -5   4  -1   44.82    1.30
  -5   4  -1   44.62    1.55
   5  -4   1   43.87    1.45
  -6   4  -1   21.06    1.07
  -6   4  -1   21.55    0.86
   6  -4   1   21.69    1.07
  -7   4  -1    0.57    0.20
   7  -4   1    0.53    0.28
  -8   4  -1    3.09    0.61
   8  -4   1    3.91    0.65
  -9   4  -1   25.13    1.43
   9  -4   1   27.48    1.47
 -10   4  -1    1.82    0.52
  10  -4   1    1.31    0.53
  12   3  -1    0.33    0.29
 -12  -3   1    0.59    0.34
  11   3  -1    4.15    0.74
 -11  -3   1    2.97    0.67
  10   3  -1    2.78    0.54
 -10  -3   1    2.46    0.52
   9   3  -1    7.36    0.76
  -9  -3   1    8.08    0.76
   8   3  -1    0.71    0.19
  -8  -3   1    0.28    0.19
   7   3  -1    0.78    0.31
   7   3  -1    1.09    0.20
  -7  -3   1    0.82    0.32
   6   3  -1  182.30    3.62
   6   3  -1  182.75    3.22
  -6  -3   1  185.87    3.91
   5   3  -1    2.66    0.26
   5   3  -1    2.96    0.32
  -5  -3   1    3.02    0.46
   4   3  -1    4.63    0.34
   4   3  -1    5.10    0.35
  -4  -3   1    5.71    0.47
   3   3  -1   48.44    1.22
   3   3  -1   47.49    1.08
  -3  -3   1   46.94    1.37
   2   3  -1  102.12    1.72
   2   3  -1  103.58    2.05
  -2  -3   1  106.35    2.22
   1   3  -1   87.23    1.82
   1   3  -1   86.88    1.31
   1   3  -1   86.88    1.30
  -1  -3   1   83.16    1.85
   0   3  -1   35.25    1.00
   0   3  -1   35.03    0.63
   0  -3   1   35.84    0.65
   0  -3   1   36.18    1.04
  -1   3  -1   16.37    0.64
   1  -3   1   17.71    0.50
   1  -3   1   18.06    0.71
  -2   3  -1    5.19    0.38
  -2   3  -1    5.32    0.35
   2  -3   1    5.18    0.32
  -3   3  -1   64.55    1.65
  -3   3  -1   65.88    1.50
   3  -3   1   67.19    1.54
  -4   3  -1   89.69    2.15
  -4   3  -1   90.58    1.87
   4  -3   1   91.21    2.07
  -5   3  -1    7.66    0.61
  -5   3  -1    8.39    0.46
   5  -3   1    7.77    0.57
  -6   3  -1    0.16    0.18
  -6   3  -1   -0.07    0.13
   6  -3   1    0.18    0.17
  -7   3  -1    3.81    0.60
   7  -3   1    4.04    0.49
  -8   3  -1    3.88    0.68
   8  -3   1    4.28    0.67
  -9   3  -1    0.23    0.32
   9  -3   1    0.37    0.27
 -10   3  -1    1.25    0.31
  10  -3   1    0.37    0.25
 -11   3  -1    0.26    0.33
  11  -3   1    1.38    0.38
  12   2  -1    8.71    0.96
 -12  -2   1   10.14    1.02
  11   2  -1    0.30    0.35
 -11  -2   1    0.28    0.15
  10   2  -1    2.61    0.59
 -10  -2   1    2.12    0.58
   9   2  -1    1.79    0.47
  -9  -2   1    1.92    0.50
   8   2  -1    1.67    0.41
  -8  -2   1    1.48    0.44
   7   2  -1   89.51    2.39
   7   2  -1   88.86    1.80
  -7  -2   1   89.24    2.49
   6   2  -1    4.01    0.42
   6   2  -1    4.44    0.31
  -6  -2   1    3.42    0.50
   5   2  -1    0.96    0.17
   5   2  -1    0.65    0.20
  -5  -2   1    0.65    0.20
   4   2  -1    2.31    0.25
   4   2  -1    2.49    0.21
  -4  -2   1    2.54    0.36
   3   2  -1   20.90    0.64
   3   2  -1   20.15    0.65
  -3  -2   1   20.97    0.79
   2   2  -1   86.40    1.51
   2   2  -1   84.94    1.65
  -2  -2   1   87.47    1.81
   1   2  -1    8.18    0.21
   1   2  -1    8.09    0.21
   1   2  -1    7.56    0.36
  -1  -2   1    7.66    0.39
   0   2  -1  176.94    2.91
   0   2  -1  174.12    2.55
   0  -2   1  178.08    2.55
   0  -2   1  176.13    2.96
  -1   2  -1   13.32    0.49
  -1   2  -1   13.49    0.53
   1  -2   1   13.41    0.39
  -2   2  -1   41.37    0.99
  -2   2  -1   43.56    1.11
   2  -2   1   43.28    1.00
  -3   2  -1    2.92    0.30
  -3   2  -1    3.05    0.23
   3  -2   1    2.77    0.27
  -4   2  -1   67.08    1.71
  -4   2  -1   67.25    1.37
   4  -2   1   66.43    1.67
  -5   2  -1    2.10    0.36
  -5   2  -1    2.69    0.23
   5  -2   1    3.15    0.45
  -6   2  -1    0.03    0.11
  -6   2  -1    0.28    0.14
   6  -2   1    0.21    0.18
  -7   2  -1    0.44    0.19
   7  -2   1    0.35    0.20
  -8   2  -1   12.44    0.87
   8  -2   1   12.07    0.89
  -9   2  -1    4.40    0.67
   9  -2   1    3.91    0.68
 -10   2  -1    2.69    0.61
  10  -2   1    3.19    0.69
 -11   2  -1    4.88    0.86
  11  -2   1    5.25    0.91
  12   1  -1    0.14    0.20
 -12  -1   1    1.16    0.30
  11   1  -1    0.50    0.33
 -11  -1   1    0.21    0.23
  10   1  -1    5.76    0.88
 -10  -1   1    6.25    0.72
   9   1  -1    1.97    0.50
  -9  -1   1    1.89    0.42
   8   1  -1   21.59    1.15
  -8  -1   1   20.14    1.11
   7   1  -1   32.60    1.35
  -7  -1   1   32.92    1.34
   6   1  -1    4.44    0.48
   6   1  -1    4.42    0.29
  -6  -1   1    5.13    0.48
   5   1  -1    1.54    0.17
   5   1  -1    1.88    0.32
  -5  -1   1    1.16    0.27
   4   1  -1    0.10    0.05
   4   1  -1    0.23    0.09
  -4  -1   1    0.06    0.11
   3   1  -1    1.37    0.21
   3   1  -1    1.33    0.14
  -3  -1   1    1.19    0.20
   2   1  -1    7.50    0.32
   2   1  -1    7.17    0.30
  -2  -1   1    7.12    0.37
   1   1  -1  156.75    2.46
   1   1  -1  154.61    2.33
  -1  -1   1  160.77    2.55
  -1  -1   1  152.41    2.37
   0   1  -1  181.75    2.83
   0  -1   1  187.26    2.89
  -1   1  -1  264.42    4.24
  -1   1  -1  277.19    4.34
   1  -1   1  277.99    4.32
  -2   1  -1  210.85    3.41
  -2   1  -1  211.70    3.18
   2  -1   1  209.91    3.35
  -3   1  -1   38.06    1.05
  -3   1  -1   40.66    0.81
   3  -1   1   38.59    1.04
  -4   1  -1   39.90    1.17
  -4   1  -1   41.01    0.82
   4  -1   1   40.01    1.18
  -5   1  -1   33.64    1.15
  -5   1  -1   33.65    0.71
   5  -1   1   34.45    1.18
  -6   1  -1   22.35    0.50
  -6   1  -1   21.76    0.98
   6  -1   1   21.66    1.02
  -7   1  -1    2.85    0.46
   7  -1   1    3.35    0.53
  -8   1  -1    1.20    0.34
   8  -1   1    1.20    0.30
  -9   1  -1    5.15    0.59
   9  -1   1    6.13    0.84
 -10   1  -1    2.80    0.58
  10  -1   1    1.99    0.54
 -11   1  -1    0.09    0.36
  11  -1   1   -0.08    0.37
 -12   1  -1    7.60    1.08
  12  -1   1    5.89    1.03
  12   0  -1    1.48    0.56
 -12   0   1    2.24    0.45
  11   0  -1    5.81    0.90
 -11   0   1    6.75    0.80
  10   0  -1    0.87    0.41
 -10   0   1    1.03    0.33
   9   0  -1    1.18    0.42
  -9   0   1    1.16    0.39
   8   0  -1    7.90    0.70
  -8   0   1    7.28    0.67
   7   0  -1    4.33    0.52
  -7   0   1    5.18    0.55
   6   0  -1   32.02    1.26
  -6   0   1   33.49    0.83
  -6   0   1   32.81    1.24
   5   0  -1   22.46    0.94
  -5   0   1   22.34    0.91
  -5   0   1   22.34    0.64
   4   0  -1   17.69    0.73
  -4   0   1   16.95    0.52
  -4   0   1   17.12    0.71
   3   0  -1   38.63    0.83
   3   0  -1   38.21    1.03
  -3   0   1   39.18    1.03
   2   0  -1   60.24    1.23
   2   0  -1   58.92    1.10
  -2   0   1   61.20    1.23
   1   0  -1  132.29    2.07
   1   0  -1  134.69    2.12
  -1   0   1  138.59    2.13
   0   0  -1  183.62    2.70
   0   0  -1  179.32    2.83
   0   0  -1  189.93    2.87
   0   0   1  198.37    2.80
   0   0   1  180.75    2.69
   0   0   1  179.05    2.84
  -1   0  -1  106.35    1.69
  -1   0  -1  108.43    1.60
  -1   0  -1  105.26    1.70
   1   0   1  105.89    1.69
   1   0   1  107.25    1.59
  -2   0  -1    2.28    0.18
  -2   0  -1    2.20    0.10
   2   0   1    2.36    0.18
   2   0   1    2.40    0.10
  -3   0  -1  112.69    2.12
  -3   0  -1  115.99    1.65
   3   0   1  116.27    2.16
   3   0   1  114.70    1.66
  -4   0  -1   63.35    1.51
   4   0   1   62.60    1.54
  -5   0  -1   12.53    0.65
   5   0   1   13.07    0.69
  -6   0  -1   17.26    0.84
   6   0   1   17.44    0.88
  -7   0  -1   73.05    2.08
   7   0   1   76.62    2.18
  -8   0  -1   21.60    1.13
   8   0   1   20.99    1.15
  -9   0  -1    0.40    0.26
   9   0   1   -0.17    0.20
 -10   0  -1    1.31    0.41
  10   0   1    0.25    0.39
 -11   0  -1    3.91    0.68
  11   0   1    2.95    0.67
 -12   0  -1    0.79    0.38
  12   0   1    1.44    0.40
  11  -1  -1    5.58    0.86
 -11   1   1    6.09    0.91
  10  -1  -1    1.70    0.52
 -10   1   1    2.02    0.49
   9  -1  -1    2.02    0.55
  -9   1   1    1.63    0.46
   8  -1  -1    0.50    0.24
  -8   1   1    0.62    0.21
   7  -1  -1   21.22    1.10
  -7   1   1   21.59    1.04
   6  -1  -1    0.21    0.20
  -6   1   1    0.06    0.12
  -6   1   1   -0.01    0.09
   5  -1  -1    0.81    0.27
  -5   1   1    0.81    0.16
  -5   1   1    0.76    0.21
   4  -1  -1   -0.05    0.07
  -4   1   1   -0.12    0.05
  -4   1   1   -0.07    0.06
   3  -1  -1   66.16    1.51
  -3   1   1   65.07    1.26
  -3   1   1   66.16    1.43
   2  -1  -1  228.98    3.69
  -2   1   1  225.78    3.47
  -2   1   1  232.32    3.56
   1  -1  -1  525.68    8.37
  -1   1   1  533.12    7.74
  -1   1   1  542.56    8.08
   0  -1  -1  183.19    2.77
   0  -1  -1  181.93    2.72
   0   1   1  182.61    2.72
  -1  -1  -1  279.62    4.10
  -1  -1  -1  258.16    4.09
   1   1   1  254.22    3.77
  -2  -1  -1  382.60    5.33
  -2  -1  -1  377.55    5.60
   2   1   1  349.00    5.29
   2   1   1  367.30    5.92
  -3  -1  -1  324.11    5.10
  -3  -1  -1  338.74    4.60
   3   1   1  326.64    5.15
   3   1   1  332.38    4.62
  -4  -1  -1   23.66    0.83
   4   1   1   23.88    0.82
  -5  -1  -1   23.24    0.91
   5   1   1   23.16    0.91
  -6  -1  -1   67.25    1.87
   6   1   1   70.29    1.91
  -7  -1  -1   71.70    2.06
   7   1   1   72.16    2.09
  -8  -1  -1   75.73    2.25
   8   1   1   78.06    2.34
  -9  -1  -1   11.81    0.85
   9   1   1   10.24    0.83
 -10  -1  -1    3.91    0.63
  10   1   1    3.16    0.71
 -11  -1  -1   10.58    0.96
  11   1   1   10.66    0.98
 -12  -1  -1    1.23    0.50
  12   1   1    0.77    0.40
  11  -2  -1    3.89    0.83
 -11   2   1    3.15    0.72
  10  -2  -1    0.10    0.28
 -10   2   1    0.73    0.31
   9  -2  -1    3.22    0.63
  -9   2   1    4.48    0.65
   8  -2  -1    0.40    0.23
  -8   2   1    0.27    0.16
   7  -2  -1   14.50    0.93
  -7   2   1   15.04    0.88
   6  -2  -1   25.43    1.16
  -6   2   1   25.94    0.77
  -6   2   1   24.26    1.04
   5  -2  -1   35.32    1.29
  -5   2   1   37.14    0.96
  -5   2   1   37.15    1.21
   4  -2  -1   17.49    0.80
  -4   2   1   16.76    0.59
  -4   2   1   16.69    0.70
   3  -2  -1   81.62    1.80
  -3   2   1   80.65    1.67
  -3   2   1   79.90    1.56
   2  -2  -1  181.27    3.03
  -2   2   1  169.32    2.85
  -2   2   1  176.07    2.86
   1  -2  -1   45.01    0.99
  -1   2   1   44.38    0.97
  -1   2   1   45.03    0.89
   0  -2  -1   43.46    0.80
   0  -2  -1   41.05    0.89
   0   2   1   44.29    0.93
  -1  -2  -1  449.70    7.06
  -1  -2  -1  476.45    6.97
   1   2   1  430.23    6.84
  -2  -2  -1  376.77    5.38
  -2  -2  -1  357.82    5.61
   2   2   1  341.09    5.52
  -3  -2  -1    0.02    0.06
   3   2   1    0.12    0.06
   3   2   1    0.49    0.13
  -4  -2  -1   84.53    1.86
   4   2   1   83.92    1.81
   4   2   1   81.71    1.36
  -5  -2  -1    6.55    0.48
   5   2   1    7.83    0.49
   5   2   1    7.03    0.23
  -6  -2  -1    2.77    0.44
   6   2   1    3.57    0.37
   6   2   1    3.43    0.14
  -7  -2  -1  119.23    2.84
   7   2   1  115.61    2.81
  -8  -2  -1    1.83    0.42
   8   2   1    1.61    0.41
  -9  -2  -1    9.88    0.82
   9   2   1   10.67    0.83
 -10  -2  -1    2.78    0.56
  10   2   1    3.17    0.66
 -11  -2  -1    3.47    0.66
  11   2   1    2.69    0.60
 -12  -2  -1    0.40    0.30
  12   2   1    0.46    0.41
  11  -3  -1    7.12    1.11
 -11   3   1    8.34    0.83
  10  -3  -1   -0.21    0.25
 -10   3   1   -0.43    0.35
   9  -3  -1   -0.35    0.24
  -9   3   1    1.03    0.28
   8  -3  -1   12.63    0.92
  -8   3   1   11.43    0.86
   7  -3  -1    0.96    0.29
  -7   3   1    0.60    0.25
   6  -3  -1    0.14    0.19
  -6   3   1    0.04    0.12
  -6   3   1    0.18    0.16
   5  -3  -1    3.72    0.54
  -5   3   1    3.33    0.29
  -5   3   1    3.03    0.36
   4  -3  -1   34.29    1.18
  -4   3   1   34.61    0.99
  -4   3   1   35.01    1.12
   3  -3  -1   28.89    0.97
  -3   3   1   28.35    0.86
  -3   3   1   29.60    0.92
   2  -3  -1   60.05    1.41
  -2   3   1   59.51    1.32
  -2   3   1   60.66    1.36
   1  -3  -1   19.71    0.63
  -1   3   1   18.70    0.57
  -1   3   1   18.26    0.63
   0  -3  -1   12.38    0.43
   0  -3  -1   12.57    0.46
   0   3   1   13.36    0.51
  -1  -3  -1   16.91    0.54
  -1  -3  -1   17.06    0.52
  -2  -3  -1   68.29    1.37
  -2  -3  -1   67.84    1.43
   2   3   1   68.88    1.39
  -3  -3  -1  405.06    6.06
  -3  -3  -1  379.25    5.93
   3   3   1  375.18    5.73
  -4  -3  -1   14.58    0.69
   4   3   1   15.79    0.64
   4   3   1   15.42    0.52
  -5  -3  -1   13.99    0.74
   5   3   1   15.15    0.48
   5   3   1   14.15    0.68
  -6  -3  -1   80.73    2.14
   6   3   1   80.36    2.02
   6   3   1   78.51    1.44
  -7  -3  -1  103.15    2.64
   7   3   1  104.73    2.58
   7   3   1  102.01    1.73
  -8  -3  -1    0.46    0.29
   8   3   1    0.75    0.33
  -9  -3  -1   19.11    1.15
   9   3   1   19.36    1.12
 -10  -3  -1    4.31    0.74
  10   3   1    4.84    0.79
 -11  -3  -1    2.32    0.55
  11   3   1    1.83    0.52
 -12  -3  -1    4.17    0.77
  12   3   1    3.98    0.83
  10  -4  -1   15.78    1.22
 -10   4   1   16.39    1.14
   9  -4  -1    5.68    0.88
  -9   4   1    3.82    0.65
   8  -4  -1    0.45    0.27
  -8   4   1    0.60    0.37
   7  -4  -1   10.37    0.81
  -7   4   1   10.64    0.80
   6  -4  -1    1.19    0.32
  -6   4   1    0.55    0.20
  -6   4   1    0.41    0.20
   5  -4  -1    0.74    0.28
  -5   4   1    0.40    0.18
  -5   4   1    0.68    0.17
   4  -4  -1    0.12    0.16
  -4   4   1    0.34    0.13
  -4   4   1    0.14    0.14
   3  -4  -1    6.18    0.46
  -3   4   1    6.75    0.44
  -3   4   1    6.12    0.43
   2  -4  -1   64.33    1.56
  -2   4   1   62.03    1.52
  -2   4   1   65.57    1.49
   1  -4  -1   15.00    0.60
  -1   4   1   14.92    0.63
   0  -4  -1   18.96    0.65
   0  -4  -1   19.20    0.64
   0   4   1   18.40    0.71
  -1  -4  -1    3.92    0.26
  -1  -4  -1    4.14    0.30
  -2  -4  -1    9.80    0.43
  -2  -4  -1    9.20    0.48
   2   4   1    9.83    0.48
  -3  -4  -1  186.41    3.38
  -3  -4  -1  188.98    3.20
   3   4   1  181.84    3.18
  -4  -4  -1   18.07    0.79
   4   4   1   17.20    0.65
   4   4   1   17.95    0.70
  -5  -4  -1   57.85    1.67
   5   4   1   56.13    1.31
   5   4   1   55.88    1.50
  -6  -4  -1    0.41    0.22
   6   4   1    0.36    0.12
   6   4   1    0.45    0.13
  -7  -4  -1    1.96    0.42
   7   4   1    1.92    0.19
   7   4   1    1.74    0.36
  -8  -4  -1    6.43    0.65
   8   4   1    7.78    0.68
  -9  -4  -1    1.31    0.41
   9   4   1    2.06    0.43
 -10  -4  -1    3.59    0.70
  10   4   1    3.22    0.64
 -11  -4  -1    0.08    0.36
  11   4   1    0.44    0.27
 -12  -4  -1    1.81    0.53
  12   4   1    1.60    0.50
  10  -5  -1    1.29    0.51
 -10   5   1    1.09    0.50
   9  -5  -1    4.12    0.72
  -9   5   1    3.95    0.74
   8  -5  -1    0.75    0.29
  -8   5   1    0.55    0.32
   7  -5  -1    1.01    0.36
  -7   5   1    0.54    0.21
   6  -5  -1    0.57    0.24
  -6   5   1    0.16    0.13
  -6   5   1    0.11    0.14
   5  -5  -1    2.80    0.48
  -5   5   1    2.83    0.45
  -5   5   1    2.92    0.45
   4  -5  -1    0.13    0.20
  -4   5   1    0.90    0.17
  -4   5   1    0.27    0.14
   3  -5  -1    4.76    0.44
  -3   5   1    5.44    0.42
  -3   5   1    5.87    0.45
   2  -5  -1   41.51    1.25
  -2   5   1   40.44    1.25
  -2   5   1   41.06    1.19
   1  -5  -1   11.47    0.56
   1  -5  -1   11.61    0.57
  -1   5   1   10.67    0.60
   0  -5  -1   34.11    1.04
   0  -5  -1   35.02    0.99
   0   5   1   35.59    1.15
  -1  -5  -1    3.19    0.26
  -1  -5  -1    3.47    0.32
   1   5   1    3.80    0.35
  -2  -5  -1   76.33    1.59
  -2  -5  -1   76.70    1.81
   2   5   1   74.83    1.78
  -3  -5  -1    8.73    0.45
  -3  -5  -1    8.34    0.54
   3   5   1    8.32    0.51
  -4  -5  -1    2.10    0.35
   4   5   1    1.98    0.24
   4   5   1    2.25    0.26
  -5  -5  -1    0.20    0.21
   5   5   1    0.17    0.12
   5   5   1    0.38    0.13
  -6  -5  -1   17.89    0.98
   6   5   1   18.43    0.73
   6   5   1   18.00    0.85
  -7  -5  -1   10.45    0.82
   7   5   1   10.77    0.71
   7   5   1   11.37    0.55
  -8  -5  -1   22.17    1.24
   8   5   1   21.80    1.10
  -9  -5  -1    2.85    0.56
   9   5   1    3.75    0.62
 -10  -5  -1    0.57    0.34
  10   5   1    1.11    0.39
 -11  -5  -1   25.15    1.56
  11   5   1   27.41    1.50
 -12  -5  -1    0.43    0.30
  12   5   1    0.95    0.47
   9  -6  -1    1.00    0.34
  -9   6   1   -0.52    0.23
   8  -6  -1    7.13    0.99
  -8   6   1    7.05    0.75
   7  -6  -1   -0.01    0.29
  -7   6   1    0.15    0.25
   6  -6  -1    6.31    0.67
  -6   6   1    5.34    0.53
  -6   6   1    5.79    0.53
   5  -6  -1    1.61    0.40
  -5   6   1    1.57    0.40
  -5   6   1    1.87    0.41
   4  -6  -1   44.04    1.53
  -4   6   1   41.06    1.42
  -4   6   1   42.20    1.44
   3  -6  -1   26.76    1.10
  -3   6   1   28.12    1.12
  -3   6   1   25.73    1.03
   2  -6  -1    2.60    0.40
   2  -6  -1    2.33    0.37
  -2   6   1    2.68    0.41
   1  -6  -1    8.82    0.57
   1  -6  -1   10.03    0.56
  -1   6   1    9.09    0.60
   0  -6  -1    9.07    0.56
   0  -6  -1    9.82    0.51
   0   6   1    9.84    0.62
  -1  -6  -1    4.04    0.39
  -1  -6  -1    3.96    0.31
   1   6   1    3.65    0.40
  -2  -6  -1   60.34    1.65
  -2  -6  -1   57.67    1.36
   2   6   1   58.52    1.65
  -3  -6  -1   54.55    1.62
  -3  -6  -1   53.97    1.33
   3   6   1   54.17    1.56
  -4  -6  -1   41.87    1.46
   4   6   1   41.48    1.16
   4   6   1   41.60    1.32
  -5  -6  -1    0.11    0.12
   5   6   1    0.19    0.17
   5   6   1    0.09    0.15
  -6  -6  -1  106.84    2.80
   6   6   1  108.09    2.45
   6   6   1  107.35    2.36
  -7  -6  -1    7.18    0.69
   7   6   1    7.77    0.57
   7   6   1    8.27    0.54
  -8  -6  -1    1.37    0.47
   8   6   1    0.93    0.35
  -9  -6  -1   21.45    1.35
   9   6   1   21.53    1.16
 -10  -6  -1   22.53    1.41
  10   6   1   22.00    1.26
 -11  -6  -1    1.39    0.33
  11   6   1    0.62    0.43
 -12  -6  -1    0.76    0.38
  12   6   1    1.69    0.58
   8  -7  -1   15.61    1.16
  -8   7   1   15.16    1.09
   7  -7  -1    1.86    0.49
  -7   7   1    2.96    0.59
   6  -7  -1   10.19    0.81
  -6   7   1   12.10    0.86
  -6   7   1    9.32    0.80
   5  -7  -1    2.28    0.46
  -5   7   1    1.78    0.37
  -5   7   1    1.47    0.38
   4  -7  -1    4.91    0.55
  -4   7   1    5.66    0.56
  -4   7   1    6.09    0.56
   3  -7  -1   12.24    0.79
   3  -7  -1   11.45    0.74
  -3   7   1   11.83    0.79
   2  -7  -1    7.94    0.60
   2  -7  -1    7.84    0.56
  -2   7   1    7.89    0.64
   1  -7  -1   43.67    1.33
   1  -7  -1   43.65    1.45
  -1   7   1   44.42    1.54
   0  -7  -1    0.84    0.23
   0  -7  -1    1.05    0.22
   0   7   1    0.92    0.28
  -1  -7  -1   11.79    0.57
  -1  -7  -1   12.00    0.72
   1   7   1   10.85    0.73
  -2  -7  -1   23.19    1.03
  -2  -7  -1   22.94    0.80
   2   7   1   23.70    1.06
  -3  -7  -1    6.40    0.41
  -3  -7  -1    7.43    0.62
   3   7   1    7.03    0.57
  -4  -7  -1   17.41    0.97
   4   7   1   18.23    0.73
   4   7   1   19.20    0.93
  -5  -7  -1   63.17    2.03
   5   7   1   64.99    1.64
   5   7   1   64.23    1.85
  -6  -7  -1    5.79    0.63
   6   7   1    6.26    0.51
   6   7   1    5.60    0.49
  -7  -7  -1    5.04    0.75
   7   7   1    4.85    0.46
   7   7   1    4.60    0.45
  -8  -7  -1   17.72    1.16
   8   7   1   16.53    0.83
   8   7   1   16.08    0.93
  -9  -7  -1    3.76    0.76
   9   7   1    3.64    0.61
 -10  -7  -1   17.48    1.32
  10   7   1   18.86    1.14
 -11  -7  -1    3.27    0.77
   7  -8  -1   11.11    0.94
  -7   8   1   11.99    0.91
   6  -8  -1    0.48    0.31
  -6   8   1    0.35    0.25
   5  -8  -1    7.77    0.72
   5  -8  -1    6.97    0.70
  -5   8   1    7.30    0.68
   4  -8  -1    1.14    0.39
   4  -8  -1    0.22    0.26
  -4   8   1   -0.13    0.16
   3  -8  -1    1.92    0.39
   3  -8  -1    0.93    0.30
  -3   8   1    1.56    0.36
   2  -8  -1    8.08    0.58
   2  -8  -1    7.72    0.64
  -2   8   1    8.71    0.70
   1  -8  -1    2.99    0.48
   1  -8  -1    2.76    0.32
  -1   8   1    3.30    0.54
   0  -8  -1   21.88    0.87
   0  -8  -1   22.31    1.07
   0   8   1   22.83    1.14
  -1  -8  -1   24.33    0.88
  -1  -8  -1   26.79    1.18
   1   8   1   23.18    1.14
  -2  -8  -1   42.94    1.56
  -2  -8  -1   44.06    1.19
   2   8   1   43.72    1.62
  -3  -8  -1   17.62    1.00
  -3  -8  -1   16.16    0.71
   3   8   1   16.96    0.96
  -4  -8  -1    9.02    0.71
   4   8   1    8.98    0.71
  -5  -8  -1   14.98    0.98
   5   8   1   13.64    0.86
  -6  -8  -1    5.94    0.82
   6   8   1    5.97    0.54
  -7  -8  -1   20.20    1.28
   7   8   1   19.20    0.99
  -8  -8  -1    1.60    0.53
   8   8   1    2.30    0.41
  -9  -8  -1   11.28    1.06
 -10  -8  -1    5.21    0.84
 -11  -8  -1   -0.57    0.27
   5  -9  -1    1.97    0.44
  -5   9   1    1.76    0.42
   4  -9  -1    0.84    0.22
  -4   9   1    0.94    0.36
   3  -9  -1    6.52    0.68
  -3   9   1    5.81    0.64
   2  -9  -1   31.43    1.42
  -2   9   1   32.18    1.50
   1  -9  -1    1.35    0.32
  -1   9   1    0.52    0.30
   0  -9  -1    2.57    0.49
   0   9   1    1.69    0.42
  -1  -9  -1   26.77    1.27
   1   9   1   28.02    1.36
  -2  -9  -1    2.10    0.45
   2   9   1    3.04    0.52
  -3  -9  -1    5.30    0.60
   3   9   1    5.83    0.59
  -4  -9  -1    6.39    0.66
   4   9   1    4.73    0.68
  -5  -9  -1   11.36    0.89
   5   9   1   10.56    0.81
  -6  -9  -1    1.31    0.33
   6   9   1    1.58    0.32
  -7  -9  -1   10.28    0.93
   7   9   1    8.59    0.72
  -8  -9  -1   13.38    1.16
   8   9   1   14.04    0.90
  -9  -9  -1    3.70    0.80
 -10  -9  -1   -0.32    0.22
  -5  10   1   -0.23    0.28
  -4  10   1    0.28    0.23
   3 -10  -1   -0.01    0.26
  -3  10   1   -0.40    0.16
   2 -10  -1    0.52    0.25
  -2  10   1    0.59    0.27
   1 -10  -1    4.98    0.74
  -1  10   1    4.92    0.59
   0 -10  -1    1.12    0.32
   0  10   1    0.48    0.33
  -1 -10  -1   17.42    1.07
   1  10   1   19.13    1.21
  -2 -10  -1    2.38    0.55
   2  10   1    3.72    0.61
  -3 -10  -1    0.25    0.26
   3  10   1    0.20    0.23
  -4 -10  -1    1.25    0.34
   4  10   1    0.45    0.26
  -5 -10  -1    0.78    0.32
   5  10   1    0.23    0.25
  -6 -10  -1   11.32    0.96
   6  10   1   11.36    0.86
  -7 -10  -1   -0.39    0.20
   7  10   1    0.91    0.23
  -8 -10  -1    0.41    0.52
   8  10   1    0.51    0.20
  -9 -10  -1    1.42    0.65
  -3  11   1    6.98    0.83
   2 -11  -1    2.80    0.99
  -2  11   1    3.35    0.63
   1 -11  -1    2.42    0.53
  -1  11   1    2.52    0.67
   0 -11  -1   11.16    0.92
   0  11   1   11.84    1.02
  -1 -11  -1    0.20    0.32
   1  11   1   -0.08    0.17
  -2 -11  -1    1.93    0.45
   2  11   1    1.21    0.51
  -3 -11  -1    1.05    0.36
   3  11   1    0.96    0.51
  -4 -11  -1    1.90    0.42
  -5 -11  -1    0.49    0.24
   5  11   1    0.52    0.23
  -6 -11  -1    5.99    0.89
   6  11   1    5.80    0.69
  -7 -11  -1    9.87    1.09
   7  11   1    9.47    0.90
  -8 -11  -1    0.07    0.47
   0  12   1    0.58    0.28
  -1 -12  -1    0.42    0.37
   1  12   1    0.72    0.59
  -2 -12  -1    4.15    0.75
   2  12   1    4.06    0.71
  -3 -12  -1   -0.31    0.26
   3  12   1    0.42    0.42
  -4 -12  -1    0.64    0.42
   4  12   1    1.03    0.36
  -5 -12  -1    4.80    0.87
   5  12   1    6.69    0.77
   6  10  -2    3.28    0.70
  -6 -10   2    2.61    0.60
   5  10  -2    1.52    0.47
  -5 -10   2    1.96    0.52
   4  10  -2    0.64    0.32
  -4 -10   2    0.74    0.33
   3  10  -2    2.94    0.60
  -3 -10   2    2.86    0.70
   2  10  -2   13.43    1.14
  -2 -10   2   14.15    1.18
   1  10  -2    2.85    0.55
  -1 -10   2    3.14    0.67
   0  10  -2   17.67    1.21
   0 -10   2   12.69    1.13
  -1  10  -2   27.01    1.55
   1 -10   2   27.18    1.60
  -2  10  -2    5.72    0.84
   2 -10   2    6.82    1.01
  -3  10  -2    0.74    0.33
   3 -10   2    0.97    0.49
   7   9  -2   27.61    1.40
  -7  -9   2   25.70    1.72
   6   9  -2    0.02    0.30
  -6  -9   2    0.73    0.40
   5   9  -2    5.87    0.68
  -5  -9   2    7.71    1.07
   4   9  -2   13.27    1.02
  -4  -9   2   11.66    1.04
   3   9  -2   34.76    1.66
  -3  -9   2   35.05    1.78
   2   9  -2    1.10    0.34
  -2  -9   2    0.51    0.30
   1   9  -2    9.77    0.90
  -1  -9   2    8.22    0.84
   0   9  -2   21.07    1.28
   0  -9   2   21.67    1.37
  -1   9  -2    2.36    0.52
   1  -9   2    2.49    0.57
  -2   9  -2    6.64    0.71
   2  -9   2    6.71    0.76
  -3   9  -2    9.91    0.88
   3  -9   2    8.30    0.88
  -4   9  -2    2.45    0.53
   4  -9   2    2.38    0.61
  -5   9  -2   -0.21    0.31
   5  -9   2    1.38    0.32
  -9  -8   2    0.01    0.23
   8   8  -2    7.65    0.79
  -8  -8   2    7.74    0.89
   7   8  -2    0.13    0.20
  -7  -8   2   -0.12    0.32
   6   8  -2    6.17    0.66
  -6  -8   2    6.45    0.78
   5   8  -2    6.34    0.65
  -5  -8   2    7.29    0.85
   4   8  -2    5.73    0.63
  -4  -8   2    6.87    0.97
   3   8  -2   12.67    0.95
  -3  -8   2   13.32    1.03
   2   8  -2   10.85    0.84
  -2  -8   2    9.93    0.85
   1   8  -2    0.28    0.22
  -1  -8   2    0.13    0.16
   0   8  -2    0.91    0.25
   0  -8   2    0.24    0.27
  -1   8  -2   20.62    1.15
   1  -8   2   17.81    1.16
  -2   8  -2    0.24    0.24
   2  -8   2    0.57    0.29
  -3   8  -2    0.20    0.12
   3  -8   2    0.37    0.19
  -4   8  -2    4.24    0.68
   4  -8   2    4.40    0.71
  -5   8  -2    2.80    0.50
   5  -8   2    3.64    0.74
   6  -8   2    1.72    0.52
  -9  -7   2    0.45    0.37
   8   7  -2   15.55    1.03
  -8  -7   2   14.48    1.24
   7   7  -2    1.77    0.44
  -7  -7   2    1.77    0.50
   6   7  -2    0.14    0.19
  -6  -7   2    0.27    0.22
   5   7  -2    3.44    0.53
  -5  -7   2    2.53    0.54
   4   7  -2   16.25    0.98
  -4  -7   2   16.88    1.12
   3   7  -2    5.81    0.62
  -3  -7   2    4.83    0.74
   2   7  -2   -0.01    0.19
  -2  -7   2   -0.08    0.21
   1   7  -2   16.07    0.96
  -1  -7   2   15.09    1.00
   0   7  -2    1.09    0.35
   0  -7   2    1.38    0.38
  -1   7  -2    4.44    0.51
   1  -7   2    4.38    0.64
  -2   7  -2   26.54    1.25
   2  -7   2   25.67    1.31
  -3   7  -2   36.29    1.48
   3  -7   2   38.27    1.64
  -4   7  -2    5.94    0.58
   4  -7   2    5.45    0.62
  -5   7  -2    0.37    0.18
   5  -7   2   -0.37    0.18
   6  -7   2    3.76    0.73
  -7   7  -2    3.62    0.70
  -8   7  -2    1.71    0.48
 -10  -6   2    2.83    0.67
  -9  -6   2    7.20    1.10
   8   6  -2    3.84    0.70
  -8  -6   2    4.10    0.79
   7   6  -2    6.16    0.57
  -7  -6   2    6.18    0.88
   6   6  -2    0.39    0.15
  -6  -6   2    0.29    0.31
   5   6  -2    0.40    0.22
  -5  -6   2    0.13    0.30
   4   6  -2    1.65    0.34
  -4  -6   2    1.49    0.43
   3   6  -2   34.07    1.36
  -3  -6   2   35.14    1.49
   2   6  -2   55.60    1.77
  -2  -6   2   55.67    1.88
   1   6  -2    6.25    0.57
  -1  -6   2    6.02    0.58
   0   6  -2    6.84    0.57
   0  -6   2    5.79    0.59
  -1   6  -2    4.77    0.50
   1  -6   2    4.31    0.49
  -2   6  -2    2.03    0.38
   2  -6   2    2.17    0.45
  -3   6  -2    8.89    0.67
   3  -6   2    7.99    0.70
   3  -6   2    7.92    0.70
  -4   6  -2    0.59    0.23
   4  -6   2    1.19    0.28
   4  -6   2    1.07    0.34
  -5   6  -2    0.51    0.15
  -5   6  -2    0.43    0.28
   5  -6   2    0.26    0.19
  -6   6  -2   10.28    0.88
  -6   6  -2   10.58    0.73
   6  -6   2    9.80    0.73
  -7   6  -2   -0.12    0.25
   7  -6   2    0.37    0.25
  -8   6  -2    5.55    0.86
   8  -6   2    6.75    0.67
  -9   6  -2    1.15    0.52
   9  -6   2    1.32    0.45
 -11  -5   2    0.90    0.51
 -10  -5   2    1.83    0.51
  -9  -5   2   12.70    1.11
  -8  -5   2    9.20    0.88
   7   5  -2    3.29    0.49
   7   5  -2    2.73    0.50
  -7  -5   2    1.89    0.49
   6   5  -2    0.13    0.15
   6   5  -2   -0.22    0.17
  -6  -5   2   -0.08    0.21
   5   5  -2    0.08    0.14
   5   5  -2   -0.07    0.15
  -5  -5   2   -0.02    0.22
   4   5  -2   22.62    0.76
   4   5  -2   23.11    1.01
  -4  -5   2   22.64    1.15
   3   5  -2    0.13    0.14
  -3  -5   2    0.44    0.22
   2   5  -2   66.16    1.84
  -2  -5   2   64.82    1.94
   1   5  -2    5.57    0.49
  -1  -5   2    5.94    0.54
   0   5  -2    0.93    0.23
   0  -5   2    0.81    0.24
  -1   5  -2   65.27    1.83
   1  -5   2   64.51    1.91
   1  -5   2   65.47    1.22
  -2   5  -2   36.11    1.29
   2  -5   2   37.61    1.41
   2  -5   2   37.34    0.96
  -3   5  -2   11.57    0.70
   3  -5   2   11.32    0.78
   3  -5   2   12.45    0.60
  -4   5  -2   29.49    1.28
  -4   5  -2   30.33    1.17
   4  -5   2   30.16    1.07
  -5   5  -2   15.50    0.96
  -5   5  -2   16.22    0.83
   5  -5   2   17.07    0.85
  -6   5  -2    4.32    0.42
  -6   5  -2    3.32    0.57
   6  -5   2    4.57    0.49
  -7   5  -2    0.64    0.27
   7  -5   2    0.83    0.29
  -8   5  -2   14.60    1.06
   8  -5   2   13.69    0.96
  -9   5  -2    1.46    0.54
   9  -5   2    1.70    0.51
  11   4  -2    2.69    0.64
 -11  -4   2    3.28    0.64
  10   4  -2    5.64    0.68
 -10  -4   2    6.78    0.81
   9   4  -2    3.80    0.65
  -9  -4   2    3.45    0.74
   8   4  -2    0.88    0.26
  -8  -4   2    0.59    0.40
   7   4  -2   -0.17    0.16
   7   4  -2    0.14    0.10
  -7  -4   2   -0.13    0.12
   6   4  -2   16.74    0.79
   6   4  -2   17.06    0.81
  -6  -4   2   16.88    1.03
   5   4  -2   10.51    0.56
   5   4  -2   10.69    0.63
  -5  -4   2   11.63    0.79
   4   4  -2   44.08    1.35
   4   4  -2   44.56    1.10
  -4  -4   2   44.71    1.58
   3   4  -2   79.79    1.97
   3   4  -2   79.74    1.47
  -3  -4   2   84.08    2.23
   2   4  -2    1.46    0.31
  -2  -4   2    1.30    0.29
   1   4  -2   19.14    0.83
  -1  -4   2   17.50    0.85
   0   4  -2   22.91    0.92
   0  -4   2   23.11    0.97
  -1   4  -2   51.72    1.46
   1  -4   2   48.70    1.51
   1  -4   2   49.83    0.97
  -2   4  -2   23.92    0.94
   2  -4   2   23.25    0.70
   2  -4   2   23.40    1.03
  -3   4  -2   87.76    2.06
  -3   4  -2   91.75    2.26
   3  -4   2   86.07    1.86
  -4   4  -2   32.74    1.12
  -4   4  -2   32.41    1.27
   4  -4   2   32.47    1.09
  -5   4  -2    2.36    0.42
  -5   4  -2    2.11    0.36
   5  -4   2    2.76    0.46
  -6   4  -2   37.49    1.52
  -6   4  -2   35.47    1.15
   6  -4   2   35.39    1.37
  -7   4  -2    0.47    0.16
   7  -4   2    0.33    0.19
  -8   4  -2    1.84    0.45
   8  -4   2    2.19    0.47
  -9   4  -2    3.65    0.72
   9  -4   2    2.76    0.59
 -10   4  -2   10.18    0.95
  10  -4   2   10.02    0.93
  11   3  -2    0.37    0.36
 -11  -3   2    0.65    0.52
  10   3  -2    1.60    0.49
 -10  -3   2    1.52    0.46
   9   3  -2    0.77    0.38
  -9  -3   2    0.94    0.28
   8   3  -2    5.61    0.56
  -8  -3   2    6.52    0.66
   7   3  -2    6.67    0.59
   7   3  -2    7.40    0.50
  -7  -3   2    7.14    0.68
   6   3  -2    1.82    0.34
   6   3  -2    2.02    0.33
  -6  -3   2    2.05    0.43
   5   3  -2    7.33    0.49
   5   3  -2    7.76    0.49
  -5  -3   2    7.55    0.61
   4   3  -2    0.01    0.08
   4   3  -2    0.05    0.09
  -4  -3   2    0.00    0.13
   3   3  -2   57.03    1.46
   3   3  -2   55.59    1.19
  -3  -3   2   59.56    1.68
   2   3  -2   82.27    1.38
   2   3  -2   81.56    1.85
  -2  -3   2   84.11    1.99
   1   3  -2  101.81    2.15
  -1  -3   2  103.54    2.26
   0   3  -2    9.29    0.51
   0  -3   2    9.09    0.53
  -1   3  -2    0.35    0.08
   1  -3   2    0.10    0.09
  -2   3  -2  102.21    2.12
  -2   3  -2  100.95    2.23
   2  -3   2  102.23    1.86
  -3   3  -2    0.41    0.15
  -3   3  -2    0.17    0.11
   3  -3   2    0.04    0.09
  -4   3  -2   26.55    1.08
  -4   3  -2   26.07    0.89
   4  -3   2   27.20    0.97
  -5   3  -2  114.95    2.29
  -5   3  -2  117.06    2.76
   5  -3   2  116.48    2.59
  -6   3  -2    1.54    0.38
  -6   3  -2    1.56    0.26
   6  -3   2    1.27    0.31
  -7   3  -2   21.39    1.16
   7  -3   2   18.83    1.04
  -8   3  -2    7.63    0.77
   8  -3   2    6.57    0.69
  -9   3  -2    1.47    0.56
   9  -3   2    1.13    0.47
 -10   3  -2    9.94    0.98
  10  -3   2   10.47    0.96
 -11   3  -2    4.55    0.87
  11  -3   2    6.32    0.94
  11   2  -2    0.07    0.34
 -11  -2   2    0.15    0.40
  10   2  -2    1.34    0.45
 -10  -2   2    1.21    0.43
   9   2  -2    2.66    0.52
  -9  -2   2    2.92    0.59
   8   2  -2   20.38    1.12
  -8  -2   2   19.96    1.17
   7   2  -2   57.34    1.47
   7   2  -2   57.56    1.80
  -7  -2   2   54.03    1.91
   6   2  -2    2.79    0.43
   6   2  -2    2.09    0.30
  -6  -2   2    2.40    0.46
   5   2  -2    1.76    0.31
   5   2  -2    1.49    0.25
  -5  -2   2    1.27    0.31
   4   2  -2    6.93    0.42
   4   2  -2    7.92    0.46
  -4  -2   2    7.92    0.55
   3   2  -2   40.62    1.09
   3   2  -2   40.92    1.00
  -3  -2   2   40.63    1.25
   2   2  -2   43.64    1.12
   2   2  -2   43.69    0.90
  -2  -2   2   44.03    1.24
   1   2  -2    0.33    0.12
   1   2  -2    0.37    0.05
  -1  -2   2    0.43    0.05
  -1  -2   2    0.23    0.13
   0   2  -2  247.63    4.08
   0  -2   2  255.34    4.20
  -1   2  -2  339.54    5.17
   1  -2   2  331.74    5.10
   1  -2   2  324.05    5.30
  -2   2  -2  184.88    3.33
  -2   2  -2  190.26    3.18
   2  -2   2  189.15    3.06
  -3   2  -2   26.48    0.95
  -3   2  -2   26.13    0.78
   3  -2   2   26.57    0.83
  -4   2  -2    5.46    0.34
  -4   2  -2    5.78    0.47
   4  -2   2    5.52    0.42
  -5   2  -2   47.39    1.12
  -5   2  -2   47.25    1.50
   5  -2   2   46.38    1.43
  -6   2  -2   22.45    0.70
  -6   2  -2   21.46    1.06
   6  -2   2   23.21    1.06
  -7   2  -2   86.13    2.46
   7  -2   2   90.47    2.47
  -8   2  -2    6.10    0.66
   8  -2   2    6.50    0.68
  -9   2  -2    2.48    0.53
   9  -2   2    2.21    0.57
 -10   2  -2    1.73    0.51
  10  -2   2    1.91    0.56
 -11   2  -2    0.07    0.35
  11  -2   2    0.25    0.37
  11   1  -2    0.79    0.32
 -11  -1   2    2.01    0.40
  10   1  -2    0.52    0.38
 -10  -1   2    0.61    0.37
   9   1  -2   19.40    1.17
  -9  -1   2   17.02    1.12
   8   1  -2    0.47    0.30
  -8  -1   2    1.32    0.35
   7   1  -2    0.77    0.22
  -7  -1   2    0.35    0.19
  -7  -1   2    0.08    0.15
   6   1  -2    7.65    0.59
   6   1  -2    7.64    0.44
  -6  -1   2    6.29    0.56
   5   1  -2   11.92    0.55
   5   1  -2   12.74    0.69
  -5  -1   2   11.29    0.70
   4   1  -2    0.20    0.10
   4   1  -2    0.19    0.16
  -4  -1   2    0.13    0.15
   3   1  -2   19.69    0.68
   3   1  -2   19.07    0.65
  -3  -1   2   19.66    0.77
   2   1  -2    7.24    0.32
   2   1  -2    6.92    0.36
  -2  -1   2    6.83    0.40
   1   1  -2    1.88    0.18
   1   1  -2    2.03    0.14
  -1  -1   2    1.89    0.19
   0   1  -2  272.78    4.05
   0   1  -2  295.13    4.31
   0  -1   2  281.69    4.36
   0  -1   2  269.47    4.08
  -1   1  -2  910.33   14.76
  -1   1  -2 1000.00   14.57
   1  -1   2  970.49   14.07
  -2   1  -2   11.31    0.50
  -2   1  -2   11.44    0.43
   2  -1   2   12.08    0.43
  -3   1  -2   37.19    1.08
  -3   1  -2   39.35    0.88
   3  -1   2   37.53    1.00
  -4   1  -2   34.32    1.11
  -4   1  -2   34.72    0.81
   4  -1   2   34.60    1.07
  -5   1  -2    2.75    0.33
  -5   1  -2    2.92    0.20
   5  -1   2    2.95    0.42
  -6   1  -2    4.69    0.47
  -6   1  -2    4.17    0.22
   6  -1   2    5.17    0.48
  -7   1  -2    0.08    0.16
   7  -1   2   -0.13    0.16
  -8   1  -2    3.80    0.60
   8  -1   2    3.35    0.60
  -9   1  -2    0.09    0.15
   9  -1   2   -0.18    0.17
 -10   1  -2    1.01    0.40
  10  -1   2    0.69    0.34
 -11   1  -2    2.90    0.68
  11  -1   2    3.62    0.72
 -12   1  -2    1.25    0.49
  12  -1   2    1.63    0.53
  11   0  -2    6.60    0.96
 -11   0   2    7.22    0.75
  10   0  -2    0.92    0.46
 -10   0   2    0.97    0.33
   9   0  -2    8.98    0.83
  -9   0   2    8.45    0.76
   8   0  -2    9.51    0.82
  -8   0   2    9.61    0.82
   7   0  -2    0.14    0.16
  -7   0   2    0.28    0.25
   6   0  -2    3.66    0.43
  -6   0   2    4.52    0.45
  -6   0   2    3.94    0.35
   5   0  -2    8.09    0.57
  -5   0   2    7.21    0.52
  -5   0   2    7.69    0.43
   4   0  -2    0.26    0.08
   4   0  -2    0.19    0.15
  -4   0   2    0.17    0.09
   3   0  -2   38.41    0.96
   3   0  -2   37.67    1.05
  -3   0   2   37.88    1.06
   2   0  -2   26.70    0.73
   2   0  -2   25.75    0.72
  -2   0   2   26.80    0.77
   1   0  -2   91.44    1.68
   1   0  -2   95.21    1.65
  -1   0   2   95.74    1.68
   0   0  -2  108.95    1.82
   0   0  -2  104.73    1.73
   0   0   2  105.90    1.78
  -1   0  -2  449.29    6.63
  -1   0  -2  412.96    6.41
  -1   0  -2  399.30    6.25
  -2   0  -2   62.41    1.12
  -2   0  -2   61.66    1.29
   2   0   2   64.61    1.26
  -3   0  -2    8.64    0.44
  -3   0  -2    9.08    0.29
   3   0   2    9.50    0.44
  -4   0  -2    4.10    0.34
  -4   0  -2    3.94    0.17
   4   0   2    4.12    0.20
   4   0   2    3.91    0.33
  -5   0  -2   35.46    1.18
  -5   0  -2   36.18    0.61
   5   0   2   34.96    1.17
   5   0   2   35.55    0.61
  -6   0  -2   52.38    1.61
   6   0   2   54.18    1.64
  -7   0  -2    1.01    0.29
   7   0   2    0.82    0.27
  -8   0  -2    6.41    0.62
   8   0   2    6.65    0.65
  -9   0  -2   19.83    1.14
   9   0   2   17.86    1.14
 -10   0  -2    3.96    0.68
  10   0   2    4.53    0.81
 -11   0  -2    8.06    0.80
  11   0   2    6.45    0.76
 -12   0  -2    2.79    0.69
  12   0   2    2.35    0.61
  11  -1  -2    0.64    0.33
 -11   1   2    1.34    0.37
  10  -1  -2    5.00    0.88
 -10   1   2    5.68    0.81
   9  -1  -2    4.08    0.67
  -9   1   2    2.80    0.56
   8  -1  -2    4.94    0.75
  -8   1   2    4.43    0.52
   7  -1  -2   52.11    1.84
  -7   1   2   53.21    1.73
   6  -1  -2   33.67    1.33
  -6   1   2   33.28    1.25
  -6   1   2   32.64    0.98
   5  -1  -2    0.60    0.19
  -5   1   2   -0.10    0.08
  -5   1   2    0.15    0.13
   4  -1  -2   19.23    0.83
  -4   1   2   18.53    0.66
  -4   1   2   18.43    0.74
   3  -1  -2   35.31    1.05
  -3   1   2   35.78    0.97
  -3   1   2   37.08    0.95
  -2   1   2    1.74    0.16
  -2   1   2    1.74    0.17
   1  -1  -2  205.19    3.39
   1  -1  -2  219.69    3.36
  -1   1   2  216.44    3.20
   0  -1  -2  390.73    5.80
   0  -1  -2  386.00    5.88
   0  -1  -2  406.79    5.85
   0   1   2  411.65    5.82
  -1  -1  -2    6.65    0.23
  -1  -1  -2    6.22    0.26
  -1  -1  -2    6.24    0.29
   1   1   2    6.31    0.22
  -2  -1  -2   21.31    0.63
  -2  -1  -2   20.93    0.58
  -2  -1  -2   22.31    0.51
  -3  -1  -2    0.78    0.15
   3   1   2    0.76    0.16
   3   1   2    0.87    0.07
   3   1   2    0.91    0.08
  -4  -1  -2    6.36    0.41
   4   1   2    6.57    0.41
   4   1   2    6.70    0.14
  -5  -1  -2    5.54    0.43
   5   1   2    6.52    0.47
  -6  -1  -2   40.57    1.35
   6   1   2   42.31    1.39
  -7  -1  -2  101.74    2.57
   7   1   2   97.88    2.54
  -8  -1  -2   14.42    0.90
   8   1   2   13.98    0.92
  -9  -1  -2   14.30    0.98
   9   1   2   14.67    0.99
 -10  -1  -2    3.01    0.60
  10   1   2    2.57    0.54
 -11  -1  -2    0.23    0.26
  11   1   2   -0.52    0.18
 -12  -1  -2    1.95    0.53
  12   1   2    0.67    0.57
  11  -2  -2    3.83    0.78
 -11   2   2    3.82    0.64
  10  -2  -2    2.09    0.61
 -10   2   2    2.52    0.48
   9  -2  -2    0.10    0.19
  -9   2   2   -0.14    0.20
   8  -2  -2    5.48    0.61
  -8   2   2    5.01    0.56
   7  -2  -2    3.08    0.58
  -7   2   2    2.78    0.45
   6  -2  -2    3.17    0.53
  -6   2   2    3.93    0.39
  -6   2   2    2.81    0.32
   5  -2  -2   15.84    0.83
  -5   2   2   16.13    0.65
  -5   2   2   15.01    0.73
   4  -2  -2   53.78    1.53
  -4   2   2   55.84    1.32
  -4   2   2   54.87    1.39
   3  -2  -2    9.24    0.53
  -3   2   2    9.56    0.47
  -3   2   2    9.40    0.44
   2  -2  -2    6.37    0.40
  -2   2   2    6.15    0.36
  -2   2   2    6.27    0.30
   1  -2  -2  255.15    4.12
   1  -2  -2  255.88    3.90
  -1   2   2  260.66    4.05
  -1   2   2  259.58    3.80
   0  -2  -2   37.87    0.91
   0   2   2   38.31    0.90
  -1  -2  -2  299.92    4.70
  -1  -2  -2  317.30    4.58
   1   2   2  307.36    4.61
   1   2   2  307.57    4.38
  -2  -2  -2  361.70    5.27
  -2  -2  -2  358.18    5.49
   2   2   2  354.94    5.29
  -3  -2  -2  221.85    3.74
  -3  -2  -2  226.95    3.63
   3   2   2  223.14    3.33
  -4  -2  -2    1.31    0.12
   4   2   2    1.25    0.24
   4   2   2    1.35    0.10
  -5  -2  -2  267.60    4.58
   5   2   2  263.85    3.65
   5   2   2  252.22    4.57
   5   2   2  269.50    3.66
  -6  -2  -2   11.21    0.69
   6   2   2   11.91    0.69
  -7  -2  -2   14.12    0.83
   7   2   2   13.70    0.81
  -8  -2  -2   83.23    2.38
   8   2   2   86.03    2.44
  -9  -2  -2    1.61    0.40
   9   2   2    2.00    0.51
 -10  -2  -2    0.21    0.25
  10   2   2    0.08    0.24
 -11  -2  -2    6.81    0.80
  11   2   2    7.87    0.83
 -12  -2  -2    8.11    1.11
  12   2   2    5.08    0.93
  10  -3  -2   11.40    1.03
 -10   3   2   12.04    1.00
   9  -3  -2    8.77    0.88
  -9   3   2    9.53    0.86
   8  -3  -2   12.68    1.00
  -8   3   2   13.41    0.88
   7  -3  -2    0.85    0.35
  -7   3   2    0.67    0.26
   6  -3  -2    2.06    0.43
  -6   3   2    1.57    0.27
  -6   3   2    1.52    0.33
   5  -3  -2    4.78    0.48
  -5   3   2    3.08    0.34
  -5   3   2    3.87    0.38
   4  -3  -2   44.26    1.43
  -4   3   2   44.25    1.20
  -4   3   2   43.33    1.23
   3  -3  -2   74.53    1.83
  -3   3   2   74.59    1.65
  -3   3   2   72.39    1.59
   2  -3  -2   67.73    1.61
  -2   3   2   69.41    1.39
  -2   3   2   68.51    1.54
   1  -3  -2    9.24    0.46
  -1   3   2    9.11    0.33
  -1   3   2    8.40    0.44
   0  -3  -2  220.96    3.23
   0  -3  -2  215.65    3.59
   0   3   2  216.64    3.56
  -1  -3  -2   38.99    0.97
  -1  -3  -2   39.63    0.80
   1   3   2   39.95    0.98
  -2  -3  -2   14.27    0.49
  -2  -3  -2   15.05    0.56
   2   3   2   15.42    0.53
  -3  -3  -2    3.63    0.28
  -3  -3  -2    3.13    0.27
   3   3   2    3.51    0.22
  -4  -3  -2  434.07    6.56
   4   3   2  414.82    6.56
   4   3   2  397.08    6.04
  -5  -3  -2    3.52    0.37
   5   3   2    3.62    0.36
   5   3   2    3.43    0.20
  -6  -3  -2   48.57    1.52
   6   3   2   48.66    0.90
   6   3   2   47.89    1.50
  -7  -3  -2   20.27    1.00
   7   3   2   20.00    0.97
  -8  -3  -2    3.43    0.52
   8   3   2    3.80    0.43
  -9  -3  -2    5.09    0.58
   9   3   2    5.63    0.63
 -10  -3  -2   30.48    1.55
  10   3   2   31.53    1.56
 -11  -3  -2   10.08    0.91
  11   3   2    9.26    0.92
 -12  -3  -2    0.78    0.31
  12   3   2    0.38    0.43
  10  -4  -2    1.84    0.49
 -10   4   2    1.66    0.54
   9  -4  -2    3.94    0.78
  -9   4   2    4.68    0.72
   8  -4  -2    6.79    0.77
  -8   4   2    7.76    0.67
   7  -4  -2    2.09    0.53
  -7   4   2    1.51    0.39
   6  -4  -2   14.38    0.94
  -6   4   2   13.68    0.79
  -6   4   2   13.71    0.68
   5  -4  -2    1.11    0.34
  -5   4   2    0.34    0.18
  -5   4   2    1.08    0.28
   4  -4  -2    9.80    0.66
  -4   4   2   10.73    0.59
  -4   4   2   10.93    0.61
   3  -4  -2    0.01    0.13
  -3   4   2    0.15    0.11
  -3   4   2    0.02    0.12
   2  -4  -2   15.66    0.71
  -2   4   2   15.93    0.59
  -2   4   2   14.88    0.66
   1  -4  -2  106.61    2.19
  -1   4   2  104.98    1.90
  -1   4   2  107.05    2.17
   0  -4  -2   24.10    0.80
   0  -4  -2   24.90    0.67
   0   4   2   25.08    0.83
  -1  -4  -2   -0.06    0.08
  -1  -4  -2    0.01    0.05
   1   4   2    0.64    0.17
  -2  -4  -2   57.80    1.35
  -2  -4  -2   56.60    1.27
   2   4   2   58.25    1.35
  -3  -4  -2   73.04    1.65
  -3  -4  -2   72.25    1.62
   3   4   2   75.97    1.58
  -4  -4  -2   31.87    1.04
  -4  -4  -2   30.59    1.00
   4   4   2   32.37    0.88
  -5  -4  -2    6.15    0.48
   5   4   2    6.24    0.47
   5   4   2    6.41    0.35
  -6  -4  -2    6.39    0.54
   6   4   2    7.61    0.37
   6   4   2    7.37    0.56
  -7  -4  -2    3.34    0.50
   7   4   2    3.90    0.24
   7   4   2    3.71    0.43
  -8  -4  -2   11.65    0.83
   8   4   2   10.91    0.76
  -9  -4  -2   23.22    1.29
   9   4   2   22.43    1.22
 -10  -4  -2    0.11    0.30
  10   4   2   -0.04    0.24
 -11  -4  -2    6.21    0.72
  11   4   2    6.39    0.78
 -12  -4  -2    5.63    0.91
  12   4   2    7.44    0.84
  10  -5  -2    1.34    0.60
 -10   5   2    2.00    0.69
   9  -5  -2    5.40    0.94
  -9   5   2    4.59    0.77
   8  -5  -2    1.08    0.47
  -8   5   2    0.07    0.29
   7  -5  -2    4.27    0.73
  -7   5   2    3.37    0.59
   6  -5  -2    0.41    0.29
  -6   5   2    0.33    0.23
  -6   5   2    0.42    0.20
   5  -5  -2    0.59    0.27
  -5   5   2    0.14    0.15
  -5   5   2    0.56    0.21
   4  -5  -2   88.65    2.33
  -4   5   2   85.88    2.05
  -4   5   2   84.28    2.06
   3  -5  -2    5.98    0.50
  -3   5   2    5.13    0.43
  -3   5   2    4.93    0.38
   2  -5  -2    2.60    0.39
  -2   5   2    2.65    0.38
  -2   5   2    2.26    0.24
   1  -5  -2    0.15    0.11
   1  -5  -2    0.20    0.12
  -1   5   2    0.03    0.11
   0  -5  -2   13.34    0.62
   0  -5  -2   13.80    0.56
   0   5   2   12.80    0.65
  -1  -5  -2    3.97    0.32
  -1  -5  -2    4.12    0.31
   1   5   2    4.19    0.34
  -2  -5  -2   13.47    0.58
  -2  -5  -2   12.27    0.57
   2   5   2   13.92    0.65
  -3  -5  -2   70.80    1.64
  -3  -5  -2   71.51    1.71
   3   5   2   71.86    1.67
  -4  -5  -2   25.80    0.98
  -4  -5  -2   27.35    0.96
   4   5   2   27.21    0.90
  -5  -5  -2    3.04    0.45
   5   5   2    3.12    0.35
   5   5   2    3.24    0.30
  -6  -5  -2    9.31    0.69
   6   5   2    9.71    0.50
   6   5   2   10.49    0.66
  -7  -5  -2   36.56    1.48
   7   5   2   37.93    1.40
   7   5   2   37.89    1.02
  -8  -5  -2    0.93    0.27
   8   5   2    0.99    0.22
  -9  -5  -2   10.25    0.84
   9   5   2    9.59    0.79
 -10  -5  -2    9.70    0.85
  10   5   2    7.46    0.77
 -11  -5  -2    0.24    0.34
  11   5   2    0.05    0.36
 -12  -5  -2   -0.02    0.37
  12   5   2   -0.21    0.37
   9  -6  -2   14.75    1.22
   8  -6  -2    4.37    0.79
  -8   6   2    4.89    0.72
   7  -6  -2    0.26    0.28
  -7   6   2    0.48    0.22
   6  -6  -2   -0.02    0.23
  -6   6   2    0.19    0.25
  -6   6   2   -0.05    0.19
   5  -6  -2   21.43    1.14
  -5   6   2   21.97    1.02
  -5   6   2   22.03    1.01
   4  -6  -2   27.18    1.21
  -4   6   2   26.71    1.06
  -4   6   2   27.26    1.14
   3  -6  -2   10.74    0.73
  -3   6   2   11.95    0.64
  -3   6   2   12.35    0.72
   2  -6  -2   25.18    1.04
   2  -6  -2   25.66    0.95
  -2   6   2   25.20    1.05
   1  -6  -2    6.31    0.47
   1  -6  -2    6.43    0.42
  -1   6   2    6.69    0.51
   0  -6  -2    7.25    0.49
   0  -6  -2    8.45    0.48
   0   6   2    7.35    0.54
  -1  -6  -2    5.33    0.40
  -1  -6  -2    5.25    0.39
   1   6   2    5.53    0.46
  -2  -6  -2    3.54    0.33
  -2  -6  -2    3.28    0.30
   2   6   2    3.21    0.35
  -3  -6  -2    5.06    0.41
  -3  -6  -2    4.38    0.35
   3   6   2    4.24    0.40
  -4  -6  -2    5.33    0.43
  -4  -6  -2    4.79    0.44
   4   6   2    5.45    0.44
  -5  -6  -2   13.26    0.78
   5   6   2   13.70    0.69
   5   6   2   13.79    0.71
  -6  -6  -2    0.31    0.12
   6   6   2    0.06    0.13
   6   6   2    0.65    0.23
  -7  -6  -2    5.77    0.62
   7   6   2    6.89    0.45
   7   6   2    6.61    0.55
  -8  -6  -2    0.66    0.29
   8   6   2    0.20    0.15
  -9  -6  -2    2.54    0.59
   9   6   2    2.12    0.46
 -10  -6  -2   27.83    1.54
  10   6   2   28.33    1.44
 -11  -6  -2    6.97    0.76
  11   6   2    6.06    0.73
 -12  -6  -2    0.56    0.28
   8  -7  -2    8.38    0.87
   7  -7  -2    5.77    0.67
  -7   7   2    5.28    0.62
   6  -7  -2    1.23    0.33
  -6   7   2    1.41    0.36
  -6   7   2    1.08    0.42
   5  -7  -2   41.80    1.72
  -5   7   2   43.91    1.55
  -5   7   2   44.67    1.61
   4  -7  -2    1.25    0.36
  -4   7   2    1.10    0.30
  -4   7   2    2.23    0.37
   3  -7  -2    1.64    0.36
   3  -7  -2    2.07    0.44
  -3   7   2    1.77    0.39
   2  -7  -2    2.57    0.42
   2  -7  -2    3.07    0.47
  -2   7   2    2.92    0.44
   1  -7  -2    7.47    0.54
   1  -7  -2    7.66    0.55
  -1   7   2    8.70    0.62
   0  -7  -2    0.01    0.16
   0  -7  -2    0.08    0.09
   0   7   2    0.47    0.17
  -1  -7  -2   -0.03    0.06
  -1  -7  -2    0.22    0.15
   1   7   2   -0.11    0.15
  -2  -7  -2    0.87    0.27
  -2  -7  -2    0.55    0.19
   2   7   2    0.79    0.21
  -3  -7  -2    4.08    0.45
  -3  -7  -2    4.18    0.36
   3   7   2    4.26    0.44
  -4  -7  -2   12.13    0.77
  -4  -7  -2   12.08    0.65
   4   7   2   13.96    0.76
  -5  -7  -2   64.88    1.98
   5   7   2   63.46    1.78
   5   7   2   64.62    1.71
  -6  -7  -2   22.40    1.15
   6   7   2   22.14    0.96
   6   7   2   23.30    0.99
  -7  -7  -2    0.69    0.32
   7   7   2    0.38    0.23
   7   7   2    0.15    0.14
  -8  -7  -2    9.05    0.80
   8   7   2    8.06    0.56
   8   7   2    7.91    0.64
  -9  -7  -2   24.14    1.42
   9   7   2   24.90    1.26
 -10  -7  -2    0.30    0.32
  10   7   2    0.68    0.35
 -11  -7  -2    0.48    0.43
  11   7   2    0.86    0.35
 -12  -7  -2    9.49    1.05
  12   7   2    8.79    0.97
   7  -8  -2    3.15    0.71
   6  -8  -2   17.57    1.14
  -6   8   2   16.54    1.05
   5  -8  -2    1.02    0.30
  -5   8   2    0.80    0.31
   4  -8  -2   -0.02    0.18
   4  -8  -2    0.79    0.26
  -4   8   2    0.44    0.34
   3  -8  -2    8.51    0.69
   3  -8  -2    8.43    0.65
  -3   8   2   10.41    0.76
   2  -8  -2    1.33    0.35
   2  -8  -2    0.73    0.27
  -2   8   2    0.49    0.27
   1  -8  -2    0.50    0.21
   1  -8  -2    0.60    0.21
  -1   8   2    0.04    0.22
   0  -8  -2   28.78    1.10
   0  -8  -2   28.91    1.15
   0   8   2   29.15    1.28
  -1  -8  -2   24.89    0.98
  -1  -8  -2   23.71    1.03
   1   8   2   23.49    1.14
  -2  -8  -2    0.08    0.10
  -2  -8  -2    0.30    0.14
   2   8   2    0.31    0.23
  -3  -8  -2   29.88    1.04
  -3  -8  -2   29.34    1.22
   3   8   2   29.03    1.26
  -4  -8  -2   10.93    0.65
  -4  -8  -2   12.33    0.81
   4   8   2   12.52    0.80
  -5  -8  -2    1.42    0.32
   5   8   2    1.86    0.36
   5   8   2    1.31    0.27
  -6  -8  -2    2.47    0.51
   6   8   2    2.78    0.42
   6   8   2    2.53    0.47
  -7  -8  -2   30.18    1.49
   7   8   2   30.02    1.23
   7   8   2   32.70    1.28
  -8  -8  -2   18.93    1.26
   8   8   2   19.44    1.01
   8   8   2   18.45    0.92
  -9  -8  -2    6.23    0.92
   9   8   2    6.70    0.65
 -10  -8  -2    7.81    0.92
  10   8   2    7.82    0.90
 -11  -8  -2    5.01    0.91
   6  -9  -2    1.07    0.34
   5  -9  -2    0.63    0.33
  -5   9   2    0.42    0.28
   4  -9  -2    0.32    0.24
   4  -9  -2    0.16    0.16
  -4   9   2   -0.12    0.27
   3  -9  -2    1.13    0.30
   3  -9  -2    1.02    0.35
  -3   9   2    0.33    0.27
   2  -9  -2    6.93    0.62
   2  -9  -2    7.14    0.61
  -2   9   2    7.48    0.72
   1  -9  -2    3.65    0.42
   1  -9  -2    3.97    0.48
  -1   9   2    4.44    0.65
   0  -9  -2    4.10    0.47
   0  -9  -2    5.26    0.47
   0   9   2    5.24    0.56
  -1  -9  -2   14.68    0.86
  -1  -9  -2   14.44    0.75
   1   9   2   14.40    0.93
  -2  -9  -2    9.13    0.71
  -2  -9  -2   10.89    0.64
   2   9   2   10.28    0.79
  -3  -9  -2    0.60    0.24
   3   9   2    0.28    0.20
  -4  -9  -2    3.14    0.53
   4   9   2    3.71    0.58
  -5  -9  -2   10.62    0.80
   5   9   2   10.47    0.79
  -6  -9  -2    9.56    0.81
   6   9   2    8.69    0.70
  -7  -9  -2    7.63    0.79
   7   9   2    7.34    0.65
  -8  -9  -2    3.52    0.72
   8   9   2    3.05    0.53
  -9  -9  -2    7.00    1.03
 -10  -9  -2    0.32    0.23
  -5  10   2    0.28    0.37
  -4  10   2    5.31    0.80
  -3  10   2    6.37    0.90
   2 -10  -2    2.55    0.51
  -2  10   2    2.13    0.47
   1 -10  -2   25.43    1.26
  -1  10   2   25.41    1.38
   0 -10  -2   17.67    1.03
   0  10   2   17.36    1.15
  -1 -10  -2    0.31    0.19
   1  10   2    0.35    0.38
  -2 -10  -2    2.72    0.47
   2  10   2    2.10    0.45
  -3 -10  -2    3.14    0.52
   3  10   2    3.44    0.57
  -4 -10  -2    5.64    0.63
   4  10   2    5.15    0.60
  -5 -10  -2    1.56    0.37
   5  10   2    1.09    0.39
  -6 -10  -2   14.36    1.07
   6  10   2   14.40    0.98
  -7 -10  -2   16.13    1.16
   7  10   2   16.59    1.00
  -8 -10  -2    8.03    0.87
   8  10   2    8.33    0.73
  -9 -10  -2    4.94    0.89
 -10 -10  -2    0.59    0.28
  -3  11   2    0.19    0.37
  -2  11   2    1.52    0.46
  -1  11   2    0.29    0.40
   0 -11  -2    5.76    0.67
   0  11   2    6.75    0.92
  -1 -11  -2    2.36    0.50
   1  11   2    1.70    0.42
  -2 -11  -2   -0.23    0.20
   2  11   2   -0.22    0.19
  -3 -11  -2    0.84    0.34
   3  11   2    0.49    0.30
  -4 -11  -2    0.07    0.24
   4  11   2    0.37    0.24
  -5 -11  -2    1.92    0.48
   5  11   2    1.18    0.39
  -6 -11  -2    6.39    0.96
   6  11   2    6.60    0.72
  -7 -11  -2    0.52    0.52
   7  11   2    1.02    0.24
  -8 -11  -2    6.38    1.03
   8  11   2    7.71    0.72
  -1  12   2    1.06    0.49
   0  12   2    1.53    0.50
   1  12   2   -0.39    0.30
  -2 -12  -2    1.25    0.53
   2  12   2    1.49    0.37
  -3 -12  -2    5.32    0.84
   3  12   2    4.43    0.86
  -4 -12  -2   -0.42    0.20
   4  12   2    0.78    0.38
  -5 -12  -2    9.83    0.90
   5  12   2    9.44    0.96
  -6 -12  -2    0.04    0.31
   6  12   2    1.03    0.29
  -7 -12  -2    1.37    0.54
   4  10  -3    8.84    0.92
  -4 -10   3   10.35    1.12
   3  10  -3    9.95    0.95
  -3 -10   3    9.10    1.04
   2  10  -3    0.07    0.37
  -2 -10   3   -0.48    0.21
   1  10  -3    0.73    0.33
  -1 -10   3    1.12    0.38
   0  10  -3    3.68    0.77
   0 -10   3    3.81    0.74
  -1  10  -3    1.05    0.41
   1 -10   3    1.96    0.52
   6   9  -3    1.20    0.36
  -6  -9   3    1.18    0.48
   5   9  -3    0.99    0.34
  -5  -9   3    1.68    0.59
   4   9  -3    2.54    0.61
  -4  -9   3    2.62    0.68
   3   9  -3    4.96    0.76
  -3  -9   3    4.79    0.83
   2   9  -3    1.90    0.45
  -2  -9   3    1.70    0.40
   1   9  -3    3.11    0.67
  -1  -9   3    3.92    0.74
   0   9  -3   40.69    1.86
   0  -9   3   38.53    1.92
  -1   9  -3    1.22    0.48
   1  -9   3    1.18    0.49
  -2   9  -3    0.57    0.47
   2  -9   3    0.33    0.32
  -3   9  -3    3.17    0.69
   3  -9   3    4.35    0.73
  -4   9  -3    1.41    0.54
   4  -9   3    0.74    0.43
  -8  -8   3    1.92    0.64
   7   8  -3    0.54    0.27
  -7  -8   3    0.16    0.39
   6   8  -3    7.33    0.76
  -6  -8   3    7.72    0.87
   5   8  -3   12.82    0.97
  -5  -8   3   11.51    1.09
   4   8  -3   16.82    1.12
  -4  -8   3   15.90    1.23
   3   8  -3    0.86    0.33
  -3  -8   3    0.48    0.35
   2   8  -3    1.79    0.47
  -2  -8   3    2.22    0.56
   1   8  -3   12.46    0.97
  -1  -8   3   13.92    1.06
   0   8  -3   13.21    1.01
   0  -8   3   13.56    1.06
  -1   8  -3   21.07    1.28
   1  -8   3   20.98    1.31
  -2   8  -3   20.65    1.25
   2  -8   3   19.60    1.27
  -3   8  -3    3.68    0.67
   3  -8   3    4.85    0.74
   4  -8   3    0.25    0.24
  -5   8  -3    7.99    0.78
   5  -8   3    8.95    0.90
   6  -8   3    4.12    0.83
  -9  -7   3    5.47    1.04
  -8  -7   3    0.19    0.33
  -7  -7   3    0.44    0.29
   6   7  -3    5.25    0.61
  -6  -7   3    5.50    0.90
   5   7  -3    0.52    0.25
  -5  -7   3    1.09    0.35
   4   7  -3    5.66    0.63
  -4  -7   3    4.25    0.72
   3   7  -3   13.32    0.93
  -3  -7   3   14.88    1.06
   2   7  -3    9.07    0.78
  -2  -7   3    9.26    0.86
   1   7  -3    3.38    0.56
  -1  -7   3    2.70    0.58
   0   7  -3    6.04    0.65
   0  -7   3    6.05    0.70
  -1   7  -3    7.68    0.70
   1  -7   3    6.60    0.72
  -2   7  -3    0.97    0.21
   2  -7   3    0.22    0.13
  -3   7  -3    7.27    0.67
   3  -7   3    8.23    0.76
  -4   7  -3   32.28    1.44
   4  -7   3   31.62    1.62
  -5   7  -3   -0.22    0.24
   5  -7   3    0.35    0.28
   6  -7   3    5.01    0.87
   7  -7   3    0.17    0.43
  -9  -6   3   14.16    1.21
  -8  -6   3    3.39    0.76
   7   6  -3    2.25    0.50
  -7  -6   3    3.31    0.71
   6   6  -3    2.28    0.44
  -6  -6   3    2.77    0.57
   5   6  -3    1.23    0.33
  -5  -6   3    1.51    0.44
   4   6  -3   14.69    0.91
  -4  -6   3   12.78    1.00
   3   6  -3    0.01    0.09
  -3  -6   3    0.22    0.18
   2   6  -3    5.50    0.55
  -2  -6   3    5.16    0.58
   1   6  -3   51.19    1.80
  -1  -6   3   53.52    1.93
   0   6  -3   29.64    1.32
   0  -6   3   30.79    1.42
  -1   6  -3    8.69    0.68
   1  -6   3    8.26    0.73
  -2   6  -3   14.16    0.89
   2  -6   3   14.17    0.97
  -3   6  -3    3.89    0.60
   3  -6   3    5.40    0.78
  -4   6  -3   16.42    0.92
   4  -6   3   14.75    1.05
  -5   6  -3   16.41    0.96
   5  -6   3   16.65    1.15
  -6   6  -3   10.31    0.92
  -6   6  -3   11.13    0.91
  -7   6  -3    1.36    0.38
  -8   6  -3    0.89    0.34
 -10  -5   3   11.83    1.21
  -9  -5   3    0.27    0.30
  -8  -5   3    0.75    0.35
   7   5  -3   13.17    0.85
  -7  -5   3   11.56    0.97
   6   5  -3    5.12    0.55
  -6  -5   3    6.22    0.86
   5   5  -3    4.14    0.58
  -5  -5   3    2.55    0.58
   4   5  -3   42.39    1.50
  -4  -5   3   40.92    1.69
   3   5  -3    5.24    0.51
  -3  -5   3    5.48    0.59
   2   5  -3   11.72    0.76
  -2  -5   3   13.36    0.88
   1   5  -3   15.07    0.87
  -1  -5   3   16.45    0.96
   0   5  -3   42.55    1.50
   0  -5   3   44.48    1.63
  -1   5  -3   16.54    0.87
   1  -5   3   16.42    0.96
  -2   5  -3    0.69    0.24
   2  -5   3    1.09    0.29
  -3   5  -3   14.25    0.81
   3  -5   3   13.45    0.60
   3  -5   3   15.34    0.95
  -4   5  -3    0.10    0.17
  -4   5  -3    0.13    0.18
   4  -5   3    0.19    0.16
  -5   5  -3    0.77    0.24
  -5   5  -3    0.29    0.20
   5  -5   3    0.32    0.16
  -6   5  -3    0.47    0.23
  -6   5  -3    0.32    0.24
   6  -5   3    0.25    0.21
  -7   5  -3    0.17    0.21
   7  -5   3   -0.06    0.21
  -8   5  -3    5.67    0.66
   8  -5   3    4.31    0.67
  -9   5  -3    0.43    0.44
   9  -5   3    1.08    0.37
 -10  -4   3    9.98    0.98
  -9  -4   3    6.84    0.81
   8   4  -3    0.84    0.36
  -8  -4   3    0.67    0.38
   7   4  -3    0.80    0.23
   7   4  -3    0.33    0.19
  -7  -4   3    0.06    0.30
   6   4  -3    3.05    0.41
   6   4  -3    3.15    0.47
  -6  -4   3    2.97    0.57
   5   4  -3   92.98    1.99
   5   4  -3   93.94    2.32
  -5  -4   3   94.63    2.65
   4   4  -3    6.34    0.53
   4   4  -3    6.77    0.38
  -4  -4   3    7.88    0.64
   3   4  -3    8.20    0.32
   3   4  -3    7.90    0.58
  -3  -4   3    8.46    0.67
   2   4  -3   25.04    1.05
  -2  -4   3   25.91    1.13
   1   4  -3    2.61    0.41
  -1  -4   3    1.69    0.36
   0   4  -3    4.93    0.46
   0  -4   3    5.32    0.48
  -1   4  -3    1.05    0.29
   1  -4   3    1.44    0.31
  -2   4  -3    1.61    0.33
   2  -4   3    1.19    0.32
   2  -4   3    1.52    0.19
  -3   4  -3    8.15    0.57
  -3   4  -3    8.43    0.65
   3  -4   3    8.25    0.45
  -4   4  -3   59.85    1.90
  -4   4  -3   58.87    1.65
   4  -4   3   61.58    1.56
  -5   4  -3   26.33    1.25
  -5   4  -3   26.58    1.05
   5  -4   3   27.14    1.06
  -6   4  -3    4.41    0.65
  -6   4  -3    3.36    0.38
   6  -4   3    3.64    0.55
  -7   4  -3    9.80    0.82
   7  -4   3    8.24    0.71
  -8   4  -3    2.67    0.57
   8  -4   3    2.85    0.56
  -9   4  -3    1.80    0.61
   9  -4   3    2.08    0.57
 -10   4  -3   10.25    1.04
  10  -4   3   10.43    0.97
  11   3  -3    8.57    0.89
 -11  -3   3    8.62    0.90
  10   3  -3    1.32    0.44
 -10  -3   3    1.23    0.52
   9   3  -3    0.72    0.26
  -9  -3   3    0.62    0.36
   8   3  -3   27.97    1.26
  -8  -3   3   25.68    1.44
   7   3  -3    2.02    0.36
   7   3  -3    1.70    0.37
  -7  -3   3    1.74    0.43
   6   3  -3   34.88    1.22
   6   3  -3   35.47    1.26
  -6  -3   3   34.07    1.48
   5   3  -3   20.48    0.91
   5   3  -3   19.87    0.80
  -5  -3   3   20.63    1.08
   4   3  -3   -0.02    0.10
   4   3  -3    0.25    0.13
  -4  -3   3   -0.04    0.17
   3   3  -3    2.40    0.22
   3   3  -3    2.33    0.36
  -3  -3   3    2.18    0.41
   2   3  -3    6.88    0.26
   2   3  -3    6.50    0.47
  -2  -3   3    6.43    0.52
   1   3  -3   98.33    2.22
  -1  -3   3  100.22    2.33
   0   3  -3   35.28    1.16
   0  -3   3   37.16    1.25
  -1   3  -3   25.79    0.96
   1  -3   3   26.15    0.53
   1  -3   3   26.20    0.54
   1  -3   3   24.42    1.01
  -2   3  -3   10.54    0.59
   2  -3   3   11.34    0.68
   2  -3   3   10.84    0.42
  -3   3  -3   85.44    2.17
  -3   3  -3   88.07    2.01
   3  -3   3   88.67    1.82
  -4   3  -3    3.91    0.37
  -4   3  -3    3.63    0.41
   4  -3   3    3.82    0.37
  -5   3  -3   68.19    2.03
  -5   3  -3   67.13    1.67
   5  -3   3   68.65    1.82
  -6   3  -3   42.31    1.23
  -6   3  -3   43.19    1.65
   6  -3   3   44.18    1.50
  -7   3  -3    2.55    0.52
   7  -3   3    2.20    0.46
  -8   3  -3    0.34    0.36
   8  -3   3    0.43    0.35
  -9   3  -3   14.20    1.12
   9  -3   3   13.90    1.03
 -10   3  -3    0.05    0.27
  10  -3   3    0.39    0.30
 -11   3  -3    2.22    0.63
  11  -3   3    3.42    0.70
  11   2  -3    1.82    0.50
 -11  -2   3    0.58    0.34
  10   2  -3    0.84    0.35
 -10  -2   3    1.38    0.46
   9   2  -3    7.19    0.71
  -9  -2   3    6.49    0.70
   8   2  -3    4.67    0.54
  -8  -2   3    4.85    0.78
   7   2  -3    0.57    0.18
   7   2  -3    0.53    0.19
  -7  -2   3    0.03    0.28
   6   2  -3   22.43    0.93
   6   2  -3   23.71    1.02
  -6  -2   3   24.87    1.21
   5   2  -3    0.16    0.18
   5   2  -3    0.46    0.13
  -5  -2   3    0.26    0.20
   4   2  -3    0.41    0.17
   4   2  -3   -0.04    0.08
  -4  -2   3    0.01    0.10
   3   2  -3    4.83    0.39
   3   2  -3    5.37    0.34
  -3  -2   3    4.44    0.41
   2   2  -3   10.52    0.39
   2   2  -3   10.76    0.56
  -2  -2   3   11.03    0.62
   1   2  -3   15.09    0.66
   1   2  -3   14.70    0.38
  -1  -2   3   14.51    0.69
  -1  -2   3   15.29    0.38
   0   2  -3   41.58    1.17
   0  -2   3   43.03    0.70
   0  -2   3   43.87    1.26
  -1   2  -3  113.97    2.24
   1  -2   3  107.27    1.76
   1  -2   3  109.21    2.32
  -2   2  -3  194.26    3.56
  -2   2  -3  189.97    3.37
   2  -2   3  193.29    3.11
  -3   2  -3   43.26    1.17
  -3   2  -3   43.35    1.33
   3  -2   3   43.63    1.12
  -4   2  -3   32.11    0.96
  -4   2  -3   30.91    1.17
   4  -2   3   30.82    1.02
  -5   2  -3    2.08    0.27
  -5   2  -3    2.62    0.45
   5  -2   3    2.17    0.36
  -6   2  -3    4.41    0.33
  -6   2  -3    4.84    0.50
   6  -2   3    4.55    0.49
  -7   2  -3   25.63    1.26
   7  -2   3   27.09    1.23
  -8   2  -3    1.25    0.35
   8  -2   3    0.82    0.32
  -9   2  -3    3.68    0.59
   9  -2   3    2.98    0.57
 -10   2  -3   13.25    1.03
  10  -2   3   12.78    1.03
 -11   2  -3    5.77    0.98
  11  -2   3    7.12    1.01
  11   1  -3    0.38    0.44
 -11  -1   3    0.56    0.31
  10   1  -3   -0.33    0.20
   9   1  -3   14.96    1.05
  -9  -1   3   14.77    1.06
   8   1  -3    0.28    0.19
  -8  -1   3    0.12    0.19
   7   1  -3    0.79    0.25
   7   1  -3    0.49    0.18
  -7  -1   3    0.46    0.21
   6   1  -3   10.21    0.58
   6   1  -3   10.23    0.70
  -6  -1   3   10.51    0.76
   5   1  -3   26.59    1.02
   5   1  -3   26.35    0.96
  -5  -1   3   26.88    1.12
   4   1  -3    2.28    0.27
   4   1  -3    2.28    0.26
  -4  -1   3    2.22    0.37
   3   1  -3    0.97    0.20
   3   1  -3    1.22    0.19
  -3  -1   3    1.06    0.26
   2   1  -3    3.10    0.23
   2   1  -3    2.92    0.27
  -2  -1   3    2.52    0.28
   1   1  -3   89.94    1.85
   1   1  -3   92.72    1.62
  -1  -1   3   91.03    1.90
   0   1  -3  160.34    2.82
   0   1  -3  159.65    2.50
   0  -1   3  160.50    2.86
  -1   1  -3    1.29    0.14
  -1   1  -3    1.16    0.20
   1  -1   3    1.08    0.21
  -2   1  -3   68.29    1.56
  -2   1  -3   64.03    1.41
   2  -1   3   67.68    1.34
  -3   1  -3    5.17    0.32
  -3   1  -3    5.81    0.42
   3  -1   3    5.22    0.34
  -4   1  -3    8.02    0.39
  -4   1  -3    8.68    0.56
   4  -1   3    8.09    0.47
  -5   1  -3   37.88    1.31
  -5   1  -3   35.95    0.89
   5  -1   3   36.16    1.21
  -6   1  -3   71.47    1.40
  -6   1  -3   74.02    2.08
   6  -1   3   72.42    2.00
  -7   1  -3   21.32    1.10
   7  -1   3   22.23    1.09
  -8   1  -3   24.69    1.26
   8  -1   3   23.11    1.20
  -9   1  -3   41.16    1.77
   9  -1   3   42.34    1.77
 -10   1  -3    2.93    0.64
  10  -1   3    3.18    0.62
 -11   1  -3    1.37    0.59
  11  -1   3    2.06    0.56
 -12   1  -3    3.82    0.77
  12  -1   3    4.04    0.77
  11   0  -3    5.91    0.91
  10   0  -3    9.02    0.91
 -10   0   3   10.48    0.91
   9   0  -3    4.59    0.75
  -9   0   3    4.47    0.69
   8   0  -3   13.00    0.93
  -8   0   3   12.80    0.92
   7   0  -3   12.24    0.83
  -7   0   3   11.46    0.80
  -7   0   3   11.27    0.66
   6   0  -3   34.66    1.34
  -6   0   3   35.89    1.14
  -6   0   3   35.33    1.35
   5   0  -3    0.30    0.11
   5   0  -3    0.06    0.12
  -5   0   3    0.30    0.14
   4   0  -3    3.48    0.33
   4   0  -3    3.15    0.29
  -4   0   3    2.64    0.37
   3   0  -3   35.34    1.05
   3   0  -3   35.88    1.05
  -3   0   3   35.29    1.08
   2   0  -3   28.63    0.83
   2   0  -3   27.54    0.85
  -2   0   3   27.59    0.86
   1   0  -3  139.38    2.37
   1   0  -3  135.68    2.46
  -1   0   3  135.42    2.40
   0   0  -3   54.93    1.13
   0   0  -3   56.68    1.25
   0   0   3   55.31    1.19
  -1   0  -3  175.19    2.85
  -1   0  -3  179.87    2.92
  -1   0  -3  173.91    2.91
  -2   0  -3   18.44    0.65
  -2   0  -3   19.16    0.61
  -2   0  -3   18.51    0.58
  -3   0  -3    3.23    0.22
  -3   0  -3    3.10    0.28
  -4   0  -3   18.03    0.77
  -4   0  -3   17.31    0.52
  -5   0  -3    7.32    0.30
  -5   0  -3    7.07    0.51
   5   0   3    7.17    0.50
  -6   0  -3    3.04    0.18
  -6   0  -3    3.14    0.46
   6   0   3    3.55    0.50
  -7   0  -3    6.54    0.62
   7   0   3    6.64    0.59
  -8   0  -3   45.87    1.72
   8   0   3   44.78    1.69
  -9   0  -3    3.12    0.58
   9   0   3    3.71    0.60
 -10   0  -3    0.67    0.25
  10   0   3    0.03    0.23
 -11   0  -3    0.62    0.28
  11   0   3    0.61    0.44
 -12   0  -3    7.43    0.85
  12   0   3    6.56    1.03
  11  -1  -3    0.49    0.43
 -11   1   3    1.33    0.46
  10  -1  -3    1.26    0.39
 -10   1   3    1.46    0.41
   9  -1  -3    1.05    0.43
  -9   1   3    1.87    0.41
   8  -1  -3    3.96    0.65
  -8   1   3    2.47    0.50
   7  -1  -3    0.51    0.26
  -7   1   3    0.37    0.32
   6  -1  -3   45.85    1.61
  -6   1   3   47.09    1.55
  -6   1   3   47.89    1.36
   5  -1  -3   16.09    0.84
  -5   1   3   16.50    0.79
  -5   1   3   16.05    0.73
   4  -1  -3    1.04    0.23
  -4   1   3    1.26    0.21
  -4   1   3    1.05    0.23
   3  -1  -3    0.05    0.07
  -3   1   3   -0.07    0.06
   2  -1  -3   34.95    1.01
   2  -1  -3   37.48    1.01
  -2   1   3   34.60    0.90
   1  -1  -3   16.68    0.60
   1  -1  -3   15.94    0.59
  -1   1   3   16.36    0.50
   0  -1  -3  149.97    2.61
   0  -1  -3  150.50    2.60
   0   1   3  155.87    2.39
  -1  -1  -3    3.65    0.25
  -1  -1  -3    3.51    0.25
  -1  -1  -3    3.86    0.21
  -2  -1  -3   20.81    0.62
  -2  -1  -3   20.99    0.60
  -2  -1  -3   21.01    0.67
  -3  -1  -3   68.35    1.54
  -3  -1  -3   69.16    1.49
  -3  -1  -3   70.27    1.31
  -4  -1  -3    9.80    0.35
  -4  -1  -3   10.47    0.53
   4   1   3   10.08    0.53
  -5  -1  -3   25.12    0.95
   5   1   3   25.06    0.96
   5   1   3   25.46    0.52
   5   1   3   25.30    0.54
  -6  -1  -3    8.04    0.58
   6   1   3    7.72    0.57
   7   1   3   27.21    1.18
  -8  -1  -3   67.47    2.12
   8   1   3   69.93    2.17
  -9  -1  -3    6.52    0.72
   9   1   3    6.92    0.68
 -10  -1  -3    0.16    0.19
  10   1   3    0.36    0.18
 -11  -1  -3    1.01    0.36
  11   1   3    0.75    0.42
 -12  -1  -3    0.25    0.23
  12   1   3    0.61    0.50
  10  -2  -3   29.92    1.70
 -10   2   3   28.99    1.52
   9  -2  -3    0.72    0.40
  -9   2   3    0.72    0.26
   8  -2  -3    1.36    0.47
  -8   2   3    1.75    0.44
   7  -2  -3   43.61    1.72
  -7   2   3   43.55    1.55
   6  -2  -3    0.50    0.27
  -6   2   3    0.87    0.19
  -6   2   3    0.01    0.15
   5  -2  -3   28.18    1.19
  -5   2   3   27.65    1.02
  -5   2   3   27.77    0.97
   4  -2  -3   48.33    1.49
  -4   2   3   47.05    1.30
  -4   2   3   47.68    1.31
   3  -2  -3   70.58    1.75
  -3   2   3   70.60    1.64
  -3   2   3   69.30    1.51
   2  -2  -3    0.25    0.11
  -2   2   3    0.63    0.14
  -2   2   3    0.54    0.11
   1  -2  -3    1.26    0.24
  -1   2   3    1.17    0.21
  -1   2   3    0.99    0.10
   0  -2  -3  193.22    3.29
   0   2   3  193.96    2.80
   0   2   3  191.81    2.75
   0   2   3  197.58    3.26
  -1  -2  -3   20.48    0.67
  -1  -2  -3   20.36    0.43
   1   2   3   19.75    0.42
   1   2   3   19.70    0.64
  -2  -2  -3    0.37    0.07
  -2  -2  -3    0.17    0.06
   2   2   3    0.18    0.08
  -3  -2  -3    3.96    0.27
  -3  -2  -3    3.09    0.28
   3   2   3    3.59    0.23
  -4  -2  -3   36.58    1.05
  -4  -2  -3   41.36    1.21
   4   2   3   37.59    0.82
  -5  -2  -3    0.55    0.18
   5   2   3    0.54    0.09
   5   2   3    0.42    0.06
   5   2   3    0.47    0.15
  -6  -2  -3    3.76    0.36
   6   2   3    3.71    0.41
  -7  -2  -3   57.96    1.78
   7   2   3   59.58    1.84
  -8  -2  -3   59.47    1.93
   8   2   3   57.70    1.92
  -9  -2  -3    5.64    0.64
   9   2   3    5.72    0.62
 -10  -2  -3   20.24    1.25
  10   2   3   21.41    1.29
 -11  -2  -3    0.39    0.27
  11   2   3    0.04    0.34
 -12  -2  -3    0.41    0.40
  12   2   3    1.13    0.38
  10  -3  -3    0.98    0.31
 -10   3   3    1.26    0.42
   9  -3  -3   12.64    1.06
  -9   3   3   13.08    0.93
   8  -3  -3    8.85    0.89
  -8   3   3    8.43    0.70
   7  -3  -3    0.17    0.22
  -7   3   3   -0.20    0.11
   6  -3  -3   16.59    1.00
  -6   3   3   17.13    0.80
  -6   3   3   16.81    0.85
   5  -3  -3   24.52    1.15
  -5   3   3   25.26    0.98
  -5   3   3   25.46    0.96
   4  -3  -3    5.00    0.49
  -4   3   3    5.39    0.39
  -4   3   3    4.90    0.39
   3  -3  -3    0.98    0.26
  -3   3   3    1.45    0.21
  -3   3   3    1.46    0.26
   2  -3  -3    0.88    0.22
  -2   3   3    1.08    0.16
  -2   3   3    1.03    0.24
   1  -3  -3   25.93    0.89
  -1   3   3   25.70    0.87
  -1   3   3   25.16    0.55
   0  -3  -3   -0.06    0.07
   0   3   3    0.18    0.13
  -1  -3  -3    2.45    0.11
  -1  -3  -3    1.80    0.27
   1   3   3    1.70    0.20
   1   3   3    1.97    0.10
  -2  -3  -3   18.03    0.50
  -2  -3  -3   19.17    0.69
   2   3   3   18.53    0.63
  -3  -3  -3    0.10    0.10
  -3  -3  -3    0.29    0.14
   3   3   3    0.33    0.09
  -4  -3  -3  264.28    4.64
  -4  -3  -3  275.38    4.46
   4   3   3  272.59    4.15
  -5  -3  -3   10.49    0.60
   5   3   3   10.55    0.61
   5   3   3   10.62    0.37
  -6  -3  -3    4.69    0.47
   6   3   3    3.80    0.40
   6   3   3    4.45    0.19
  -7  -3  -3   37.96    1.41
   7   3   3   38.44    1.43
  -8  -3  -3    5.66    0.57
   8   3   3    4.71    0.52
  -9  -3  -3   12.77    0.88
   9   3   3   14.28    0.94
 -10  -3  -3    4.69    0.53
  10   3   3    3.73    0.66
 -11  -3  -3   17.53    1.18
  11   3   3   14.25    1.14
 -12  -3  -3    0.84    0.47
  12   3   3    0.18    0.26
 -13  -3  -3   17.21    1.29
  13   3   3   14.18    1.29
  10  -4  -3    2.73    0.74
   9  -4  -3    2.13    0.62
  -9   4   3    1.07    0.48
   8  -4  -3    1.51    0.45
  -8   4   3    2.68    0.51
   7  -4  -3    0.86    0.33
  -7   4   3    1.01    0.30
   6  -4  -3    5.16    0.59
  -6   4   3    4.14    0.45
  -6   4   3    3.87    0.48
   5  -4  -3    1.99    0.44
  -5   4   3    2.07    0.36
  -5   4   3    1.64    0.31
   4  -4  -3   17.01    0.91
  -4   4   3   16.64    0.80
  -4   4   3   16.23    0.71
   3  -4  -3    9.44    0.63
  -3   4   3    9.69    0.48
  -3   4   3    9.88    0.59
   2  -4  -3   17.20    0.80
  -2   4   3   16.25    0.55
  -2   4   3   15.97    0.72
   1  -4  -3  198.84    3.65
  -1   4   3  201.84    3.06
  -1   4   3  197.51    3.57
   0  -4  -3   33.93    0.69
   0  -4  -3   33.28    1.04
   0   4   3   34.32    1.05
  -1  -4  -3    6.21    0.40
  -1  -4  -3    6.13    0.26
   1   4   3    6.36    0.41
  -2  -4  -3    6.34    0.31
  -2  -4  -3    6.59    0.41
   2   4   3    6.34    0.39
  -3  -4  -3  186.40    3.16
  -3  -4  -3  185.76    3.40
   3   4   3  186.75    3.20
  -4  -4  -3   30.59    1.05
  -4  -4  -3   30.99    0.98
   4   4   3   30.26    0.86
  -5  -4  -3    7.66    0.53
  -5  -4  -3    8.15    0.52
   5   4   3    7.86    0.38
  -6  -4  -3   63.06    1.76
   6   4   3   62.45    1.27
   6   4   3   62.38    1.77
  -7  -4  -3    2.03    0.37
   7   4   3    1.70    0.36
   7   4   3    1.75    0.14
  -8  -4  -3   10.95    0.79
   8   4   3   10.27    0.77
  -9  -4  -3   47.36    1.85
   9   4   3   45.71    1.78
 -10  -4  -3   21.83    1.31
  10   4   3   24.00    1.33
 -11  -4  -3    1.63    0.47
  11   4   3    1.46    0.53
 -12  -4  -3   15.55    1.20
  12   4   3   14.30    1.13
 -13  -4  -3    4.93    0.87
  13   4   3    5.48    0.97
   9  -5  -3    2.34    0.58
   8  -5  -3    2.38    0.53
  -8   5   3    2.44    0.47
   7  -5  -3    4.02    0.66
  -7   5   3    3.48    0.56
   6  -5  -3    2.94    0.53
  -6   5   3    2.94    0.44
  -6   5   3    3.17    0.37
   5  -5  -3    1.51    0.43
  -5   5   3    1.78    0.34
  -5   5   3    1.63    0.34
   4  -5  -3    4.77    0.52
  -4   5   3    5.01    0.41
  -4   5   3    4.58    0.44
   3  -5  -3   48.59    1.59
  -3   5   3   47.52    1.47
  -3   5   3   48.26    1.26
   2  -5  -3   12.91    0.72
  -2   5   3   12.54    0.70
  -2   5   3   12.24    0.51
   1  -5  -3    9.53    0.58
   1  -5  -3    9.78    0.42
  -1   5   3   10.12    0.61
   0  -5  -3    3.01    0.22
   0  -5  -3    2.45    0.30
   0   5   3    3.23    0.35
  -1  -5  -3    1.12    0.17
  -1  -5  -3    1.14    0.22
   1   5   3    1.65    0.27
  -2  -5  -3    0.13    0.08
  -2  -5  -3    0.45    0.14
   2   5   3    0.18    0.07
  -3  -5  -3   30.73    0.95
  -3  -5  -3   32.50    1.07
   3   5   3   32.04    1.01
  -4  -5  -3    1.12    0.27
  -4  -5  -3    0.98    0.24
   4   5   3    1.15    0.22
  -5  -5  -3   31.64    1.14
  -5  -5  -3   32.21    1.16
   5   5   3   31.56    0.96
  -6  -5  -3   60.37    1.78
   6   5   3   57.94    1.36
   6   5   3   55.87    1.68
  -7  -5  -3   18.13    0.99
   7   5   3   18.39    0.65
   7   5   3   17.54    0.92
  -8  -5  -3    5.83    0.59
   8   5   3    5.79    0.58
  -9  -5  -3    1.05    0.30
   9   5   3    0.67    0.26
 -10  -5  -3   18.61    1.19
  10   5   3   17.07    1.10
 -11  -5  -3   25.88    1.51
  11   5   3   24.56    1.46
 -12  -5  -3   -0.23    0.19
  12   5   3    0.43    0.41
   9  -6  -3    3.51    0.75
   8  -6  -3    0.39    0.25
   7  -6  -3    4.21    0.71
  -7   6   3    4.61    0.52
   6  -6  -3    0.37    0.22
  -6   6   3    1.11    0.29
  -6   6   3    0.30    0.27
   5  -6  -3   37.21    1.57
  -5   6   3   36.21    1.30
  -5   6   3   36.70    1.36
   4  -6  -3    8.64    0.73
  -4   6   3    9.89    0.67
  -4   6   3    8.79    0.57
   3  -6  -3   29.88    1.27
  -3   6   3   30.99    1.20
  -3   6   3   31.61    1.03
   2  -6  -3   49.40    1.61
  -2   6   3   52.68    1.60
   1  -6  -3    7.77    0.43
   1  -6  -3    8.30    0.58
  -1   6   3    8.75    0.60
   0  -6  -3    0.31    0.17
   0  -6  -3    0.32    0.14
   0   6   3    0.65    0.23
  -1  -6  -3    0.01    0.08
  -1  -6  -3    0.11    0.14
   1   6   3    0.03    0.12
  -2  -6  -3    0.64    0.17
  -2  -6  -3    0.66    0.16
   2   6   3    0.46    0.19
  -3  -6  -3    5.39    0.44
  -3  -6  -3    6.72    0.43
   3   6   3    6.43    0.49
  -4  -6  -3   21.09    0.88
  -4  -6  -3   21.84    0.91
   4   6   3   21.12    0.86
  -5  -6  -3   24.37    1.02
  -5  -6  -3   23.51    1.00
   5   6   3   24.28    0.91
  -6  -6  -3   25.85    1.15
   6   6   3   26.78    1.10
   6   6   3   25.39    0.91
  -7  -6  -3    0.70    0.22
   7   6   3    0.62    0.17
   7   6   3    0.08    0.14
   8   6   3    0.27    0.26
  -9  -6  -3   12.32    0.95
   9   6   3   14.63    0.94
 -10  -6  -3   15.07    1.09
  10   6   3   13.43    1.00
 -11  -6  -3    4.66    0.76
  11   6   3    4.40    0.75
 -12  -6  -3   -0.09    0.17
  12   6   3    0.64    0.32
   8  -7  -3    1.30    0.50
   7  -7  -3    8.14    0.86
   6  -7  -3   13.26    1.05
  -6   7   3   14.75    0.89
  -6   7   3   14.79    1.07
   5  -7  -3   -0.24    0.21
  -5   7   3    0.03    0.10
  -5   7   3   -0.14    0.23
   4  -7  -3   13.49    0.93
  -4   7   3   14.57    0.77
  -4   7   3   14.93    0.88
   3  -7  -3    8.27    0.70
  -3   7   3    8.00    0.62
   2  -7  -3    4.55    0.47
   2  -7  -3    3.89    0.37
  -2   7   3    5.13    0.47
   1  -7  -3   35.21    1.30
   1  -7  -3   35.23    1.10
  -1   7   3   35.92    1.34
   0  -7  -3   18.45    0.87
   0  -7  -3   17.29    0.72
   0   7   3   18.96    0.92
  -1  -7  -3    2.39    0.28
  -1  -7  -3    2.59    0.31
   1   7   3    2.17    0.39
  -2  -7  -3    2.29    0.34
  -2  -7  -3    3.04    0.32
   2   7   3    2.73    0.42
  -3  -7  -3   51.29    1.50
  -3  -7  -3   48.33    1.44
   3   7   3   50.49    1.54
  -4  -7  -3    5.01    0.46
  -4  -7  -3    4.51    0.43
   4   7   3    4.70    0.46
  -5  -7  -3   33.49    1.30
  -5  -7  -3   32.98    1.23
   5   7   3   32.70    1.19
  -6  -7  -3    0.12    0.21
   6   7   3    0.43    0.18
   6   7   3    0.73    0.21
  -7  -7  -3    4.18    0.64
   7   7   3    4.22    0.38
   7   7   3    4.05    0.46
  -8  -7  -3    1.89    0.43
   8   7   3    1.71    0.38
   8   7   3    2.25    0.41
  -9  -7  -3    2.04    0.42
   9   7   3    2.10    0.46
 -10  -7  -3    4.26    0.77
  10   7   3    3.08    0.58
 -11  -7  -3    0.03    0.31
  11   7   3    0.26    0.34
 -12  -7  -3    0.24    0.33
  12   7   3    0.49    0.44
   7  -8  -3    1.44    0.41
   6  -8  -3    9.22    0.85
   5  -8  -3    6.22    0.88
  -5   8   3    5.40    0.61
   4  -8  -3    0.54    0.16
  -4   8   3   -0.21    0.16
   3  -8  -3    3.60    0.57
   3  -8  -3    3.49    0.41
  -3   8   3    3.35    0.53
   2  -8  -3    7.37    0.54
   2  -8  -3    7.47    0.64
  -2   8   3    7.12    0.65
   1  -8  -3   40.97    1.33
   1  -8  -3   44.54    1.55
  -1   8   3   44.54    1.63
   0  -8  -3    1.47    0.33
   0  -8  -3    1.50    0.32
   0   8   3    1.51    0.40
  -1  -8  -3    0.24    0.15
  -1  -8  -3    0.45    0.19
   1   8   3    0.02    0.16
  -2  -8  -3   20.79    0.94
  -2  -8  -3   21.03    0.93
   2   8   3   19.70    1.02
  -3  -8  -3   79.54    2.04
  -3  -8  -3   79.84    2.07
   3   8   3   82.72    2.26
  -4  -8  -3    4.42    0.44
  -4  -8  -3    4.57    0.45
   4   8   3    4.25    0.49
  -5  -8  -3    1.40    0.34
  -5  -8  -3    1.13    0.32
   5   8   3    1.61    0.34
  -6  -8  -3    0.43    0.26
   6   8   3    0.19    0.18
   6   8   3    0.12    0.19
  -7  -8  -3    2.04    0.49
   7   8   3    3.08    0.36
   7   8   3    2.16    0.40
  -8  -8  -3    8.29    0.83
   8   8   3    8.79    0.72
   8   8   3    8.53    0.62
  -9  -8  -3    1.36    0.49
   9   8   3    1.41    0.38
 -10  -8  -3    2.67    0.56
  10   8   3    3.82    0.67
 -11  -8  -3   11.65    1.06
  11   8   3   10.00    0.95
   6  -9  -3   13.28    1.06
   5  -9  -3    0.37    0.23
  -5   9   3   -0.33    0.32
   4  -9  -3    5.80    0.60
  -4   9   3    4.80    0.71
   3  -9  -3    4.44    0.65
  -3   9   3    4.81    0.74
   2  -9  -3    2.41    0.48
   2  -9  -3    3.10    0.51
  -2   9   3    1.94    0.50
   1  -9  -3   12.52    0.76
   1  -9  -3   12.90    0.81
  -1   9   3   13.09    0.93
   0  -9  -3   17.98    0.89
   0  -9  -3   18.04    0.95
   0   9   3   16.55    1.03
  -1  -9  -3    7.43    0.58
  -1  -9  -3    7.68    0.60
   1   9   3    8.16    0.71
  -2  -9  -3   45.94    1.50
  -2  -9  -3   43.72    1.51
   2   9   3   48.05    1.75
  -3  -9  -3    0.34    0.17
  -3  -9  -3   -0.07    0.11
   3   9   3    0.03    0.20
  -4  -9  -3    2.39    0.41
  -4  -9  -3    3.18    0.36
   4   9   3    2.80    0.49
  -5  -9  -3    5.82    0.60
  -5  -9  -3    5.64    0.52
   5   9   3    5.63    0.59
  -6  -9  -3   10.31    0.82
   6   9   3    9.79    0.73
   6   9   3   10.49    0.71
  -7  -9  -3   28.14    1.42
   7   9   3   26.59    1.22
   7   9   3   27.51    1.20
  -8  -9  -3   -0.14    0.33
   8   9   3    0.20    0.21
   8   9   3   -0.01    0.19
  -9  -9  -3    2.10    0.58
   9   9   3    3.09    0.58
 -10  -9  -3   13.41    1.14
 -11  -9  -3    0.51    0.43
   5 -10  -3    3.33    0.65
  -5  10   3    2.98    0.62
   4 -10  -3    3.07    0.61
  -4  10   3    2.49    0.59
   3 -10  -3    1.23    0.45
  -3  10   3    1.31    0.52
   2 -10  -3   17.86    1.04
  -2  10   3   15.95    1.10
   1 -10  -3    2.38    0.46
  -1  10   3    1.28    0.48
   0 -10  -3    3.87    0.46
   0 -10  -3    4.40    0.49
   0  10   3    3.73    0.69
  -1 -10  -3   13.89    0.87
  -1 -10  -3   14.50    0.85
   1  10   3   12.15    0.96
  -2 -10  -3    3.41    0.57
   2  10   3    3.38    0.55
  -3 -10  -3    2.10    0.44
   3  10   3    1.42    0.38
  -4 -10  -3    3.85    0.64
   4  10   3    3.96    0.62
  -5 -10  -3   10.94    0.84
   5  10   3   10.70    0.84
  -6 -10  -3    0.67    0.28
   6  10   3    1.08    0.32
  -7 -10  -3    2.52    0.60
   7  10   3    3.26    0.57
  -8 -10  -3    6.93    1.00
   8  10   3    5.63    0.60
  -9 -10  -3    1.55    0.60
 -10 -10  -3    3.38    0.76
  -4  11   3   -0.72    0.31
  -3  11   3   -0.21    0.30
  -2  11   3    6.31    0.92
  -1  11   3   13.68    1.08
   0  11   3    2.21    0.52
   1  11   3    1.70    0.42
  -2 -11  -3    1.53    0.39
   2  11   3    1.33    0.51
  -3 -11  -3    4.64    0.66
   3  11   3    4.61    0.74
  -4 -11  -3    0.72    0.38
   4  11   3    0.24    0.20
  -5 -11  -3    1.01    0.38
   5  11   3    1.59    0.43
  -6 -11  -3   14.41    1.06
   6  11   3   14.21    1.03
  -7 -11  -3    0.11    0.33
   7  11   3    0.52    0.28
  -8 -11  -3    3.43    0.74
   8  11   3    5.65    0.58
  -9 -11  -3    4.87    0.90
  -2  12   3    1.19    0.48
  -1  12   3    0.25    0.22
   0  12   3    3.31    0.76
   1  12   3    5.18    0.88
   2  12   3   -0.42    0.24
   3  12   3    2.28    0.63
  -4 -12  -3    3.40    0.70
   4  12   3    3.09    0.66
   5  12   3    1.81    0.46
  -6 -12  -3    1.25    0.42
   6  12   3    1.42    0.41
  -7 -12  -3    4.75    0.91
   7  12   3    3.87    0.68
   2  13   3    3.54    0.70
   3  13   3    2.46    0.60
   4  13   3    0.95    0.51
   4   9  -4    7.19    0.77
  -4  -9   4    5.63    0.96
   3   9  -4    1.66    0.49
  -3  -9   4    2.30    0.64
   2   9  -4   10.96    0.97
  -2  -9   4    8.55    1.02
   1   9  -4    7.69    0.84
  -1  -9   4    8.55    0.93
   0   9  -4    0.22    0.22
  -1   9  -4    1.17    0.52
   1  -9   4    2.36    0.57
  -2   9  -4    8.99    0.84
   2  -9   4    7.59    0.91
  -3   9  -4    0.47    0.35
   3  -9   4    0.77    0.32
   6   8  -4    4.87    0.79
  -6  -8   4    6.08    0.96
   5   8  -4    1.02    0.40
  -5  -8   4    0.55    0.46
   4   8  -4    0.62    0.23
  -4  -8   4    0.09    0.43
   3   8  -4    4.32    0.76
  -3  -8   4    4.41    0.87
   2   8  -4    1.24    0.43
  -2  -8   4    1.23    0.44
   1   8  -4    0.26    0.34
  -1  -8   4    0.45    0.31
   0   8  -4    4.41    0.74
   0  -8   4    6.24    0.92
  -1   8  -4    0.13    0.28
   1  -8   4   -0.16    0.14
  -2   8  -4    7.46    0.73
   2  -8   4    7.37    0.80
  -3   8  -4    9.08    0.86
   3  -8   4    8.52    1.13
  -4   8  -4   10.16    0.90
   4  -8   4    9.66    1.01
  -5   8  -4    0.31    0.28
   5  -8   4    0.42    0.42
  -8  -7   4    0.31    0.52
   7   7  -4    0.32    0.33
  -7  -7   4   -0.05    0.28
   6   7  -4    2.26    0.53
  -6  -7   4    3.29    0.75
   5   7  -4    0.49    0.25
  -5  -7   4    0.36    0.35
   4   7  -4    1.82    0.39
  -4  -7   4    0.52    0.40
   3   7  -4    0.72    0.35
  -3  -7   4    1.71    0.42
   2   7  -4   18.66    1.17
  -2  -7   4   17.60    1.20
   1   7  -4   12.18    0.91
  -1  -7   4   13.86    1.07
   0   7  -4    1.12    0.30
   0  -7   4    0.45    0.39
  -1   7  -4   26.38    1.34
   1  -7   4   25.25    1.47
  -2   7  -4    1.88    0.44
   2  -7   4    2.51    0.61
  -3   7  -4    0.45    0.28
   3  -7   4    0.11    0.25
  -4   7  -4   14.49    1.00
   4  -7   4   15.51    1.17
  -5   7  -4    8.87    0.76
   5  -7   4    7.60    0.89
   6  -7   4    0.46    0.43
   7  -7   4    5.68    0.93
  -8  -6   4    4.73    0.89
   7   6  -4    1.21    0.43
  -7  -6   4    1.74    0.50
   6   6  -4    0.21    0.24
  -6  -6   4    0.98    0.38
   5   6  -4    0.27    0.24
  -5  -6   4   -0.29    0.15
   4   6  -4   -0.06    0.14
  -4  -6   4   -0.17    0.15
   3   6  -4   23.08    1.20
  -3  -6   4   23.01    1.33
   2   6  -4    1.88    0.42
  -2  -6   4    0.74    0.34
   1   6  -4   10.91    0.84
  -1  -6   4   10.89    0.87
   0   6  -4    2.75    0.53
   0  -6   4    3.64    0.62
  -1   6  -4    4.90    0.57
   1  -6   4    6.38    0.68
  -2   6  -4    2.82    0.57
   2  -6   4    2.32    0.51
  -3   6  -4   28.99    1.33
   3  -6   4   27.22    1.45
  -4   6  -4    5.07    0.60
   4  -6   4    4.95    0.82
  -5   6  -4    2.53    0.52
   5  -6   4    1.93    0.58
   6  -6   4    5.05    0.88
  -7   6  -4   -0.36    0.16
  -8   6  -4    0.68    0.29
  -9  -5   4    0.89    0.60
  -8  -5   4    0.80    0.40
   7   5  -4    4.97    0.60
  -7  -5   4    5.44    0.89
   6   5  -4    0.12    0.24
  -6  -5   4    0.27    0.23
   5   5  -4    0.04    0.23
   4   5  -4    3.37    0.54
  -4  -5   4    2.97    0.58
   3   5  -4   27.06    1.22
  -3  -5   4   26.78    1.37
   2   5  -4   10.66    0.76
  -2  -5   4   10.28    0.81
   1   5  -4    0.11    0.19
  -1  -5   4    0.25    0.17
   0   5  -4    3.75    0.44
   0  -5   4    3.27    0.59
  -1   5  -4    2.82    0.47
   1  -5   4    1.15    0.38
  -2   5  -4    1.39    0.30
   2  -5   4    1.32    0.33
  -3   5  -4   10.20    0.72
   3  -5   4   10.63    0.83
  -4   5  -4   27.17    1.21
   4  -5   4   27.02    1.39
  -5   5  -4   31.48    1.29
  -5   5  -4   32.34    1.52
  -6   5  -4    3.35    0.49
  -6   5  -4    3.79    0.62
  -7   5  -4   22.51    1.33
  -8   5  -4    1.13    0.34
  -9   5  -4   -0.28    0.37
 -10  -4   4    0.05    0.48
  -9  -4   4   12.55    1.16
  -8  -4   4    3.65    0.73
   7   4  -4   12.47    0.82
  -7  -4   4   11.71    0.99
   6   4  -4    1.09    0.28
  -6  -4   4    0.93    0.38
   5   4  -4    6.12    0.56
  -5  -4   4    5.23    0.62
   4   4  -4    6.10    0.57
  -4  -4   4    6.20    0.61
   3   4  -4   14.69    0.86
  -3  -4   4   15.51    0.96
   2   4  -4   46.86    1.57
  -2  -4   4   48.18    1.70
   1   4  -4   27.72    1.17
  -1  -4   4   27.09    1.23
   0   4  -4   62.04    1.85
   0  -4   4   61.98    1.96
  -1   4  -4   -0.04    0.15
   1  -4   4    0.07    0.18
  -2   4  -4    4.24    0.46
   2  -4   4    4.13    0.60
  -3   4  -4   33.37    1.26
   3  -4   4   35.64    1.47
   3  -4   4   34.63    0.94
  -4   4  -4    0.01    0.18
  -4   4  -4    0.08    0.09
   4  -4   4    0.20    0.13
  -5   4  -4    1.77    0.32
  -5   4  -4    1.50    0.43
   5  -4   4    1.45    0.32
  -6   4  -4   12.95    0.74
  -6   4  -4   12.12    0.93
   6  -4   4   13.65    0.78
  -7   4  -4    2.05    0.51
   7  -4   4    1.62    0.38
  -8   4  -4    0.49    0.32
   8  -4   4    0.28    0.23
  -9   4  -4    1.59    0.59
   9  -4   4    2.16    0.52
 -10   4  -4    0.29    0.35
  10  -4   4   -0.17    0.25
 -10  -3   4    3.02    0.73
  -9  -3   4    0.93    0.49
   8   3  -4    0.22    0.28
  -8  -3   4    0.18    0.32
   7   3  -4   17.27    0.94
   7   3  -4   17.03    0.94
  -7  -3   4   18.89    1.18
   6   3  -4   43.80    1.41
   6   3  -4   44.70    1.54
  -6  -3   4   42.14    1.75
   5   3  -4    5.42    0.44
   5   3  -4    5.47    0.51
  -5  -3   4    4.72    0.53
   4   3  -4   18.72    0.72
   4   3  -4   18.52    0.91
  -4  -3   4   19.47    1.05
   3   3  -4   15.77    0.57
   3   3  -4   14.74    0.79
  -3  -3   4   15.48    0.91
   2   3  -4    2.68    0.40
   2   3  -4    2.39    0.16
  -2  -3   4    2.45    0.42
   1   3  -4    0.24    0.08
  -1  -3   4    0.24    0.16
   0   3  -4   11.35    0.67
   0  -3   4   10.25    0.68
  -1   3  -4    4.26    0.41
   1  -3   4    4.47    0.15
   1  -3   4    4.23    0.15
   1  -3   4    4.11    0.43
  -2   3  -4   59.32    1.66
   2  -3   4   58.00    1.18
   2  -3   4   58.33    1.78
  -3   3  -4   47.61    1.59
  -3   3  -4   47.17    1.44
   3  -3   4   47.91    1.18
  -4   3  -4   13.60    0.73
  -4   3  -4   13.76    0.86
   4  -3   4   13.15    0.63
  -5   3  -4    0.28    0.19
  -5   3  -4    0.38    0.15
   5  -3   4    0.17    0.15
  -6   3  -4   49.58    1.82
  -6   3  -4   47.98    1.40
   6  -3   4   46.57    1.56
  -7   3  -4    0.16    0.23
   7  -3   4   -0.13    0.15
  -8   3  -4    2.10    0.55
   8  -3   4    2.00    0.51
  -9   3  -4    1.45    0.53
   9  -3   4    2.25    0.53
 -10   3  -4    3.91    0.72
  10  -3   4    4.49    0.71
  10   2  -4    0.82    0.36
 -10  -2   4    1.38    0.38
   9   2  -4    1.60    0.44
  -9  -2   4    2.24    0.57
   8   2  -4   38.18    1.57
  -8  -2   4   37.84    1.73
   7   2  -4    0.71    0.19
   7   2  -4    0.27    0.24
  -7  -2   4    0.18    0.24
   6   2  -4    2.73    0.43
   6   2  -4    2.15    0.37
  -6  -2   4    2.88    0.56
   5   2  -4    5.52    0.47
   5   2  -4    6.46    0.51
  -5  -2   4    6.65    0.61
   4   2  -4    6.98    0.54
   4   2  -4    8.16    0.50
  -4  -2   4    7.96    0.63
   3   2  -4    9.15    0.46
   3   2  -4    8.05    0.56
  -3  -2   4    7.41    0.59
   2   2  -4   14.54    0.73
   2   2  -4   15.06    0.53
  -2  -2   4   14.59    0.78
   1   2  -4   49.65    0.99
   1   2  -4   51.24    1.45
  -1  -2   4   51.25    1.51
   0   2  -4    0.51    0.20
   0   2  -4    0.98    0.10
   0  -2   4    1.03    0.15
   0  -2   4    0.79    0.21
  -1   2  -4    7.62    0.50
   1  -2   4    8.34    0.55
   1  -2   4    8.46    0.31
  -2   2  -4  169.56    3.22
   2  -2   4  170.76    2.83
   2  -2   4  174.10    3.45
  -3   2  -4   18.52    0.77
  -3   2  -4   19.09    0.90
   3  -2   4   18.87    0.68
  -4   2  -4    1.52    0.33
  -4   2  -4    1.93    0.30
   4  -2   4    1.69    0.28
  -5   2  -4   59.38    1.48
  -5   2  -4   59.05    1.84
   5  -2   4   59.59    1.65
  -6   2  -4   22.02    0.82
  -6   2  -4   23.04    1.17
   6  -2   4   22.87    1.04
  -7   2  -4    2.20    0.48
   7  -2   4    2.23    0.43
  -8   2  -4   15.02    1.03
   8  -2   4   14.98    0.96
  -9   2  -4    9.83    0.89
   9  -2   4   10.54    0.88
 -10   2  -4    1.30    0.38
  10  -2   4    1.73    0.46
 -11   2  -4    6.31    1.01
  11  -2   4    5.66    0.97
  10   1  -4    3.49    0.64
 -10  -1   4    4.17    0.80
   9   1  -4    8.28    0.80
  -9  -1   4    7.63    0.77
   8   1  -4    1.01    0.36
  -8  -1   4    0.44    0.34
   7   1  -4   21.87    1.00
   7   1  -4   21.90    1.12
  -7  -1   4   21.63    1.19
   6   1  -4   20.54    0.93
   6   1  -4   20.95    1.02
  -6  -1   4   20.04    1.09
   5   1  -4    1.97    0.33
   5   1  -4    1.82    0.36
  -5  -1   4    2.41    0.44
   4   1  -4    0.77    0.19
   4   1  -4    1.08    0.23
  -4  -1   4    0.62    0.24
   3   1  -4   17.90    0.70
   3   1  -4   17.17    0.79
  -3  -1   4   18.09    0.85
   2   1  -4    0.70    0.18
   2   1  -4    0.56    0.15
  -2  -1   4    0.69    0.20
   1   1  -4    0.33    0.09
   1   1  -4    0.45    0.15
   0   1  -4   69.99    1.36
   0   1  -4   70.49    1.67
   0  -1   4   71.32    1.70
  -1   1  -4  171.38    3.07
  -1   1  -4  163.54    2.72
   1  -1   4  165.64    3.12
  -2   1  -4   64.67    1.54
  -2   1  -4   66.86    1.64
   2  -1   4   66.48    1.37
  -3   1  -4    3.10    0.30
  -3   1  -4    2.90    0.32
   3  -1   4    3.23    0.27
  -4   1  -4    8.58    0.57
  -4   1  -4    8.83    0.46
   4  -1   4    8.26    0.49
  -5   1  -4    0.02    0.13
  -5   1  -4    0.19    0.14
   5  -1   4   -0.02    0.11
  -6   1  -4    1.37    0.38
  -6   1  -4    0.76    0.18
   6  -1   4    1.26    0.27
  -7   1  -4   36.99    1.52
   7  -1   4   35.81    1.43
  -8   1  -4    4.90    0.72
   8  -1   4    5.12    0.59
  -9   1  -4    2.09    0.53
   9  -1   4    2.24    0.56
 -10   1  -4   17.46    1.22
  10  -1   4   17.08    1.20
 -11   1  -4    3.91    0.79
  11  -1   4    3.17    0.70
 -12   1  -4   10.25    1.01
  12  -1   4   10.73    1.04
  10   0  -4    1.40    0.48
 -10   0   4    1.15    0.43
   9   0  -4    0.94    0.45
  -9   0   4    0.54    0.35
   8   0  -4    6.72    0.69
  -8   0   4    6.90    0.67
   7   0  -4    0.21    0.29
  -7   0   4    0.39    0.15
  -7   0   4    0.21    0.18
   6   0  -4   18.29    0.98
  -6   0   4   18.77    1.01
   5   0  -4   16.00    0.77
   5   0  -4   15.90    0.84
  -5   0   4   16.00    0.87
   4   0  -4    9.02    0.57
   4   0  -4    8.60    0.57
  -4   0   4    9.24    0.60
   3   0  -4    3.93    0.37
   3   0  -4    3.48    0.35
  -3   0   4    3.57    0.34
   2   0  -4   37.23    1.06
   2   0  -4   35.94    1.12
  -2   0   4   37.48    1.10
   1   0  -4   58.49    1.46
   1   0  -4   59.90    1.34
  -1   0   4   58.51    1.39
   0   0  -4    6.86    0.35
   0   0  -4    7.49    0.44
   0   0   4    6.88    0.40
  -1   0  -4   43.21    1.16
  -1   0  -4   45.13    1.06
   1   0   4   45.67    1.15
  -2   0  -4    4.26    0.30
  -2   0  -4    4.06    0.30
  -2   0  -4    4.12    0.33
  -3   0  -4   60.20    1.36
  -3   0  -4   60.36    1.51
   3   0   4   58.32    1.39
  -4   0  -4    0.35    0.13
  -4   0  -4    0.58    0.22
   4   0   4    0.31    0.14
  -5   0  -4    9.81    0.63
  -5   0  -4    9.33    0.43
   5   0   4    9.80    0.60
  -6   0  -4    1.11    0.17
  -6   0  -4    0.74    0.26
   6   0   4    1.84    0.31
  -7   0  -4   30.27    1.30
   7   0   4   29.85    1.26
  -8   0  -4   74.81    2.35
   8   0   4   77.05    2.33
  -9   0  -4   24.38    1.36
   9   0   4   24.71    1.33
 -10   0  -4    5.10    0.78
  10   0   4    5.77    0.87
 -11   0  -4    6.42    0.72
  11   0   4    3.86    0.80
 -12   0  -4    4.56    0.83
  12   0   4    4.56    0.88
  10  -1  -4    2.28    0.51
   9  -1  -4    0.07    0.29
  -9   1   4    0.60    0.29
   8  -1  -4   26.20    1.39
  -8   1   4   26.61    1.31
   7  -1  -4   21.78    1.21
  -7   1   4   18.90    1.11
  -7   1   4   21.83    1.12
   6  -1  -4    2.25    0.43
  -6   1   4    1.63    0.35
  -6   1   4    0.74    0.27
   5  -1  -4   13.31    0.79
  -5   1   4   12.39    0.72
  -5   1   4   12.79    0.71
   4  -1  -4   14.00    0.76
  -4   1   4   14.28    0.72
  -4   1   4   14.13    0.71
   3  -1  -4   24.52    0.94
   3  -1  -4   24.41    0.92
  -3   1   4   24.60    0.86
   2  -1  -4   21.07    0.82
   2  -1  -4   21.38    0.82
  -2   1   4   20.74    0.71
   1  -1  -4   36.36    1.08
   1  -1  -4   35.95    1.02
  -1   1   4   36.05    0.92
   0  -1  -4   26.12    0.86
   0  -1  -4   25.53    0.79
   0   1   4   25.02    0.69
  -1  -1  -4   37.51    1.04
  -1  -1  -4   35.97    0.99
   1   1   4   36.35    0.90
  -2  -1  -4   36.62    1.02
  -2  -1  -4   36.20    0.94
  -2  -1  -4   37.39    1.00
  -3  -1  -4   12.32    0.57
  -3  -1  -4   12.44    0.51
  -3  -1  -4   12.42    0.56
  -4  -1  -4   66.48    1.63
  -4  -1  -4   66.38    1.39
   4   1   4   68.08    1.65
  -5  -1  -4   33.30    0.83
  -5  -1  -4   32.58    1.14
   5   1   4   32.76    1.13
  -6  -1  -4   69.62    1.91
   6   1   4   66.35    1.24
   6   1   4   65.98    1.86
  -7  -1  -4   17.25    0.94
   7   1   4   19.19    0.97
  -8  -1  -4    3.32    0.55
   8   1   4    2.99    0.54
  -9  -1  -4   18.90    1.12
   9   1   4   17.23    1.11
 -10  -1  -4   -0.21    0.18
  10   1   4    0.03    0.28
 -11  -1  -4    3.53    0.71
  11   1   4    4.79    0.86
 -12  -1  -4    0.74    0.39
  12   1   4    0.36    0.33
  10  -2  -4    0.90    0.35
 -10   2   4    0.48    0.35
   9  -2  -4   11.71    1.06
  -9   2   4   10.30    0.85
   8  -2  -4   13.16    1.00
  -8   2   4   12.77    0.85
   7  -2  -4   20.82    1.21
  -7   2   4   21.41    1.05
   6  -2  -4   30.54    1.36
  -6   2   4   28.28    1.11
  -6   2   4   28.40    1.17
   5  -2  -4    0.92    0.28
  -5   2   4    0.48    0.21
  -5   2   4    0.65    0.22
   4  -2  -4   15.28    0.82
  -4   2   4   14.67    0.67
  -4   2   4   14.52    0.73
   3  -2  -4   34.40    1.19
  -3   2   4   34.05    0.99
  -3   2   4   34.99    1.15
   2  -2  -4    8.46    0.53
  -2   2   4    9.03    0.41
  -2   2   4    9.20    0.52
   1  -2  -4    1.35    0.24
  -1   2   4    1.79    0.28
  -1   2   4    1.63    0.15
   0  -2  -4   32.06    0.98
   0   2   4   32.79    1.00
   0   2   4   31.94    0.67
  -1  -2  -4  123.29    2.36
   1   2   4  121.17    2.33
  -2  -2  -4    4.33    0.35
  -2  -2  -4    4.64    0.26
   2   2   4    4.42    0.31
  -3  -2  -4    0.79    0.18
  -3  -2  -4    0.71    0.18
   3   2   4    0.56    0.15
  -4  -2  -4    2.39    0.25
  -4  -2  -4    2.41    0.35
   4   2   4    2.07    0.20
  -5  -2  -4   15.78    0.73
   5   2   4   14.78    0.50
   5   2   4   15.74    0.76
  -6  -2  -4   15.04    0.77
   6   2   4   14.32    0.40
   6   2   4   13.06    0.76
  -7  -2  -4   13.68    0.80
   7   2   4   14.28    0.84
  -8  -2  -4    3.32    0.50
   8   2   4    4.78    0.50
  -9  -2  -4   -0.32    0.14
   9   2   4    0.08    0.18
 -10  -2  -4    0.69    0.34
  10   2   4    0.15    0.31
 -11  -2  -4    2.36    0.57
  11   2   4    3.45    0.70
 -12  -2  -4    0.06    0.17
  12   2   4    0.55    0.30
  10  -3  -4    7.72    0.92
   9  -3  -4    5.62    0.96
  -9   3   4    6.94    0.70
   8  -3  -4    7.29    0.74
  -8   3   4    7.62    0.66
   7  -3  -4    4.69    0.73
  -7   3   4    4.05    0.58
   6  -3  -4    2.59    0.55
  -6   3   4    3.14    0.47
  -6   3   4    2.56    0.42
   5  -3  -4   60.00    1.93
  -5   3   4   58.20    1.60
  -5   3   4   61.89    1.74
   4  -3  -4   42.75    1.52
  -4   3   4   42.34    1.35
  -4   3   4   42.68    1.19
   3  -3  -4    7.88    0.57
  -3   3   4    8.01    0.41
  -3   3   4    8.33    0.55
   2  -3  -4  120.38    2.62
  -2   3   4  122.29    2.54
  -2   3   4  122.28    2.07
   1  -3  -4   22.50    0.87
   1  -3  -4   21.00    0.56
  -1   3   4   23.24    0.88
  -1   3   4   23.40    0.50
   0  -3  -4   54.58    1.44
   0   3   4   56.87    1.44
  -1  -3  -4  223.36    3.18
  -1  -3  -4  218.67    3.88
   1   3   4  220.00    3.16
   1   3   4  231.67    3.88
  -2  -3  -4   25.97    0.90
  -2  -3  -4   25.94    0.62
   2   3   4   25.88    0.84
  -3  -3  -4   94.76    2.08
  -3  -3  -4   93.83    1.76
   3   3   4   90.65    1.85
  -4  -3  -4   68.85    1.56
  -4  -3  -4   71.26    1.79
   4   3   4   70.46    1.48
  -5  -3  -4   34.08    1.09
  -5  -3  -4   32.50    1.17
   5   3   4   33.39    0.84
  -6  -3  -4    9.51    0.60
   6   3   4    9.57    0.65
   6   3   4   10.30    0.36
  -7  -3  -4    0.40    0.21
   7   3   4    0.53    0.19
  -8  -3  -4   20.35    1.07
   8   3   4   22.42    1.14
  -9  -3  -4   19.65    1.12
   9   3   4   18.32    1.10
 -10  -3  -4   12.58    0.95
  10   3   4   12.55    0.98
 -11  -3  -4    1.01    0.38
  11   3   4    0.34    0.28
 -12  -3  -4    2.73    0.68
  12   3   4    3.15    0.73
 -13  -3  -4    1.10    0.48
  13   3   4    0.65    0.53
  10  -4  -4    9.38    1.11
   9  -4  -4   15.19    1.25
   8  -4  -4    0.85    0.27
  -8   4   4    0.17    0.28
   7  -4  -4    4.22    0.69
  -7   4   4    3.30    0.48
   6  -4  -4   13.87    0.99
  -6   4   4   13.99    0.80
  -6   4   4   14.30    0.78
   5  -4  -4    5.30    0.60
  -5   4   4    5.34    0.48
  -5   4   4    5.51    0.44
   4  -4  -4    3.50    0.55
  -4   4   4    3.89    0.40
  -4   4   4    3.39    0.31
   3  -4  -4  125.42    2.90
  -3   4   4  125.04    2.31
  -3   4   4  123.50    2.69
   2  -4  -4   72.36    1.94
  -2   4   4   75.07    1.42
  -2   4   4   75.16    1.88
   1  -4  -4    9.81    0.59
  -1   4   4    9.34    0.58
  -1   4   4    9.71    0.28
   0  -4  -4    2.84    0.32
   0   4   4    3.43    0.34
  -1  -4  -4   53.94    1.44
   1   4   4   51.50    1.40
  -2  -4  -4   27.15    0.63
  -2  -4  -4   25.54    0.94
   2   4   4   27.21    0.91
  -3  -4  -4   15.61    0.74
  -3  -4  -4   15.75    0.54
   3   4   4   14.99    0.63
  -4  -4  -4   30.97    1.12
  -4  -4  -4   28.83    0.90
   4   4   4   28.54    0.88
  -5  -4  -4   -0.02    0.10
  -5  -4  -4   -0.17    0.11
   5   4   4   -0.04    0.09
  -6  -4  -4    1.32    0.31
   6   4   4    1.56    0.18
   6   4   4    2.22    0.40
  -7  -4  -4    4.55    0.45
   7   4   4    4.19    0.46
   7   4   4    4.28    0.24
  -8  -4  -4   13.60    0.86
   8   4   4   14.52    0.90
  -9  -4  -4    1.20    0.33
   9   4   4    0.65    0.29
 -10  -4  -4   14.52    1.02
  10   4   4   15.46    1.09
 -11  -4  -4   10.24    0.90
  11   4   4    8.36    0.85
 -12  -4  -4    3.83    0.73
  12   4   4    3.15    0.73
 -13  -4  -4    7.97    0.88
  13   4   4    6.76    1.06
   9  -5  -4    0.61    0.33
   8  -5  -4    5.05    0.86
   7  -5  -4   11.19    1.00
  -7   5   4   10.89    0.78
   6  -5  -4    1.29    0.43
  -6   5   4    1.06    0.35
  -6   5   4    1.05    0.31
   5  -5  -4    0.78    0.29
  -5   5   4    0.97    0.27
  -5   5   4    1.05    0.32
   4  -5  -4   25.44    1.22
  -4   5   4   24.91    1.09
  -4   5   4   25.21    0.90
   3  -5  -4   70.11    2.05
  -3   5   4   68.67    1.52
  -3   5   4   66.98    1.88
   2  -5  -4    7.00    0.58
  -2   5   4    7.53    0.36
  -2   5   4    7.40    0.55
   1  -5  -4   21.27    0.94
   1  -5  -4   20.95    0.55
  -1   5   4   22.02    0.93
   0  -5  -4   45.78    0.85
   0  -5  -4   47.67    1.43
   0   5   4   44.75    1.38
  -1  -5  -4    2.08    0.15
  -1  -5  -4    2.16    0.35
   1   5   4    2.12    0.32
  -2  -5  -4   17.68    0.80
  -2  -5  -4   16.93    0.53
   2   5   4   17.81    0.77
  -3  -5  -4    3.05    0.27
  -3  -5  -4    2.77    0.32
   3   5   4    3.46    0.32
  -4  -5  -4    1.05    0.23
  -4  -5  -4    1.46    0.28
   4   5   4    1.34    0.24
  -5  -5  -4   27.96    1.12
  -5  -5  -4   26.42    0.99
   5   5   4   27.82    0.89
  -6  -5  -4   26.26    1.06
  -6  -5  -4   28.03    1.18
   6   5   4   28.03    0.86
  -7  -5  -4    4.42    0.47
   7   5   4    4.78    0.52
   7   5   4    4.94    0.32
  -8  -5  -4    8.21    0.70
   8   5   4    8.22    0.68
  -9  -5  -4    9.38    0.82
   9   5   4    9.98    0.80
 -10  -5  -4    0.91    0.23
  10   5   4   -0.27    0.15
 -11  -5  -4   13.79    1.05
  11   5   4   12.60    1.01
 -12  -5  -4   13.15    1.09
  12   5   4   12.89    1.19
 -13  -5  -4    3.68    0.79
  13   5   4    5.19    0.92
   9  -6  -4    0.54    0.40
   8  -6  -4    1.46    0.55
   7  -6  -4    2.59    0.64
   6  -6  -4    3.05    0.64
  -6   6   4    3.25    0.52
   5  -6  -4    1.45    0.45
  -5   6   4    2.08    0.34
  -5   6   4    1.73    0.33
   4  -6  -4   69.86    2.24
  -4   6   4   69.82    2.01
  -4   6   4   68.50    1.71
   3  -6  -4    5.87    0.59
  -3   6   4    7.07    0.43
  -3   6   4    6.20    0.57
   2  -6  -4   -0.06    0.12
  -2   6   4    0.03    0.08
  -2   6   4    0.18    0.23
   1  -6  -4    0.90    0.16
   1  -6  -4    0.72    0.25
  -1   6   4    0.60    0.26
   0  -6  -4    9.92    0.64
   0  -6  -4    8.83    0.38
   0   6   4   10.30    0.68
  -1  -6  -4    0.93    0.15
  -1  -6  -4    1.22    0.27
   1   6   4    0.44    0.20
  -2  -6  -4    4.99    0.45
  -2  -6  -4    5.27    0.32
   2   6   4    5.13    0.45
  -3  -6  -4    5.35    0.47
  -3  -6  -4    5.00    0.37
   3   6   4    4.45    0.40
  -4  -6  -4   29.57    1.13
  -4  -6  -4   30.70    1.02
   4   6   4   30.20    1.06
  -5  -6  -4    0.38    0.12
   5   6   4   -0.02    0.09
  -6  -6  -4    0.47    0.19
  -6  -6  -4    0.24    0.13
   6   6   4    0.28    0.12
  -7  -6  -4    6.93    0.58
   7   6   4    7.67    0.64
   7   6   4    7.53    0.46
  -8  -6  -4    2.97    0.49
   8   6   4    3.66    0.57
  -9  -6  -4    4.11    0.68
   9   6   4    4.09    0.62
 -10  -6  -4   23.94    1.40
  10   6   4   23.72    1.33
 -11  -6  -4    0.90    0.31
  11   6   4    1.00    0.30
  12   6   4    0.56    0.36
   8  -7  -4    3.62    0.70
   7  -7  -4    0.59    0.38
   6  -7  -4    2.40    0.58
  -6   7   4    2.37    0.40
   5  -7  -4    9.40    0.84
  -5   7   4    9.22    0.73
   4  -7  -4   18.35    1.13
  -4   7   4   17.91    1.00
  -4   7   4   14.18    1.04
   3  -7  -4    8.55    0.70
  -3   7   4    6.71    0.61
  -3   7   4    7.37    0.48
   2  -7  -4   23.63    0.83
   2  -7  -4   22.98    1.13
  -2   7   4   23.64    1.11
   1  -7  -4   -0.13    0.08
   1  -7  -4    0.02    0.14
  -1   7   4    0.47    0.12
   0  -7  -4    0.42    0.18
   0  -7  -4    0.74    0.15
   0   7   4    0.79    0.22
  -1  -7  -4    4.45    0.33
  -1  -7  -4    3.30    0.40
   1   7   4    4.44    0.47
  -2  -7  -4   -0.01    0.15
  -2  -7  -4    0.22    0.15
   2   7   4    0.12    0.12
  -3  -7  -4   16.91    0.73
  -3  -7  -4   17.77    0.88
   3   7   4   17.00    0.85
  -4  -7  -4   72.34    1.99
  -4  -7  -4   74.96    1.86
   4   7   4   75.87    1.97
  -5  -7  -4    1.52    0.34
  -5  -7  -4    2.38    0.39
   5   7   4    2.25    0.37
  -6  -7  -4   10.70    0.74
  -6  -7  -4   10.77    0.74
   6   7   4   10.35    0.62
  -7  -7  -4    1.33    0.37
   7   7   4    1.48    0.29
   7   7   4    1.19    0.35
  -8  -7  -4    5.89    0.61
   8   7   4    5.64    0.66
   8   7   4    5.40    0.57
  -9  -7  -4   12.07    0.90
   9   7   4   12.01    0.92
 -10  -7  -4    1.27    0.41
  10   7   4    1.57    0.40
 -11  -7  -4    4.31    0.86
  11   7   4    4.80    0.82
 -12  -7  -4   10.51    1.00
  12   7   4    9.86    1.01
   7  -8  -4   10.14    1.03
   6  -8  -4    2.08    0.58
   5  -8  -4    2.90    0.59
  -5   8   4    3.01    0.56
   4  -8  -4    9.31    0.79
  -4   8   4    8.40    0.74
   3  -8  -4    0.98    0.32
  -3   8   4    1.89    0.41
   2  -8  -4    6.08    0.62
  -2   8   4    6.14    0.63
   1  -8  -4   55.83    1.86
   1  -8  -4   57.04    1.48
  -1   8   4   58.64    1.92
   0  -8  -4   17.26    0.94
   0  -8  -4   17.50    0.73
   0   8   4   18.44    1.03
  -1  -8  -4    4.57    0.45
  -1  -8  -4    3.91    0.38
   1   8   4    3.86    0.57
  -2  -8  -4   47.28    1.36
  -2  -8  -4   49.92    1.63
   2   8   4   49.44    1.67
  -3  -8  -4   19.39    0.85
  -3  -8  -4   20.69    0.99
   3   8   4   20.31    1.02
  -4  -8  -4    3.26    0.47
  -4  -8  -4    2.82    0.43
   4   8   4    2.89    0.46
  -5  -8  -4    2.17    0.41
  -5  -8  -4    1.36    0.34
   5   8   4    0.96    0.28
  -6  -8  -4   20.98    1.06
  -6  -8  -4   21.77    1.10
   6   8   4   23.45    1.05
  -7  -8  -4   10.47    0.85
   7   8   4   10.21    0.74
   7   8   4   11.21    0.70
  -8  -8  -4    3.96    0.68
   8   8   4    3.86    0.61
   8   8   4    4.21    0.40
  -9  -8  -4    0.71    0.29
   9   8   4    0.11    0.16
 -10  -8  -4    1.06    0.29
  10   8   4    0.41    0.31
 -11  -8  -4   -0.17    0.29
  11   8   4    0.10    0.25
 -12  -8  -4    1.08    0.41
  12   8   4    1.80    0.63
   6  -9  -4    8.06    0.80
   5  -9  -4    5.90    0.88
  -5   9   4    7.18    0.70
   4  -9  -4    0.93    0.27
  -4   9   4    0.70    0.33
   3  -9  -4    9.22    0.80
  -3   9   4   10.03    0.83
   2  -9  -4   15.25    0.98
  -2   9   4   14.16    0.98
   1  -9  -4   19.99    1.06
  -1   9   4   17.53    1.08
   0  -9  -4   29.42    1.30
   0   9   4   27.82    1.34
  -1  -9  -4   39.88    1.30
  -1  -9  -4   39.39    1.49
   1   9   4   40.15    1.61
  -2  -9  -4    0.38    0.13
  -2  -9  -4    0.46    0.20
   2   9   4   -0.09    0.20
  -3  -9  -4    3.92    0.46
  -3  -9  -4    5.31    0.53
   3   9   4    4.37    0.62
  -4  -9  -4    2.39    0.43
  -4  -9  -4    2.57    0.45
   4   9   4    2.52    0.53
  -5  -9  -4    1.54    0.30
  -5  -9  -4    1.00    0.35
   5   9   4    0.50    0.31
  -6  -9  -4    0.45    0.23
  -6  -9  -4   -0.02    0.16
   6   9   4    0.17    0.17
  -7  -9  -4    8.11    0.75
   7   9   4    6.73    0.59
   7   9   4    6.75    0.63
  -8  -9  -4    5.64    0.85
   8   9   4    4.74    0.55
   8   9   4    5.57    0.52
  -9  -9  -4   -0.37    0.18
   9   9   4    0.09    0.20
 -10  -9  -4   17.20    1.24
  10   9   4   18.30    1.18
 -11  -9  -4    0.08    0.34
  11   9   4   -0.33    0.29
   5 -10  -4    7.59    0.86
  -5  10   4    7.49    0.84
   4 -10  -4    5.31    0.64
  -4  10   4    4.90    0.84
   3 -10  -4    4.58    0.72
  -3  10   4    3.28    0.68
   2 -10  -4    5.26    0.62
  -2  10   4    5.67    0.66
   1 -10  -4    8.85    0.76
  -1  10   4    8.66    0.83
   0 -10  -4    1.81    0.45
   0  10   4    1.91    0.48
  -1 -10  -4    2.80    0.52
   1  10   4    2.60    0.55
  -2 -10  -4    7.07    0.63
  -2 -10  -4    6.74    0.57
   2  10   4    7.40    0.73
  -3 -10  -4    4.82    0.51
  -3 -10  -4    4.59    0.54
   3  10   4    5.01    0.57
  -4 -10  -4    1.18    0.32
  -4 -10  -4    1.06    0.30
   4  10   4    0.51    0.30
  -5 -10  -4   32.87    1.33
  -5 -10  -4   31.35    1.38
   5  10   4   32.67    1.46
  -6 -10  -4    4.63    0.51
  -6 -10  -4    5.00    0.75
   6  10   4    4.69    0.56
  -7 -10  -4    0.08    0.30
   7  10   4    0.27    0.20
   7  10   4    0.07    0.17
  -8 -10  -4    3.97    0.75
   8  10   4    3.75    0.63
   8  10   4    4.03    0.77
  -9 -10  -4   14.57    1.11
 -10 -10  -4    1.67    0.51
  -4  11   4    2.31    0.68
  -3  11   4    1.09    0.49
  -2  11   4    8.75    0.91
  -1  11   4    4.57    0.71
   0  11   4    1.94    0.49
   1  11   4    2.07    0.53
   2  11   4    0.74    0.38
   3  11   4    0.61    0.30
  -4 -11  -4    6.26    0.62
   4  11   4    5.43    0.64
  -5 -11  -4    2.87    0.52
   5  11   4    2.57    0.56
  -6 -11  -4   14.13    1.01
   6  11   4   13.86    1.00
  -7 -11  -4    8.58    0.83
   7  11   4    9.60    0.80
  -8 -11  -4    5.39    0.85
   8  11   4    4.49    0.72
  -9 -11  -4    5.94    0.92
  -2  12   4   -0.23    0.32
  -1  12   4    0.68    0.36
   0  12   4    0.28    0.40
   1  12   4   15.54    1.16
   2  12   4    9.10    0.95
   3  12   4    0.17    0.36
   4  12   4    0.67    0.34
   5  12   4    1.21    0.47
  -6 -12  -4    1.11    0.66
   6  12   4    0.61    0.38
  -7 -12  -4    2.64    0.55
   7  12   4    1.81    0.51
  -8 -12  -4    8.45    0.89
   8  12   4    7.58    0.76
   1  13   4   -0.22    0.30
   2  13   4    1.47    0.43
   3  13   4    6.21    0.99
   4  13   4    5.46    0.94
   5  13   4   10.81    1.01
   6  13   4    2.10    0.51
   5   8  -5    0.15    0.45
  -5  -8   5    0.37    0.35
   4   8  -5    2.55    0.60
  -4  -8   5    3.27    0.70
   3   8  -5    8.37    0.93
  -3  -8   5    8.85    1.04
   2   8  -5   16.92    1.15
  -2  -8   5   12.75    1.20
   1   8  -5    6.37    0.97
  -1  -8   5    4.81    0.90
   0   8  -5    4.52    0.79
   0  -8   5    5.40    0.93
  -1   8  -5   11.32    0.97
   1  -8   5   12.14    1.14
  -2   8  -5    1.10    0.55
   2  -8   5    1.04    0.47
   3  -8   5   -0.05    0.28
  -4   8  -5    0.56    0.38
   4  -8   5   -0.49    0.30
   6   7  -5    0.81    0.41
  -6  -7   5    0.84    0.54
   5   7  -5    7.59    0.79
  -5  -7   5    7.74    1.16
   4   7  -5    3.42    0.60
  -4  -7   5    2.64    0.70
   3   7  -5   14.49    1.09
  -3  -7   5   13.35    1.17
   2   7  -5    2.61    0.56
  -2  -7   5    3.67    0.75
   1   7  -5    0.30    0.21
  -1  -7   5   -0.11    0.24
   0   7  -5   19.08    1.20
   0  -7   5   17.46    1.28
  -1   7  -5    6.34    0.76
   1  -7   5    8.69    0.95
  -2   7  -5    7.93    0.82
   2  -7   5    7.40    0.86
  -3   7  -5   11.96    0.94
   3  -7   5   10.43    1.04
  -4   7  -5    1.88    0.44
   4  -7   5    1.75    0.62
  -5   7  -5    5.08    0.77
   5  -7   5    3.88    0.81
   6  -7   5    1.30    0.58
   7   6  -5    3.25    0.64
  -7  -6   5    3.58    0.74
   6   6  -5   -0.02    0.29
  -6  -6   5    0.94    0.27
   5   6  -5    1.96    0.52
  -5  -6   5    1.09    0.47
   4   6  -5    1.87    0.47
  -4  -6   5    2.11    0.52
   3   6  -5   28.34    1.41
  -3  -6   5   27.09    1.53
   2   6  -5    3.97    0.63
  -2  -6   5    4.58    0.72
   1   6  -5   -0.21    0.22
  -1  -6   5   -0.02    0.18
   0   6  -5    3.84    0.65
   0  -6   5    3.53    0.69
  -1   6  -5    1.18    0.39
   1  -6   5    1.13    0.35
  -2   6  -5    0.59    0.30
   2  -6   5    1.13    0.36
  -3   6  -5    1.67    0.42
   3  -6   5    1.48    0.44
  -4   6  -5   16.63    1.05
   4  -6   5   19.08    1.28
  -5   6  -5    2.71    0.49
   5  -6   5    2.76    0.66
   6  -6   5    0.44    0.40
   7  -6   5    3.44    0.78
  -8  -5   5    5.55    0.90
   7   5  -5    0.39    0.21
  -7  -5   5   -0.08    0.33
   6   5  -5    1.27    0.34
  -6  -5   5    0.94    0.43
   5   5  -5    4.07    0.63
  -5  -5   5    3.88    0.76
   4   5  -5   25.37    1.30
  -4  -5   5   24.65    1.41
   3   5  -5    7.06    0.66
  -3  -5   5    5.96    0.71
   2   5  -5    2.53    0.50
  -2  -5   5    3.65    0.65
   1   5  -5   33.34    1.44
  -1  -5   5   28.83    1.45
   0   5  -5    0.14    0.12
   0  -5   5    0.00    0.20
  -1   5  -5    0.25    0.17
   1  -5   5    0.46    0.21
  -2   5  -5    2.38    0.47
   2  -5   5    1.86    0.49
  -3   5  -5    2.77    0.55
   3  -5   5    3.68    0.62
  -4   5  -5    1.17    0.31
   4  -5   5    1.52    0.37
  -5   5  -5   10.93    0.78
   5  -5   5   10.25    0.90
  -6   5  -5   16.47    0.98
   6  -5   5   14.86    1.12
  -7   5  -5   -0.16    0.17
  -8   5  -5    1.89    0.42
  -9  -4   5    0.27    0.48
  -8  -4   5    0.07    0.32
   7   4  -5   10.70    0.85
  -7  -4   5   10.47    0.97
   6   4  -5    1.42    0.34
  -6  -4   5    0.86    0.38
   5   4  -5    1.98    0.41
  -5  -4   5    2.02    0.50
   4   4  -5   43.73    1.66
  -4  -4   5   43.59    1.79
   3   4  -5    0.35    0.28
  -3  -4   5    0.59    0.26
   2   4  -5    1.89    0.44
  -2  -4   5    2.16    0.43
   1   4  -5    0.60    0.30
  -1  -4   5    0.85    0.28
   0   4  -5    0.42    0.16
   0  -4   5   -0.03    0.12
  -1   4  -5    1.53    0.38
   1  -4   5    1.91    0.44
  -2   4  -5    0.35    0.20
   2  -4   5    0.29    0.19
  -3   4  -5    1.06    0.28
   3  -4   5    1.23    0.34
  -4   4  -5   18.36    0.98
   4  -4   5   19.55    1.18
  -5   4  -5    4.39    0.69
  -5   4  -5    4.52    0.48
  -6   4  -5   13.77    1.02
  -6   4  -5   14.70    0.83
  -7   4  -5   15.21    1.12
  -8   4  -5    0.23    0.42
  -9   4  -5    0.22    0.44
  -9  -3   5   11.15    1.04
  -8  -3   5    6.38    0.95
   7   3  -5    0.17    0.21
  -7  -3   5    0.28    0.30
   6   3  -5    2.59    0.50
  -6  -3   5    2.90    0.59
   5   3  -5   21.11    1.10
  -5  -3   5   21.35    1.21
   4   3  -5   14.45    0.88
  -4  -3   5   14.06    0.94
   3   3  -5   41.30    1.51
  -3  -3   5   40.53    1.60
   2   3  -5   33.77    1.33
  -2  -3   5   35.33    1.43
   1   3  -5    4.69    0.46
  -1  -3   5    4.41    0.51
   0   3  -5    3.68    0.44
   0  -3   5    2.95    0.50
  -1   3  -5   35.07    1.31
   1  -3   5   33.89    1.36
  -2   3  -5   21.47    0.97
   2  -3   5   19.44    0.61
   2  -3   5   20.41    1.05
  -3   3  -5   15.20    0.81
   3  -3   5   15.30    0.59
   3  -3   5   15.43    0.93
  -4   3  -5   44.53    1.44
  -4   3  -5   41.74    1.60
   4  -3   5   43.78    1.23
  -5   3  -5   13.76    0.92
  -5   3  -5   13.52    0.77
   5  -3   5   13.13    0.71
  -6   3  -5    5.79    0.49
  -6   3  -5    6.40    0.72
   6  -3   5    5.86    0.54
  -7   3  -5    2.99    0.56
   7  -3   5    2.73    0.49
  -8   3  -5    5.17    0.81
   8  -3   5    5.19    0.73
  -9   3  -5    1.94    0.49
   9  -3   5    1.26    0.49
 -10   3  -5    0.92    0.44
  10  -3   5    2.28    0.53
  -9  -2   5    3.95    0.67
   8   2  -5   27.39    1.33
  -8  -2   5   28.18    1.54
   7   2  -5   20.93    1.08
   7   2  -5   20.96    1.10
  -7  -2   5   20.19    1.22
   6   2  -5    4.48    0.50
   6   2  -5    4.89    0.54
  -6  -2   5    4.91    0.71
   5   2  -5    9.68    0.70
   5   2  -5   10.54    0.64
  -5  -2   5    8.99    0.77
   4   2  -5   42.05    1.27
   4   2  -5   41.95    1.50
  -4  -2   5   41.54    1.58
   3   2  -5    8.02    0.47
   3   2  -5    8.22    0.61
  -3  -2   5    7.27    0.63
   2   2  -5    0.58    0.21
   2   2  -5    0.31    0.11
  -2  -2   5    0.29    0.16
   1   2  -5   22.40    0.63
   1   2  -5   20.97    0.97
  -1  -2   5   21.80    1.00
   0   2  -5   63.38    1.76
   0   2  -5   60.99    1.16
   0  -2   5   62.11    1.81
  -1   2  -5   37.38    1.28
   1  -2   5   35.79    0.81
   1  -2   5   35.60    1.30
  -2   2  -5    0.05    0.12
   2  -2   5    0.00    0.14
   2  -2   5    0.26    0.10
  -3   2  -5   22.09    0.92
  -3   2  -5   20.84    1.00
   3  -2   5   21.66    0.73
  -4   2  -5   18.17    0.97
  -4   2  -5   16.24    0.80
   4  -2   5   17.06    0.73
  -5   2  -5    7.47    0.64
  -5   2  -5    8.02    0.54
   5  -2   5    7.63    0.55
  -6   2  -5   11.09    0.80
  -6   2  -5   10.43    0.62
   6  -2   5   11.10    0.71
  -7   2  -5    3.51    0.60
   7  -2   5    3.41    0.53
  -8   2  -5    6.72    0.74
   8  -2   5    6.68    0.68
  -9   2  -5    1.47    0.45
   9  -2   5    1.69    0.43
 -10   2  -5    4.66    0.78
  10  -2   5    5.19    0.84
 -11   2  -5    0.92    0.39
  11  -2   5    0.50    0.35
  10   1  -5    2.74    0.54
 -10  -1   5    1.43    0.59
   9   1  -5    3.33    0.64
  -9  -1   5    3.27    0.64
   8   1  -5    8.80    0.79
  -8  -1   5    9.14    0.82
   7   1  -5    2.20    0.44
   7   1  -5    2.52    0.47
  -7  -1   5    3.29    0.62
   6   1  -5   16.73    0.90
   6   1  -5   16.45    0.93
  -6  -1   5   17.05    1.04
   5   1  -5   56.16    1.76
   5   1  -5   53.60    1.65
  -5  -1   5   52.30    1.80
   4   1  -5    0.22    0.14
   4   1  -5    1.28    0.24
  -4  -1   5    0.07    0.15
   3   1  -5   11.53    0.70
   3   1  -5   12.17    0.62
  -3  -1   5   10.90    0.70
   2   1  -5   -0.03    0.10
   2   1  -5    0.10    0.13
  -2  -1   5   -0.08    0.12
   1   1  -5   22.59    0.95
   1   1  -5   21.99    0.72
  -1  -1   5   21.95    0.92
   0   1  -5  105.74    2.38
   0   1  -5  106.10    1.96
   0  -1   5  104.80    2.36
  -1   1  -5   26.38    1.00
  -1   1  -5   27.19    0.77
   1  -1   5   26.97    1.01
  -2   1  -5   12.43    0.51
  -2   1  -5   12.04    0.65
   2  -1   5   10.82    0.65
  -3   1  -5    3.61    0.37
  -3   1  -5    3.44    0.39
   3  -1   5    3.88    0.30
  -4   1  -5   -0.01    0.07
   4  -1   5   -0.06    0.07
  -5   1  -5    8.19    0.63
   5  -1   5    7.84    0.53
  -6   1  -5    0.22    0.21
   6  -1   5    0.17    0.13
  -7   1  -5   42.66    1.69
   7  -1   5   42.92    1.58
  -8   1  -5   19.82    1.20
   8  -1   5   20.08    1.12
  -9   1  -5    7.78    0.78
   9  -1   5    6.74    0.71
 -10   1  -5   11.84    1.08
  10  -1   5   11.53    1.00
 -11   1  -5    0.94    0.48
  11  -1   5    1.07    0.48
  10   0  -5    4.36    0.71
 -10   0   5    3.88    0.72
   9   0  -5    1.43    0.44
  -9   0   5    1.66    0.55
   8   0  -5    5.23    0.63
  -8   0   5    6.34    0.65
   7   0  -5   15.19    0.99
  -7   0   5   17.30    1.04
  -7   0   5   17.16    0.92
   6   0  -5   16.20    0.93
   6   0  -5   16.46    0.90
  -6   0   5   16.27    0.95
   5   0  -5   21.41    1.03
   5   0  -5   20.46    0.98
  -5   0   5   21.42    1.04
   4   0  -5   17.53    0.85
   4   0  -5   19.04    0.92
  -4   0   5   18.24    0.90
   3   0  -5   20.46    0.94
   3   0  -5   21.89    0.88
  -3   0   5   20.60    0.89
   2   0  -5    4.55    0.37
   2   0  -5    4.53    0.41
  -2   0   5    4.99    0.41
   1   0  -5   25.59    0.85
   1   0  -5   25.28    0.98
  -1   0   5   25.79    0.91
   0   0  -5    1.24    0.21
   0   0  -5    1.59    0.28
   0   0   5    1.33    0.25
  -1   0  -5   15.64    0.71
  -1   0  -5   15.77    0.62
   1   0   5   16.00    0.69
  -2   0  -5   14.66    0.67
  -2   0  -5   15.00    0.68
  -2   0  -5   14.53    0.60
  -3   0  -5   11.09    0.56
  -3   0  -5   10.50    0.56
  -3   0  -5   11.01    0.61
  -4   0  -5   11.04    0.56
  -4   0  -5   11.05    0.66
   4   0   5   10.66    0.58
  -5   0  -5    2.20    0.30
  -5   0  -5    2.02    0.38
   5   0   5    2.25    0.35
  -6   0  -5   12.23    0.56
  -6   0  -5   12.33    0.79
   6   0   5   11.72    0.72
  -7   0  -5   51.22    1.78
   7   0   5   48.38    1.67
  -8   0  -5    0.22    0.14
   8   0   5    0.22    0.19
  -9   0  -5   31.66    1.56
   9   0   5   30.36    1.49
 -10   0  -5    1.96    0.59
  10   0   5    1.26    0.41
 -11   0  -5    2.33    0.67
  11   0   5    1.49    0.50
 -12   0  -5    4.04    0.73
  12   0   5    4.34    0.93
  10  -1  -5    8.47    0.94
 -10   1   5    8.47    0.84
   9  -1  -5   12.29    1.06
  -9   1   5   14.38    1.00
   8  -1  -5    1.23    0.41
  -8   1   5    0.86    0.35
   7  -1  -5    0.79    0.29
  -7   1   5    1.12    0.32
  -7   1   5    1.75    0.41
   6  -1  -5   12.26    0.84
  -6   1   5   12.74    0.80
  -6   1   5   12.69    0.81
   5  -1  -5    0.46    0.26
  -5   1   5    0.11    0.10
  -5   1   5    0.24    0.16
   4  -1  -5   11.25    0.70
   4  -1  -5   10.71    0.67
  -4   1   5   11.67    0.67
   3  -1  -5    2.36    0.38
   3  -1  -5    2.27    0.36
  -3   1   5    2.22    0.34
   2  -1  -5    2.21    0.35
   2  -1  -5    2.32    0.35
  -2   1   5    2.27    0.25
   1  -1  -5   60.43    1.61
   1  -1  -5   58.74    1.50
  -1   1   5   59.43    1.40
   0  -1  -5    2.89    0.29
   0  -1  -5    2.21    0.34
   0   1   5    2.12    0.22
  -1  -1  -5   14.09    0.67
  -1  -1  -5   13.85    0.61
   1   1   5   14.66    0.57
  -2  -1  -5   20.10    0.76
  -2  -1  -5   19.62    0.77
  -2  -1  -5   20.48    0.72
  -3  -1  -5    3.07    0.31
  -3  -1  -5    2.68    0.27
  -3  -1  -5    2.84    0.28
  -4  -1  -5    1.72    0.29
  -4  -1  -5    2.29    0.33
  -4  -1  -5    1.90    0.28
  -5  -1  -5    0.39    0.16
  -5  -1  -5    0.27    0.12
   5   1   5    0.36    0.14
  -6  -1  -5   29.46    1.20
  -6  -1  -5   28.65    0.84
   6   1   5   28.89    1.16
  -7  -1  -5    5.59    0.57
   7   1   5    5.80    0.56
  -8  -1  -5   14.05    0.96
   8   1   5   16.20    0.96
  -9  -1  -5   12.98    0.97
   9   1   5   12.32    0.91
  10   1   5    0.11    0.19
 -11  -1  -5   19.89    1.33
  11   1   5   18.49    1.27
 -12  -1  -5    2.12    0.49
  12   1   5    0.24    0.30
  10  -2  -5    2.79    0.65
   9  -2  -5    6.05    0.92
  -9   2   5    5.86    0.66
   8  -2  -5    6.00    0.90
  -8   2   5    7.10    0.63
   7  -2  -5    0.53    0.28
  -7   2   5    0.56    0.23
   6  -2  -5   23.41    1.25
  -6   2   5   26.04    1.12
  -6   2   5   24.90    1.13
   5  -2  -5   33.82    1.41
  -5   2   5   32.53    1.18
  -5   2   5   32.76    1.26
   4  -2  -5   21.25    1.01
  -4   2   5   20.20    0.95
  -4   2   5   21.81    0.87
   3  -2  -5    0.10    0.13
  -3   2   5    0.32    0.13
   2  -2  -5    5.80    0.47
  -2   2   5    5.34    0.34
  -2   2   5    5.74    0.46
   1  -2  -5    4.77    0.40
   1  -2  -5    4.24    0.38
  -1   2   5    4.45    0.28
   0  -2  -5  145.24    2.89
   0  -2  -5  146.82    2.86
   0   2   5  150.46    2.45
  -1  -2  -5  153.97    2.90
  -1  -2  -5  148.75    2.89
   1   2   5  152.02    2.51
  -2  -2  -5   18.68    0.75
  -2  -2  -5   18.52    0.61
  -2  -2  -5   19.09    0.77
  -3  -2  -5    0.02    0.13
  -3  -2  -5    0.02    0.12
  -3  -2  -5    0.06    0.09
  -4  -2  -5    7.80    0.48
  -4  -2  -5    8.11    0.54
  -5  -2  -5   34.73    1.16
  -5  -2  -5   33.43    1.21
   5   2   5   33.93    0.94
  -6  -2  -5   23.40    1.02
   6   2   5   21.85    1.01
   6   2   5   21.91    0.68
  -7  -2  -5    3.54    0.41
   7   2   5    2.80    0.48
  -8  -2  -5   28.17    1.28
   8   2   5   28.64    1.32
  -9  -2  -5    3.48    0.56
   9   2   5    3.57    0.60
 -10  -2  -5   15.85    1.10
  10   2   5   16.57    1.11
 -11  -2  -5    2.38    0.64
  11   2   5    1.68    0.54
 -12  -2  -5    2.56    0.66
  12   2   5    1.83    0.57
   9  -3  -5    4.17    0.75
   8  -3  -5   -0.01    0.31
  -8   3   5    0.31    0.26
   7  -3  -5   12.34    0.98
  -7   3   5   12.52    0.78
   6  -3  -5    2.64    0.52
  -6   3   5    2.08    0.42
  -6   3   5    3.48    0.38
   5  -3  -5    7.86    0.70
  -5   3   5    8.61    0.55
  -5   3   5    8.94    0.64
   4  -3  -5   16.10    0.93
  -4   3   5   17.49    0.91
  -4   3   5   17.71    0.75
   3  -3  -5   30.48    1.22
  -3   3   5   29.68    0.89
  -3   3   5   30.29    1.18
   2  -3  -5    9.45    0.62
  -2   3   5    9.38    0.39
  -2   3   5    9.66    0.61
   1  -3  -5   11.82    0.68
  -1   3   5   10.59    0.63
  -1   3   5   10.42    0.35
   0  -3  -5  116.86    2.49
   0   3   5  113.04    1.74
   0   3   5  115.04    1.77
   0   3   5  114.18    2.47
  -1  -3  -5   22.88    0.89
   1   3   5   22.54    0.51
   1   3   5   22.40    0.88
  -2  -3  -5  118.28    1.99
  -2  -3  -5  115.98    2.48
   2   3   5  119.65    2.43
  -3  -3  -5   47.96    1.40
  -3  -3  -5   46.28    1.10
   3   3   5   46.12    1.26
  -4  -3  -5    6.62    0.41
  -4  -3  -5    6.39    0.51
   4   3   5    6.37    0.41
  -5  -3  -5   10.32    0.66
  -5  -3  -5    9.52    0.55
   5   3   5   10.03    0.48
  -6  -3  -5   15.92    0.79
   6   3   5   16.61    0.88
   6   3   5   16.75    0.58
  -7  -3  -5    4.17    0.44
   7   3   5    4.85    0.50
   7   3   5    4.63    0.25
  -8  -3  -5    0.31    0.23
   8   3   5    0.33    0.25
  -9  -3  -5    0.84    0.33
   9   3   5    0.21    0.25
 -10  -3  -5   11.59    0.92
  10   3   5   14.32    1.02
 -11  -3  -5    3.12    0.56
  11   3   5    2.99    0.61
 -12  -3  -5    0.44    0.33
  12   3   5    0.15    0.30
 -13  -3  -5    2.07    0.65
   9  -4  -5    7.01    0.80
   8  -4  -5    2.52    0.62
   7  -4  -5    1.49    0.50
   6  -4  -5    2.62    0.50
  -6   4   5    2.24    0.40
  -6   4   5    3.01    0.47
   5  -4  -5   21.67    1.18
  -5   4   5   20.97    1.02
  -5   4   5   21.88    0.89
   4  -4  -5    7.58    0.70
  -4   4   5    8.43    0.63
  -4   4   5    8.57    0.48
   3  -4  -5   29.94    1.27
  -3   4   5   30.28    1.21
  -3   4   5   31.70    0.88
   2  -4  -5  225.90    4.37
  -2   4   5  220.33    3.43
  -2   4   5  220.98    4.19
   1  -4  -5    0.32    0.07
   1  -4  -5    0.07    0.12
  -1   4   5    0.30    0.17
  -1   4   5    0.34    0.06
   0  -4  -5   65.93    1.79
   0   4   5   67.00    1.76
  -1  -4  -5   56.96    1.59
   1   4   5   55.29    1.53
  -2  -4  -5   56.18    1.03
  -2  -4  -5   56.98    1.59
   2   4   5   56.77    1.51
  -3  -4  -5    3.99    0.26
  -3  -4  -5    3.36    0.36
   3   4   5    3.82    0.34
  -4  -4  -5   81.69    1.73
  -4  -4  -5   80.95    2.06
   4   4   5   84.13    1.85
  -5  -4  -5   20.05    0.97
  -5  -4  -5   20.26    0.81
   5   4   5   20.68    0.74
  -6  -4  -5    0.25    0.19
  -6  -4  -5    0.63    0.16
   6   4   5    0.18    0.11
  -7  -4  -5    0.15    0.12
   7   4   5    0.12    0.14
   7   4   5    0.08    0.07
  -8  -4  -5   10.76    0.75
   8   4   5    9.74    0.78
  -9  -4  -5    0.11    0.16
   9   4   5    0.41    0.22
 -10  -4  -5   -0.05    0.23
  10   4   5    0.64    0.21
 -11  -4  -5   12.23    1.03
  11   4   5   13.57    1.08
 -12  -4  -5   15.42    1.19
  12   4   5   15.48    1.24
 -13  -4  -5    2.20    0.52
  13   4   5    2.46    0.54
   9  -5  -5    3.36    0.59
   8  -5  -5    4.81    0.84
   7  -5  -5    4.22    0.78
   6  -5  -5    9.74    0.89
  -6   5   5   10.48    0.78
   5  -5  -5    0.21    0.29
  -5   5   5    0.91    0.30
  -5   5   5    0.59    0.24
   4  -5  -5   66.68    2.19
  -4   5   5   70.59    2.04
  -4   5   5   70.18    1.64
   3  -5  -5  137.56    3.30
  -3   5   5  132.45    3.03
  -3   5   5  135.52    2.43
   2  -5  -5   11.29    0.76
  -2   5   5   11.41    0.40
  -2   5   5   11.29    0.71
   1  -5  -5   51.87    0.84
   1  -5  -5   50.80    1.63
  -1   5   5   53.96    1.62
   0  -5  -5   12.16    0.73
   0   5   5   12.62    0.71
  -1  -5  -5    1.73    0.32
   1   5   5    2.24    0.35
  -2  -5  -5    6.48    0.24
  -2  -5  -5    5.99    0.49
   2   5   5    6.30    0.47
  -3  -5  -5    8.39    0.59
  -3  -5  -5    8.20    0.38
   3   5   5    8.66    0.53
  -4  -5  -5   12.50    0.74
  -4  -5  -5   12.89    0.57
   4   5   5   13.02    0.65
  -5  -5  -5    0.26    0.17
  -5  -5  -5    0.09    0.15
   5   5   5    0.02    0.06
  -6  -5  -5   21.03    1.04
  -6  -5  -5   20.83    0.92
   6   5   5   21.31    0.76
  -7  -5  -5   12.01    0.75
   7   5   5   12.47    0.53
  -8  -5  -5    9.63    0.73
   8   5   5    9.90    0.78
  -9  -5  -5    2.85    0.52
   9   5   5    3.45    0.61
 -10  -5  -5    9.59    0.80
  10   5   5    9.89    0.85
 -11  -5  -5    3.45    0.63
  11   5   5    4.83    0.87
 -12  -5  -5    2.21    0.66
  12   5   5    2.81    0.65
 -13  -5  -5    1.32    0.43
  13   5   5    0.47    0.41
   8  -6  -5   15.55    1.27
   7  -6  -5    9.97    0.94
   6  -6  -5    3.15    0.64
  -6   6   5    4.26    0.63
   5  -6  -5    8.00    0.78
  -5   6   5    7.03    0.66
   4  -6  -5    0.25    0.26
  -4   6   5    1.14    0.22
   3  -6  -5    5.60    0.61
  -3   6   5    5.65    0.42
  -3   6   5    4.95    0.56
   2  -6  -5    1.73    0.36
  -2   6   5    1.39    0.16
  -2   6   5    1.42    0.36
   1  -6  -5   18.37    0.47
   1  -6  -5   18.39    0.96
  -1   6   5   18.39    0.95
   0  -6  -5    0.81    0.29
   0   6   5    0.70    0.27
  -1  -6  -5   17.07    0.40
  -1  -6  -5   19.35    0.93
  -1  -6  -5   17.17    0.39
   1   6   5   17.22    0.87
  -2  -6  -5    2.95    0.21
  -2  -6  -5    3.44    0.39
   2   6   5    3.24    0.46
  -3  -6  -5   16.57    0.85
  -3  -6  -5   15.19    0.57
   3   6   5   15.57    0.78
  -4  -6  -5  124.16    2.87
  -4  -6  -5  122.90    2.40
   4   6   5  124.34    2.65
  -5  -6  -5   -0.05    0.14
  -5  -6  -5    0.15    0.15
   5   6   5    0.26    0.09
  -6  -6  -5   10.29    0.76
  -6  -6  -5   10.31    0.64
   6   6   5   10.06    0.56
  -7  -6  -5    4.83    0.50
   7   6   5    5.15    0.53
   7   6   5    5.51    0.39
  -8  -6  -5    2.48    0.45
   8   6   5    1.84    0.44
  -9  -6  -5    0.98    0.37
   9   6   5    1.23    0.44
 -10  -6  -5    9.64    0.85
  10   6   5    9.54    0.85
 -11  -6  -5   15.85    1.13
  11   6   5   16.45    1.17
 -12  -6  -5    1.36    0.39
  12   6   5    2.04    0.48
   8  -7  -5    1.54    0.36
   7  -7  -5    6.51    0.74
   6  -7  -5    1.46    0.41
  -6   7   5    0.80    0.32
   5  -7  -5    3.00    0.67
  -5   7   5    2.03    0.43
   4  -7  -5    5.20    0.79
  -4   7   5    5.62    0.62
   3  -7  -5    0.03    0.22
  -3   7   5    0.16    0.15
   2  -7  -5   16.74    1.01
  -2   7   5   16.48    0.96
   1  -7  -5   13.57    0.85
  -1   7   5   12.43    0.83
   0  -7  -5   20.55    1.02
   0  -7  -5   20.14    0.69
   0   7   5   20.32    1.04
  -1  -7  -5    1.54    0.37
  -1  -7  -5    1.41    0.19
   1   7   5    1.37    0.35
  -2  -7  -5    2.56    0.25
  -2  -7  -5    3.14    0.50
   2   7   5    2.87    0.45
  -3  -7  -5   57.32    1.36
  -3  -7  -5   57.20    1.77
   3   7   5   58.52    1.73
  -4  -7  -5   53.97    1.43
  -4  -7  -5   51.83    1.70
   4   7   5   51.76    1.59
  -5  -7  -5   10.36    0.74
  -5  -7  -5    9.84    0.62
   5   7   5    9.98    0.63
  -6  -7  -5    9.49    0.63
  -6  -7  -5    9.21    0.72
   6   7   5    8.66    0.57
  -7  -7  -5    1.27    0.30
  -7  -7  -5    2.11    0.41
   7   7   5    1.99    0.35
  -8  -7  -5    0.73    0.21
   8   7   5    0.86    0.26
  -9  -7  -5    2.30    0.50
   9   7   5    3.24    0.62
 -10  -7  -5    2.67    0.62
  10   7   5    2.51    0.49
 -11  -7  -5    0.02    0.26
  11   7   5    0.92    0.38
 -12  -7  -5    8.39    0.82
  12   7   5    6.21    1.01
   7  -8  -5    4.15    0.88
   6  -8  -5    0.09    0.38
   5  -8  -5    0.71    0.37
  -5   8   5    1.01    0.38
   4  -8  -5    0.20    0.29
  -4   8   5    0.09    0.25
   3  -8  -5    1.31    0.41
  -3   8   5    1.39    0.38
   2  -8  -5   12.61    0.90
  -2   8   5   13.08    0.90
   1  -8  -5    3.49    0.56
  -1   8   5    2.48    0.46
   0  -8  -5   21.10    1.09
   0   8   5   20.62    1.08
  -1  -8  -5    8.47    0.69
   1   8   5    8.10    0.68
  -2  -8  -5    0.04    0.12
  -2  -8  -5   -0.18    0.11
   2   8   5    0.28    0.14
  -3  -8  -5   62.14    1.54
  -3  -8  -5   62.34    1.92
   3   8   5   58.76    1.85
  -4  -8  -5   19.25    0.84
  -4  -8  -5   18.48    0.99
   4   8   5   18.70    0.96
  -5  -8  -5    0.07    0.20
  -5  -8  -5   -0.27    0.13
   5   8   5    0.51    0.15
  -6  -8  -5   12.25    0.76
  -6  -8  -5   12.66    0.85
   6   8   5   13.02    0.75
  -7  -8  -5    3.99    0.60
  -7  -8  -5    4.62    0.51
   7   8   5    3.87    0.43
  -8  -8  -5    4.24    0.64
   8   8   5    3.75    0.65
   8   8   5    3.73    0.40
  -9  -8  -5    2.88    0.50
   9   8   5    2.76    0.55
 -10  -8  -5    4.33    0.75
  10   8   5    4.78    0.80
 -11  -8  -5    9.95    1.02
  11   8   5   11.73    0.97
 -12  -8  -5    1.14    0.31
   6  -9  -5    1.94    0.60
   5  -9  -5   12.17    1.00
  -5   9   5   11.49    0.94
   4  -9  -5    1.73    0.44
  -4   9   5    1.82    0.45
   3  -9  -5    5.11    0.75
  -3   9   5    4.39    0.69
   2  -9  -5    1.46    0.40
  -2   9   5    1.11    0.31
   1  -9  -5   28.24    1.35
  -1   9   5   28.65    1.38
   0  -9  -5    2.35    0.51
   0   9   5    2.54    0.50
  -1  -9  -5   28.10    1.30
   1   9   5   25.45    1.26
  -2  -9  -5   46.71    1.71
   2   9   5   46.40    1.73
  -3  -9  -5   13.54    0.89
  -3  -9  -5   13.88    0.72
   3   9   5   12.89    0.89
  -4  -9  -5    9.85    0.66
  -4  -9  -5   10.99    0.80
   4   9   5   11.16    0.82
  -5  -9  -5   38.52    1.53
  -5  -9  -5   40.31    1.41
   5   9   5   39.23    1.49
  -6  -9  -5   32.76    1.42
  -6  -9  -5   33.42    1.37
   6   9   5   30.75    1.31
  -7  -9  -5    0.13    0.18
  -7  -9  -5    0.02    0.16
   7   9   5    0.03    0.16
  -8  -9  -5    7.55    0.74
   8   9   5    6.15    0.56
   8   9   5    6.13    0.65
  -9  -9  -5    2.47    0.49
   9   9   5    2.21    0.58
 -10  -9  -5    0.46    0.29
  10   9   5    0.45    0.33
 -11  -9  -5    5.92    0.98
  11   9   5    5.23    0.81
   5 -10  -5    0.41    0.27
  -5  10   5    1.54    0.33
   4 -10  -5    4.32    0.74
  -4  10   5    4.13    0.71
   3 -10  -5   11.66    1.00
  -3  10   5   12.24    0.99
   2 -10  -5    1.28    0.42
  -2  10   5    1.16    0.49
   1 -10  -5   17.35    1.09
  -1  10   5   15.85    1.10
   0 -10  -5   38.05    1.62
   0  10   5   36.79    1.66
  -1 -10  -5   26.15    1.29
   1  10   5   26.07    1.37
  -2 -10  -5    0.44    0.27
   2  10   5    0.45    0.28
  -3 -10  -5    3.78    0.57
   3  10   5    4.39    0.65
  -4 -10  -5   13.40    0.90
  -4 -10  -5   13.18    0.88
   4  10   5   12.78    0.90
  -5 -10  -5    0.15    0.23
  -5 -10  -5    0.25    0.25
   5  10   5   -0.01    0.27
  -6 -10  -5    4.08    0.62
  -6 -10  -5    3.37    0.52
   6  10   5    3.26    0.53
  -7 -10  -5   17.94    1.10
  -7 -10  -5   17.53    1.06
   7  10   5   19.37    1.07
  -8 -10  -5    0.43    0.28
   8  10   5    0.92    0.30
   8  10   5    0.38    0.26
  -9 -10  -5    3.33    0.63
   9  10   5    3.53    0.68
 -10 -10  -5    2.46    0.70
  10  10   5    2.05    0.58
 -11 -10  -5    4.91    0.81
  11  10   5    4.32    0.78
   4 -11  -5    3.82    0.76
  -4  11   5    3.24    0.76
   3 -11  -5    3.26    0.71
  -3  11   5    3.21    0.67
   2 -11  -5    9.97    0.84
  -2  11   5    9.33    0.89
   1 -11  -5    1.87    0.47
  -1  11   5    3.13    0.53
   0 -11  -5    0.32    0.29
   0  11   5    0.49    0.23
  -1 -11  -5    5.63    0.81
   1  11   5    5.71    0.68
  -2 -11  -5   19.29    1.13
   2  11   5   18.70    1.21
  -3 -11  -5    0.08    0.20
   3  11   5   -0.12    0.20
  -4 -11  -5    5.42    0.59
   4  11   5    5.07    0.72
  -5 -11  -5   11.87    0.83
   5  11   5   11.42    0.92
  -6 -11  -5    0.04    0.31
  -6 -11  -5    0.08    0.27
   6  11   5   -0.21    0.12
  -7 -11  -5   15.84    1.08
  -7 -11  -5   15.29    1.00
   7  11   5   16.05    1.04
  -8 -11  -5    6.03    0.88
   8  11   5    5.32    0.61
  -9 -11  -5   -0.51    0.25
 -10 -11  -5    0.14    0.30
  -2  12   5    5.43    0.94
  -1  12   5    1.81    0.57
   0  12   5    5.36    0.88
   1  12   5    3.77    0.66
   2  12   5    3.94    0.78
   3  12   5    2.18    0.57
   4  12   5    4.59    0.73
   5  12   5   -0.21    0.18
   6  12   5   20.97    1.29
   7  12   5    0.23    0.24
   8  12   5    0.14    0.26
   0  13   5    1.82    0.45
   1  13   5    4.57    0.88
   2  13   5    1.54    0.39
   3  13   5    0.08    0.35
   4  13   5    2.71    0.69
   5  13   5    0.16    0.28
   6  13   5    0.75    0.30
   2   8  -6    0.54    0.26
  -2  -8   6    1.07    0.38
   1   8  -6    1.59    0.53
  -1  -8   6    2.34    0.68
   0  -8   6    0.59    0.35
  -1   8  -6    0.88    0.52
   1  -8   6    1.24    0.50
   5   7  -6    7.50    1.02
  -5  -7   6    7.18    1.15
   4   7  -6    9.15    1.00
  -4  -7   6    9.15    1.01
   3   7  -6    4.53    0.81
  -3  -7   6    4.40    0.91
   2   7  -6    5.59    0.88
  -2  -7   6    4.74    0.94
   1   7  -6    6.56    0.72
  -1  -7   6    7.37    1.05
   0   7  -6   20.48    1.37
   0  -7   6   21.44    1.45
  -1   7  -6    1.05    0.52
   1  -7   6    0.98    0.54
  -2   7  -6    2.54    0.53
   2  -7   6    1.12    0.61
  -3   7  -6    2.33    0.58
   3  -7   6    2.03    0.66
  -4   7  -6    7.29    0.99
   4  -7   6    6.58    1.06
   6   6  -6    7.08    0.83
  -6  -6   6    8.98    0.97
   5   6  -6   14.90    1.11
  -5  -6   6   15.05    1.28
   4   6  -6    9.35    0.88
  -4  -6   6    9.45    0.95
   3   6  -6    4.28    0.71
  -3  -6   6    4.68    0.80
   2   6  -6   31.72    1.59
  -2  -6   6   32.26    1.72
   1   6  -6    9.82    0.88
  -1  -6   6   11.29    1.00
   0   6  -6    3.92    0.70
   0  -6   6    4.64    0.81
  -1   6  -6    4.63    0.74
   1  -6   6    5.03    0.86
  -2   6  -6    4.31    0.67
   2  -6   6    3.81    0.76
  -3   6  -6   -0.27    0.21
   3  -6   6    0.84    0.35
  -4   6  -6    5.33    0.80
   4  -6   6    5.55    0.89
  -5   6  -6   10.02    0.91
   5  -6   6    9.53    0.97
   6  -6   6    7.75    0.92
   7   5  -6    0.44    0.38
  -7  -5   6   -0.01    0.29
   6   5  -6   14.41    1.04
  -6  -5   6   12.70    1.12
   5   5  -6    5.25    0.60
  -5  -5   6    2.98    0.68
   4   5  -6    0.89    0.44
  -4  -5   6    1.04    0.43
   3   5  -6   12.74    0.99
  -3  -5   6   13.08    1.07
   2   5  -6    3.42    0.62
  -2  -5   6    3.53    0.69
   1   5  -6   10.27    0.87
  -1  -5   6   10.08    0.91
   0   5  -6    0.25    0.18
   0  -5   6    0.56    0.26
  -1   5  -6    7.18    0.74
   1  -5   6    6.94    0.74
  -2   5  -6    1.36    0.45
   2  -5   6    1.13    0.35
  -3   5  -6    1.10    0.39
   3  -5   6    2.06    0.51
  -4   5  -6   17.17    1.08
   4  -5   6   16.31    1.18
  -5   5  -6    0.12    0.26
   5  -5   6    1.06    0.29
   6  -5   6    6.01    0.88
   7  -5   6   -0.17    0.18
   8  -5   6    0.48    0.32
  -8  -4   6    1.37    0.45
   7   4  -6    0.69    0.29
  -7  -4   6    0.73    0.50
   6   4  -6    5.79    0.66
  -6  -4   6    4.60    0.81
   5   4  -6    2.65    0.58
  -5  -4   6    3.22    0.63
   4   4  -6    0.48    0.26
  -4  -4   6    1.31    0.31
   3   4  -6   12.89    0.94
  -3  -4   6   13.23    1.00
   2   4  -6    8.89    0.79
  -2  -4   6   10.04    0.83
   1   4  -6    2.33    0.52
  -1  -4   6    3.00    0.54
   0   4  -6    5.88    0.59
   0  -4   6    5.37    0.63
  -1   4  -6    0.33    0.16
   1  -4   6    0.21    0.21
  -2   4  -6    0.32    0.13
   2  -4   6    0.04    0.20
  -3   4  -6    8.30    0.69
   3  -4   6    7.10    0.72
  -4   4  -6   13.52    0.87
   4  -4   6   12.07    0.94
  -5   4  -6   11.50    0.82
   5  -4   6   11.64    0.98
  -6   4  -6    9.50    0.74
   6  -4   6    9.59    0.95
  -7   4  -6    7.27    0.79
  -8   4  -6    0.36    0.41
  -9   4  -6    0.76    0.50
  -8  -3   6   -0.09    0.36
   7   3  -6   24.77    1.34
  -7  -3   6   25.99    1.49
   6   3  -6    0.11    0.28
  -6  -3   6    0.00    0.28
   5   3  -6    7.16    0.69
  -5  -3   6    6.52    0.71
   4   3  -6    2.75    0.50
  -4  -3   6    3.11    0.61
   3   3  -6   -0.01    0.11
  -3  -3   6    0.31    0.25
   2   3  -6   10.10    0.76
  -2  -3   6   10.85    0.82
   1   3  -6   -0.13    0.08
  -1  -3   6    0.01    0.19
   0   3  -6   14.57    0.92
   0  -3   6   15.66    0.98
  -1   3  -6    3.66    0.56
   1  -3   6    3.93    0.60
  -2   3  -6    4.09    0.58
   2  -3   6    3.85    0.59
  -3   3  -6    9.82    0.73
   3  -3   6   10.20    0.80
  -4   3  -6   46.19    1.58
   4  -3   6   43.69    1.77
  -5   3  -6    8.31    0.75
  -5   3  -6    7.65    0.62
  -6   3  -6    2.60    0.45
  -6   3  -6    2.28    0.55
  -7   3  -6    3.59    0.69
  -8   3  -6    1.12    0.52
  -9   3  -6    1.22    0.41
 -10   3  -6    4.79    0.88
  -9  -2   6    0.73    0.35
  -8  -2   6    0.22    0.32
   7   2  -6    5.67    0.57
  -7  -2   6    6.23    0.92
   6   2  -6    9.08    0.76
  -6  -2   6    9.24    0.84
   5   2  -6   10.83    0.80
  -5  -2   6    8.85    0.78
   4   2  -6    2.76    0.51
  -4  -2   6    3.51    0.56
   3   2  -6   17.31    0.98
  -3  -2   6   17.91    1.03
   2   2  -6    7.59    0.62
  -2  -2   6    6.94    0.64
   1   2  -6   74.38    2.15
  -1  -2   6   72.82    2.11
   0   2  -6   40.12    1.47
   0  -2   6   40.56    1.48
  -1   2  -6   17.94    0.94
   1  -2   6   17.42    0.95
   1  -2   6   19.04    0.56
  -2   2  -6    5.01    0.47
   2  -2   6    5.28    0.53
   2  -2   6    5.39    0.32
  -3   2  -6   74.59    2.03
   3  -2   6   73.65    1.62
   3  -2   6   72.23    2.17
  -4   2  -6    4.09    0.61
  -4   2  -6    4.15    0.46
   4  -2   6    3.94    0.36
  -5   2  -6    4.93    0.47
  -5   2  -6    4.61    0.54
   5  -2   6    4.91    0.45
  -6   2  -6    8.47    0.61
  -6   2  -6    7.96    0.73
   6  -2   6    7.54    0.62
  -7   2  -6    2.77    0.52
   7  -2   6    2.36    0.48
  -8   2  -6   10.39    0.89
   8  -2   6   10.08    0.82
  -9   2  -6   -0.26    0.28
   9  -2   6    0.55    0.30
 -10   2  -6    0.02    0.34
  10  -2   6    1.64    0.44
  -9  -1   6   -0.29    0.24
   8   1  -6   12.07    0.89
  -8  -1   6   11.33    0.98
   7   1  -6    1.63    0.37
   7   1  -6    0.61    0.28
  -7  -1   6    0.66    0.43
   6   1  -6    4.03    0.48
   6   1  -6    4.00    0.61
  -6  -1   6    2.99    0.55
   5   1  -6   32.44    1.28
   5   1  -6   32.94    1.41
  -5  -1   6   31.87    1.43
   4   1  -6   39.49    1.51
   4   1  -6   38.90    1.35
  -4  -1   6   37.44    1.48
   3   1  -6    0.61    0.26
   3   1  -6    1.10    0.22
  -3  -1   6    0.60    0.26
   2   1  -6   30.06    0.99
   2   1  -6   30.96    1.27
  -2  -1   6   30.55    1.23
   1   1  -6  191.93    3.85
   1   1  -6  185.97    3.29
  -1  -1   6  185.19    3.73
   0   1  -6    1.31    0.25
   0   1  -6    1.08    0.29
   0  -1   6    1.03    0.29
  -1   1  -6   13.42    0.56
  -1   1  -6   13.29    0.78
   1  -1   6   14.21    0.77
  -2   1  -6   58.98    1.73
  -2   1  -6   61.69    1.42
   2  -1   6   57.25    1.73
  -3   1  -6    4.44    0.46
   3  -1   6    4.70    0.47
   3  -1   6    4.69    0.35
  -4   1  -6    1.78    0.35
  -4   1  -6    1.65    0.32
   4  -1   6    1.01    0.22
  -5   1  -6    1.38    0.31
  -5   1  -6    1.43    0.31
   5  -1   6    1.74    0.32
  -6   1  -6   11.44    0.67
  -6   1  -6   13.01    0.86
   6  -1   6   12.36    0.74
  -7   1  -6    1.52    0.45
   7  -1   6    2.20    0.43
  -8   1  -6    2.61    0.59
   8  -1   6    4.09    0.68
  -9   1  -6   15.96    1.15
   9  -1   6   12.84    0.98
 -10   1  -6    2.71    0.57
  10  -1   6    1.98    0.55
 -11   1  -6    7.73    0.83
  11  -1   6    6.98    0.98
   9   0  -6    2.10    0.52
  -9   0   6    2.28    0.51
   8   0  -6    8.25    0.78
  -8   0   6    7.78    0.79
   7   0  -6   15.01    0.97
  -7   0   6   13.50    0.96
  -7   0   6   14.40    0.93
   6   0  -6   54.46    1.88
   6   0  -6   55.81    1.91
  -6   0   6   57.50    1.98
   5   0  -6    3.80    0.58
   5   0  -6    3.33    0.52
  -5   0   6    3.20    0.50
   4   0  -6   10.06    0.73
   4   0  -6   10.49    0.70
  -4   0   6    9.84    0.70
   3   0  -6   17.94    0.84
   3   0  -6   16.46    0.90
  -3   0   6   15.69    0.84
   2   0  -6    7.53    0.51
   2   0  -6    8.17    0.60
  -2   0   6    7.20    0.53
   1   0  -6   10.03    0.56
   1   0  -6   11.84    0.71
  -1   0   6   10.79    0.62
   0   0  -6   67.63    1.59
   0   0  -6   65.93    1.84
   0   0   6   67.68    1.73
  -1   0  -6   29.41    1.12
  -1   0  -6   28.82    0.94
   1   0   6   29.42    1.06
  -2   0  -6   -0.19    0.08
  -2   0  -6    0.07    0.11
   2   0   6    0.14    0.14
  -3   0  -6   14.50    0.74
  -3   0  -6   14.20    0.68
  -3   0  -6   15.13    0.76
  -4   0  -6    2.68    0.31
  -4   0  -6    2.54    0.40
   4   0   6    2.52    0.29
  -5   0  -6    2.79    0.32
  -5   0  -6    3.16    0.52
   5   0   6    3.01    0.35
  -6   0  -6    2.81    0.33
  -6   0  -6    2.49    0.50
   6   0   6    2.78    0.45
  -7   0  -6   41.11    1.63
   7   0   6   39.87    1.49
  -8   0  -6    1.65    0.39
   8   0   6    2.14    0.43
  -9   0  -6    0.47    0.33
   9   0   6   -0.16    0.16
 -10   0  -6   13.50    1.16
  10   0   6   13.58    1.03
 -11   0  -6    0.77    0.61
  11   0   6    0.13    0.32
   9  -1  -6    0.90    0.30
   8  -1  -6    6.49    0.68
  -8   1   6    6.35    0.72
   7  -1  -6    6.17    0.64
  -7   1   6    6.14    0.60
  -7   1   6    5.50    0.77
   6  -1  -6    8.65    0.74
  -6   1   6    6.51    0.62
  -6   1   6    7.24    0.64
   5  -1  -6   40.53    1.59
  -5   1   6   44.45    1.61
  -5   1   6   44.27    1.54
   4  -1  -6   55.02    1.78
   4  -1  -6   54.10    1.74
  -4   1   6   53.31    1.62
   3  -1  -6    4.46    0.47
   3  -1  -6    3.62    0.43
  -3   1   6    4.64    0.41
   2  -1  -6   34.25    1.21
   2  -1  -6   34.54    1.30
  -2   1   6   35.68    1.15
   1  -1  -6    0.02    0.07
   1  -1  -6   -0.01    0.10
  -1   1   6    0.33    0.11
   0  -1  -6   -0.19    0.07
   0   1   6    0.32    0.11
  -1  -1  -6   28.72    0.99
  -1  -1  -6   28.86    1.09
   1   1   6   28.45    0.94
  -2  -1  -6  100.02    2.29
  -2  -1  -6  102.46    2.21
   2   1   6  100.82    2.16
  -3  -1  -6    3.72    0.35
  -3  -1  -6    3.90    0.37
  -3  -1  -6    3.49    0.33
  -4  -1  -6   -0.14    0.10
  -4  -1  -6    0.72    0.18
  -5  -1  -6   14.37    0.68
  -5  -1  -6   12.90    0.74
   5   1   6   14.25    0.76
  -6  -1  -6   21.24    0.82
  -6  -1  -6   21.40    1.03
   6   1   6   22.72    1.03
  -7  -1  -6    5.54    0.55
   7   1   6    4.92    0.51
  -8  -1  -6   13.71    0.95
   8   1   6   13.30    0.88
  -9  -1  -6   10.64    0.91
   9   1   6   10.33    0.85
 -10  -1  -6    0.08    0.28
  10   1   6    0.64    0.38
 -11  -1  -6    1.37    0.45
  11   1   6    1.89    0.54
 -12  -1  -6    1.02    0.46
  12   1   6    0.95    0.44
   9  -2  -6   24.42    1.51
   8  -2  -6    0.21    0.26
   7  -2  -6    2.18    0.43
  -7   2   6    0.82    0.38
   6  -2  -6   -0.17    0.18
  -6   2   6    0.26    0.18
  -6   2   6   -0.18    0.19
   5  -2  -6    0.66    0.25
  -5   2   6    0.60    0.22
  -5   2   6    0.50    0.31
   4  -2  -6    1.12    0.31
  -4   2   6    1.65    0.32
  -4   2   6    1.12    0.30
   3  -2  -6    2.76    0.48
  -3   2   6    3.20    0.32
  -3   2   6    3.36    0.51
   2  -2  -6   29.26    1.16
   2  -2  -6   28.36    1.13
  -2   2   6   29.02    0.92
   1  -2  -6   22.32    0.99
   1  -2  -6   24.12    0.97
  -1   2   6   23.73    0.77
   0  -2  -6    7.07    0.52
   0  -2  -6    8.05    0.57
   0   2   6    7.57    0.39
  -1  -2  -6   26.82    1.00
  -1  -2  -6   26.46    1.03
   1   2   6   26.51    0.79
  -2  -2  -6   58.63    1.60
  -2  -2  -6   58.35    1.59
   2   2   6   60.17    1.39
  -3  -2  -6    0.25    0.15
  -3  -2  -6    0.09    0.14
  -3  -2  -6    0.21    0.09
  -4  -2  -6    4.20    0.40
  -4  -2  -6    4.10    0.37
  -4  -2  -6    3.66    0.37
  -5  -2  -6   13.95    0.67
  -5  -2  -6   13.99    0.74
  -5  -2  -6   13.75    0.78
  -6  -2  -6    5.12    0.50
   6   2   6    4.83    0.49
   6   2   6    4.97    0.36
  -7  -2  -6   30.03    1.27
   7   2   6   28.51    1.26
   7   2   6   29.90    0.88
  -8  -2  -6    0.43    0.25
   8   2   6    1.04    0.31
  -9  -2  -6    7.19    0.71
   9   2   6    7.14    0.70
 -10  -2  -6    7.06    0.98
  10   2   6    5.02    0.81
 -11  -2  -6    4.57    0.89
  11   2   6    5.62    0.93
 -12  -2  -6    4.09    0.70
  12   2   6    2.80    0.73
   9  -3  -6    0.94    0.26
   8  -3  -6    0.22    0.35
   7  -3  -6    3.81    0.63
   6  -3  -6    6.18    0.72
  -6   3   6    6.95    0.55
  -6   3   6    5.74    0.60
   5  -3  -6    4.47    0.65
  -5   3   6    4.10    0.56
  -5   3   6    3.68    0.42
   4  -3  -6    1.92    0.40
  -4   3   6    1.27    0.28
  -4   3   6    1.77    0.43
   3  -3  -6    0.78    0.31
  -3   3   6    0.79    0.24
  -3   3   6    0.96    0.21
   2  -3  -6   39.83    1.42
  -2   3   6   41.08    1.46
  -2   3   6   41.25    1.03
   1  -3  -6    0.27    0.11
  -1   3   6    0.04    0.11
  -1   3   6    0.13    0.08
   0  -3  -6   21.33    0.92
   0   3   6   21.89    0.96
   0   3   6   21.79    0.58
  -1  -3  -6   39.40    1.30
   1   3   6   40.96    1.34
   1   3   6   40.30    0.89
  -2  -3  -6   60.07    1.23
  -2  -3  -6   59.75    1.67
   2   3   6   59.66    1.62
  -3  -3  -6   33.81    1.20
  -3  -3  -6   32.98    0.93
   3   3   6   32.62    1.10
  -4  -3  -6   35.98    1.08
  -4  -3  -6   37.29    1.31
   4   3   6   37.78    1.18
  -5  -3  -6    8.26    0.54
  -5  -3  -6    8.59    0.65
   5   3   6    8.61    0.49
  -6  -3  -6   15.89    0.82
  -6  -3  -6   13.52    0.84
   6   3   6   15.49    0.65
  -7  -3  -6   17.81    0.94
   7   3   6   17.62    0.99
   7   3   6   16.51    0.63
  -8  -3  -6    8.36    0.69
   8   3   6    8.33    0.70
  -9  -3  -6    4.50    0.69
   9   3   6    5.18    0.60
 -10  -3  -6    0.39    0.30
  10   3   6    0.28    0.26
 -11  -3  -6    3.04    0.65
  11   3   6    4.75    0.85
 -12  -3  -6    7.66    0.87
  12   3   6    8.73    0.96
   9  -4  -6    3.16    0.65
   8  -4  -6    1.65    0.59
   7  -4  -6    1.69    0.46
   6  -4  -6    3.14    0.65
  -6   4   6    2.62    0.46
   5  -4  -6    4.41    0.71
  -5   4   6    3.33    0.56
   4  -4  -6    8.88    0.75
  -4   4   6   10.42    0.73
  -4   4   6    9.72    0.52
   3  -4  -6   79.69    2.34
  -3   4   6   78.95    2.22
  -3   4   6   80.21    1.64
   2  -4  -6   69.55    2.05
  -2   4   6   69.86    2.01
  -2   4   6   69.56    1.32
   1  -4  -6   14.94    0.83
  -1   4   6   14.58    0.34
  -1   4   6   14.08    0.82
   0  -4  -6   26.89    1.10
   0   4   6   23.86    1.05
  -1  -4  -6   89.22    2.24
   1   4   6   89.34    2.20
  -2  -4  -6   52.05    1.60
  -2  -4  -6   52.11    0.99
   2   4   6   52.13    1.55
  -3  -4  -6   25.43    1.08
  -3  -4  -6   26.30    0.74
   3   4   6   26.42    1.01
  -4  -4  -6    0.25    0.11
  -4  -4  -6    0.04    0.08
   4   4   6    0.24    0.10
  -5  -4  -6    9.26    0.66
  -5  -4  -6    9.33    0.53
   5   4   6    9.88    0.55
  -6  -4  -6    2.46    0.47
  -6  -4  -6    1.97    0.33
   6   4   6    2.94    0.28
  -7  -4  -6    2.50    0.42
   7   4   6    2.57    0.47
   7   4   6    2.53    0.26
  -8  -4  -6    7.76    0.64
   8   4   6    9.30    0.73
  -9  -4  -6   12.71    0.91
   9   4   6   12.12    0.91
 -10  -4  -6    4.51    0.76
  10   4   6    3.82    0.67
 -11  -4  -6    0.43    0.30
  11   4   6    0.35    0.35
 -12  -4  -6    1.95    0.44
  12   4   6    0.58    0.42
   8  -5  -6   -0.49    0.34
   7  -5  -6    0.12    0.18
   6  -5  -6    5.29    0.82
  -6   5   6    5.33    0.58
   5  -5  -6    2.33    0.56
  -5   5   6    2.86    0.50
   4  -5  -6   -0.06    0.16
  -4   5   6    0.26    0.20
   3  -5  -6   93.18    2.64
  -3   5   6   96.00    2.55
   2  -5  -6    7.94    0.66
  -2   5   6    7.09    0.60
   1  -5  -6    4.36    0.49
  -1   5   6    4.46    0.48
   0  -5  -6   25.81    1.13
   0   5   6   28.38    1.15
  -1  -5  -6   30.88    1.21
   1   5   6   30.39    1.18
  -2  -5  -6   -0.01    0.04
  -2  -5  -6   -0.26    0.08
   2   5   6    0.11    0.04
   2   5   6   -0.18    0.07
  -3  -5  -6   96.32    1.72
  -3  -5  -6   97.30    2.41
   3   5   6   92.36    2.25
  -4  -5  -6  119.99    2.84
  -4  -5  -6  118.19    2.25
   4   5   6  119.77    2.57
  -5  -5  -6   51.25    1.38
  -5  -5  -6   51.12    1.71
   5   5   6   51.12    1.44
  -6  -5  -6   25.45    0.99
  -6  -5  -6   25.86    1.24
   6   5   6   25.85    0.93
  -7  -5  -6    0.75    0.25
  -7  -5  -6    1.11    0.33
   7   5   6    0.91    0.20
  -8  -5  -6    0.42    0.23
   8   5   6    0.57    0.20
  -9  -5  -6    3.35    0.59
   9   5   6    3.68    0.65
 -10  -5  -6    7.28    0.72
  10   5   6    6.78    0.76
 -11  -5  -6   20.09    1.28
  11   5   6   21.37    1.33
 -12  -5  -6    0.42    0.37
  12   5   6    0.10    0.26
 -13  -5  -6    3.95    0.68
   8  -6  -6    1.90    0.65
   7  -6  -6    8.50    0.95
   6  -6  -6    0.13    0.29
  -6   6   6    0.99    0.34
   5  -6  -6    8.99    0.87
  -5   6   6    9.93    0.80
   4  -6  -6   47.58    1.92
  -4   6   6   46.20    1.72
   3  -6  -6    4.32    0.68
  -3   6   6    4.40    0.63
   2  -6  -6    9.91    0.80
  -2   6   6    9.67    0.73
   1  -6  -6  137.59    3.26
  -1   6   6  138.99    3.20
   0  -6  -6   55.38    1.79
   0   6   6   55.10    1.76
  -1  -6  -6    0.69    0.24
   1   6   6    0.85    0.21
  -2  -6  -6   30.90    1.26
   2   6   6   31.22    1.22
  -3  -6  -6   24.98    0.66
  -3  -6  -6   25.61    1.15
   3   6   6   25.35    1.06
  -4  -6  -6   -0.01    0.08
   4   6   6   -0.03    0.09
  -5  -6  -6   93.30    2.04
  -5  -6  -6   92.77    2.48
   5   6   6   94.61    2.21
  -6  -6  -6   18.32    1.03
  -6  -6  -6   17.57    0.83
   6   6   6   18.06    0.81
  -7  -6  -6    3.11    0.55
  -7  -6  -6    3.60    0.41
   7   6   6    3.39    0.33
  -8  -6  -6    5.07    0.51
   8   6   6    4.75    0.55
  -9  -6  -6    9.81    0.78
   9   6   6    9.35    0.80
 -10  -6  -6    2.43    0.52
  10   6   6    2.28    0.59
 -11  -6  -6    1.57    0.35
  11   6   6    0.75    0.36
 -12  -6  -6    0.47    0.42
  12   6   6   -0.43    0.23
   7  -7  -6    3.57    0.84
   6  -7  -6    8.71    0.98
  -6   7   6    9.30    0.83
   5  -7  -6    8.85    0.87
  -5   7   6    8.19    0.78
   4  -7  -6    2.80    0.59
  -4   7   6    2.15    0.54
   3  -7  -6    1.59    0.37
  -3   7   6    1.86    0.36
   2  -7  -6    7.89    0.73
  -2   7   6    7.58    0.69
   1  -7  -6   16.62    1.02
  -1   7   6   17.24    1.00
   0  -7  -6   11.76    0.81
   0   7   6   12.77    0.83
  -1  -7  -6   37.54    1.48
   1   7   6   37.35    1.45
  -2  -7  -6    0.79    0.26
   2   7   6    0.71    0.28
  -3  -7  -6   39.44    0.94
  -3  -7  -6   39.46    1.51
   3   7   6   39.60    1.42
  -4  -7  -6   25.49    0.83
  -4  -7  -6   25.38    1.20
   4   7   6   25.37    1.11
  -5  -7  -6   13.26    0.84
  -5  -7  -6   12.91    0.66
   5   7   6   13.16    0.75
  -6  -7  -6    3.07    0.53
  -6  -7  -6    1.75    0.38
   6   7   6    1.60    0.33
  -7  -7  -6    5.40    0.50
  -7  -7  -6    5.50    0.62
   7   7   6    5.14    0.43
  -8  -7  -6    7.15    0.65
   8   7   6    7.23    0.73
  -9  -7  -6    0.87    0.31
 -10  -7  -6    9.79    0.81
  10   7   6   10.10    0.95
 -11  -7  -6    1.10    0.30
  11   7   6   -0.06    0.15
 -12  -7  -6    2.35    0.61
  12   7   6    1.62    0.59
   7  -8  -6    0.77    0.27
   6  -8  -6    0.99    0.34
   5  -8  -6   -0.28    0.14
  -5   8   6    0.28    0.27
   4  -8  -6    1.75    0.38
  -4   8   6    0.68    0.31
   3  -8  -6    2.36    0.48
  -3   8   6    1.05    0.39
   2  -8  -6    9.84    0.81
  -2   8   6    8.63    0.80
   1  -8  -6    2.73    0.58
  -1   8   6    2.86    0.51
   0  -8  -6   11.13    0.84
   0   8   6   10.73    0.82
  -1  -8  -6    8.39    0.72
   1   8   6    9.67    0.78
  -2  -8  -6   17.44    1.00
   2   8   6   17.67    0.99
  -3  -8  -6    0.26    0.22
   3   8   6    0.31    0.12
  -4  -8  -6   21.67    1.14
  -4  -8  -6   22.37    0.84
   4   8   6   23.49    1.09
  -5  -8  -6   11.50    0.65
  -5  -8  -6   11.41    0.80
   5   8   6   11.14    0.73
  -6  -8  -6    1.94    0.38
  -6  -8  -6    1.41    0.36
   6   8   6    1.24    0.30
  -7  -8  -6    0.34    0.19
  -7  -8  -6    0.05    0.26
   7   8   6    0.19    0.16
  -8  -8  -6    1.89    0.42
   8   8   6    2.16    0.53
   8   8   6    2.80    0.43
  -9  -8  -6    2.44    0.49
   9   8   6    2.19    0.55
 -10  -8  -6    0.22    0.32
  10   8   6   -0.18    0.28
 -11  -8  -6   11.91    1.00
  11   8   6   11.28    1.01
 -12  -8  -6    2.98    0.69
  12   8   6    3.93    0.69
   6  -9  -6    0.35    0.31
   5  -9  -6    1.79    0.46
  -5   9   6    1.31    0.50
   4  -9  -6    3.45    0.71
  -4   9   6    2.81    0.55
   3  -9  -6    0.53    0.25
  -3   9   6   -0.20    0.20
   2  -9  -6    2.56    0.58
  -2   9   6    2.44    0.49
   1  -9  -6   12.20    0.91
  -1   9   6   11.48    0.88
   0  -9  -6   25.29    1.31
   0   9   6   24.68    1.28
  -1  -9  -6    0.76    0.19
   1   9   6    0.29    0.19
  -2  -9  -6    0.49    0.27
   2   9   6    0.61    0.28
  -3  -9  -6    0.14    0.26
   3   9   6    0.41    0.26
  -4  -9  -6   -0.11    0.15
   4   9   6    0.02    0.13
  -5  -9  -6    0.77    0.24
  -5  -9  -6    0.64    0.21
   5   9   6    1.65    0.31
  -6  -9  -6   27.66    1.17
  -6  -9  -6   26.45    1.33
   6   9   6   26.30    1.23
  -7  -9  -6    2.41    0.51
  -7  -9  -6    3.02    0.52
   7   9   6    2.81    0.48
  -8  -9  -6    2.38    0.49
   8   9   6    1.94    0.38
  -9  -9  -6   10.09    0.84
   9   9   6   11.04    0.96
 -10  -9  -6    3.27    0.70
  10   9   6    3.63    0.64
 -11  -9  -6    8.57    0.94
  11   9   6    9.19    0.89
   5 -10  -6    3.47    0.70
  -5  10   6    2.46    0.57
   4 -10  -6    2.06    0.46
  -4  10   6    1.52    0.48
   3 -10  -6    0.89    0.32
  -3  10   6    0.94    0.28
   2 -10  -6    0.42    0.24
  -2  10   6    0.37    0.38
   1 -10  -6    2.14    0.49
  -1  10   6    2.13    0.47
   0 -10  -6   10.22    0.85
   0  10   6   10.75    0.87
  -1 -10  -6    9.42    0.81
   1  10   6    9.63    0.82
  -2 -10  -6    2.61    0.57
   2  10   6    2.03    0.48
  -3 -10  -6   11.38    0.86
   3  10   6   11.47    0.86
  -4 -10  -6   25.91    1.34
   4  10   6   28.39    1.37
  -5 -10  -6    5.06    0.74
   5  10   6    4.14    0.64
  -6 -10  -6    1.30    0.35
   6  10   6    1.90    0.38
  -7 -10  -6   31.04    1.52
  -7 -10  -6   31.16    1.39
   7  10   6   30.86    1.36
  -8 -10  -6   23.18    1.25
   8  10   6   24.32    1.18
  -9 -10  -6    4.46    0.70
   9  10   6    4.37    0.78
 -10 -10  -6   14.29    1.07
  10  10   6   15.87    1.14
 -11 -10  -6    2.37    0.65
  11  10   6    1.73    0.41
   3 -11  -6    2.46    0.55
  -3  11   6    1.31    0.41
   2 -11  -6    9.35    0.84
  -2  11   6    7.61    0.88
   1 -11  -6    9.69    0.87
  -1  11   6    8.67    0.85
   0 -11  -6    8.04    0.73
   0  11   6    8.08    0.81
  -1 -11  -6    1.80    0.47
   1  11   6    1.29    0.47
  -2 -11  -6   20.77    1.24
   2  11   6   20.14    1.26
  -3 -11  -6   41.65    1.79
   3  11   6   41.84    1.80
  -4 -11  -6    8.88    0.81
   4  11   6   10.39    0.83
  -5 -11  -6    7.26    0.72
   5  11   6    8.27    0.80
  -6 -11  -6   17.99    1.10
   6  11   6   17.13    1.09
  -7 -11  -6    0.08    0.26
   7  11   6    0.66    0.28
   8  11   6    2.53    0.52
   8  11   6    2.81    0.59
  -9 -11  -6    5.72    0.85
   9  11   6    5.72    0.89
 -10 -11  -6    1.04    0.43
  10  11   6   -0.02    0.31
   2 -12  -6   14.28    1.15
  -2  12   6   17.29    1.26
   1 -12  -6    1.29    0.45
  -1  12   6    1.45    0.49
   0 -12  -6    4.02    0.72
   0  12   6    4.46    0.72
  -1 -12  -6   10.61    0.95
   1  12   6   11.48    0.94
  -2 -12  -6    0.74    0.31
   2  12   6    0.59    0.40
  -3 -12  -6    0.14    0.30
   3  12   6    0.07    0.35
  -4 -12  -6    2.38    0.50
   4  12   6    2.34    0.57
  -5 -12  -6   13.71    0.99
   5  12   6   13.47    1.09
  -6 -12  -6    9.82    1.00
   6  12   6    8.71    0.86
   7  12   6    6.11    0.69
   8  12   6    5.25    0.81
   0  13   6    0.47    0.31
   1  13   6    0.22    0.45
   2  13   6    3.08    0.65
   3  13   6    5.74    0.97
   4  13   6    1.38    0.49
   5  13   6    3.69    0.72
   6  13   6    1.66    0.45
   7  13   6    0.35    0.36
   2   7  -7   12.05    1.16
  -2  -7   7   12.84    1.15
   1   7  -7    4.25    0.84
  -1  -7   7    3.37    0.70
   0   7  -7    4.43    0.90
   0  -7   7    2.91    0.66
  -1   7  -7    6.79    0.80
   1  -7   7    7.42    0.89
  -2   7  -7    0.44    0.44
   2  -7   7    0.03    0.29
   4   6  -7    0.05    0.32
  -4  -6   7    1.21    0.48
   3   6  -7    6.00    0.88
  -3  -6   7    4.92    0.92
   2   6  -7   22.13    1.41
  -2  -6   7   21.62    1.50
   1   6  -7    8.46    0.88
  -1  -6   7    7.00    1.04
   0   6  -7    8.01    0.86
   0  -6   7    9.65    1.03
  -1   6  -7    5.27    0.84
   1  -6   7    6.01    1.01
  -2   6  -7    6.00    0.93
   2  -6   7    6.16    1.00
  -3   6  -7    5.75    0.81
   3  -6   7    6.41    1.02
  -4   6  -7   -0.06    0.29
   4  -6   7    1.67    0.43
  -5   6  -7    0.39    0.44
   5  -6   7    0.29    0.38
   6   5  -7   12.94    1.08
  -6  -5   7   11.97    1.14
   5   5  -7    9.16    0.89
  -5  -5   7    8.88    0.96
   4   5  -7    1.45    0.42
  -4  -5   7    2.45    0.49
   3   5  -7   68.51    2.53
  -3  -5   7   68.89    2.62
   2   5  -7   31.03    1.60
  -2  -5   7   27.68    1.63
   1   5  -7    1.37    0.50
  -1  -5   7    2.13    0.53
   0   5  -7    2.49    0.60
   0  -5   7    3.86    0.71
  -1   5  -7    4.38    0.76
   1  -5   7    4.88    0.80
  -2   5  -7    0.19    0.26
   2  -5   7    0.51    0.20
  -3   5  -7    2.38    0.54
   3  -5   7    2.81    0.61
  -4   5  -7   12.70    0.99
   4  -5   7   11.46    1.05
  -5   5  -7   24.19    1.34
   5  -5   7   25.66    1.55
   6  -5   7    0.76    0.50
   7  -5   7    4.55    0.81
   7   4  -7   17.78    1.32
  -7  -4   7   17.27    1.34
   6   4  -7    6.34    0.76
  -6  -4   7    7.00    1.00
   5   4  -7    0.29    0.27
  -5  -4   7    0.21    0.29
   4   4  -7   14.18    1.04
  -4  -4   7   14.62    1.13
   3   4  -7    0.17    0.18
  -3  -4   7    0.09    0.17
   2   4  -7    0.72    0.40
  -2  -4   7    0.55    0.35
   1   4  -7   23.89    1.35
  -1  -4   7   24.19    1.36
   0   4  -7    4.10    0.66
   0  -4   7    3.09    0.60
  -1   4  -7    3.53    0.59
   1  -4   7    2.86    0.59
  -2   4  -7    3.75    0.63
   2  -4   7    4.88    0.80
  -3   4  -7    8.87    0.81
   3  -4   7    7.51    0.79
  -4   4  -7    5.51    0.58
   4  -4   7    4.95    0.77
  -5   4  -7   16.31    1.04
   5  -4   7   18.17    1.23
  -6   4  -7    3.72    0.67
   6  -4   7    3.15    0.64
   7  -4   7    1.56    0.49
  -8   4  -7    2.37    0.56
   7   3  -7    3.02    0.63
  -7  -3   7    3.75    0.65
   6   3  -7    5.96    0.85
  -6  -3   7    5.75    0.88
   5   3  -7    4.95    0.75
  -5  -3   7    5.40    0.64
   4   3  -7    1.86    0.43
  -4  -3   7    0.63    0.35
   3   3  -7    8.61    0.77
  -3  -3   7    8.75    0.80
   2   3  -7    0.69    0.19
  -2  -3   7   -0.16    0.23
   1   3  -7    0.45    0.20
  -1  -3   7    0.42    0.32
   0   3  -7    8.24    0.75
   0  -3   7    9.09    0.79
  -1   3  -7   12.82    0.91
   1  -3   7   12.73    0.93
  -2   3  -7    1.09    0.40
   2  -3   7    1.48    0.35
  -3   3  -7    0.83    0.32
   3  -3   7    1.76    0.39
  -4   3  -7   15.31    0.96
   4  -3   7   16.29    1.07
  -5   3  -7    4.11    0.49
   5  -3   7    3.35    0.66
  -6   3  -7    0.31    0.32
   6  -3   7    0.01    0.27
  -7   3  -7    7.95    0.82
  -8   3  -7    0.46    0.46
  -9   3  -7    0.22    0.42
  -8  -2   7    0.58    0.47
   7   2  -7    1.00    0.43
  -7  -2   7    1.70    0.61
   6   2  -7    0.56    0.24
  -6  -2   7    0.61    0.29
   5   2  -7    3.97    0.65
  -5  -2   7    4.12    0.74
   4   2  -7   15.79    1.05
  -4  -2   7   15.73    1.04
   3   2  -7    2.49    0.50
  -3  -2   7    3.18    0.56
   2   2  -7   17.72    1.04
  -2  -2   7   15.60    0.97
   1   2  -7    4.70    0.56
  -1  -2   7    4.73    0.53
   0   2  -7   25.87    1.25
   0  -2   7   25.47    1.23
  -1   2  -7   18.56    1.03
   1  -2   7   18.60    1.04
  -2   2  -7    1.56    0.36
   2  -2   7    1.79    0.40
  -3   2  -7    0.12    0.17
   3  -2   7    0.17    0.23
  -4   2  -7    8.85    0.71
   4  -2   7    9.93    0.82
  -5   2  -7    3.08    0.51
  -5   2  -7    3.37    0.64
  -6   2  -7    1.60    0.45
  -6   2  -7    1.60    0.39
  -7   2  -7    1.97    0.46
   7  -2   7    1.33    0.42
  -8   2  -7    3.60    0.65
   8  -2   7    4.04    0.74
  -9   2  -7    6.54    0.96
 -10   2  -7    1.93    0.68
  -8  -1   7    0.32    0.39
   7   1  -7    7.94    0.78
  -7  -1   7    7.48    0.83
   6   1  -7    7.54    0.75
  -6  -1   7    7.90    0.77
   5   1  -7    8.66    0.79
  -5  -1   7    9.90    0.81
   4   1  -7   13.69    0.96
  -4  -1   7   15.20    0.96
   3   1  -7    0.64    0.25
  -3  -1   7    0.30    0.19
   2   1  -7    2.43    0.40
   2   1  -7    2.15    0.49
  -2  -1   7    1.65    0.38
   1   1  -7   12.82    0.85
   1   1  -7   12.28    0.62
  -1  -1   7   12.32    0.79
   0   1  -7   18.02    0.71
   0   1  -7   17.39    0.98
   0  -1   7   17.17    0.92
  -1   1  -7   11.24    0.78
  -1   1  -7   11.66    0.56
   1  -1   7   11.80    0.77
  -2   1  -7   29.14    1.26
  -2   1  -7   28.21    0.93
   2  -1   7   28.52    1.22
  -3   1  -7   21.37    1.05
   3  -1   7   22.26    0.83
   3  -1   7   22.16    1.08
  -4   1  -7    0.11    0.09
   4  -1   7    0.15    0.13
   4  -1   7    0.37    0.15
  -5   1  -7   15.14    0.94
  -5   1  -7   16.58    0.88
   5  -1   7   16.40    0.82
  -6   1  -7   26.60    1.31
  -6   1  -7   26.20    1.10
   6  -1   7   25.78    1.10
  -7   1  -7    2.98    0.60
   7  -1   7    3.07    0.48
  -8   1  -7    2.17    0.57
   8  -1   7    2.03    0.46
  -9   1  -7    0.11    0.38
   9  -1   7    0.32    0.23
 -10   1  -7    4.76    0.82
  10  -1   7    5.09    0.82
   8   0  -7   12.67    0.96
  -8   0   7   11.79    1.00
   7   0  -7    1.83    0.45
  -7   0   7    0.90    0.41
  -7   0   7    1.37    0.42
   6   0  -7    4.95    0.71
   6   0  -7    4.42    0.69
  -6   0   7    5.13    0.76
   5   0  -7   31.67    1.38
   5   0  -7   32.79    1.46
  -5   0   7   31.10    1.38
   4   0  -7    0.58    0.21
   4   0  -7    0.65    0.19
  -4   0   7    0.53    0.21
   3   0  -7   24.08    1.19
   3   0  -7   24.20    1.06
  -3   0   7   24.21    1.12
   2   0  -7   40.65    1.57
   2   0  -7   39.90    1.31
  -2   0   7   40.65    1.43
   1   0  -7   30.21    1.07
   1   0  -7   31.75    1.32
  -1   0   7   30.37    1.18
   0   0  -7   95.93    2.51
   0   0  -7   97.77    2.15
   0   0   7   92.54    2.30
  -1   0  -7   86.25    2.32
  -1   0  -7   92.12    2.03
   1   0   7   89.00    2.22
  -2   0  -7   43.63    1.50
  -2   0  -7   43.76    1.28
   2   0   7   43.83    1.44
  -3   0  -7    1.37    0.32
  -3   0  -7    1.01    0.27
   3   0   7    1.12    0.32
  -4   0  -7    9.11    0.65
  -4   0  -7    9.44    0.65
   4   0   7    8.84    0.57
  -5   0  -7    3.93    0.58
  -5   0  -7    4.31    0.43
   5   0   7    4.01    0.41
  -6   0  -7    4.07    0.42
  -6   0  -7    4.35    0.66
   6   0   7    3.66    0.54
  -7   0  -7   31.61    1.46
   7   0   7   31.99    1.35
  -8   0  -7   29.04    1.45
   8   0   7   28.84    1.35
  -9   0  -7    6.25    0.89
   9   0   7    5.80    0.64
 -10   0  -7    7.51    0.83
  10   0   7    7.94    0.85
 -11   0  -7    0.31    0.41
  11   0   7    0.96    0.45
   8  -1  -7    3.44    0.71
   7  -1  -7    8.96    0.80
  -7   1   7    8.80    0.79
  -7   1   7    8.15    1.50
   6  -1  -7    7.07    0.69
  -6   1   7    7.23    0.68
  -6   1   7    6.55    0.66
   5  -1  -7   10.85    0.85
  -5   1   7   10.51    0.80
  -5   1   7   11.47    0.79
   4  -1  -7   20.72    1.13
   4  -1  -7   20.72    1.06
  -4   1   7   20.48    1.00
   3  -1  -7   30.00    1.33
   3  -1  -7   27.58    1.19
  -3   1   7   28.51    1.14
   2  -1  -7    3.84    0.42
   2  -1  -7    4.27    0.47
  -2   1   7    3.99    0.42
   1  -1  -7    5.37    0.45
   1  -1  -7    5.48    0.54
  -1   1   7    5.77    0.46
   0  -1  -7   75.31    1.92
   0  -1  -7   78.98    2.19
   0   1   7   80.22    1.90
  -1  -1  -7    0.01    0.14
  -1  -1  -7    0.38    0.24
   1   1   7    0.53    0.17
  -2  -1  -7   73.15    1.86
  -2  -1  -7   73.51    2.02
   2   1   7   73.99    1.84
  -3  -1  -7   73.30    1.97
  -3  -1  -7   70.93    1.84
  -4  -1  -7    0.09    0.19
  -4  -1  -7   -0.31    0.10
  -5  -1  -7    2.89    0.44
  -5  -1  -7    2.15    0.37
   5   1   7    1.98    0.37
  -6  -1  -7    4.17    0.48
  -6  -1  -7    4.97    0.44
   6   1   7    4.59    0.44
  -7  -1  -7    3.17    0.54
   7   1   7    3.19    0.52
  -8  -1  -7    3.35    0.62
   8   1   7    3.69    0.60
  -9  -1  -7   17.90    1.17
   9   1   7   18.26    1.14
 -10  -1  -7    2.00    0.61
  10   1   7    3.13    0.65
 -11  -1  -7    0.13    0.39
  11   1   7    0.42    0.44
 -12  -1  -7    2.08    0.76
   8  -2  -7    1.09    0.35
   7  -2  -7    1.57    0.34
   6  -2  -7    6.74    0.70
  -6   2   7    7.03    0.67
   5  -2  -7   10.59    0.85
  -5   2   7   10.27    0.84
  -5   2   7   14.17    0.80
   4  -2  -7    0.18    0.23
  -4   2   7    0.10    0.16
  -4   2   7    0.94    0.21
   3  -2  -7    8.10    0.64
  -3   2   7    8.68    0.55
  -3   2   7    8.12    0.70
   2  -2  -7   50.28    1.63
   2  -2  -7   49.47    1.70
  -2   2   7   46.52    1.34
   1  -2  -7   18.91    0.99
   1  -2  -7   17.91    0.89
  -1   2   7   18.09    0.73
   0  -2  -7    7.27    0.60
   0  -2  -7    6.42    0.51
   0   2   7    6.93    0.43
  -1  -2  -7   48.20    1.58
  -1  -2  -7   49.23    1.51
   1   2   7   50.37    1.30
  -2  -2  -7    9.74    0.66
  -2  -2  -7    9.59    0.62
   2   2   7    9.96    0.53
  -3  -2  -7   10.65    0.68
  -3  -2  -7   11.45    0.59
  -3  -2  -7   10.85    0.69
  -4  -2  -7   43.78    1.46
  -4  -2  -7   43.22    1.33
  -4  -2  -7   43.36    1.39
  -5  -2  -7   38.08    1.40
  -5  -2  -7   37.30    1.31
  -5  -2  -7   40.57    1.30
  -6  -2  -7   23.84    1.09
   6   2   7   24.16    0.94
  -7  -2  -7    9.30    0.73
   7   2   7    9.86    0.74
   7   2   7   10.46    0.57
  -8  -2  -7   13.29    0.90
   8   2   7   13.57    0.94
  -9  -2  -7    3.86    0.65
   9   2   7    3.88    0.68
 -10  -2  -7    3.03    0.68
  10   2   7    2.64    0.65
 -11  -2  -7    4.59    0.83
  11   2   7    5.58    0.90
 -12  -2  -7    4.11    0.75
  12   2   7    4.04    0.90
   8  -3  -7    4.03    0.83
   7  -3  -7    2.53    0.50
   6  -3  -7    1.50    0.44
  -6   3   7    0.71    0.31
   5  -3  -7    2.52    0.57
  -5   3   7    3.18    0.51
   4  -3  -7    5.31    0.60
  -4   3   7    4.56    0.54
  -4   3   7    5.33    0.44
   3  -3  -7   28.80    1.29
  -3   3   7   29.20    1.33
  -3   3   7   30.02    0.99
   2  -3  -7    9.60    0.70
  -2   3   7   10.00    0.73
  -2   3   7   10.10    0.50
   1  -3  -7  120.87    2.86
  -1   3   7  119.61    2.89
  -1   3   7  121.76    2.21
   0  -3  -7    1.39    0.34
   0   3   7    1.45    0.17
   0   3   7    1.50    0.31
  -1  -3  -7   21.04    0.95
   1   3   7   19.58    0.96
   1   3   7   20.68    0.66
  -2  -3  -7   20.85    0.97
   2   3   7   22.00    0.72
   2   3   7   21.11    0.97
  -3  -3  -7   25.28    0.83
  -3  -3  -7   24.69    1.08
   3   3   7   25.28    1.04
  -4  -3  -7   32.42    1.05
  -4  -3  -7   32.85    1.27
   4   3   7   31.54    1.15
  -5  -3  -7    2.08    0.39
  -5  -3  -7    2.65    0.41
   5   3   7    2.53    0.38
  -6  -3  -7    2.23    0.40
  -6  -3  -7    1.90    0.36
   6   3   7    2.15    0.34
  -7  -3  -7   -0.07    0.18
   7   3   7   -0.13    0.15
   7   3   7    0.09    0.15
  -8  -3  -7    1.25    0.36
   8   3   7    1.50    0.43
  -9  -3  -7    5.42    0.79
   9   3   7    5.70    0.66
 -10  -3  -7    0.46    0.33
  10   3   7    1.55    0.47
 -11  -3  -7    0.04    0.26
  11   3   7    0.35    0.26
 -12  -3  -7    0.52    0.35
  12   3   7    0.83    0.36
   8  -4  -7    0.56    0.36
   7  -4  -7    0.01    0.25
   6  -4  -7    0.74    0.34
  -6   4   7    0.34    0.25
   5  -4  -7    0.00    0.19
  -5   4   7    0.30    0.26
   4  -4  -7    3.52    0.63
  -4   4   7    4.85    0.52
   3  -4  -7   19.17    1.08
  -3   4   7   19.37    1.09
   2  -4  -7   19.35    1.04
  -2   4   7   18.95    1.05
   1  -4  -7    2.84    0.49
  -1   4   7    2.17    0.43
  -1   4   7    2.35    0.17
   0  -4  -7    0.07    0.15
   0   4   7   -0.01    0.14
   0   4   7   -0.02    0.05
  -1  -4  -7    0.90    0.23
   1   4   7    0.47    0.21
   1   4   7    0.48    0.08
  -2  -4  -7    5.67    0.53
   2   4   7    6.92    0.56
   2   4   7    6.64    0.30
  -3  -4  -7   41.76    1.03
  -3  -4  -7   42.08    1.49
   3   4   7   43.62    1.43
  -4  -4  -7    9.04    0.50
  -4  -4  -7    9.17    0.68
   4   4   7    9.21    0.60
  -5  -4  -7    7.97    0.63
  -5  -4  -7    8.67    0.55
   5   4   7    8.01    0.56
  -6  -4  -7    6.80    0.62
  -6  -4  -7    8.48    0.58
   6   4   7    7.48    0.51
  -7  -4  -7    7.36    0.59
   7   4   7    7.40    0.66
   7   4   7    7.67    0.49
   8   4   7    0.48    0.30
  -9  -4  -7   21.51    1.19
   9   4   7   19.77    1.21
 -10  -4  -7    7.67    0.79
  10   4   7    7.91    0.81
 -11  -4  -7   10.49    0.92
  11   4   7   10.05    0.89
 -12  -4  -7    0.73    0.36
  12   4   7    0.83    0.26
   8  -5  -7    2.25    0.62
   7  -5  -7    0.56    0.45
   6  -5  -7    2.84    0.68
  -6   5   7    2.28    0.48
   5  -5  -7   11.44    0.95
  -5   5   7   12.62    0.90
   4  -5  -7    8.31    0.79
  -4   5   7    8.74    0.75
   3  -5  -7    2.86    0.55
  -3   5   7    3.53    0.53
   2  -5  -7   69.58    2.20
  -2   5   7   68.23    2.13
   1  -5  -7    0.28    0.18
  -1   5   7    0.57    0.17
   0  -5  -7    0.52    0.24
   0   5   7    0.97    0.25
  -1  -5  -7    5.29    0.54
   1   5   7    4.50    0.47
  -2  -5  -7   23.13    1.11
   2   5   7   20.22    0.99
  -3  -5  -7    6.86    0.58
  -3  -5  -7    6.60    0.32
   3   5   7    7.00    0.55
  -4  -5  -7   20.81    1.06
  -4  -5  -7   19.75    0.70
   4   5   7   19.74    0.93
  -5  -5  -7  158.29    3.01
  -5  -5  -7  154.93    3.55
   5   5   7  160.02    3.25
  -6  -5  -7    0.07    0.16
  -6  -5  -7    0.60    0.15
   6   5   7    0.11    0.14
  -7  -5  -7    5.17    0.53
  -7  -5  -7    3.95    0.42
   7   5   7    4.81    0.40
  -8  -5  -7   25.20    1.16
   8   5   7   24.58    1.28
  -9  -5  -7    1.82    0.35
   9   5   7    1.53    0.45
 -10  -5  -7    1.73    0.38
  10   5   7    0.52    0.34
 -11  -5  -7    3.56    0.70
  11   5   7    3.24    0.70
 -12  -5  -7    6.47    0.72
  12   5   7    5.19    0.94
   7  -6  -7    3.20    0.76
   6  -6  -7    4.20    0.84
  -6   6   7    5.07    0.77
   5  -6  -7    1.66    0.33
   4  -6  -7    0.52    0.30
  -4   6   7    1.29    0.34
   3  -6  -7    3.30    0.61
  -3   6   7    3.34    0.60
   2  -6  -7    4.64    0.70
  -2   6   7    6.25    0.62
   1  -6  -7    7.47    0.66
  -1   6   7    7.39    0.66
   0  -6  -7   25.88    1.23
   0   6   7   27.41    1.26
  -1  -6  -7    5.26    0.58
   1   6   7    4.68    0.50
  -2  -6  -7   20.44    1.08
   2   6   7   20.45    1.02
  -3  -6  -7   57.15    1.09
  -3  -6  -7   59.88    1.93
   3   6   7   57.61    1.78
  -4  -6  -7   63.00    1.38
  -4  -6  -7   65.56    2.05
   4   6   7   62.47    1.84
  -5  -6  -7   35.38    1.46
  -5  -6  -7   34.92    1.07
   5   6   7   34.72    1.27
  -6  -6  -7   23.41    1.20
  -6  -6  -7   23.57    0.95
   6   6   7   22.96    0.98
  -7  -6  -7   18.19    1.10
  -7  -6  -7   17.65    0.90
   7   6   7   17.14    0.81
  -8  -6  -7    1.69    0.40
   8   6   7    1.78    0.45
  -9  -6  -7    6.29    0.65
   9   6   7    6.87    0.94
 -10  -6  -7    6.25    0.67
  10   6   7    8.00    0.80
 -11  -6  -7    0.12    0.21
  11   6   7    0.45    0.28
 -12  -6  -7    6.42    0.99
  12   6   7    5.25    0.94
   7  -7  -7    1.05    0.32
   6  -7  -7    8.52    0.88
  -6   7   7    7.59    1.00
   5  -7  -7    0.48    0.34
  -5   7   7    0.80    0.27
   4  -7  -7    0.11    0.23
  -4   7   7    0.81    0.39
   3  -7  -7   18.32    1.19
  -3   7   7   18.10    1.11
   2  -7  -7   13.65    0.97
  -2   7   7   13.41    0.94
   1  -7  -7   40.89    1.69
  -1   7   7   41.30    1.64
   0  -7  -7    2.86    0.55
   0   7   7    3.31    0.54
  -1  -7  -7   36.71    1.55
   1   7   7   35.43    1.46
  -2  -7  -7   72.12    2.23
   2   7   7   73.86    2.17
  -3  -7  -7    6.05    0.60
   3   7   7    6.52    0.61
  -4  -7  -7  127.11    2.33
  -4  -7  -7  128.82    3.20
   4   7   7  126.47    2.98
  -5  -7  -7    1.30    0.41
  -5  -7  -7    1.61    0.28
   5   7   7    2.05    0.38
  -6  -7  -7   17.38    1.04
  -6  -7  -7   17.74    0.80
   6   7   7   15.88    0.86
  -7  -7  -7   12.17    0.73
  -7  -7  -7   11.30    0.91
   7   7   7   12.01    0.68
  -8  -7  -7   17.78    1.13
  -8  -7  -7   16.14    0.91
  -9  -7  -7    6.52    0.64
   9   7   7    7.46    0.78
 -10  -7  -7    6.67    0.65
  10   7   7    5.03    0.82
 -11  -7  -7   15.62    1.17
  11   7   7   15.02    1.20
 -12  -7  -7   14.97    1.21
  12   7   7   14.79    1.24
   6  -8  -7    4.70    0.87
   5  -8  -7    2.67    0.65
  -5   8   7    2.88    0.63
   4  -8  -7    7.04    0.85
  -4   8   7    7.42    0.81
   3  -8  -7   17.76    1.22
  -3   8   7   17.73    1.17
   2  -8  -7    0.56    0.32
  -2   8   7    0.63    0.24
   1  -8  -7    0.17    0.16
  -1   8   7   -0.26    0.10
   0  -8  -7   30.23    1.44
   0   8   7   29.33    1.39
  -1  -8  -7   10.29    0.84
   1   8   7   10.16    0.82
  -2  -8  -7   -0.02    0.20
   2   8   7    0.39    0.14
  -3  -8  -7   26.10    1.30
   3   8   7   24.79    1.19
  -4  -8  -7    0.93    0.27
   4   8   7    0.30    0.20
  -5  -8  -7    0.99    0.38
  -5  -8  -7    0.08    0.15
   5   8   7    0.21    0.23
  -6  -8  -7   24.85    1.30
  -6  -8  -7   25.70    1.02
   6   8   7   26.72    1.14
  -7  -8  -7   42.18    1.46
  -7  -8  -7   42.19    1.77
   7   8   7   42.10    1.45
  -8  -8  -7    2.45    0.47
  -8  -8  -7    1.64    0.42
   8   8   7    1.95    0.39
  -9  -8  -7    5.67    0.56
   9   8   7    4.49    0.76
 -10  -8  -7    1.70    0.41
  10   8   7    0.88    0.32
  11   8   7    0.10    0.41
 -12  -8  -7    9.45    0.89
  12   8   7    8.62    0.91
   5  -9  -7    1.03    0.52
  -5   9   7    2.00    0.51
   4  -9  -7    0.34    0.34
   3  -9  -7    1.02    0.40
  -3   9   7    1.10    0.41
   2  -9  -7    1.53    0.40
  -2   9   7    0.47    0.28
   1  -9  -7    1.80    0.40
  -1   9   7    1.23    0.45
   0  -9  -7    5.91    0.66
   0   9   7    6.25    0.71
  -1  -9  -7    5.65    0.64
   1   9   7    5.17    0.76
  -2  -9  -7    6.38    0.70
   2   9   7    7.25    0.69
  -3  -9  -7   -0.26    0.11
   3   9   7   -0.07    0.13
  -4  -9  -7    1.08    0.32
   4   9   7    0.89    0.26
  -5  -9  -7   12.58    0.92
   5   9   7   12.91    0.85
  -6  -9  -7    0.95    0.36
   6   9   7    0.77    0.31
  -7  -9  -7    6.68    0.59
  -7  -9  -7    6.65    0.68
   7   9   7    7.45    0.65
  -8  -9  -7   14.68    0.93
  -8  -9  -7   14.91    1.08
   8   9   7   14.53    0.83
  -9  -9  -7    0.90    0.29
   9   9   7    0.06    0.30
 -10  -9  -7    1.85    0.45
  10   9   7    2.18    0.49
  11   9   7    5.15    0.84
   4 -10  -7    1.10    0.40
  -4  10   7    1.91    0.46
   3 -10  -7    1.63    0.40
  -3  10   7    1.39    0.40
   2 -10  -7    1.52    0.36
  -2  10   7    0.33    0.38
   1 -10  -7    6.92    0.78
  -1  10   7    6.42    0.72
   0 -10  -7    0.33    0.31
   0  10   7    0.43    0.18
  -1 -10  -7    0.08    0.19
   1  10   7    0.43    0.18
  -2 -10  -7    2.16    0.53
   2  10   7    2.25    0.52
  -3 -10  -7   14.17    1.01
   3  10   7   13.59    0.97
  -4 -10  -7    0.09    0.23
   4  10   7    0.37    0.24
  -5 -10  -7    0.43    0.28
   5  10   7    0.43    0.24
  -6 -10  -7   11.72    0.91
   6  10   7   11.11    0.83
  -7 -10  -7    0.39    0.31
   7  10   7    0.45    0.24
  -8 -10  -7   18.34    1.18
   8  10   7   16.54    1.00
  -9 -10  -7    0.14    0.31
   9  10   7    0.72    0.34
 -10 -10  -7    0.93    0.47
  10  10   7    1.89    0.44
 -11 -10  -7    3.96    0.69
  11  10   7    0.99    0.48
   3 -11  -7    2.86    0.50
  -3  11   7    2.62    0.48
   2 -11  -7    0.68    0.23
  -2  11   7   -0.40    0.20
   1 -11  -7    0.25    0.20
  -1  11   7    0.07    0.31
   0 -11  -7    2.65    0.51
   0  11   7    2.49    0.63
  -1 -11  -7    1.31    0.37
   1  11   7    1.08    0.47
  -2 -11  -7    0.29    0.32
   2  11   7    0.16    0.19
  -3 -11  -7   11.68    0.96
   3  11   7   12.25    0.93
   4  11   7   -0.09    0.23
  -5 -11  -7    3.37    0.64
   5  11   7    3.35    0.67
  -6 -11  -7    9.17    0.84
   6  11   7    9.60    0.79
  -7 -11  -7   36.43    1.74
   7  11   7   36.57    1.63
  -8 -11  -7    0.31    0.20
   8  11   7    0.29    0.32
   9  11   7    1.91    0.52
  10  11   7    7.60    0.78
   2 -12  -7    3.06    0.77
  -2  12   7    2.05    0.61
   1 -12  -7    2.67    0.69
  -1  12   7    2.25    0.71
   0 -12  -7    4.57    0.77
   0  12   7    3.32    0.65
  -1 -12  -7    9.00    0.93
   1  12   7   10.96    0.98
  -2 -12  -7   23.86    1.44
   2  12   7   23.41    1.47
  -3 -12  -7    2.26    0.59
   3  12   7    2.25    0.52
  -4 -12  -7    0.31    0.26
   4  12   7    0.72    0.23
  -5 -12  -7   26.13    1.43
   5  12   7   25.35    1.44
  -6 -12  -7    6.85    0.76
   6  12   7    5.73    0.83
  -7 -12  -7    3.28    0.78
   7  12   7    2.51    0.56
  -8 -12  -7    4.34    0.75
   8  12   7    4.27    0.73
   9  12   7    6.78    0.95
  -1 -13  -7    1.96    0.56
   1  13   7    1.34    0.51
  -2 -13  -7    0.72    0.42
   2  13   7    0.40    0.33
  -3 -13  -7    0.87    0.50
   3  13   7    0.22    0.42
   4  13   7   11.76    1.09
   5  13   7    4.14    0.80
   6  13   7    3.76    0.70
   7  13   7    6.86    0.81
   1   6  -8    1.11    0.43
  -1  -6   8    3.08    0.72
   0   6  -8   10.31    1.03
   0  -6   8    9.36    1.03
  -1   6  -8    0.02    0.37
   1  -6   8    0.63    0.37
  -2   6  -8    3.50    0.68
   2  -6   8    2.73    0.71
   4   5  -8    0.91    0.34
  -4  -5   8    1.06    0.50
   3   5  -8    0.09    0.33
  -3  -5   8    0.23    0.40
   2   5  -8   19.57    1.34
  -2  -5   8   18.07    1.33
   1   5  -8    1.49    0.56
  -1  -5   8    1.14    0.47
   0  -5   8    0.45    0.32
  -1   5  -8    7.11    0.78
   1  -5   8    6.87    0.80
  -2   5  -8    9.44    0.91
   2  -5   8    8.34    0.92
  -3   5  -8    0.25    0.22
   3  -5   8    0.04    0.31
  -4   5  -8    1.44    0.54
   4  -5   8    1.15    0.51
  -5   5  -8   13.65    1.08
   5  -5   8   15.81    1.32
   5   4  -8    0.96    0.34
  -5  -4   8    0.72    0.45
   4   4  -8   11.65    1.02
  -4  -4   8   12.10    1.10
   3   4  -8   25.47    1.52
  -3  -4   8   24.03    1.49
   2   4  -8    2.38    0.65
  -2  -4   8    2.53    0.62
   1   4  -8   24.18    1.47
  -1  -4   8   26.42    1.50
   0   4  -8   10.04    0.92
   0  -4   8    9.56    0.92
  -1   4  -8   10.66    0.95
   1  -4   8    8.92    0.94
  -2   4  -8    0.25    0.33
   2  -4   8    0.08    0.26
  -3   4  -8    4.49    0.70
   3  -4   8    3.75    0.72
  -4   4  -8   21.29    1.31
   4  -4   8   23.33    1.43
  -5   4  -8   10.64    0.93
   5  -4   8   11.49    1.01
   6  -4   8   24.98    1.58
   7  -4   8    7.86    0.93
   6   3  -8    2.84    0.69
  -6  -3   8    3.28    0.78
   5   3  -8    7.44    0.76
  -5  -3   8    6.90    0.80
   4   3  -8   17.31    1.20
  -4  -3   8   15.23    1.18
   3   3  -8    2.93    0.55
  -3  -3   8    2.82    0.59
   2   3  -8   12.59    1.00
  -2  -3   8   13.88    1.03
   1   3  -8   21.29    1.30
  -1  -3   8   20.76    1.24
   0   3  -8    0.46    0.22
   0  -3   8    0.02    0.12
  -1   3  -8   18.13    1.17
   1  -3   8   17.65    1.14
  -2   3  -8   22.20    1.27
   2  -3   8   21.93    1.29
  -3   3  -8    5.46    0.65
   3  -3   8    4.76    0.74
  -4   3  -8   16.51    1.09
   4  -3   8   18.54    1.21
  -5   3  -8    2.76    0.59
   5  -3   8    2.35    0.60
  -6   3  -8   14.72    1.01
   6  -3   8   14.57    1.16
   7  -3   8   -0.37    0.19
  -8   3  -8   -0.68    0.31
   7   2  -8    2.56    0.62
  -7  -2   8    2.42    0.61
   6   2  -8    4.86    0.79
  -6  -2   8    4.62    0.79
   5   2  -8    0.67    0.38
  -5  -2   8    0.21    0.39
   4   2  -8    3.63    0.64
  -4  -2   8    3.38    0.62
   3   2  -8    5.21    0.78
  -3  -2   8    6.23    0.67
   2   2  -8    1.70    0.43
  -2  -2   8    1.87    0.50
   1   2  -8    0.46    0.21
  -1  -2   8    0.12    0.21
   0   2  -8   35.16    1.59
   0  -2   8   31.77    1.47
  -1   2  -8    8.36    0.76
   1  -2   8    7.97    0.73
  -2   2  -8    2.26    0.51
   2  -2   8    2.26    0.52
  -3   2  -8   21.76    1.22
   3  -2   8   20.86    1.20
  -4   2  -8    3.79    0.60
   4  -2   8    3.28    0.62
  -5   2  -8    2.50    0.51
   5  -2   8    2.36    0.50
  -6   2  -8    2.27    0.43
   6  -2   8    2.08    0.48
  -7   2  -8    6.38    0.68
  -8   2  -8    2.40    0.61
  -9   2  -8    0.57    0.50
   7   1  -8    0.75    0.39
  -7  -1   8    0.71    0.38
   6   1  -8    4.24    0.71
  -6  -1   8    4.35    0.72
   5   1  -8   17.00    1.14
  -5  -1   8   15.57    1.09
   4   1  -8    2.42    0.49
  -4  -1   8    3.15    0.56
   3   1  -8    8.71    0.83
  -3  -1   8    7.34    0.71
   2   1  -8   17.09    1.10
  -2  -1   8   15.98    1.00
   1   1  -8   -0.06    0.19
  -1  -1   8    0.55    0.18
   0   1  -8   13.10    0.90
   0  -1   8   12.12    0.82
  -1   1  -8   23.39    1.21
   1  -1   8   26.02    1.22
  -2   1  -8   17.67    1.03
   2  -1   8   18.19    1.01
  -3   1  -8    2.50    0.45
   3  -1   8    3.11    0.51
  -4   1  -8    0.33    0.13
   4  -1   8    0.28    0.18
  -5   1  -8    0.84    0.22
   5  -1   8    0.47    0.26
   5  -1   8    1.03    0.33
  -6   1  -8    5.23    0.60
  -6   1  -8    3.51    0.54
   6  -1   8    3.96    0.42
  -7   1  -8    2.40    0.60
   7  -1   8    2.33    0.42
  -8   1  -8   12.43    1.07
   8  -1   8   12.07    0.89
  -9   1  -8    0.04    0.22
   9  -1   8   -0.25    0.21
 -10   1  -8    1.09    0.37
  10  -1   8    0.45    0.53
   6   0  -8    0.28    0.28
  -6   0   8   -0.13    0.24
   5   0  -8    5.88    0.65
  -5   0   8    5.62    0.63
   4   0  -8    8.68    0.82
   4   0  -8    8.28    0.71
  -4   0   8    9.36    0.74
   3   0  -8   12.93    0.80
   3   0  -8   12.66    0.92
  -3   0   8   13.53    0.87
   2   0  -8   12.15    0.89
   2   0  -8   12.16    0.74
  -2   0   8   14.13    0.87
   1   0  -8    5.57    0.49
   1   0  -8    5.07    0.58
  -1   0   8    5.89    0.56
   0   0  -8    0.64    0.24
   0   0  -8    0.03    0.18
   0   0   8    0.29    0.20
  -1   0  -8    6.75    0.53
  -1   0  -8    5.82    0.60
   1   0   8    6.00    0.55
  -2   0  -8   18.73    1.03
  -2   0  -8   17.69    0.82
   2   0   8   18.10    0.95
  -3   0  -8    7.55    0.56
  -3   0  -8    7.36    0.64
   3   0   8    8.35    0.66
  -4   0  -8   19.29    1.01
   4   0   8   17.18    0.83
   4   0   8   17.05    1.00
  -5   0  -8   10.09    0.75
  -5   0  -8   10.43    0.73
   5   0   8    9.82    0.64
  -6   0  -8    6.90    0.61
  -6   0  -8    8.46    0.73
   6   0   8    8.05    0.64
  -7   0  -8    0.21    0.18
   7   0   8    0.19    0.20
  -8   0  -8   12.02    0.97
   8   0   8   11.56    0.88
  -9   0  -8    4.44    0.83
   9   0   8    3.75    0.66
 -10   0  -8    0.46    0.44
 -11   0  -8    2.21    0.66
   7  -1  -8    2.39    0.53
   6  -1  -8    5.50    0.67
  -6   1   8    3.73    0.67
   5  -1  -8    1.41    0.29
  -5   1   8    0.60    0.22
  -5   1   8   -0.10    0.24
   4  -1  -8    4.04    0.62
   4  -1  -8    4.68    0.72
  -4   1   8    3.74    0.58
   3  -1  -8   11.32    0.87
   3  -1  -8   11.11    0.76
  -3   1   8   11.75    0.76
   2  -1  -8    0.36    0.20
   2  -1  -8    0.57    0.30
  -2   1   8    0.49    0.19
   1  -1  -8    0.01    0.18
   1  -1  -8    0.18    0.15
  -1   1   8   -0.08    0.13
   0  -1  -8   66.94    1.83
   0  -1  -8   62.12    2.03
   0   1   8   65.32    1.79
  -1  -1  -8   53.50    1.60
  -1  -1  -8   55.17    1.84
   1   1   8   55.22    1.62
  -2  -1  -8    8.28    0.66
  -2  -1  -8    8.30    0.61
   2   1   8    8.52    0.60
  -3  -1  -8   84.70    2.31
  -3  -1  -8   84.05    2.13
   3   1   8   83.60    2.16
  -4  -1  -8   24.65    1.13
  -4  -1  -8   25.20    1.10
  -4  -1  -8   24.20    1.07
  -5  -1  -8    1.92    0.37
  -5  -1  -8    2.92    0.46
   5   1   8    2.21    0.39
  -6  -1  -8    7.22    0.65
  -6  -1  -8    6.60    0.54
   6   1   8    6.86    0.58
  -7  -1  -8   60.85    2.09
   7   1   8   64.13    2.03
  -8  -1  -8    0.97    0.44
   8   1   8    0.29    0.21
  -9  -1  -8    2.02    0.57
   9   1   8    2.10    0.45
 -10  -1  -8    9.40    0.91
  10   1   8    8.74    0.80
 -11  -1  -8    1.26    0.60
  11   1   8    2.13    0.57
   8  -2  -8    3.86    0.82
   7  -2  -8    0.55    0.37
   6  -2  -8    1.56    0.36
  -6   2   8    0.92    0.35
   5  -2  -8    5.20    0.74
  -5   2   8    4.90    0.79
   4  -2  -8   19.05    1.11
  -4   2   8   19.59    1.15
   3  -2  -8   12.39    0.85
  -3   2   8   10.91    0.68
  -3   2   8   12.00    0.91
   2  -2  -8    1.22    0.29
   2  -2  -8    0.59    0.29
  -2   2   8    0.47    0.18
   1  -2  -8   54.25    1.89
   1  -2  -8   52.50    1.72
  -1   2   8   54.34    1.49
   0  -2  -8    6.92    0.55
   0  -2  -8    7.64    0.66
   0   2   8    7.02    0.47
  -1  -2  -8   16.48    0.87
  -1  -2  -8   15.93    0.95
   1   2   8   16.02    0.74
  -2  -2  -8  116.20    2.74
  -2  -2  -8  119.77    2.89
   2   2   8  119.54    2.51
  -3  -2  -8    7.25    0.60
  -3  -2  -8    6.78    0.60
   3   2   8    7.43    0.52
  -4  -2  -8    0.44    0.19
  -4  -2  -8    0.73    0.24
  -4  -2  -8    1.33    0.28
  -5  -2  -8   19.73    1.02
  -5  -2  -8   21.31    1.00
  -5  -2  -8   21.77    0.99
  -6  -2  -8   12.14    0.78
  -6  -2  -8   11.58    0.73
   6   2   8   12.06    0.81
  -7  -2  -8    2.52    0.45
   7   2   8    2.21    0.46
   7   2   8    2.85    0.42
  -8  -2  -8   13.85    0.95
   8   2   8   13.90    0.95
  -9  -2  -8   16.80    1.12
   9   2   8   16.27    1.09
 -10  -2  -8    1.82    0.59
  10   2   8    1.84    0.43
 -11  -2  -8    2.38    0.60
  11   2   8    3.78    0.73
   7  -3  -8    1.11    0.38
   6  -3  -8    0.82    0.34
  -6   3   8   -0.13    0.34
   5  -3  -8   -0.08    0.23
  -5   3   8    0.69    0.26
   4  -3  -8    2.75    0.52
  -4   3   8    3.39    0.67
   3  -3  -8    5.74    0.60
  -3   3   8    5.16    0.61
   2  -3  -8   92.24    2.58
  -2   3   8   94.46    2.67
   1  -3  -8   13.71    0.84
  -1   3   8   13.96    0.91
  -1   3   8   13.63    0.60
   0  -3  -8    1.53    0.35
   0   3   8    1.94    0.23
   0   3   8    1.97    0.40
  -1  -3  -8   21.38    1.03
   1   3   8   20.63    1.07
   1   3   8   21.72    0.76
  -2  -3  -8    7.90    0.63
   2   3   8    6.95    0.43
   2   3   8    7.86    0.62
  -3  -3  -8   21.11    1.03
   3   3   8   18.68    0.78
  -4  -3  -8   51.22    1.68
  -4  -3  -8   49.18    1.40
   4   3   8   48.47    1.61
  -5  -3  -8    3.05    0.37
  -5  -3  -8    3.33    0.52
   5   3   8    4.03    0.42
  -6  -3  -8   28.67    1.32
  -6  -3  -8   31.17    1.23
   6   3   8   28.74    1.14
  -7  -3  -8   11.28    0.79
   7   3   8   12.08    0.68
   7   3   8   11.70    0.84
  -8  -3  -8    2.45    0.51
   8   3   8    3.00    0.50
  -9  -3  -8    5.55    0.60
   9   3   8    4.96    0.72
 -10  -3  -8   18.79    1.23
  10   3   8   18.88    1.20
 -11  -3  -8   12.49    1.08
  11   3   8   12.99    1.02
 -12  -3  -8    2.49    0.59
  12   3   8    2.11    0.54
   7  -4  -8    0.20    0.19
   6  -4  -8    1.52    0.34
  -6   4   8    0.11    0.25
   5  -4  -8    7.35    1.01
  -5   4   8    6.31    0.68
   4  -4  -8    7.06    0.70
  -4   4   8    5.59    0.64
   3  -4  -8    1.18    0.36
  -3   4   8    1.54    0.46
   2  -4  -8   35.10    1.52
  -2   4   8   35.31    1.54
   1  -4  -8    3.04    0.49
  -1   4   8    2.95    0.55
   0  -4  -8    0.55    0.22
   0   4   8    0.09    0.21
  -1  -4  -8    9.46    0.70
   1   4   8   10.60    0.40
   1   4   8   10.93    0.78
  -2  -4  -8   20.61    1.06
   2   4   8   20.93    1.07
   2   4   8   20.78    0.66
  -3  -4  -8   23.14    1.12
   3   4   8   23.42    0.78
   3   4   8   22.84    1.09
  -4  -4  -8    2.72    0.44
  -4  -4  -8    2.38    0.28
   4   4   8    2.67    0.45
  -5  -4  -8   46.01    1.68
  -5  -4  -8   43.80    1.33
   5   4   8   44.11    1.48
  -6  -4  -8   85.80    2.53
  -6  -4  -8   86.00    2.17
   6   4   8   83.12    2.14
  -7  -4  -8    3.35    0.53
  -7  -4  -8    3.06    0.55
   7   4   8    2.96    0.34
  -8  -4  -8    0.58    0.32
   8   4   8    1.12    0.32
  -9  -4  -8   -0.18    0.12
 -10  -4  -8    1.96    0.41
  10   4   8    1.66    0.49
  11   4   8    0.10    0.19
 -12  -4  -8    1.69    0.55
  12   4   8    1.75    0.59
   7  -5  -8   -0.23    0.22
   6  -5  -8    2.23    0.53
  -6   5   8    2.83    0.47
   5  -5  -8    1.91    0.57
  -5   5   8    1.35    0.43
   4  -5  -8    1.77    0.45
  -4   5   8    1.30    0.45
   3  -5  -8   13.92    0.99
  -3   5   8   13.58    0.95
   2  -5  -8    6.90    0.69
  -2   5   8    7.83    0.70
   1  -5  -8    4.63    0.56
  -1   5   8    5.28    0.60
   0  -5  -8   15.41    0.95
   0   5   8   14.50    0.94
  -1  -5  -8   19.22    1.04
   1   5   8   18.10    1.03
  -2  -5  -8    0.39    0.26
   2   5   8    0.21    0.20
  -3  -5  -8    7.38    0.66
   3   5   8    8.35    0.66
  -4  -5  -8    0.39    0.23
  -4  -5  -8    0.93    0.23
   4   5   8    0.74    0.28
  -5  -5  -8    2.13    0.34
  -5  -5  -8    2.16    0.42
   5   5   8    2.27    0.38
  -6  -5  -8   14.82    0.97
  -6  -5  -8   14.83    0.78
   6   5   8   14.33    0.81
  -7  -5  -8    2.71    0.58
  -7  -5  -8    3.60    0.53
   7   5   8    3.42    0.36
  -8  -5  -8    5.07    0.53
   8   5   8    5.13    0.62
  -9  -5  -8    9.22    0.78
   9   5   8    9.38    0.85
 -10  -5  -8    6.16    0.70
  10   5   8    6.20    0.71
 -11  -5  -8    0.69    0.33
  11   5   8    0.36    0.29
 -12  -5  -8    8.17    0.88
  12   5   8    6.64    1.04
   7  -6  -8    0.37    0.52
   6  -6  -8    4.89    0.85
  -6   6   8    6.13    0.71
   5  -6  -8    2.87    0.63
  -5   6   8    1.83    0.44
   4  -6  -8    1.64    0.53
  -4   6   8    1.68    0.36
   3  -6  -8    4.94    0.59
  -3   6   8    4.94    0.78
   2  -6  -8    6.54    0.69
  -2   6   8    5.39    0.62
   1  -6  -8    0.59    0.32
  -1   6   8    0.07    0.22
   0  -6  -8    0.61    0.27
   0   6   8    0.25    0.17
  -1  -6  -8    4.10    0.61
   1   6   8    4.21    0.48
  -2  -6  -8   11.91    0.86
   2   6   8   14.42    0.88
  -3  -6  -8    6.01    0.64
   3   6   8    5.63    0.56
  -4  -6  -8   66.49    2.17
   4   6   8   68.67    2.04
  -5  -6  -8   57.01    1.98
  -5  -6  -8   56.39    1.44
   5   6   8   58.17    1.80
  -6  -6  -8   46.29    1.80
  -6  -6  -8   42.83    1.35
   6   6   8   44.10    1.49
  -7  -6  -8    2.81    0.42
  -7  -6  -8    2.27    0.57
   7   6   8    2.95    0.44
  -8  -6  -8    3.82    0.43
  -8  -6  -8    2.80    0.59
  -9  -6  -8    0.05    0.13
   9   6   8    0.86    0.30
 -10  -6  -8    4.23    0.69
  10   6   8    3.76    0.76
 -11  -6  -8   18.42    1.19
  11   6   8   18.70    1.35
 -12  -6  -8    3.56    0.65
  12   6   8    2.68    0.62
   6  -7  -8    2.20    0.43
   5  -7  -8    0.55    0.25
  -5   7   8   -0.22    0.26
   4  -7  -8    1.68    0.57
   3  -7  -8    4.20    0.70
  -3   7   8    3.11    0.55
   2  -7  -8    0.66    0.22
  -2   7   8    0.19    0.25
   1  -7  -8   15.85    1.04
  -1   7   8   15.13    1.03
   0  -7  -8    9.10    0.81
   0   7   8    8.30    0.75
  -1  -7  -8    1.57    0.43
   1   7   8    0.84    0.30
  -2  -7  -8   17.77    1.09
   2   7   8   17.97    1.04
  -3  -7  -8    2.30    0.51
   3   7   8    2.40    0.46
  -4  -7  -8    1.37    0.40
   4   7   8    1.72    0.39
  -5  -7  -8   29.34    1.42
   5   7   8   28.03    1.23
  -6  -7  -8   34.16    1.58
  -6  -7  -8   34.52    1.14
   6   7   8   36.23    1.38
  -7  -7  -8   17.09    1.13
  -7  -7  -8   17.57    0.88
   7   7   8   17.36    0.91
  -8  -7  -8    3.62    0.65
  -8  -7  -8    4.17    0.44
  -9  -7  -8   14.05    0.90
   9   7   8   13.07    1.01
 -10  -7  -8    0.18    0.25
  10   7   8    0.64    0.31
 -11  -7  -8    8.00    0.86
  11   7   8    8.07    0.94
 -12  -7  -8    9.62    0.89
  12   7   8    7.99    0.90
   6  -8  -8    2.10    0.70
   5  -8  -8   -0.14    0.19
  -5   8   8   -0.59    0.21
   4  -8  -8    1.25    0.31
  -4   8   8   -0.12    0.24
   3  -8  -8   10.37    0.91
  -3   8   8    9.03    0.86
   2  -8  -8    4.30    0.75
  -2   8   8    4.18    0.70
   1  -8  -8   -0.07    0.19
  -1   8   8    0.66    0.22
   0  -8  -8   13.79    1.01
   0   8   8   14.10    0.97
  -1  -8  -8   70.60    2.36
   1   8   8   69.79    2.30
  -2  -8  -8    2.19    0.50
   2   8   8    3.25    0.56
  -3  -8  -8    7.96    0.80
   3   8   8    7.39    0.68
  -4  -8  -8   19.38    1.19
   4   8   8   19.48    1.08
  -5  -8  -8    1.98    0.47
   5   8   8    1.42    0.37
  -6  -8  -8    0.90    0.32
  -7  -8  -8   30.85    1.65
  -7  -8  -8   30.65    1.54
   7   8   8   30.30    1.25
  -8  -8  -8   18.78    0.99
  -8  -8  -8   19.09    1.22
  -9  -8  -8    0.24    0.30
   9   8   8    0.39    0.22
 -10  -8  -8   37.07    1.63
  10   8   8   35.45    1.85
 -11  -8  -8   18.34    1.23
  11   8   8   20.30    1.38
 -12  -8  -8    5.84    0.70
  12   8   8    3.39    0.76
   5  -9  -8    8.76    0.95
  -5   9   8    5.67    0.83
   4  -9  -8   13.58    1.11
  -4   9   8   11.91    1.06
   3  -9  -8    0.26    0.18
  -3   9   8    0.22    0.39
   2  -9  -8    3.79    0.78
  -2   9   8    4.44    0.74
   1  -9  -8    3.67    0.69
  -1   9   8    3.94    0.73
   0  -9  -8    8.54    0.84
   0   9   8    9.53    0.86
  -1  -9  -8    0.56    0.21
   1   9   8   -0.17    0.22
  -2  -9  -8    0.28    0.26
   2   9   8    0.36    0.21
  -3  -9  -8   20.07    1.24
   3   9   8   20.60    1.18
  -4  -9  -8    4.59    0.76
   4   9   8    3.98    0.65
  -5  -9  -8   30.02    1.53
   5   9   8   31.92    1.42
  -6  -9  -8   26.23    1.42
   6   9   8   27.02    1.26
  -7  -9  -8    3.89    0.70
   7   9   8    3.85    0.58
  -8  -9  -8    6.86    0.76
   8   9   8    6.25    0.57
   9   9   8   15.99    1.16
 -10  -9  -8    5.90    0.67
  10   9   8    4.75    0.86
 -11  -9  -8    3.59    0.66
  11   9   8    2.44    0.63
   4 -10  -8   -0.09    0.31
  -4  10   8    0.02    0.37
   3 -10  -8    1.73    0.67
  -3  10   8    2.56    0.49
   2 -10  -8    2.22    0.63
  -2  10   8    2.19    0.60
   1 -10  -8    1.23    0.51
  -1  10   8    1.89    0.51
   0 -10  -8    3.97    0.77
   0  10   8    5.10    0.77
  -1 -10  -8    1.44    0.34
   1  10   8    0.59    0.27
  -2 -10  -8    2.03    0.52
   2  10   8    1.71    0.48
  -3 -10  -8    0.84    0.43
   3  10   8    0.32    0.30
  -4 -10  -8    1.06    0.41
   4  10   8    1.60    0.41
  -5 -10  -8    5.82    0.85
   5  10   8    6.34    0.64
  -6 -10  -8    2.49    0.59
   6  10   8    2.41    0.49
  -7 -10  -8   16.07    1.13
   7  10   8   15.62    0.96
  -8 -10  -8    2.42    0.58
   8  10   8    2.78    0.51
  -9 -10  -8    1.29    0.51
  10  10   8    3.18    0.58
  11  10   8    2.59    0.72
   3 -11  -8    2.83    0.58
  -3  11   8    1.54    0.38
   2 -11  -8    0.40    0.30
  -2  11   8   -0.36    0.32
   1 -11  -8    1.83    0.47
  -1  11   8    1.41    0.44
   0 -11  -8    0.64    0.25
   0  11   8   -0.14    0.30
  -1 -11  -8    8.72    0.89
   1  11   8    6.67    0.79
  -2 -11  -8   11.56    1.02
   2  11   8   12.35    0.99
  -3 -11  -8    0.60    0.26
   3  11   8   -0.06    0.22
  -4 -11  -8    0.67    0.31
   4  11   8    0.27    0.22
  -5 -11  -8   -0.15    0.16
   5  11   8   -0.05    0.23
  -6 -11  -8    5.99    0.92
   6  11   8    5.81    0.70
  -7 -11  -8    3.42    0.61
   7  11   8    2.67    0.55
  -8 -11  -8    0.67    0.38
   8  11   8    0.34    0.26
  -9 -11  -8    3.53    0.74
  10  11   8    1.40    0.32
   1 -12  -8    1.29    0.53
  -1  12   8    1.06    0.51
   0 -12  -8    3.04    0.61
   0  12   8    2.01    0.48
  -1 -12  -8    0.89    0.46
   1  12   8    1.11    0.41
  -2 -12  -8   -0.36    0.20
   2  12   8    0.60    0.27
  -3 -12  -8    0.30    0.36
   3  12   8    1.51    0.31
  -4 -12  -8   -0.04    0.24
   4  12   8    0.59    0.38
  -5 -12  -8    0.84    0.37
   5  12   8    0.91    0.49
  -6 -12  -8    4.64    0.83
   6  12   8    6.17    0.87
  -7 -12  -8    0.87    0.33
   7  12   8    0.71    0.33
  -8 -12  -8    2.31    0.53
   8  12   8    1.11    0.41
   9  12   8    6.52    1.03
  -1 -13  -8    0.80    0.37
   1  13   8    0.50    0.47
  -2 -13  -8   -0.30    0.20
   2  13   8    0.29    0.47
  -3 -13  -8    1.57    0.52
   3  13   8    1.49    0.52
  -4 -13  -8    5.08    0.93
   4  13   8    6.83    0.76
  -5 -13  -8   14.93    1.13
   5  13   8   14.67    1.14
  -6 -13  -8   -0.04    0.25
   6  13   8   -0.59    0.31
  -7 -13  -8    5.76    0.90
   7  13   8    4.33    0.81
  -1  -5   9    1.89    0.52
   0   5  -9    8.38    0.91
   0  -5   9    8.72    0.97
  -1   5  -9    0.50    0.33
   1  -5   9   -0.35    0.21
  -2   5  -9    0.19    0.28
   2  -5   9    0.04    0.43
   3   4  -9    0.38    0.21
  -3  -4   9    0.84    0.42
   2   4  -9    9.08    0.93
  -2  -4   9    7.40    0.88
   1   4  -9   -0.39    0.18
  -1  -4   9    0.77    0.25
   0   4  -9    1.62    0.62
   0  -4   9    1.95    0.50
  -1   4  -9    7.33    1.07
   1  -4   9    6.89    0.81
  -2   4  -9    6.56    0.76
   2  -4   9    7.61    0.85
  -3   4  -9    2.27    0.64
   3  -4   9    3.87    0.72
  -4   4  -9   11.87    1.03
   4  -4   9   11.47    1.09
  -5   4  -9   13.87    1.14
   5  -4   9   14.13    1.22
   4   3  -9    1.65    0.39
  -4  -3   9    0.41    0.40
   3   3  -9    2.42    0.60
  -3  -3   9    2.90    0.55
   2   3  -9    5.14    0.80
  -2  -3   9    5.72    0.89
   1   3  -9   24.25    1.47
  -1  -3   9   25.51    1.48
   0   3  -9   10.06    0.93
   0  -3   9   11.43    0.97
  -1   3  -9   10.47    0.92
   1  -3   9    9.37    0.88
  -2   3  -9   10.64    0.96
   2  -3   9   10.81    0.97
  -3   3  -9    6.30    0.94
   3  -3   9    6.39    0.95
  -4   3  -9    0.36    0.29
   4  -3   9    0.03    0.30
  -5   3  -9   27.54    1.47
   5  -3   9   26.69    1.57
   6  -3   9    8.41    0.91
   7  -3   9    0.80    0.36
   5   2  -9   10.75    1.02
  -5  -2   9    9.96    0.94
   4   2  -9    7.66    0.84
  -4  -2   9    8.52    0.81
   3   2  -9   11.78    1.02
  -3  -2   9   12.75    1.02
   2   2  -9    2.98    0.63
  -2  -2   9    3.50    0.67
   1   2  -9    4.40    0.74
  -1  -2   9    5.07    0.61
   0   2  -9    8.93    0.87
   0  -2   9   10.10    0.86
  -1   2  -9   45.36    1.94
   1  -2   9   41.47    1.79
  -2   2  -9    2.31    0.56
   2  -2   9    1.97    0.50
  -3   2  -9    2.13    0.46
   3  -2   9    2.59    0.54
  -4   2  -9   16.54    1.11
   4  -2   9   18.53    1.17
  -5   2  -9    8.17    0.76
   5  -2   9    6.49    0.77
  -6   2  -9    1.32    0.42
   6  -2   9    0.90    0.41
   7  -2   9   17.39    1.36
  -8   2  -9   16.91    1.31
   6   1  -9    0.20    0.34
   5   1  -9   -0.38    0.22
  -5  -1   9    0.78    0.43
   4   1  -9   10.90    0.99
  -4  -1   9   10.76    0.90
   3   1  -9   -0.18    0.21
  -3  -1   9   -0.09    0.29
   2   1  -9    0.08    0.30
  -2  -1   9    0.38    0.17
   1   1  -9    0.45    0.34
  -1  -1   9    0.87    0.39
   0   1  -9   22.77    1.31
   0  -1   9   23.08    1.22
  -1   1  -9    2.18    0.48
   1  -1   9    1.96    0.47
  -2   1  -9   10.93    0.88
   2  -1   9   12.26    0.89
  -3   1  -9   14.65    1.02
   3  -1   9   15.12    1.01
  -4   1  -9    0.19    0.27
   4  -1   9    0.37    0.22
  -5   1  -9    6.68    0.65
   5  -1   9    5.89    0.67
  -6   1  -9   -0.16    0.19
   6  -1   9   -0.49    0.16
  -7   1  -9    6.09    0.89
  -8   1  -9    1.12    0.41
  -9   1  -9    7.52    1.05
  -6   0   9    1.77    0.56
   5   0  -9    1.24    0.44
   4   0  -9    7.65    0.81
  -4   0   9    8.31    0.78
   3   0  -9    3.14    0.54
  -3   0   9    2.77    0.49
   2   0  -9    1.36    0.36
  -2   0   9    1.45    0.36
   1   0  -9    7.50    0.73
  -1   0   9    6.60    0.62
   0   0  -9    9.67    0.87
   0   0   9    8.96    0.70
  -1   0  -9   21.19    1.23
   1   0   9   21.10    1.09
  -2   0  -9    5.72    0.64
   2   0   9    7.21    0.63
  -3   0  -9    5.28    0.59
   3   0   9    5.20    0.55
  -4   0  -9   28.32    1.34
   4   0   9   30.03    1.36
   4   0   9   28.67    1.13
  -5   0  -9    1.13    0.39
   5   0   9    0.84    0.31
   5   0   9    1.72    0.33
  -6   0  -9    4.77    0.56
  -6   0  -9    5.39    0.60
   6   0   9    5.39    0.55
  -7   0  -9    5.02    0.59
   7   0   9    4.57    0.53
  -8   0  -9    0.15    0.36
   8   0   9    0.05    0.24
  -9   0  -9    2.59    0.69
   9   0   9    3.57    0.64
 -10   0  -9   -0.04    0.23
  10   0   9    0.73    0.43
  -6   1   9    5.85    0.86
  -5   1   9   11.13    0.99
   4  -1  -9    6.64    0.75
   4  -1  -9    7.34    0.69
   3  -1  -9    3.16    0.64
   3  -1  -9    4.83    0.50
  -3   1   9    3.61    0.58
   2  -1  -9    0.20    0.20
   2  -1  -9   -0.30    0.16
  -2   1   9   -0.24    0.16
   1  -1  -9   25.91    1.36
   1  -1  -9   26.11    1.14
  -1   1   9   25.28    1.14
   0  -1  -9   12.93    0.94
   0  -1  -9   13.50    0.80
   0   1   9   12.33    0.76
  -1  -1  -9   11.01    0.72
  -1  -1  -9   11.66    0.85
   1   1   9   12.20    0.76
  -2  -1  -9    5.48    0.51
  -2  -1  -9    7.55    0.67
   2   1   9    6.44    0.56
  -3  -1  -9    0.07    0.14
  -3  -1  -9    0.30    0.15
   3   1   9    0.03    0.13
  -4  -1  -9    3.09    0.55
  -4  -1  -9    3.50    0.49
   4   1   9    3.81    0.57
  -5  -1  -9    0.03    0.13
  -5  -1  -9    0.01    0.21
   5   1   9   -0.04    0.14
  -6  -1  -9    6.38    0.58
  -6  -1  -9    5.00    0.58
   6   1   9    5.52    0.57
  -7  -1  -9   15.54    1.03
   7   1   9   17.68    1.02
  -8  -1  -9   17.55    1.12
   8   1   9   16.15    1.05
  -9  -1  -9    4.30    0.69
   9   1   9    4.22    0.67
 -10  -1  -9    1.27    0.63
  10   1   9    1.41    0.45
   7  -2  -9    3.01    0.52
   6  -2  -9    1.72    0.51
  -6   2   9    1.75    0.59
   5  -2  -9    0.92    0.36
  -5   2   9    0.47    0.31
   4  -2  -9    1.14    0.27
  -4   2   9    1.07    0.26
   3  -2  -9    0.17    0.22
  -3   2   9    0.65    0.31
   2  -2  -9   -0.30    0.20
   2  -2  -9    1.20    0.22
   1  -2  -9    4.43    0.70
   1  -2  -9    4.62    0.66
  -1   2   9    5.13    0.44
   0  -2  -9   42.64    1.54
   0  -2  -9   41.29    1.69
   0   2   9   44.48    1.41
  -1  -2  -9    0.94    0.26
  -1  -2  -9    0.74    0.31
   1   2   9    1.23    0.28
  -2  -2  -9   31.11    1.40
  -2  -2  -9   30.46    1.27
   2   2   9   29.15    1.13
  -3  -2  -9   59.05    1.97
  -3  -2  -9   60.59    1.87
   3   2   9   59.24    1.71
  -4  -2  -9   15.04    0.91
  -4  -2  -9   14.69    0.87
   4   2   9   14.51    0.84
  -5  -2  -9    2.98    0.47
  -5  -2  -9    3.85    0.59
  -5  -2  -9    3.14    0.51
  -6  -2  -9    9.78    0.74
  -6  -2  -9   10.02    0.74
   6   2   9    8.85    0.71
  -7  -2  -9    2.86    0.55
   7   2   9    3.24    0.60
   7   2   9    3.59    0.50
  -8  -2  -9    3.34    0.63
   8   2   9    3.21    0.61
  -9  -2  -9   15.06    1.11
   9   2   9   15.93    1.10
 -10  -2  -9   17.25    1.22
  10   2   9   17.87    1.19
 -11  -2  -9    0.13    0.38
  11   2   9    0.29    0.33
   7  -3  -9    2.45    0.46
  -6   3   9    0.09    0.29
   5  -3  -9    2.19    0.45
  -5   3   9    1.17    0.40
   4  -3  -9    3.66    0.71
  -4   3   9    3.70    0.74
   3  -3  -9    5.57    0.62
  -3   3   9    3.69    0.63
   2  -3  -9   39.87    1.63
  -2   3   9   43.55    1.81
   1  -3  -9   15.77    0.96
  -1   3   9   16.52    1.07
   0  -3  -9    9.17    0.70
   0   3   9    9.22    0.76
  -1  -3  -9    2.07    0.46
   1   3   9    1.99    0.44
   1   3   9    2.28    0.27
  -2  -3  -9   10.82    0.79
  -2  -3  -9   11.40    0.78
   2   3   9   11.35    0.60
  -3  -3  -9    5.70    0.56
   3   3   9    5.91    0.45
   3   3   9    6.02    0.59
  -4  -3  -9   20.27    1.07
   4   3   9   19.73    0.90
   4   3   9   20.49    1.08
  -5  -3  -9   75.13    1.98
  -5  -3  -9   73.15    2.23
   5   3   9   74.26    2.16
  -6  -3  -9    4.45    0.54
  -6  -3  -9    4.60    0.49
   6   3   9    4.62    0.47
  -7  -3  -9   10.12    0.76
   7   3   9    9.80    0.79
   7   3   9   10.19    0.71
  -8  -3  -9   23.17    1.22
   8   3   9   23.08    1.25
  -9  -3  -9    0.66    0.33
   9   3   9    1.32    0.36
 -10  -3  -9   10.14    0.94
  10   3   9    7.67    0.81
 -11  -3  -9    4.34    0.78
  11   3   9    7.25    0.75
   6  -4  -9    0.67    0.34
  -6   4   9    0.69    0.42
   5  -4  -9    0.48    0.36
  -5   4   9    0.10    0.17
   4  -4  -9    4.18    0.68
  -4   4   9    3.89    0.69
   3  -4  -9    1.67    0.49
  -3   4   9    1.29    0.45
   2  -4  -9    2.48    0.52
  -2   4   9    3.18    0.65
   1  -4  -9   25.85    1.30
  -1   4   9   25.95    1.38
   0  -4  -9    1.41    0.44
   0   4   9    1.46    0.44
  -1  -4  -9    3.07    0.53
   1   4   9    3.42    0.56
  -2  -4  -9    0.69    0.22
   2   4   9    1.20    0.32
  -3  -4  -9   11.56    0.82
   3   4   9   12.37    0.85
   3   4   9   10.92    0.54
  -4  -4  -9   10.60    0.80
  -4  -4  -9   10.75    0.59
   4   4   9   10.05    0.75
  -5  -4  -9    0.39    0.25
  -5  -4  -9    0.24    0.18
   5   4   9    0.21    0.27
  -6  -4  -9   53.78    1.96
  -6  -4  -9   56.52    1.70
   6   4   9   54.12    1.75
  -7  -4  -9    3.20    0.54
  -7  -4  -9    1.93    0.40
   7   4   9    3.17    0.49
  -8  -4  -9    5.25    0.59
   8   4   9    6.03    0.65
  -9  -4  -9   38.75    1.68
   9   4   9   40.20    1.79
 -10  -4  -9    4.33    0.70
  10   4   9    5.40    0.86
 -11  -4  -9    1.61    0.51
  11   4   9    1.83    0.51
 -12  -4  -9    4.00    0.75
  12   4   9    4.60    0.84
   6  -5  -9    6.34    0.94
  -6   5   9    5.43    0.90
   5  -5  -9    6.66    1.04
  -5   5   9    5.18    0.85
   4  -5  -9    9.29    0.86
  -4   5   9    7.68    0.83
   3  -5  -9    7.78    0.79
  -3   5   9    7.64    0.73
   2  -5  -9   -0.19    0.12
   1  -5  -9    1.33    0.34
  -1   5   9    0.88    0.35
   0  -5  -9    0.73    0.31
   0   5   9    0.69    0.29
  -1  -5  -9    5.58    0.61
   1   5   9    5.59    0.62
  -2  -5  -9    7.11    0.66
   2   5   9    6.89    0.67
  -3  -5  -9    7.69    0.69
   3   5   9    7.27    0.68
  -4  -5  -9   70.54    2.27
   4   5   9   69.47    2.14
  -5  -5  -9   69.90    1.72
  -5  -5  -9   69.22    2.25
   5   5   9   70.05    2.10
  -6  -5  -9    0.41    0.19
  -6  -5  -9    0.93    0.26
   6   5   9    0.64    0.21
  -7  -5  -9    2.13    0.43
  -7  -5  -9    2.17    0.50
   7   5   9    2.35    0.40
  -8  -5  -9    9.98    0.76
   8   5   9   11.38    0.91
  -9  -5  -9    1.70    0.39
   9   5   9    1.92    0.49
 -10  -5  -9    0.16    0.24
  10   5   9    0.14    0.31
 -11  -5  -9    7.85    0.87
  11   5   9    8.99    0.97
 -12  -5  -9    2.39    0.57
  12   5   9    2.26    0.66
   6  -6  -9    1.85    0.46
  -6   6   9    1.27    0.51
   5  -6  -9    3.75    0.80
  -5   6   9    4.14    0.74
   4  -6  -9    0.50    0.21
  -4   6   9   -0.40    0.23
   3  -6  -9    0.59    0.35
  -3   6   9    0.57    0.42
   2  -6  -9   18.46    1.21
  -2   6   9   18.94    1.19
   1  -6  -9    8.31    0.74
  -1   6   9    7.72    0.72
   0  -6  -9    8.77    0.79
   0   6   9    8.37    0.75
  -1  -6  -9    5.79    0.66
   1   6   9    5.95    0.60
  -2  -6  -9   -0.20    0.17
   2   6   9    0.38    0.14
  -3  -6  -9    9.69    0.80
   3   6   9   11.09    0.81
  -4  -6  -9    8.59    0.79
   4   6   9    8.45    0.70
  -5  -6  -9   26.36    1.37
   5   6   9   27.40    1.26
  -6  -6  -9    3.95    0.52
  -6  -6  -9    2.96    0.59
   6   6   9    3.66    0.56
  -7  -6  -9    8.01    0.62
  -7  -6  -9    8.96    0.82
   7   6   9    8.15    0.63
  -8  -6  -9    1.66    0.39
  -8  -6  -9    1.53    0.31
  -9  -6  -9   -0.08    0.21
   9   6   9    0.43    0.27
 -10  -6  -9    0.39    0.20
  10   6   9   -0.27    0.12
 -11  -6  -9    6.15    0.72
  11   6   9    5.56    0.93
 -12  -6  -9    5.80    0.91
  12   6   9    5.78    0.94
   5  -7  -9    0.02    0.40
  -5   7   9    1.09    0.40
   4  -7  -9    1.32    0.36
  -4   7   9    1.15    0.35
   3  -7  -9    2.32    0.60
  -3   7   9    2.06    0.47
   2  -7  -9    4.09    0.77
  -2   7   9    2.82    0.58
   1  -7  -9    6.05    0.65
  -1   7   9    3.82    0.69
   0  -7  -9    2.58    0.55
   0   7   9    2.13    0.55
  -1  -7  -9    8.06    0.79
   1   7   9    8.06    0.75
  -2  -7  -9    1.46    0.47
   2   7   9    0.67    0.31
  -3  -7  -9    7.51    0.74
   3   7   9    6.70    0.66
  -4  -7  -9    6.60    0.68
   4   7   9    6.99    0.64
  -5  -7  -9    8.16    0.80
   5   7   9    7.39    0.65
  -6  -7  -9    1.04    0.44
   6   7   9    1.56    0.36
  -7  -7  -9   12.94    1.00
   7   7   9   13.32    0.83
  -8  -7  -9    6.32    0.56
  -8  -7  -9    6.97    0.71
  -9  -7  -9    2.51    0.49
   9   7   9    3.18    0.67
 -10  -7  -9   13.57    0.99
  10   7   9   14.84    1.18
 -11  -7  -9    2.93    0.69
  11   7   9    4.60    0.80
 -12  -7  -9    1.69    0.50
  12   7   9    2.02    0.64
   5  -8  -9    9.23    1.02
  -5   8   9    8.42    0.90
   4  -8  -9    8.34    0.85
  -4   8   9    7.49    0.85
   3  -8  -9    6.57    0.74
  -3   8   9    4.90    0.79
   2  -8  -9    2.34    0.60
  -2   8   9    2.65    0.59
   1  -8  -9    3.08    0.66
  -1   8   9    3.62    0.61
   0  -8  -9    2.69    0.59
   0   8   9    4.76    0.56
  -1  -8  -9    5.66    0.85
   1   8   9    5.31    0.78
  -2  -8  -9    2.47    0.56
   2   8   9    3.13    0.58
  -3  -8  -9    0.47    0.25
   3   8   9    0.50    0.29
  -4  -8  -9    6.90    0.74
   4   8   9    6.94    0.69
  -5  -8  -9    5.44    0.84
   5   8   9    5.29    0.60
  -6  -8  -9   26.11    1.43
   6   8   9   24.50    1.23
  -7  -8  -9    2.05    0.43
   7   8   9    0.87    0.33
  -8  -8  -9   18.98    1.29
  -9  -8  -9   12.79    1.10
 -10  -8  -9    1.98    0.51
  10   8   9    0.85    0.38
 -11  -8  -9    3.46    0.61
  11   8   9    2.68    0.73
   4  -9  -9    0.11    0.36
  -4   9   9    0.20    0.41
   3  -9  -9    0.70    0.44
  -3   9   9    0.08    0.26
   2  -9  -9    5.66    0.88
  -2   9   9    4.94    0.83
   1  -9  -9    1.27    0.37
  -1   9   9    1.17    0.49
   0  -9  -9    7.83    0.83
   0   9   9    8.35    0.85
  -1  -9  -9    0.11    0.28
   1   9   9    0.10    0.30
  -2  -9  -9    0.00    0.25
   2   9   9    0.85    0.31
  -3  -9  -9    6.10    0.87
   3   9   9    5.34    0.63
  -4  -9  -9   12.05    0.99
   4   9   9   11.98    0.90
  -5  -9  -9    1.49    0.51
   5   9   9    1.35    0.44
  -6  -9  -9    3.07    0.63
   6   9   9    2.52    0.49
  -7  -9  -9   18.71    1.26
   7   9   9   20.67    1.10
  -8  -9  -9    2.83    0.70
   8   9   9    2.65    0.55
  -9  -9  -9   18.92    1.32
  10   9   9    6.66    0.78
  11   9   9    0.42    0.29
  -3  10   9    1.70    0.60
   2 -10  -9    6.25    0.71
  -2  10   9    5.42    0.94
   1 -10  -9    1.23    0.42
  -1  10   9   -0.35    0.26
   0 -10  -9    0.19    0.31
   0  10   9   -0.16    0.24
  -1 -10  -9    4.93    0.86
   1  10   9    6.12    0.73
  -2 -10  -9    8.68    0.91
   2  10   9    7.72    0.84
  -3 -10  -9    4.42    0.78
   3  10   9    3.80    0.73
  -4 -10  -9    8.10    0.82
   4  10   9    6.64    0.72
  -5 -10  -9    4.35    0.81
   5  10   9    4.04    0.65
  -6 -10  -9    0.97    0.32
   6  10   9    0.97    0.30
  -7 -10  -9    4.78    0.79
   7  10   9    4.72    0.70
  -8 -10  -9   32.62    1.79
   8  10   9   31.63    1.42
  -9 -10  -9    4.57    0.75
  10  10   9    3.68    0.73
   2 -11  -9    1.64    0.64
  -2  11   9    1.05    0.42
   1 -11  -9    0.67    0.41
  -1  11   9    1.57    0.40
   0 -11  -9    4.17    0.81
   0  11   9    4.40    0.82
  -1 -11  -9    3.38    0.68
   1  11   9    2.74    0.61
  -2 -11  -9    1.88    0.50
   2  11   9    2.01    0.49
  -3 -11  -9    3.07    0.65
   3  11   9    3.67    0.69
  -4 -11  -9    0.30    0.35
   4  11   9    0.00    0.26
  -5 -11  -9    7.69    1.10
   5  11   9    8.99    0.81
  -6 -11  -9    6.29    0.72
   6  11   9    7.35    0.73
  -7 -11  -9    6.85    1.04
   7  11   9    8.11    0.73
  -8 -11  -9    0.37    0.40
   8  11   9    0.53    0.36
  -9 -11  -9    0.04    0.25
  10  11   9    1.96    0.60
   0 -12  -9   13.53    1.18
   0  12   9   11.04    1.06
  -1 -12  -9    1.11    0.58
   1  12   9    1.77    0.61
  -2 -12  -9    0.08    0.28
   2  12   9    0.01    0.21
  -3 -12  -9    3.62    0.73
   3  12   9    3.48    0.67
  -4 -12  -9    0.86    0.33
   4  12   9    0.79    0.39
  -5 -12  -9    0.89    0.45
   5  12   9    1.80    0.47
  -6 -12  -9    0.77    0.37
   6  12   9    0.73    0.46
  -7 -12  -9    1.04    0.40
   7  12   9    0.89    0.44
  -8 -12  -9    3.00    0.77
   8  12   9    3.65    0.60
  -9 -12  -9    3.29    0.75
  -2 -13  -9   -0.15    0.24
   2  13   9    0.04    0.18
  -3 -13  -9    1.37    0.57
   3  13   9    2.69    0.63
  -4 -13  -9    3.36    0.79
   4  13   9    3.30    0.68
  -5 -13  -9    1.31    0.50
   5  13   9    1.05    0.49
  -6 -13  -9    0.15    0.27
   6  13   9   -0.01    0.36
   2   3 -10   11.07    1.05
  -2  -3  10   11.68    1.04
   1   3 -10    2.93    0.66
  -1  -3  10    4.27    0.78
   0   3 -10    0.73    0.44
   0  -3  10    1.18    0.46
  -1   3 -10    8.22    0.91
   1  -3  10    8.65    0.90
  -2   3 -10    0.58    0.40
   2  -3  10    0.61    0.37
  -3   3 -10    4.94    0.78
   3  -3  10    4.92    0.83
  -4   3 -10   14.50    1.13
   4  -3  10   12.88    1.14
  -5   3 -10    0.04    0.28
   5  -3  10    0.31    0.43
   3   2 -10   -0.01    0.29
  -3  -2  10   -0.11    0.33
   2   2 -10    0.37    0.41
  -2  -2  10    1.01    0.47
   1   2 -10    9.34    0.90
  -1  -2  10    7.12    0.75
   0   2 -10    3.57    0.80
   0  -2  10    3.18    0.61
  -1   2 -10    6.19    0.73
   1  -2  10    5.44    0.85
  -2   2 -10   16.70    1.21
   2  -2  10   16.16    1.18
  -3   2 -10    3.35    0.71
   3  -2  10    4.68    0.80
  -4   2 -10    0.65    0.26
   4  -2  10    0.83    0.34
  -5   2 -10    0.98    0.32
   5  -2  10    0.87    0.34
  -6   2 -10    0.66    0.46
   6  -2  10    1.62    0.45
   7  -2  10    4.87    0.82
   4   1 -10    4.88    0.92
   3   1 -10    5.46    0.84
  -3  -1  10    6.22    0.70
   2   1 -10   -0.21    0.31
  -2  -1  10    0.44    0.23
   1   1 -10    0.52    0.48
  -1  -1  10    0.77    0.34
   0   1 -10    5.43    0.83
   0  -1  10    5.68    0.67
  -1   1 -10    5.86    0.68
   1  -1  10    6.52    0.70
  -2   1 -10    0.62    0.32
   2  -1  10    0.42    0.21
  -3   1 -10   15.11    1.12
   3  -1  10   13.30    1.00
  -4   1 -10   19.79    1.23
   4  -1  10   19.55    1.21
  -5   1 -10    4.14    0.63
   5  -1  10    4.73    0.72
  -6   1 -10   12.02    1.02
   6  -1  10   12.74    1.03
   7  -1  10   28.00    1.64
   8  -1  10    5.26    0.89
   5   0 -10    0.83    0.42
   4   0 -10    0.96    0.29
   3   0 -10   -0.38    0.24
   2   0 -10    4.67    0.72
  -2   0  10    4.43    0.65
   1   0 -10    0.29    0.18
  -1   0  10   -0.14    0.23
   0   0 -10    1.39    0.48
   0   0  10    1.83    0.42
  -1   0 -10    7.26    0.79
   1   0  10    6.69    0.65
  -2   0 -10   16.33    1.16
   2   0  10   18.91    1.10
  -3   0 -10   10.96    0.93
   3   0  10   13.55    0.95
  -4   0 -10    3.78    0.70
   4   0  10    4.21    0.51
  -5   0 -10    3.86    0.63
   5   0  10    3.36    0.64
  -6   0 -10    2.31    0.53
   6   0  10    2.86    0.58
  -8   0 -10   24.71    1.42
  -9   0 -10    3.44    0.72
  -5   1  10    7.23    0.85
   4  -1 -10    1.13    0.40
   3  -1 -10    0.07    0.24
   2  -1 -10    0.47    0.29
   1  -1 -10   -0.42    0.15
  -1   1  10    0.00    0.22
   0  -1 -10   10.20    0.90
   0   1  10   10.63    0.77
  -1  -1 -10    0.26    0.22
   1   1  10   -0.06    0.14
  -2  -1 -10   12.97    1.00
   2   1  10   13.25    0.86
  -3  -1 -10   39.03    1.72
   3   1  10   41.01    1.56
  -4  -1 -10    1.91    0.49
  -4  -1 -10    3.01    0.56
   4   1  10    3.02    0.51
  -5  -1 -10    2.37    0.50
   5   1  10    3.29    0.53
   5   1  10    3.12    0.55
  -6  -1 -10    6.92    0.74
   6   1  10    7.90    0.75
   6   1  10    7.63    0.65
  -7  -1 -10    1.62    0.40
   7   1  10    1.71    0.44
  -8  -1 -10    2.05    0.58
   8   1  10    2.88    0.55
  -9  -1 -10    2.48    0.66
   9   1  10    3.23    0.60
 -10  -1 -10    4.40    0.76
  10   1  10    4.27    0.69
  -5   2  10    1.77    0.67
   4  -2 -10    0.29    0.29
  -4   2  10    0.87    0.39
   3  -2 -10   18.96    1.14
  -3   2  10   16.95    1.22
   2  -2 -10   11.53    0.84
   2  -2 -10   11.28    0.96
   1  -2 -10   42.80    1.65
   1  -2 -10   42.64    1.89
   0  -2 -10    9.77    0.86
   0  -2 -10   10.65    0.80
  -1  -2 -10    3.33    0.59
  -1  -2 -10    3.72    0.59
   1   2  10    3.54    0.48
  -2  -2 -10    7.28    0.66
  -2  -2 -10    7.96    0.74
   2   2  10    7.75    0.60
  -3  -2 -10    0.30    0.17
  -3  -2 -10    0.32    0.18
   3   2  10    0.28    0.16
  -4  -2 -10    0.31    0.20
  -4  -2 -10    0.25    0.21
   4   2  10    0.04    0.13
  -5  -2 -10    6.25    0.59
  -5  -2 -10    5.10    0.61
   5   2  10    5.40    0.59
  -6  -2 -10    2.13    0.47
  -6  -2 -10    2.58    0.46
   6   2  10    2.57    0.47
  -7  -2 -10   16.45    1.02
   7   2  10   16.01    1.03
   7   2  10   16.15    0.99
  -8  -2 -10    8.73    0.78
   8   2  10    8.88    0.80
  -9  -2 -10   -0.26    0.23
   9   2  10    0.60    0.22
 -10  -2 -10    4.43    0.79
  10   2  10    3.87    0.68
   6  -3 -10    1.83    0.40
  -6   3  10    0.28    0.41
   5  -3 -10    0.58    0.30
  -5   3  10    1.69    0.36
   4  -3 -10    4.72    0.72
  -4   3  10    3.91    0.75
   3  -3 -10    8.22    0.75
  -3   3  10    8.54    0.91
   2  -3 -10    1.12    0.38
  -2   3  10    1.27    0.33
   1  -3 -10   10.39    0.86
  -1   3  10    8.37    0.82
   0  -3 -10    3.44    0.54
   0   3  10    3.75    0.64
  -1  -3 -10    1.48    0.42
   1   3  10    1.75    0.48
  -2  -3 -10   11.57    0.85
   2   3  10   11.28    0.89
  -3  -3 -10    5.05    0.59
   3   3  10    5.43    0.45
   3   3  10    4.72    0.70
  -4  -3 -10    0.83    0.37
   4   3  10    1.26    0.31
   4   3  10    1.56    0.38
  -5  -3 -10    8.74    0.74
   5   3  10    7.66    0.70
  -6  -3 -10    5.51    0.56
  -6  -3 -10    5.47    0.63
   6   3  10    5.33    0.53
  -7  -3 -10    7.41    0.67
   7   3  10    6.83    0.64
   7   3  10    6.80    0.69
  -8  -3 -10   15.61    1.03
   8   3  10   15.81    1.07
  -9  -3 -10    8.73    0.83
   9   3  10    9.83    0.88
 -10  -3 -10    2.01    0.55
  10   3  10    1.74    0.48
 -11  -3 -10    7.66    0.90
  11   3  10    9.17    0.91
   5  -4 -10    2.44    0.49
  -5   4  10    1.08    0.61
   4  -4 -10    5.63    0.88
  -4   4  10    5.60    0.90
   3  -4 -10    9.03    0.85
  -3   4  10    7.56    0.84
   2  -4 -10   14.00    0.99
  -2   4  10   15.22    1.18
   1  -4 -10   10.75    0.83
  -1   4  10   10.76    0.96
   0  -4 -10    0.14    0.29
   0   4  10    0.55    0.31
  -1  -4 -10    3.57    0.63
   1   4  10    2.78    0.54
  -2  -4 -10    2.80    0.51
   2   4  10    3.07    0.56
  -3  -4 -10    2.98    0.57
   3   4  10    2.99    0.54
  -4  -4 -10   42.75    1.71
   4   4  10   39.65    1.50
   4   4  10   37.75    1.61
  -5  -4 -10   27.42    1.36
  -5  -4 -10   28.62    1.09
   5   4  10   27.36    1.33
  -6  -4 -10    5.22    0.75
  -6  -4 -10    4.32    0.58
   6   4  10    4.71    0.67
  -7  -4 -10   38.57    1.49
  -7  -4 -10   42.27    1.78
   7   4  10   40.48    1.54
  -8  -4 -10    0.19    0.30
   8   4  10    0.11    0.22
  -9  -4 -10    1.10    0.37
   9   4  10    0.87    0.32
 -10  -4 -10    7.44    0.81
  10   4  10    7.72    0.84
 -11  -4 -10   13.19    1.13
  11   4  10   12.27    1.11
   5  -5 -10    1.04    0.39
  -5   5  10    1.24    0.41
  -4   5  10    2.33    0.49
   3  -5 -10    2.10    0.60
  -3   5  10    0.95    0.45
   2  -5 -10    2.86    0.52
  -2   5  10    2.70    0.62
   1  -5 -10    7.70    0.79
  -1   5  10    6.51    0.77
   0  -5 -10    1.93    0.48
   0   5  10    2.17    0.52
  -1  -5 -10    0.78    0.22
   1   5  10    0.71    0.27
  -2  -5 -10    1.11    0.34
   2   5  10    0.37    0.23
  -3  -5 -10    6.24    0.74
   3   5  10    5.79    0.62
  -4  -5 -10    0.18    0.23
   4   5  10    0.61    0.17
  -5  -5 -10    2.51    0.47
   5   5  10    3.23    0.58
  -6  -5 -10   40.78    1.76
   6   5  10   40.77    1.60
  -7  -5 -10    5.80    0.56
  -7  -5 -10    6.28    0.74
   7   5  10    6.49    0.59
  -8  -5 -10    1.27    0.43
  -8  -5 -10    1.03    0.50
  -9  -5 -10   11.22    0.88
   9   5  10   11.06    0.98
  10   5  10   -0.44    0.32
 -11  -5 -10    7.29    1.09
  11   5  10    5.55    0.97
   5  -6 -10    1.71    0.54
  -5   6  10    1.38    0.42
   4  -6 -10    4.77    0.84
  -4   6  10    2.37    0.64
   3  -6 -10    0.65    0.42
  -3   6  10    0.64    0.38
   2  -6 -10    1.79    0.36
  -2   6  10    0.84    0.38
   1  -6 -10    1.04    0.44
  -1   6  10    1.69    0.41
   0  -6 -10    1.12    0.44
   0   6  10    0.74    0.23
  -1  -6 -10    0.77    0.30
   1   6  10    0.64    0.32
  -2  -6 -10    0.41    0.32
   2   6  10    0.18    0.23
  -3  -6 -10   28.09    1.45
   3   6  10   27.80    1.40
  -4  -6 -10    1.99    0.54
   4   6  10    2.24    0.51
  -5  -6 -10    4.95    0.59
   5   6  10    4.91    0.68
  -6  -6 -10   15.15    1.06
   6   6  10   11.55    0.84
  -7  -6 -10    6.86    0.79
   7   6  10    6.60    0.65
  -8  -6 -10   31.16    1.64
  -9  -6 -10    1.05    0.29
   9   6  10    0.47    0.36
 -10  -6 -10   17.87    1.16
  10   6  10   18.81    1.32
 -11  -6 -10    7.64    0.86
  11   6  10    9.01    0.96
   5  -7 -10    5.24    0.95
  -5   7  10    7.03    1.01
   4  -7 -10    1.69    0.45
  -4   7  10    0.78    0.33
   3  -7 -10    2.78    0.73
  -3   7  10    3.16    0.65
   2  -7 -10   33.10    1.70
  -2   7  10   32.56    1.72
   1  -7 -10    1.44    0.50
  -1   7  10    1.08    0.44
   0  -7 -10    2.89    0.68
   0   7  10    2.43    0.63
  -1  -7 -10    2.89    0.58
   1   7  10    2.67    0.56
  -2  -7 -10   19.84    1.26
   2   7  10   18.20    1.17
  -3  -7 -10    1.03    0.43
   3   7  10    0.91    0.31
  -4  -7 -10    0.86    0.46
   4   7  10    0.86    0.27
  -5  -7 -10   15.76    1.12
   5   7  10   15.45    1.03
  -6  -7 -10    3.17    0.61
   6   7  10    3.02    0.51
  -7  -7 -10    4.67    0.78
   7   7  10    5.27    0.57
  -8  -7 -10    1.50    0.55
  -9  -7 -10    0.37    0.36
  10   7  10    1.04    0.33
 -11  -7 -10    3.22    0.76
  11   7  10    4.77    0.86
   4  -8 -10    6.63    0.79
  -4   8  10    4.56    0.75
   3  -8 -10    3.38    0.78
  -3   8  10    4.30    0.73
   2  -8 -10    2.57    0.53
  -2   8  10    1.55    0.52
   1  -8 -10    8.00    0.83
  -1   8  10    7.70    0.76
   0  -8 -10    7.56    1.05
   0   8  10    8.51    0.83
  -1  -8 -10    0.32    0.27
   1   8  10    0.24    0.28
  -2  -8 -10    8.14    0.84
   2   8  10    9.15    0.85
  -3  -8 -10    1.16    0.43
   3   8  10    1.92    0.51
  -4  -8 -10    0.56    0.41
   4   8  10    0.97    0.32
  -5  -8 -10    1.00    0.45
   5   8  10    0.84    0.24
  -6  -8 -10    9.93    0.89
   6   8  10   10.08    0.81
  -7  -8 -10    7.22    0.80
   7   8  10    7.87    0.70
  -8  -8 -10    0.02    0.38
  -9  -8 -10    7.71    0.89
  10   8  10    2.68    0.62
  11   8  10    2.48    0.67
   3  -9 -10    8.97    0.99
  -3   9  10    9.31    0.97
   2  -9 -10    0.75    0.38
  -2   9  10    0.22    0.26
   1  -9 -10    1.73    0.60
  -1   9  10    1.58    0.57
   0  -9 -10    0.37    0.36
   0   9  10    1.59    0.47
  -1  -9 -10   13.17    1.06
   1   9  10   14.56    1.12
  -2  -9 -10    5.35    0.90
   2   9  10    6.22    0.70
  -3  -9 -10    0.15    0.33
   3   9  10    0.60    0.27
  -4  -9 -10    8.78    0.90
   4   9  10    9.28    0.85
  -5  -9 -10    0.55    0.24
   5   9  10    0.18    0.23
  -6  -9 -10    2.40    0.56
   6   9  10    1.43    0.39
  -7  -9 -10    5.87    0.93
   7   9  10    5.50    0.78
  -8  -9 -10   15.06    1.21
  -9  -9 -10    4.85    0.79
  10   9  10    2.31    0.64
  11   9  10    4.43    0.93
   2 -10 -10    0.83    0.46
  -2  10  10   -0.27    0.37
   1 -10 -10   -0.25    0.26
  -1  10  10    1.68    0.34
   0 -10 -10    0.70    0.24
   0  10  10    0.95    0.29
  -1 -10 -10    1.18    0.37
   1  10  10    1.49    0.49
  -2 -10 -10    4.83    0.88
   2  10  10    6.29    0.74
  -3 -10 -10    6.06    0.99
   3  10  10    7.39    0.73
  -4 -10 -10    0.75    0.43
   4  10  10    1.11    0.31
  -5 -10 -10    4.81    0.83
   5  10  10    4.73    0.80
  -6 -10 -10    1.94    0.55
   6  10  10    1.55    0.43
  -7 -10 -10    3.80    0.80
   7  10  10    4.12    0.63
  -8 -10 -10    3.58    0.75
   8  10  10    4.52    0.82
  -9 -10 -10    0.67    0.39
  10  10  10    0.65    0.51
   0 -11 -10   11.30    1.05
   0  11  10    9.91    1.06
  -1 -11 -10   11.33    1.02
   1  11  10    8.09    0.93
  -2 -11 -10    3.58    0.79
   2  11  10    3.02    0.74
  -3 -11 -10    2.33    0.68
   3  11  10    1.53    0.58
  -4 -11 -10    0.23    0.16
   4  11  10    0.47    0.28
  -5 -11 -10    1.42    0.43
   5  11  10    1.04    0.35
  -6 -11 -10    0.20    0.37
   6  11  10    0.97    0.26
  -7 -11 -10   12.01    1.08
   7  11  10   11.52    0.95
  -8 -11 -10    2.71    0.67
   8  11  10    3.67    0.70
  -9 -11 -10    0.51    0.42
   0 -12 -10   -0.11    0.36
  -1 -12 -10    6.41    1.05
   1  12  10    8.04    0.90
  -2 -12 -10    1.50    0.43
   2  12  10    1.61    0.33
  -3 -12 -10    0.72    0.29
   3  12  10    0.96    0.44
  -4 -12 -10    0.88    0.46
   4  12  10    0.72    0.40
  -5 -12 -10   -0.18    0.43
   5  12  10    0.38    0.23
  -6 -12 -10    5.69    0.67
   6  12  10    3.62    0.66
   7  12  10    1.83    0.31
  -8 -12 -10    1.17    0.38
   8  12  10    0.17    0.43
  -4 -13 -10    3.56    0.79
   4  13  10    3.50    0.79
  -5 -13 -10    0.67    0.38
   5  13  10    1.71    0.33
   1   2 -11    1.16    0.51
  -1  -2  11    3.15    0.72
   0   2 -11    1.80    0.56
   0  -2  11    2.76    0.58
  -1   2 -11    6.80    0.76
   1  -2  11    4.13    0.74
  -2   2 -11    0.96    0.50
   2  -2  11    1.60    0.51
  -3   2 -11    3.37    0.64
   3  -2  11    4.73    0.86
  -4   2 -11    6.11    0.91
   4  -2  11    4.81    0.89
   2   1 -11    0.30    0.41
   1   1 -11    2.35    0.68
  -1  -1  11    2.30    0.62
   0   1 -11    1.81    0.57
   0  -1  11    1.67    0.49
  -1   1 -11   11.72    1.15
   1  -1  11   10.52    0.95
  -2   1 -11   11.77    1.12
   2  -1  11   14.19    1.07
  -3   1 -11    1.63    0.58
   3  -1  11    3.32    0.64
  -4   1 -11    0.16    0.35
  -5   1 -11    2.21    0.61
   5  -1  11    3.01    0.60
  -6   1 -11    1.08    0.54
   6  -1  11    1.72    0.49
   3   0 -11   -0.17    0.33
   1   0 -11    2.90    0.58
   0   0 -11    1.55    0.50
   0   0  11    1.59    0.63
  -1   0 -11    5.38    0.83
   1   0  11    6.36    0.68
  -2   0 -11    8.82    0.92
   2   0  11    8.12    0.76
  -3   0 -11    7.89    0.86
   3   0  11    8.01    0.78
  -4   0 -11    0.11    0.18
   4   0  11    0.15    0.26
  -5   0 -11   10.53    0.98
   5   0  11   11.84    0.92
  -6   0 -11    1.28    0.41
   6   0  11    1.04    0.46
   7   0  11    2.82    0.62
   8   0  11    4.74    0.90
  -4   1  11    0.91    0.47
   3  -1 -11   -0.07    0.28
   2  -1 -11    3.48    0.75
   1  -1 -11    0.56    0.27
   0  -1 -11   -0.26    0.28
  -1  -1 -11   13.73    1.14
  -2  -1 -11    0.02    0.32
   2   1  11    1.20    0.33
  -3  -1 -11    0.09    0.23
   3   1  11    0.30    0.24
  -4  -1 -11    6.22    0.88
   4   1  11    6.56    0.66
  -5  -1 -11   12.12    1.00
   5   1  11   13.21    0.93
  -6  -1 -11    0.37    0.28
   6   1  11    0.33    0.27
   7   1  11    7.59    0.88
  -8  -1 -11    8.32    0.92
  -4   2  11   -0.27    0.31
  -3   2  11    0.11    0.23
  -2   2  11   -0.04    0.33
   1  -2 -11    3.76    0.77
   0  -2 -11    0.95    0.31
  -1  -2 -11   37.68    1.80
  -2  -2 -11    2.79    0.57
  -3  -2 -11    0.15    0.31
  -3  -2 -11    0.23    0.25
   3   2  11    0.20    0.21
  -4  -2 -11    0.04    0.25
  -4  -2 -11   -0.17    0.29
   4   2  11    0.10    0.19
  -5  -2 -11    0.49    0.25
  -5  -2 -11    0.48    0.24
   5   2  11   -0.02    0.16
  -6  -2 -11   12.65    0.99
   6   2  11   13.17    0.94
   6   2  11   12.03    0.90
  -7  -2 -11    2.62    0.54
   7   2  11    3.54    0.56
  -8  -2 -11    2.25    0.50
   8   2  11    2.62    0.51
  -9  -2 -11    9.75    0.91
   9   2  11    8.91    0.88
   4  -3 -11   12.87    1.03
  -4   3  11   12.08    1.18
   3  -3 -11   30.61    1.60
  -3   3  11   31.93    1.83
   2  -3 -11   -0.31    0.32
  -2   3  11    0.65    0.25
   1  -3 -11    3.03    0.58
  -1   3  11    3.09    0.66
   0  -3 -11   26.07    1.38
   0   3  11   27.69    1.57
  -1  -3 -11    1.09    0.38
   1   3  11    1.40    0.42
  -2  -3 -11    2.34    0.50
   2   3  11    1.91    0.46
  -3  -3 -11    5.74    0.63
   3   3  11    4.83    0.73
  -4  -3 -11   16.17    1.04
   4   3  11   17.39    1.12
  -5  -3 -11    2.64    0.50
   5   3  11    2.90    0.49
   5   3  11    2.28    0.52
  -6  -3 -11    0.05    0.27
   6   3  11    0.11    0.16
   6   3  11    0.40    0.16
  -7  -3 -11   10.79    0.84
   7   3  11   11.11    0.93
   7   3  11   11.01    0.87
  -8  -3 -11    0.33    0.28
   8   3  11   -0.23    0.20
  -9  -3 -11    4.04    0.64
   9   3  11    3.29    0.64
 -10  -3 -11   12.11    1.07
  10   3  11   13.74    1.10
   4  -4 -11   17.13    1.20
  -4   4  11   16.38    1.31
   3  -4 -11    0.71    0.46
  -3   4  11    1.08    0.34
   2  -4 -11   13.47    1.04
  -2   4  11   13.38    1.22
   1  -4 -11    5.87    0.66
  -1   4  11    4.58    0.83
   0  -4 -11    1.68    0.40
   0   4  11    0.16    0.26
  -1  -4 -11    0.18    0.25
   1   4  11    0.30    0.27
  -2  -4 -11   -0.27    0.17
   2   4  11   -0.09    0.21
  -3  -4 -11    0.30    0.35
   3   4  11    0.44    0.34
  -4  -4 -11    0.43    0.32
   4   4  11    0.99    0.40
  -5  -4 -11   24.97    1.33
   5   4  11   23.86    1.33
  -6  -4 -11   14.56    1.07
   6   4  11   14.92    1.01
  -7  -4 -11    2.31    0.59
  -7  -4 -11    2.48    0.49
   7   4  11    2.80    0.52
  -8  -4 -11    2.45    0.51
   8   4  11    2.15    0.49
  -9  -4 -11    0.79    0.32
   9   4  11    1.65    0.33
 -10  -4 -11    0.84    0.37
  10   4  11    1.13    0.41
   4  -5 -11    4.26    0.79
  -4   5  11    2.88    0.71
   3  -5 -11    0.80    0.24
  -3   5  11    0.96    0.53
  -2   5  11    1.69    0.49
   1  -5 -11    6.86    0.96
  -1   5  11    7.19    0.86
   0  -5 -11    9.23    0.86
   0   5  11    8.77    0.88
  -1  -5 -11    0.59    0.28
   1   5  11    1.53    0.40
  -2  -5 -11    0.74    0.40
   2   5  11    1.37    0.38
  -3  -5 -11    8.18    0.81
   3   5  11    7.43    0.73
  -4  -5 -11    2.80    0.59
   4   5  11    3.04    0.54
  -5  -5 -11   -0.17    0.18
   5   5  11    0.13    0.21
  -6  -5 -11   27.50    1.47
   6   5  11   28.57    1.40
  -7  -5 -11    0.00    0.33
   7   5  11   -0.03    0.18
  -8  -5 -11    4.06    0.79
   9   5  11    2.81    0.66
 -10  -5 -11    7.59    0.85
  10   5  11    7.61    0.92
   4  -6 -11    0.13    0.25
  -4   6  11   -0.50    0.30
   3  -6 -11    2.29    0.62
  -3   6  11    2.77    0.63
   2  -6 -11    1.97    0.52
  -2   6  11    3.16    0.71
   1  -6 -11    2.40    0.64
  -1   6  11    1.78    0.43
   0  -6 -11    1.33    0.42
   0   6  11    0.33    0.27
  -1  -6 -11    0.15    0.26
   1   6  11    0.89    0.44
  -2  -6 -11    8.01    0.82
   2   6  11    7.68    0.83
  -3  -6 -11   -0.38    0.26
   3   6  11    0.52    0.39
  -4  -6 -11    4.30    0.71
   4   6  11    4.91    0.78
  -5  -6 -11    5.62    0.66
   5   6  11    4.30    0.68
  -6  -6 -11    0.23    0.31
   6   6  11    0.15    0.17
  -7  -6 -11    2.38    0.62
   7   6  11    3.28    0.57
  -8  -6 -11    3.53    0.72
   9   6  11    2.09    0.59
  10   6  11    1.79    0.55
  11   6  11   13.45    1.14
   4  -7 -11    3.48    0.66
  -4   7  11    1.46    0.51
   3  -7 -11    3.06    0.70
  -3   7  11    2.50    0.76
   2  -7 -11    7.98    0.87
  -2   7  11    7.43    0.84
   1  -7 -11    4.29    0.82
  -1   7  11    4.68    0.90
   0  -7 -11    0.55    0.22
   0   7  11    0.00    0.27
  -1  -7 -11    1.24    0.33
   1   7  11    0.52    0.18
  -2  -7 -11    1.82    0.57
   2   7  11    2.47    0.51
  -3  -7 -11    3.28    0.65
   3   7  11    2.88    0.57
  -4  -7 -11    6.21    0.71
   4   7  11    6.91    0.73
  -5  -7 -11   17.14    1.19
   5   7  11   15.64    1.10
  -6  -7 -11    0.71    0.45
   6   7  11    1.51    0.51
  -7  -7 -11   12.68    1.06
   7   7  11   11.52    0.85
  -8  -7 -11    0.27    0.29
  -9  -7 -11    9.64    0.95
  10   7  11   11.01    1.05
   3  -8 -11    3.21    0.71
  -3   8  11    2.49    0.61
   2  -8 -11   -0.17    0.18
  -2   8  11    0.11    0.40
   1  -8 -11    8.52    0.93
   0  -8 -11   13.84    1.12
   0   8  11   11.74    1.02
  -1  -8 -11   16.78    1.20
   1   8  11   16.25    1.20
  -2  -8 -11   -0.07    0.27
   2   8  11    0.01    0.25
  -3  -8 -11    5.35    0.92
   3   8  11    4.91    0.77
  -4  -8 -11    7.37    0.81
   4   8  11    7.28    0.71
  -5  -8 -11    8.51    0.89
   5   8  11    9.51    0.86
  -6  -8 -11    1.93    0.57
   6   8  11    1.95    0.42
  -7  -8 -11    1.36    0.56
   7   8  11    2.35    0.48
  -8  -8 -11    5.67    0.98
  -9  -8 -11    4.61    0.75
  10   8  11    0.07    0.22
   2  -9 -11    3.70    0.74
  -2   9  11    3.41    0.66
   1  -9 -11    7.84    1.17
  -1   9  11    6.94    1.04
   0  -9 -11    1.16    0.40
   0   9  11    0.35    0.37
  -1  -9 -11    4.05    0.70
   1   9  11    3.16    0.67
  -2  -9 -11    6.86    1.01
   2   9  11    6.41    0.75
  -3  -9 -11    1.19    0.60
   3   9  11    0.62    0.38
  -4  -9 -11    1.44    0.43
   4   9  11    0.41    0.30
  -5  -9 -11    3.27    0.65
   5   9  11    3.25    0.59
  -6  -9 -11    0.95    0.34
   6   9  11    0.18    0.26
  -7  -9 -11   -0.13    0.34
   7   9  11    0.16    0.24
  -8  -9 -11    1.79    0.55
  -9  -9 -11    6.28    1.06
  10   9  11    2.23    0.66
   1 -10 -11   -0.29    0.20
  -1  10  11   -0.24    0.36
   0 -10 -11    7.79    0.90
   0  10  11    7.62    0.90
  -1 -10 -11   14.63    1.22
   1  10  11   15.85    1.26
  -2 -10 -11    0.83    0.49
   2  10  11    1.32    0.41
  -3 -10 -11    8.04    0.90
   3  10  11    8.07    0.84
  -4 -10 -11    6.75    1.01
   4  10  11    5.97    0.94
  -5 -10 -11    8.75    0.98
   5  10  11   10.39    0.92
  -6 -10 -11    0.77    0.34
   6  10  11   -0.09    0.31
  -7 -10 -11    5.81    0.92
   7  10  11    6.26    0.89
  -8 -10 -11    4.60    0.89
  -9 -10 -11    2.00    0.61
   0 -11 -11    1.25    0.57
   0  11  11    1.68    0.64
  -1 -11 -11    9.49    1.09
   1  11  11   10.20    1.01
  -2 -11 -11    1.01    0.41
   2  11  11    0.15    0.40
  -3 -11 -11    0.97    0.31
   3  11  11    0.37    0.29
  -4 -11 -11    1.58    0.50
   4  11  11    0.14    0.33
  -5 -11 -11    3.92    0.89
   5  11  11    2.70    0.70
  -6 -11 -11    4.31    0.78
   6  11  11    3.25    0.66
  -7 -11 -11    0.76    0.36
  -8 -11 -11    2.01    0.65
  -9 -11 -11    0.22    0.30
  -2 -12 -11    2.65    0.65
   2  12  11    1.35    0.51
  -3 -12 -11    0.43    0.51
   3  12  11    0.88    0.53
   4  12  11    1.24    0.26
  -5 -12 -11    1.22    0.46
   5  12  11    1.67    0.47
  -6 -12 -11    1.21    0.49
   6  12  11    1.20    0.42
  -7 -12 -11    0.69    0.44
   7  12  11    0.44    0.32
   1   0 -12    1.06    0.42
   0   0 -12   -0.51    0.22
  -1   0 -12    9.72    0.96
  -2   0 -12    0.69    0.46
  -3   0 -12    3.95    0.72
   3   0  12    3.78    0.76
  -4   0 -12   16.56    1.26
   4   0  12   16.46    1.15
  -5   0 -12    2.81    0.66
   5   0  12    2.57    0.57
   2  -1 -12    1.64    0.68
   1  -1 -12    2.23    0.55
   0  -1 -12    7.54    1.12
  -1  -1 -12    4.01    0.80
  -2  -1 -12    0.37    0.21
  -3  -1 -12    0.09    0.33
  -4  -1 -12    0.54    0.27
  -5  -1 -12    1.28    0.45
   5   1  12    0.39    0.31
  -6  -1 -12    0.11    0.33
   6   1  12    0.07    0.20
   7   1  12   -0.05    0.19
  -2   2  12    1.21    0.48
  -1   2  12    1.31    0.54
   0  -2 -12    5.60    0.87
  -1  -2 -12    4.08    0.81
  -2  -2 -12    1.73    0.56
  -3  -2 -12    4.70    0.85
  -4  -2 -12    2.01    0.46
  -5  -2 -12    3.62    0.73
   6   2  12    3.98    0.71
   7   2  12    2.27    0.59
   8   2  12    1.27    0.49
  -3   3  12    4.36    0.93
  -2   3  12    3.28    0.72
  -1   3  12    2.61    0.59
   0   3  12   10.63    1.06
   1   3  12   -0.03    0.16
   2   3  12    1.21    0.39
  -3  -3 -12    4.41    0.73
   3   3  12    4.71    0.81
  -4  -3 -12    3.41    0.57
   4   3  12    2.67    0.63
  -5  -3 -12    2.76    0.63
   5   3  12    4.79    0.80
  -6  -3 -12   10.08    0.84
   6   3  12   10.28    0.86
   7   3  12    0.83    0.33
   8   3  12   14.65    1.03
  -9  -3 -12    0.77    0.48
   9   3  12    0.74    0.38
   3  -4 -12    0.97    0.41
  -3   4  12    1.57    0.39
   2  -4 -12   18.62    1.23
  -2   4  12   16.86    1.41
   1  -4 -12   17.59    1.21
  -1   4  12   15.85    1.30
   0  -4 -12    7.22    1.00
   0   4  12    5.52    0.90
  -1  -4 -12   -0.26    0.24
   1   4  12    0.16    0.35
  -2  -4 -12   11.29    0.94
   2   4  12   10.86    1.01
  -3  -4 -12   13.50    1.06
   3   4  12   13.63    1.09
  -4  -4 -12    4.29    0.68
   4   4  12    4.06    0.72
  -5  -4 -12    6.58    0.74
   5   4  12    7.65    0.86
  -6  -4 -12    1.93    0.62
   6   4  12    1.42    0.49
  -7  -4 -12    2.98    0.67
   7   4  12    3.25    0.60
   8   4  12    7.39    0.81
   3  -5 -12   10.90    1.06
  -3   5  12   10.60    1.41
   2  -5 -12   21.43    1.44
  -2   5  12   22.57    1.54
   1  -5 -12    3.77    0.71
  -1   5  12    3.83    0.84
   0  -5 -12    3.58    0.74
   0   5  12    3.70    0.79
  -1  -5 -12    2.92    0.65
   1   5  12    2.96    0.58
  -2  -5 -12    1.02    0.40
   2   5  12    1.18    0.36
  -3  -5 -12    0.05    0.41
   3   5  12   -0.30    0.16
  -4  -5 -12   17.62    1.19
   4   5  12   18.42    1.24
  -5  -5 -12    8.52    0.84
   5   5  12   10.78    0.88
  -6  -5 -12    1.84    0.38
   6   5  12    0.77    0.36
  -7  -5 -12    7.97    0.87
   7   5  12    8.61    0.84
  -8  -5 -12    0.73    0.43
   9   5  12    3.15    0.65
   3  -6 -12    0.56    0.34
  -3   6  12    1.22    0.53
   2  -6 -12    0.30    0.44
  -2   6  12    0.42    0.44
   1  -6 -12   22.61    1.42
  -1   6  12   24.55    1.57
   0  -6 -12    1.37    0.48
   0   6  12    0.30    0.34
  -1  -6 -12    0.58    0.26
   1   6  12    0.26    0.37
  -2  -6 -12    5.49    0.94
   2   6  12    4.63    0.85
  -3  -6 -12    5.22    0.80
   3   6  12    3.63    0.72
  -4  -6 -12   10.38    0.95
   4   6  12    7.97    0.82
  -5  -6 -12    0.65    0.29
   5   6  12   -0.10    0.31
  -6  -6 -12    8.96    0.90
   6   6  12    8.45    0.82
  -7  -6 -12    0.71    0.40
   7   6  12    2.01    0.45
  -8  -6 -12    0.70    0.39
   9   6  12    8.55    0.95
  10   6  12    0.54    0.54
   2  -7 -12    1.93    0.41
   1  -7 -12    2.30    0.63
  -1   7  12    1.68    0.68
   0  -7 -12    1.52    0.48
   0   7  12    1.04    0.43
  -1  -7 -12    9.09    0.99
   1   7  12   10.32    1.00
  -2  -7 -12    4.96    0.92
   2   7  12    4.56    0.83
  -3  -7 -12    8.68    0.93
   3   7  12    9.31    0.95
  -4  -7 -12    1.91    0.60
   4   7  12    2.46    0.58
  -5  -7 -12   -0.30    0.27
   5   7  12    0.15    0.14
  -6  -7 -12    0.25    0.36
   6   7  12   -0.38    0.16
  -7  -7 -12    2.49    0.53
   7   7  12    0.93    0.41
  -8  -7 -12    2.52    0.59
  -9  -7 -12    2.31    0.61
  10   7  12    1.45    0.48
   2  -8 -12    8.15    0.87
  -2   8  12    6.97    1.06
   1  -8 -12    0.05    0.35
  -1   8  12    0.60    0.31
   0  -8 -12    0.56    0.27
   0   8  12   -0.67    0.28
   1   8  12    0.30    0.27
  -2  -8 -12   -0.36    0.22
   2   8  12    0.57    0.21
  -3  -8 -12    0.55    0.30
   3   8  12    0.15    0.23
  -4  -8 -12    0.33    0.26
   4   8  12    0.05    0.33
  -5  -8 -12    3.09    0.76
   5   8  12    4.05    0.70
  -6  -8 -12    0.68    0.43
   6   8  12    0.41    0.31
  -7  -8 -12    7.01    1.03
   7   8  12    8.59    0.81
  -8  -8 -12    2.38    0.67
  -9  -8 -12    3.05    0.64
   1  -9 -12    2.08    0.63
  -1   9  12    2.52    0.66
   0  -9 -12    6.32    0.96
   0   9  12    5.44    0.95
  -1  -9 -12   -0.65    0.24
   1   9  12   -0.12    0.19
  -2  -9 -12   12.08    1.14
   2   9  12   11.60    1.06
  -3  -9 -12   22.10    1.48
   3   9  12   21.92    1.40
   4   9  12    0.11    0.20
  -5  -9 -12    2.76    0.80
   5   9  12    2.89    0.64
  -6  -9 -12   10.73    1.07
   6   9  12   10.72    0.94
  -7  -9 -12    4.30    0.82
   7   9  12    4.36    0.77
  -8  -9 -12    3.78    0.74
  -9  -9 -12    3.55    0.79
   0 -10 -12   -0.05    0.25
   0  10  12    0.54    0.33
  -1 -10 -12   10.65    1.15
   1  10  12   11.84    1.15
  -2 -10 -12   20.69    1.52
   2  10  12   22.26    1.47
  -3 -10 -12    1.66    0.54
   3  10  12    0.60    0.45
  -4 -10 -12    7.11    1.12
   4  10  12    7.50    1.06
  -5 -10 -12    0.32    0.45
   5  10  12    0.42    0.26
   6  10  12   -0.55    0.21
  -7 -10 -12    0.88    0.51
   7  10  12    2.15    0.51
  -8 -10 -12    5.51    1.00
  -2 -11 -12   16.70    1.35
   2  11  12   18.13    1.36
  -3 -11 -12    2.03    0.71
   3  11  12    2.67    0.55
  -4 -11 -12    1.92    0.67
   4  11  12    2.79    0.71
  -5 -11 -12    1.43    0.40
   5  11  12    1.50    0.48
  -6 -11 -12    4.04    0.88
   6  11  12    3.08    0.71
  -7 -11 -12    1.88    0.70
   7  11  12    1.32    0.47
   0   2  13    0.05    0.37
  -1  -2 -13    6.85    1.11
  -2  -2 -13    0.59    0.34
  -3  -2 -13    3.13    0.73
  -4  -2 -13    1.24    0.43
   5   2  13    3.97    0.70
   0   3  13    1.85    0.65
   1   3  13    3.62    0.75
   2   3  13    1.98    0.65
   3   3  13    0.31    0.29
   4   3  13    1.01    0.44
   5   3  13    1.42    0.37
   6   3  13    3.58    0.75
  -1   4  13    0.14    0.49
   0   4  13    0.50    0.35
   1   4  13   -0.20    0.35
   2   4  13    0.61    0.33
  -3  -4 -13    2.55    0.65
   3   4  13    2.97    0.68
  -4  -4 -13    7.44    0.81
   4   4  13    5.99    0.99
  -5  -4 -13    1.24    0.29
   5   4  13    0.09    0.42
  -6  -4 -13    1.99    0.56
   6   4  13    2.19    0.63
  -7  -4 -13    7.28    0.83
   1  -5 -13    7.45    1.14
  -1   5  13    5.63    1.02
   0  -5 -13    0.46    0.30
   0   5  13    0.18    0.30
  -1  -5 -13   19.74    1.36
   1   5  13   22.99    1.53
  -2  -5 -13    7.08    0.77
   2   5  13    7.40    1.11
  -3  -5 -13    0.44    0.41
   3   5  13    1.41    0.50
  -4  -5 -13    6.44    0.74
   4   5  13    6.77    0.77
  -5  -5 -13   18.94    1.28
   5   5  13   17.90    1.23
  -6  -5 -13    1.51    0.60
   6   5  13    1.00    0.36
  -7  -5 -13    2.42    0.62
   7   5  13    1.64    0.55
   8   5  13    0.16    0.37
   1  -6 -13    5.58    0.95
  -1   6  13    4.31    0.88
   0  -6 -13   21.02    1.47
   0   6  13   20.81    1.56
  -1  -6 -13    7.00    1.05
   1   6  13    6.52    1.05
  -2  -6 -13   -0.07    0.24
   2   6  13    0.38    0.24
  -3  -6 -13   13.64    1.15
   3   6  13   14.01    1.18
  -4  -6 -13    2.91    0.67
   4   6  13    3.29    0.78
  -5  -6 -13    1.66    0.46
   5   6  13    0.88    0.42
  -6  -6 -13   14.78    1.20
   6   6  13   13.76    1.10
  -7  -6 -13    3.24    0.80
   7   6  13    4.43    0.75
  -8  -6 -13    4.61    0.82
   0  -7 -13   -0.13    0.49
   0   7  13    0.92    0.49
  -1  -7 -13    2.43    0.59
   1   7  13    1.51    0.60
  -2  -7 -13    9.61    1.00
   2   7  13   10.47    1.02
  -3  -7 -13    1.90    0.51
   3   7  13    1.94    0.45
  -4  -7 -13    3.36    0.73
   4   7  13    2.73    0.60
  -5  -7 -13    4.47    0.83
   5   7  13    2.33    0.59
  -6  -7 -13    4.82    0.94
   6   7  13    4.99    0.83
  -7  -7 -13    1.16    0.48
   7   7  13    1.45    0.43
  -8  -7 -13    3.12    0.73
   0  -8 -13    3.13    0.73
   0   8  13    4.89    0.91
  -1  -8 -13    2.55    0.70
   1   8  13    3.92    0.77
  -2  -8 -13    1.56    0.65
   2   8  13    0.34    0.38
  -3  -8 -13    8.27    1.17
   3   8  13    9.31    1.04
  -4  -8 -13    4.12    0.90
   4   8  13    5.75    0.92
  -5  -8 -13    2.24    0.65
   5   8  13    2.86    0.73
  -6  -8 -13    7.61    1.10
   6   8  13    6.83    0.78
  -7  -8 -13    1.20    0.46
   7   8  13    1.44    0.49
  -8  -8 -13    0.74    0.55
  -1  -9 -13    2.13    0.77
   1   9  13    1.93    0.67
  -2  -9 -13    9.32    1.34
   2   9  13    9.83    1.02
   3   9  13    0.48    0.28
  -4  -9 -13    0.85    0.52
   4   9  13   -0.25    0.31
  -5  -9 -13    0.68    0.53
   5   9  13    2.03    0.40
  -6  -9 -13   11.85    1.10
   6   9  13   10.17    0.92
  -7  -9 -13    2.77    0.56
   7   9  13    1.39    0.44
  -8  -9 -13    0.92    0.50
  -2 -10 -13   20.17    1.54
   2  10  13   17.44    1.37
  -3 -10 -13    0.76    0.36
   3  10  13    0.61    0.31
  -4 -10 -13    5.80    1.11
   4  10  13    6.32    0.94
  -5 -10 -13    6.00    1.11
   5  10  13    4.77    0.86
  -6 -10 -13    2.41    0.51
   6  10  13    2.80    0.70
  -7 -10 -13    1.35    0.48
   7  10  13   -0.15    0.30
   2   5  14    0.77    0.24
  -3  -5 -14    3.87    0.94
   3   5  14    5.00    0.90
  -4  -5 -14    2.42    0.73
   4   5  14    2.87    0.61
  -5  -5 -14   15.33    1.22
   5   5  14   18.24    1.30
  -2  -6 -14    1.71    0.49
   2   6  14    0.80    0.59
  -3  -6 -14    0.96    0.61
   3   6  14    0.60    0.42
  -4  -6 -14   11.59    1.05
   4   6  14   12.36    1.19
  -5  -6 -14    5.49    0.87
   5   6  14    5.21    0.90
  -6  -6 -14    1.34    0.36
   6   6  14   -0.21    0.20
  -2  -7 -14    6.97    1.19
   2   7  14    9.80    0.96
  -3  -7 -14   10.99    1.09
   3   7  14   12.40    1.16
  -4  -7 -14    0.86    0.56
   4   7  14    1.36    0.41
  -5  -7 -14    4.40    0.81
   5   7  14    2.67    0.75
  -6  -7 -14   15.75    1.25
   6   7  14   14.05    1.16
  -3  -8 -14    0.79    0.56
   3   8  14    0.31    0.33
  -4  -8 -14   18.41    1.41
   4   8  14   17.55    1.42
  -5  -8 -14    3.54    0.71
   5   8  14    3.48    0.70
   0   0   0    0.00    0.00
;
_shelx_hkl_checksum   56265
