# Supplementary material for: Unpredictable cycloisomerization of 1,11-dien-6-ynes by a common cobalt catalyst
Source: Beilstein J Org Chem. 2017 Mar 31;13:639–43. doi: 10.3762/bjoc.13.62 (PMC5389203; doi:10.3762/bjoc.13.62)
Supplement: File 2 — Single crystal data for 1h and 2b. [file Beilstein_J_Org_Chem-13-639-s002.zip › 2b.cif]

 
data_2b
 
_audit_creation_method            SHELXL-2014/6
_chemical_name_systematic         ?
_chemical_name_common             ?
_chemical_melting_point           ?
_chemical_formula_moiety          
 'C24 H28 N2 O4 S2' 
_chemical_formula_sum
 'C24 H28 N2 O4 S2' 
_chemical_formula_weight          472.60

loop_
 _atom_type_symbol
 _atom_type_description
 _atom_type_scat_dispersion_real
 _atom_type_scat_dispersion_imag
 _atom_type_scat_source
 'C'  'C'   0.0033   0.0016
 'International Tables Vol C Tables 4.2.6.8 and 6.1.1.4'
 'H'  'H'   0.0000   0.0000
 'International Tables Vol C Tables 4.2.6.8 and 6.1.1.4'
 'N'  'N'   0.0061   0.0033
 'International Tables Vol C Tables 4.2.6.8 and 6.1.1.4'
 'O'  'O'   0.0106   0.0060
 'International Tables Vol C Tables 4.2.6.8 and 6.1.1.4'
 'S'  'S'   0.1246   0.1234
 'International Tables Vol C Tables 4.2.6.8 and 6.1.1.4'
 
_space_group_crystal_system       triclinic
_space_group_IT_number            2
_space_group_name_H-M_alt         'P -1'
_space_group_name_Hall            '-P 1'
 
_shelx_space_group_comment
;
The symmetry employed for this shelxl refinement is uniquely defined
by the following loop, which should always be used as a source of
symmetry information in preference to the above space-group names.
They are only intended as comments.
;
 
loop_
 _space_group_symop_operation_xyz
 'x, y, z'
 '-x, -y, -z'
 
_cell_length_a                    7.5018(12)
_cell_length_b                    12.743(2)
_cell_length_c                    13.473(2)
_cell_angle_alpha                 65.335(4)
_cell_angle_beta                  79.309(4)
_cell_angle_gamma                 86.703(4)
_cell_volume                      1149.9(3)
_cell_formula_units_Z             2
_cell_measurement_temperature     120(2)
_cell_measurement_reflns_used     2004
_cell_measurement_theta_min       3
_cell_measurement_theta_max       30
 
_exptl_crystal_description        prism
_exptl_crystal_colour             colorless
_exptl_crystal_density_meas       ?
_exptl_crystal_density_method     ?
_exptl_crystal_density_diffrn     1.365          
_exptl_crystal_F_000              500
_exptl_transmission_factor_min    ?
_exptl_transmission_factor_max    ?
_exptl_crystal_size_max           0.300
_exptl_crystal_size_mid           0.250
_exptl_crystal_size_min           0.150
_exptl_absorpt_coefficient_mu     0.266
_shelx_estimated_absorpt_T_min    0.925
_shelx_estimated_absorpt_T_max    0.961
_exptl_absorpt_correction_type    'multi-scan'   
_exptl_absorpt_correction_T_min   0.5990  
_exptl_absorpt_correction_T_max   0.7461  
_exptl_absorpt_process_details    'APEX2 (Bruker, 2005)' 
_exptl_absorpt_special_details    ?
_diffrn_ambient_temperature       120(2)
_diffrn_radiation_wavelength      0.71073
_diffrn_radiation_type            MoK\a
_diffrn_source                    ?
_diffrn_measurement_device_type   'Bruker SMART APEX2 CCD area detector'
_diffrn_measurement_method        'phi and omega scans'
_diffrn_detector_area_resol_mean  ?
_diffrn_reflns_number             18071
_diffrn_reflns_av_unetI/netI      0.1083
_diffrn_reflns_av_R_equivalents   0.1036
_diffrn_reflns_limit_h_min        -9
_diffrn_reflns_limit_h_max        9
_diffrn_reflns_limit_k_min        -15
_diffrn_reflns_limit_k_max        15
_diffrn_reflns_limit_l_min        -16
_diffrn_reflns_limit_l_max        16
_diffrn_reflns_theta_min          1.759
_diffrn_reflns_theta_max          25.995
_diffrn_reflns_theta_full         25.242
_diffrn_measured_fraction_theta_max   1.000
_diffrn_measured_fraction_theta_full  1.000
_diffrn_reflns_Laue_measured_fraction_max    1.000
_diffrn_reflns_Laue_measured_fraction_full   1.000
_diffrn_reflns_point_group_measured_fraction_max   1.000
_diffrn_reflns_point_group_measured_fraction_full  1.000
_reflns_number_total              4520
_reflns_number_gt                 2614
_reflns_threshold_expression      'I > 2\s(I)'
_reflns_Friedel_coverage          0.000
_reflns_Friedel_fraction_max      .
_reflns_Friedel_fraction_full     .
 
_reflns_special_details
;
 Reflections were merged by SHELXL according to the crystal
 class for the calculation of statistics and refinement.
 
 _reflns_Friedel_fraction is defined as the number of unique
 Friedel pairs measured divided by the number that would be
 possible theoretically, ignoring centric projections and
 systematic absences.
;
 
_computing_data_collection        'APEX2 (Bruker, 2005)' 
_computing_cell_refinement        'APEX2 (Bruker, 2005)' 
_computing_data_reduction         'APEX2 (Bruker, 2005)' 
_computing_structure_solution     'SHELXL-2014/6 (Sheldrick, 2014)'
_computing_structure_refinement 'SHELXL-2014/6 (Sheldrick, 2014)'
_computing_molecular_graphics     'SHELXL-2014/6 (Sheldrick, 2014)'
_computing_publication_material   'SHELXL-2014/6 (Sheldrick, 2014)'
_refine_special_details           ?
_refine_ls_structure_factor_coef  Fsqd
_refine_ls_matrix_type            full
_refine_ls_weighting_scheme       calc
_refine_ls_weighting_details
'w=1/[\s^2^(Fo^2^)+(0.1000P)^2^] where P=(Fo^2^+2Fc^2^)/3'
_atom_sites_solution_primary      ?
_atom_sites_solution_secondary    ?
_atom_sites_solution_hydrogens    geom
_refine_ls_hydrogen_treatment     constr
_refine_ls_extinction_method      none
_refine_ls_extinction_coef        .
_refine_ls_number_reflns          4520
_refine_ls_number_parameters      291
_refine_ls_number_restraints      0
_refine_ls_R_factor_all           0.1401
_refine_ls_R_factor_gt            0.0822
_refine_ls_wR_factor_ref          0.2060
_refine_ls_wR_factor_gt           0.1841
_refine_ls_goodness_of_fit_ref    1.078
_refine_ls_restrained_S_all       1.078
_refine_ls_shift/su_max           0.004
_refine_ls_shift/su_mean          0.000
 
loop_
 _atom_site_label
 _atom_site_type_symbol
 _atom_site_fract_x
 _atom_site_fract_y
 _atom_site_fract_z
 _atom_site_U_iso_or_equiv
 _atom_site_adp_type
 _atom_site_occupancy
 _atom_site_site_symmetry_order  
 _atom_site_calc_flag
 _atom_site_refinement_flags_posn
 _atom_site_refinement_flags_adp
 _atom_site_refinement_flags_occupancy
 _atom_site_disorder_assembly
 _atom_site_disorder_group
S1 S 0.56979(16) 0.09211(11) 0.27924(10) 0.0371(4) Uani 1 1 d . . . . .
S2 S 0.27176(15) 0.41033(9) 0.72404(9) 0.0263(3) Uani 1 1 d . . . . .
O1 O 0.4965(4) 0.0088(3) 0.2505(3) 0.0441(9) Uani 1 1 d . . . . .
O2 O 0.7300(4) 0.0660(3) 0.3292(3) 0.0464(9) Uani 1 1 d . . . . .
O3 O 0.1520(4) 0.4926(2) 0.7478(2) 0.0374(8) Uani 1 1 d . . . . .
O4 O 0.4628(4) 0.4342(3) 0.6929(2) 0.0331(8) Uani 1 1 d . . . . .
N1 N 0.4089(5) 0.1152(4) 0.3663(3) 0.0412(11) Uani 1 1 d . . . . .
N2 N 0.2082(5) 0.3922(3) 0.6222(3) 0.0249(8) Uani 1 1 d . . . . .
C1 C 0.2607(6) 0.2181(5) 0.4646(4) 0.0437(14) Uani 1 1 d . . . . .
C2 C 0.4475(7) 0.1849(5) 0.4260(5) 0.0537(16) Uani 1 1 d . . . . .
H2A H 0.5241 0.2539 0.3756 0.064 Uiso 1 1 calc R U . . .
H2B H 0.5080 0.1383 0.4895 0.064 Uiso 1 1 calc R U . . .
C3 C 0.2199(6) 0.1286(4) 0.3488(4) 0.0391(12) Uani 1 1 d . . . . .
H3A H 0.1717 0.0562 0.3523 0.047 Uiso 1 1 calc R U . . .
H3B H 0.2109 0.1917 0.2756 0.047 Uiso 1 1 calc R U . . .
C4 C 0.1179(7) 0.1569(6) 0.4401(5) 0.0658(19) Uani 1 1 d . . . . .
H4A H 0.1027 0.0802 0.5053 0.079 Uiso 1 1 calc R U . . .
C5 C -0.0565(7) 0.2036(6) 0.4467(5) 0.0672(19) Uani 1 1 d . . . . .
H5A H -0.1452 0.1439 0.4564 0.081 Uiso 1 1 calc R U . . .
H5B H -0.0622 0.2690 0.3744 0.081 Uiso 1 1 calc R U . . .
C6 C -0.1184(6) 0.2456(4) 0.5360(4) 0.0333(11) Uani 1 1 d . . . . .
H6A H -0.1389 0.1787 0.6092 0.040 Uiso 1 1 calc R U . . .
H6B H -0.2350 0.2854 0.5247 0.040 Uiso 1 1 calc R U . . .
C7 C 0.0203(7) 0.3277(5) 0.5355(4) 0.0484(14) Uani 1 1 d . . . . .
H7A H 0.0061 0.4047 0.4741 0.058 Uiso 1 1 calc R U . . .
C8 C 0.0208(6) 0.3475(4) 0.6388(4) 0.0300(11) Uani 1 1 d . . . . .
H8A H -0.0706 0.4047 0.6448 0.036 Uiso 1 1 calc R U . . .
H8B H -0.0042 0.2745 0.7065 0.036 Uiso 1 1 calc R U . . .
C9 C 0.3390(6) 0.3463(4) 0.5529(3) 0.0289(11) Uani 1 1 d . . . . .
H9A H 0.4196 0.2890 0.5978 0.035 Uiso 1 1 calc R U . . .
H9B H 0.4140 0.4093 0.4905 0.035 Uiso 1 1 calc R U . . .
C10 C 0.2158(6) 0.2911(4) 0.5121(4) 0.0320(11) Uani 1 1 d . . . . .
C11 C 0.6176(5) 0.2223(4) 0.1576(4) 0.0304(11) Uani 1 1 d . . . . .
C12 C 0.7219(6) 0.3097(4) 0.1574(4) 0.0378(12) Uani 1 1 d . . . . .
H12A H 0.7692 0.2993 0.2215 0.045 Uiso 1 1 calc R U . . .
C13 C 0.7557(6) 0.4117(4) 0.0627(4) 0.0391(13) Uani 1 1 d . . . . .
H13A H 0.8244 0.4716 0.0635 0.047 Uiso 1 1 calc R U . . .
C14 C 0.6919(6) 0.4291(4) -0.0337(4) 0.0390(12) Uani 1 1 d . . . . .
C15 C 0.5891(6) 0.3404(4) -0.0324(4) 0.0386(12) Uani 1 1 d . . . . .
H15A H 0.5449 0.3502 -0.0973 0.046 Uiso 1 1 calc R U . . .
C16 C 0.5505(6) 0.2382(4) 0.0622(4) 0.0349(12) Uani 1 1 d . . . . .
H16A H 0.4787 0.1792 0.0622 0.042 Uiso 1 1 calc R U . . .
C17 C 0.7331(7) 0.5389(5) -0.1369(4) 0.0551(15) Uani 1 1 d . . . . .
H17A H 0.6667 0.5382 -0.1928 0.083 Uiso 1 1 calc R U . . .
H17B H 0.8637 0.5452 -0.1661 0.083 Uiso 1 1 calc R U . . .
H17C H 0.6958 0.6050 -0.1193 0.083 Uiso 1 1 calc R U . . .
C18 C 0.2337(5) 0.2769(3) 0.8440(3) 0.0198(9) Uani 1 1 d . . . . .
C19 C 0.1059(6) 0.2698(4) 0.9352(3) 0.0292(11) Uani 1 1 d . . . . .
H19A H 0.0375 0.3354 0.9337 0.035 Uiso 1 1 calc R U . . .
C20 C 0.0790(6) 0.1658(4) 1.0291(4) 0.0330(11) Uani 1 1 d . . . . .
H20A H -0.0071 0.1613 1.0922 0.040 Uiso 1 1 calc R U . . .
C21 C 0.1754(6) 0.0684(4) 1.0323(3) 0.0280(11) Uani 1 1 d . . . . .
C22 C 0.3008(6) 0.0770(4) 0.9386(4) 0.0313(11) Uani 1 1 d . . . . .
H22A H 0.3654 0.0106 0.9388 0.038 Uiso 1 1 calc R U . . .
C23 C 0.3327(6) 0.1802(4) 0.8454(3) 0.0270(10) Uani 1 1 d . . . . .
H23A H 0.4211 0.1853 0.7831 0.032 Uiso 1 1 calc R U . . .
C24 C 0.1456(7) -0.0453(4) 1.1359(4) 0.0431(13) Uani 1 1 d . . . . .
H24A H 0.1516 -0.1098 1.1139 0.065 Uiso 1 1 calc R U . . .
H24B H 0.0261 -0.0458 1.1804 0.065 Uiso 1 1 calc R U . . .
H24C H 0.2399 -0.0531 1.1800 0.065 Uiso 1 1 calc R U . . .
 
loop_
 _atom_site_aniso_label
 _atom_site_aniso_U_11
 _atom_site_aniso_U_22
 _atom_site_aniso_U_33
 _atom_site_aniso_U_23
 _atom_site_aniso_U_13
 _atom_site_aniso_U_12
S1 0.0369(7) 0.0473(8) 0.0459(8) -0.0371(7) -0.0109(6) 0.0073(6)
S2 0.0396(7) 0.0186(6) 0.0256(6) -0.0139(5) -0.0057(5) -0.0005(5)
O1 0.054(2) 0.045(2) 0.049(2) -0.0350(19) -0.0076(16) 0.0010(17)
O2 0.041(2) 0.062(2) 0.057(2) -0.042(2) -0.0188(17) 0.0185(17)
O3 0.064(2) 0.0204(17) 0.0338(19) -0.0170(15) -0.0109(15) 0.0081(15)
O4 0.042(2) 0.0332(19) 0.0299(17) -0.0174(15) -0.0061(14) -0.0102(15)
N1 0.034(2) 0.062(3) 0.050(3) -0.045(2) -0.0098(19) 0.003(2)
N2 0.035(2) 0.021(2) 0.0220(19) -0.0117(17) -0.0052(15) -0.0003(16)
C1 0.029(3) 0.073(4) 0.055(3) -0.052(3) -0.005(2) -0.003(3)
C2 0.036(3) 0.090(4) 0.072(4) -0.071(4) -0.009(3) 0.001(3)
C3 0.033(3) 0.051(3) 0.055(3) -0.042(3) -0.010(2) -0.001(2)
C4 0.037(3) 0.111(5) 0.101(5) -0.092(5) -0.018(3) 0.004(3)
C5 0.040(4) 0.090(5) 0.110(5) -0.082(5) -0.003(3) -0.010(3)
C6 0.027(3) 0.041(3) 0.040(3) -0.024(2) -0.007(2) -0.001(2)
C7 0.044(3) 0.058(4) 0.054(3) -0.034(3) -0.008(3) 0.002(3)
C8 0.028(3) 0.031(3) 0.034(3) -0.016(2) -0.0075(19) 0.005(2)
C9 0.030(3) 0.033(3) 0.027(2) -0.018(2) 0.0034(19) -0.009(2)
C10 0.025(3) 0.045(3) 0.032(3) -0.024(2) 0.0027(19) -0.012(2)
C11 0.020(2) 0.039(3) 0.052(3) -0.039(3) -0.007(2) 0.011(2)
C12 0.023(3) 0.056(3) 0.059(3) -0.047(3) -0.010(2) 0.009(2)
C13 0.021(3) 0.047(3) 0.066(4) -0.042(3) -0.001(2) -0.001(2)
C14 0.020(3) 0.042(3) 0.059(3) -0.030(3) 0.005(2) 0.011(2)
C15 0.028(3) 0.047(3) 0.055(3) -0.031(3) -0.020(2) 0.014(2)
C16 0.028(3) 0.039(3) 0.058(3) -0.037(3) -0.016(2) 0.008(2)
C17 0.035(3) 0.049(4) 0.071(4) -0.021(3) 0.001(3) 0.011(3)
C18 0.027(2) 0.018(2) 0.017(2) -0.0088(19) -0.0051(17) -0.0015(18)
C19 0.024(2) 0.035(3) 0.032(3) -0.019(2) -0.0027(19) 0.005(2)
C20 0.023(3) 0.044(3) 0.028(3) -0.012(2) 0.0003(19) -0.002(2)
C21 0.030(3) 0.030(3) 0.024(2) -0.006(2) -0.0134(19) -0.014(2)
C22 0.044(3) 0.026(3) 0.035(3) -0.020(2) -0.017(2) 0.011(2)
C23 0.034(3) 0.028(3) 0.022(2) -0.016(2) -0.0031(19) 0.004(2)
C24 0.050(3) 0.038(3) 0.033(3) -0.001(2) -0.018(2) -0.014(2)
 
_geom_special_details
;
 All esds (except the esd in the dihedral angle between two l.s. planes)
 are estimated using the full covariance matrix.  The cell esds are taken
 into account individually in the estimation of esds in distances, angles
 and torsion angles; correlations between esds in cell parameters are only
 used when they are defined by crystal symmetry.  An approximate (isotropic)
 treatment of cell esds is used for estimating esds involving l.s. planes.
;
 
loop_
 _geom_bond_atom_site_label_1
 _geom_bond_atom_site_label_2
 _geom_bond_distance
 _geom_bond_site_symmetry_2
 _geom_bond_publ_flag
S1 O1 1.438(3) . ?
S1 O2 1.441(3) . ?
S1 N1 1.625(4) . ?
S1 C11 1.775(5) . ?
S2 O4 1.429(3) . ?
S2 O3 1.440(3) . ?
S2 N2 1.638(3) . ?
S2 C18 1.782(4) . ?
N1 C3 1.469(6) . ?
N1 C2 1.495(5) . ?
N2 C8 1.490(5) . ?
N2 C9 1.492(5) . ?
C1 C10 1.331(6) . ?
C1 C2 1.502(7) . ?
C1 C4 1.518(7) . ?
C2 H2A 0.9900 . ?
C2 H2B 0.9900 . ?
C3 C4 1.490(6) . ?
C3 H3A 0.9900 . ?
C3 H3B 0.9900 . ?
C4 C5 1.409(7) . ?
C4 H4A 1.0000 . ?
C5 C6 1.501(7) . ?
C5 H5A 0.9900 . ?
C5 H5B 0.9900 . ?
C6 C7 1.515(6) . ?
C6 H6A 0.9900 . ?
C6 H6B 0.9900 . ?
C7 C8 1.515(6) . ?
C7 C10 1.530(7) . ?
C7 H7A 1.0000 . ?
C8 H8A 0.9900 . ?
C8 H8B 0.9900 . ?
C9 C10 1.496(6) . ?
C9 H9A 0.9900 . ?
C9 H9B 0.9900 . ?
C11 C12 1.396(6) . ?
C11 C16 1.399(6) . ?
C12 C13 1.383(7) . ?
C12 H12A 0.9500 . ?
C13 C14 1.395(7) . ?
C13 H13A 0.9500 . ?
C14 C15 1.396(6) . ?
C14 C17 1.501(7) . ?
C15 C16 1.388(7) . ?
C15 H15A 0.9500 . ?
C16 H16A 0.9500 . ?
C17 H17A 0.9800 . ?
C17 H17B 0.9800 . ?
C17 H17C 0.9800 . ?
C18 C19 1.385(5) . ?
C18 C23 1.397(6) . ?
C19 C20 1.391(6) . ?
C19 H19A 0.9500 . ?
C20 C21 1.389(6) . ?
C20 H20A 0.9500 . ?
C21 C22 1.396(6) . ?
C21 C24 1.526(6) . ?
C22 C23 1.382(6) . ?
C22 H22A 0.9500 . ?
C23 H23A 0.9500 . ?
C24 H24A 0.9800 . ?
C24 H24B 0.9800 . ?
C24 H24C 0.9800 . ?
 
loop_
 _geom_angle_atom_site_label_1
 _geom_angle_atom_site_label_2
 _geom_angle_atom_site_label_3
 _geom_angle
 _geom_angle_site_symmetry_1
 _geom_angle_site_symmetry_3
 _geom_angle_publ_flag
O1 S1 O2 119.8(2) . . ?
O1 S1 N1 105.9(2) . . ?
O2 S1 N1 107.03(19) . . ?
O1 S1 C11 108.2(2) . . ?
O2 S1 C11 106.9(2) . . ?
N1 S1 C11 108.6(2) . . ?
O4 S2 O3 119.71(19) . . ?
O4 S2 N2 106.53(17) . . ?
O3 S2 N2 107.30(18) . . ?
O4 S2 C18 108.18(18) . . ?
O3 S2 C18 106.87(18) . . ?
N2 S2 C18 107.75(18) . . ?
C3 N1 C2 110.6(3) . . ?
C3 N1 S1 121.5(3) . . ?
C2 N1 S1 120.0(3) . . ?
C8 N2 C9 110.8(3) . . ?
C8 N2 S2 118.7(3) . . ?
C9 N2 S2 119.6(3) . . ?
C10 C1 C2 128.0(4) . . ?
C10 C1 C4 121.7(4) . . ?
C2 C1 C4 110.4(4) . . ?
N1 C2 C1 102.2(4) . . ?
N1 C2 H2A 111.3 . . ?
C1 C2 H2A 111.3 . . ?
N1 C2 H2B 111.3 . . ?
C1 C2 H2B 111.3 . . ?
H2A C2 H2B 109.2 . . ?
N1 C3 C4 105.4(4) . . ?
N1 C3 H3A 110.7 . . ?
C4 C3 H3A 110.7 . . ?
N1 C3 H3B 110.7 . . ?
C4 C3 H3B 110.7 . . ?
H3A C3 H3B 108.8 . . ?
C5 C4 C3 127.6(5) . . ?
C5 C4 C1 114.4(5) . . ?
C3 C4 C1 102.8(4) . . ?
C5 C4 H4A 103.0 . . ?
C3 C4 H4A 103.0 . . ?
C1 C4 H4A 103.0 . . ?
C4 C5 C6 118.1(5) . . ?
C4 C5 H5A 107.8 . . ?
C6 C5 H5A 107.8 . . ?
C4 C5 H5B 107.8 . . ?
C6 C5 H5B 107.8 . . ?
H5A C5 H5B 107.1 . . ?
C5 C6 C7 111.4(4) . . ?
C5 C6 H6A 109.3 . . ?
C7 C6 H6A 109.3 . . ?
C5 C6 H6B 109.3 . . ?
C7 C6 H6B 109.3 . . ?
H6A C6 H6B 108.0 . . ?
C6 C7 C8 120.0(4) . . ?
C6 C7 C10 112.9(4) . . ?
C8 C7 C10 101.3(4) . . ?
C6 C7 H7A 107.3 . . ?
C8 C7 H7A 107.3 . . ?
C10 C7 H7A 107.3 . . ?
N2 C8 C7 103.5(4) . . ?
N2 C8 H8A 111.1 . . ?
C7 C8 H8A 111.1 . . ?
N2 C8 H8B 111.1 . . ?
C7 C8 H8B 111.1 . . ?
H8A C8 H8B 109.0 . . ?
N2 C9 C10 102.3(3) . . ?
N2 C9 H9A 111.3 . . ?
C10 C9 H9A 111.3 . . ?
N2 C9 H9B 111.3 . . ?
C10 C9 H9B 111.3 . . ?
H9A C9 H9B 109.2 . . ?
C1 C10 C9 127.4(4) . . ?
C1 C10 C7 122.5(4) . . ?
C9 C10 C7 110.0(4) . . ?
C12 C11 C16 119.8(5) . . ?
C12 C11 S1 119.7(4) . . ?
C16 C11 S1 120.4(3) . . ?
C13 C12 C11 119.3(4) . . ?
C13 C12 H12A 120.4 . . ?
C11 C12 H12A 120.4 . . ?
C12 C13 C14 121.9(4) . . ?
C12 C13 H13A 119.0 . . ?
C14 C13 H13A 119.0 . . ?
C13 C14 C15 118.0(5) . . ?
C13 C14 C17 121.6(5) . . ?
C15 C14 C17 120.4(5) . . ?
C16 C15 C14 121.1(4) . . ?
C16 C15 H15A 119.5 . . ?
C14 C15 H15A 119.5 . . ?
C15 C16 C11 119.8(4) . . ?
C15 C16 H16A 120.1 . . ?
C11 C16 H16A 120.1 . . ?
C14 C17 H17A 109.5 . . ?
C14 C17 H17B 109.5 . . ?
H17A C17 H17B 109.5 . . ?
C14 C17 H17C 109.5 . . ?
H17A C17 H17C 109.5 . . ?
H17B C17 H17C 109.5 . . ?
C19 C18 C23 120.4(4) . . ?
C19 C18 S2 119.7(3) . . ?
C23 C18 S2 119.9(3) . . ?
C18 C19 C20 119.3(4) . . ?
C18 C19 H19A 120.3 . . ?
C20 C19 H19A 120.3 . . ?
C21 C20 C19 121.3(4) . . ?
C21 C20 H20A 119.4 . . ?
C19 C20 H20A 119.4 . . ?
C20 C21 C22 118.4(4) . . ?
C20 C21 C24 120.9(4) . . ?
C22 C21 C24 120.7(4) . . ?
C23 C22 C21 121.3(4) . . ?
C23 C22 H22A 119.4 . . ?
C21 C22 H22A 119.4 . . ?
C22 C23 C18 119.3(4) . . ?
C22 C23 H23A 120.3 . . ?
C18 C23 H23A 120.3 . . ?
C21 C24 H24A 109.5 . . ?
C21 C24 H24B 109.5 . . ?
H24A C24 H24B 109.5 . . ?
C21 C24 H24C 109.5 . . ?
H24A C24 H24C 109.5 . . ?
H24B C24 H24C 109.5 . . ?
 
loop_
 _geom_torsion_atom_site_label_1
 _geom_torsion_atom_site_label_2
 _geom_torsion_atom_site_label_3
 _geom_torsion_atom_site_label_4
 _geom_torsion
 _geom_torsion_site_symmetry_1
 _geom_torsion_site_symmetry_2
 _geom_torsion_site_symmetry_3
 _geom_torsion_site_symmetry_4
 _geom_torsion_publ_flag
O1 S1 N1 C3 -42.6(4) . . . . ?
O2 S1 N1 C3 -171.5(4) . . . . ?
C11 S1 N1 C3 73.4(4) . . . . ?
O1 S1 N1 C2 171.2(4) . . . . ?
O2 S1 N1 C2 42.3(5) . . . . ?
C11 S1 N1 C2 -72.8(4) . . . . ?
O4 S2 N2 C8 170.3(3) . . . . ?
O3 S2 N2 C8 -60.3(3) . . . . ?
C18 S2 N2 C8 54.4(3) . . . . ?
O4 S2 N2 C9 29.3(3) . . . . ?
O3 S2 N2 C9 158.7(3) . . . . ?
C18 S2 N2 C9 -86.6(3) . . . . ?
C3 N1 C2 C1 12.2(6) . . . . ?
S1 N1 C2 C1 161.8(4) . . . . ?
C10 C1 C2 N1 -172.1(5) . . . . ?
C4 C1 C2 N1 6.8(6) . . . . ?
C2 N1 C3 C4 -26.8(6) . . . . ?
S1 N1 C3 C4 -175.9(4) . . . . ?
N1 C3 C4 C5 164.1(6) . . . . ?
N1 C3 C4 C1 28.9(6) . . . . ?
C10 C1 C4 C5 14.4(9) . . . . ?
C2 C1 C4 C5 -164.6(6) . . . . ?
C10 C1 C4 C3 156.5(5) . . . . ?
C2 C1 C4 C3 -22.5(6) . . . . ?
C3 C4 C5 C6 -168.8(6) . . . . ?
C1 C4 C5 C6 -37.8(8) . . . . ?
C4 C5 C6 C7 51.4(7) . . . . ?
C5 C6 C7 C8 -158.4(5) . . . . ?
C5 C6 C7 C10 -39.1(6) . . . . ?
C9 N2 C8 C7 -28.8(5) . . . . ?
S2 N2 C8 C7 -172.9(3) . . . . ?
C6 C7 C8 N2 158.7(4) . . . . ?
C10 C7 C8 N2 33.8(5) . . . . ?
C8 N2 C9 C10 10.2(4) . . . . ?
S2 N2 C9 C10 154.0(3) . . . . ?
C2 C1 C10 C9 -8.9(9) . . . . ?
C4 C1 C10 C9 172.2(5) . . . . ?
C2 C1 C10 C7 172.8(5) . . . . ?
C4 C1 C10 C7 -6.0(8) . . . . ?
N2 C9 C10 C1 -165.9(5) . . . . ?
N2 C9 C10 C7 12.5(5) . . . . ?
C6 C7 C10 C1 19.4(7) . . . . ?
C8 C7 C10 C1 149.0(5) . . . . ?
C6 C7 C10 C9 -159.1(4) . . . . ?
C8 C7 C10 C9 -29.5(5) . . . . ?
O1 S1 C11 C12 -167.6(3) . . . . ?
O2 S1 C11 C12 -37.2(4) . . . . ?
N1 S1 C11 C12 78.0(4) . . . . ?
O1 S1 C11 C16 12.8(4) . . . . ?
O2 S1 C11 C16 143.1(3) . . . . ?
N1 S1 C11 C16 -101.7(3) . . . . ?
C16 C11 C12 C13 0.8(6) . . . . ?
S1 C11 C12 C13 -178.9(3) . . . . ?
C11 C12 C13 C14 -1.5(6) . . . . ?
C12 C13 C14 C15 0.9(6) . . . . ?
C12 C13 C14 C17 -178.5(4) . . . . ?
C13 C14 C15 C16 0.4(6) . . . . ?
C17 C14 C15 C16 179.8(4) . . . . ?
C14 C15 C16 C11 -1.0(6) . . . . ?
C12 C11 C16 C15 0.4(6) . . . . ?
S1 C11 C16 C15 -179.9(3) . . . . ?
O4 S2 C18 C19 130.5(3) . . . . ?
O3 S2 C18 C19 0.4(4) . . . . ?
N2 S2 C18 C19 -114.7(3) . . . . ?
O4 S2 C18 C23 -49.5(4) . . . . ?
O3 S2 C18 C23 -179.6(3) . . . . ?
N2 S2 C18 C23 65.4(4) . . . . ?
C23 C18 C19 C20 0.9(6) . . . . ?
S2 C18 C19 C20 -179.1(3) . . . . ?
C18 C19 C20 C21 -1.1(6) . . . . ?
C19 C20 C21 C22 -0.2(6) . . . . ?
C19 C20 C21 C24 179.7(4) . . . . ?
C20 C21 C22 C23 1.7(6) . . . . ?
C24 C21 C22 C23 -178.2(4) . . . . ?
C21 C22 C23 C18 -1.9(6) . . . . ?
C19 C18 C23 C22 0.6(6) . . . . ?
S2 C18 C23 C22 -179.4(3) . . . . ?
 
_refine_diff_density_max    1.026
_refine_diff_density_min   -0.417
_refine_diff_density_rms    0.093

_shelxl_version_number 2014/6

_shelx_res_file
;
TITL a_a.res in P-1
CELL 0.71073   7.5018  12.7433  13.4734  65.335  79.309  86.703
ZERR    2.00   0.0012   0.0021   0.0022   0.004   0.004   0.004
LATT  1
SFAC C H N O S
UNIT 48 56 4 8 4
TEMP -153.000
L.S. 4
BOND $H
htab
conf
size 0.15 0.25 0.30
omit -4 52
acta
FMAP 2
PLAN 20
WGHT    0.100000
FVAR       0.15927
S1    5    0.569793    0.092114    0.279240    11.00000    0.03691    0.04735 =
         0.04587   -0.03710   -0.01091    0.00732
S2    5    0.271759    0.410326    0.724041    11.00000    0.03961    0.01861 =
         0.02556   -0.01390   -0.00570   -0.00052
O1    4    0.496503    0.008838    0.250470    11.00000    0.05433    0.04451 =
         0.04890   -0.03503   -0.00764    0.00101
O2    4    0.730001    0.065984    0.329197    11.00000    0.04053    0.06153 =
         0.05676   -0.04156   -0.01882    0.01855
O3    4    0.151993    0.492611    0.747821    11.00000    0.06389    0.02042 =
         0.03383   -0.01703   -0.01092    0.00806
O4    4    0.462795    0.434190    0.692894    11.00000    0.04187    0.03318 =
         0.02991   -0.01736   -0.00609   -0.01021
N1    3    0.408903    0.115218    0.366265    11.00000    0.03448    0.06231 =
         0.05005   -0.04539   -0.00981    0.00341
N2    3    0.208237    0.392186    0.622221    11.00000    0.03460    0.02097 =
         0.02203   -0.01168   -0.00520   -0.00026
C1    1    0.260653    0.218074    0.464560    11.00000    0.02862    0.07324 =
         0.05478   -0.05155   -0.00540   -0.00339
C2    1    0.447464    0.184912    0.426031    11.00000    0.03630    0.09000 =
         0.07242   -0.07055   -0.00877    0.00126
AFIX  23
H2A   2    0.524100    0.253933    0.375628    11.00000   -1.20000
H2B   2    0.508010    0.138328    0.489539    11.00000   -1.20000
AFIX   0
C3    1    0.219941    0.128643    0.348784    11.00000    0.03341    0.05052 =
         0.05532   -0.04211   -0.01036   -0.00101
AFIX  23
H3A   2    0.171718    0.056228    0.352314    11.00000   -1.20000
H3B   2    0.210890    0.191684    0.275577    11.00000   -1.20000
AFIX   0
C4    1    0.117888    0.156939    0.440127    11.00000    0.03676    0.11128 =
         0.10071   -0.09206   -0.01753    0.00392
AFIX  13
H4A   2    0.102652    0.080181    0.505328    11.00000   -1.20000
AFIX   0
C5    1   -0.056511    0.203565    0.446747    11.00000    0.04049    0.09019 =
         0.10957   -0.08190   -0.00292   -0.00980
AFIX  23
H5A   2   -0.145159    0.143933    0.456409    11.00000   -1.20000
H5B   2   -0.062240    0.269030    0.374433    11.00000   -1.20000
AFIX   0
C6    1   -0.118389    0.245577    0.536046    11.00000    0.02687    0.04142 =
         0.03960   -0.02403   -0.00672   -0.00083
AFIX  23
H6A   2   -0.138905    0.178660    0.609228    11.00000   -1.20000
H6B   2   -0.235026    0.285385    0.524722    11.00000   -1.20000
AFIX   0
C7    1    0.020300    0.327744    0.535468    11.00000    0.04415    0.05770 =
         0.05407   -0.03392   -0.00802    0.00168
AFIX  13
H7A   2    0.006086    0.404680    0.474130    11.00000   -1.20000
AFIX   0
C8    1    0.020839    0.347500    0.638804    11.00000    0.02828    0.03078 =
         0.03392   -0.01612   -0.00750    0.00524
AFIX  23
H8A   2   -0.070600    0.404730    0.644813    11.00000   -1.20000
H8B   2   -0.004204    0.274524    0.706460    11.00000   -1.20000
AFIX   0
C9    1    0.339048    0.346319    0.552941    11.00000    0.03033    0.03274 =
         0.02676   -0.01766    0.00338   -0.00909
AFIX  23
H9A   2    0.419612    0.289027    0.597801    11.00000   -1.20000
H9B   2    0.414033    0.409257    0.490547    11.00000   -1.20000
AFIX   0
C10   1    0.215805    0.291074    0.512126    11.00000    0.02535    0.04514 =
         0.03167   -0.02363    0.00274   -0.01195
C11   1    0.617553    0.222349    0.157588    11.00000    0.02030    0.03905 =
         0.05190   -0.03935   -0.00721    0.01119
C12   1    0.721937    0.309728    0.157365    11.00000    0.02339    0.05566 =
         0.05869   -0.04705   -0.01011    0.00850
AFIX  43
H12A  2    0.769234    0.299267    0.221498    11.00000   -1.20000
AFIX   0
C13   1    0.755718    0.411683    0.062739    11.00000    0.02147    0.04688 =
         0.06602   -0.04242   -0.00134   -0.00085
AFIX  43
H13A  2    0.824382    0.471635    0.063467    11.00000   -1.20000
AFIX   0
C14   1    0.691911    0.429058   -0.033744    11.00000    0.01997    0.04168 =
         0.05853   -0.02995    0.00464    0.01063
C15   1    0.589149    0.340396   -0.032391    11.00000    0.02800    0.04654 =
         0.05504   -0.03109   -0.01953    0.01383
AFIX  43
H15A  2    0.544946    0.350184   -0.097315    11.00000   -1.20000
AFIX   0
C16   1    0.550505    0.238210    0.062211    11.00000    0.02827    0.03868 =
         0.05760   -0.03698   -0.01562    0.00760
AFIX  43
H16A  2    0.478711    0.179187    0.062203    11.00000   -1.20000
AFIX   0
C17   1    0.733084    0.538908   -0.136944    11.00000    0.03549    0.04882 =
         0.07108   -0.02097    0.00108    0.01134
AFIX 137
H17A  2    0.666699    0.538165   -0.192817    11.00000   -1.50000
H17B  2    0.863675    0.545236   -0.166094    11.00000   -1.50000
H17C  2    0.695754    0.605024   -0.119281    11.00000   -1.50000
AFIX   0
C18   1    0.233712    0.276896    0.843957    11.00000    0.02682    0.01817 =
         0.01682   -0.00885   -0.00508   -0.00149
C19   1    0.105945    0.269837    0.935227    11.00000    0.02412    0.03462 =
         0.03248   -0.01892   -0.00268    0.00534
AFIX  43
H19A  2    0.037455    0.335390    0.933710    11.00000   -1.20000
AFIX   0
C20   1    0.078954    0.165810    1.029104    11.00000    0.02251    0.04354 =
         0.02811   -0.01193    0.00029   -0.00159
AFIX  43
H20A  2   -0.007081    0.161292    1.092204    11.00000   -1.20000
AFIX   0
C21   1    0.175420    0.068391    1.032346    11.00000    0.02992    0.03005 =
         0.02393   -0.00568   -0.01339   -0.01362
C22   1    0.300814    0.076963    0.938551    11.00000    0.04382    0.02566 =
         0.03499   -0.02009   -0.01694    0.01054
AFIX  43
H22A  2    0.365425    0.010553    0.938758    11.00000   -1.20000
AFIX   0
C23   1    0.332725    0.180177    0.845448    11.00000    0.03441    0.02831 =
         0.02237   -0.01575   -0.00312    0.00422
AFIX  43
H23A  2    0.421114    0.185314    0.783076    11.00000   -1.20000
AFIX   0
C24   1    0.145582   -0.045277    1.135923    11.00000    0.05029    0.03782 =
         0.03287   -0.00053   -0.01771   -0.01407
AFIX 137
H24A  2    0.151622   -0.109816    1.113930    11.00000   -1.50000
H24B  2    0.026082   -0.045848    1.180383    11.00000   -1.50000
H24C  2    0.239886   -0.053143    1.179954    11.00000   -1.50000

AFIX   0
HKLF 4

REM  a_a.res in P-1
REM R1 =  0.0822 for    2614 Fo > 4sig(Fo)  and  0.1401 for all    4520 data
REM    291 parameters refined using      0 restraints

END

WGHT      0.1132      0.0000

REM Instructions for potential hydrogen bonds
EQIV $1 -x+1, -y+1, -z+1
HTAB C9 O4_$1

REM Highest difference peak  1.026,  deepest hole -0.417,  1-sigma level  0.093
Q1    1   0.0559  0.2532  0.6058  11.00000  0.05    1.03
Q2    1   0.1089  0.2368  0.3804  11.00000  0.05    0.71
Q3    1  -0.0363  0.1349  0.5119  11.00000  0.05    0.66
Q4    1   0.2517  0.3429  0.7949  11.00000  0.05    0.57
Q5    1   0.4496  0.2693  0.3635  11.00000  0.05    0.52
Q6    1   0.2202  0.3892  0.6833  11.00000  0.05    0.47
Q7    1   0.4255  0.4415  0.6824  11.00000  0.05    0.44
Q8    1   0.2491  0.2813  0.4183  11.00000  0.05    0.41
Q9    1   0.3919  0.3843  0.7267  11.00000  0.05    0.39
Q10   1   0.6226  0.0940  0.3339  11.00000  0.05    0.39
Q11   1   0.8702  0.0958  0.2784  11.00000  0.05    0.39
Q12   1   0.1782  0.3737  0.6211  11.00000  0.05    0.37
Q13   1   0.2832  0.4806  0.7365  11.00000  0.05    0.36
Q14   1   0.5902  0.4133  0.7191  11.00000  0.05    0.36
Q15   1   0.4774  0.1162  0.3171  11.00000  0.05    0.35
Q16   1   0.6933  0.1200  0.2412  11.00000  0.05    0.34
Q17   1   0.4412  0.1243  0.4021  11.00000  0.05    0.34
Q18   1   0.2129  0.2815  0.8715  11.00000  0.05    0.33
Q19   1   0.6259  0.1604  0.2206  11.00000  0.05    0.33
Q20   1   0.8304  0.6054 -0.1349  11.00000  0.05    0.33
;
_shelx_res_checksum   76658

_shelx_hkl_file
;
  -1   0   0   29.71    0.48
  -1   0   0   29.68    0.70
   1   0   0   28.17    0.69
   1   0   0   30.13    0.90
   1   0   0   32.25    1.00
   1   0   0   30.29    0.47
   1   0   0   31.93    0.70
  -2   0   0   36.13    0.68
  -2   0   0   36.84    1.08
   2   0   0   39.26    1.64
   2   0   0   37.53    1.08
   2   0   0   36.04    1.46
  -3   0   0    7.17    0.37
  -3   0   0    8.16    0.70
   3   0   0    7.10    1.09
   3   0   0    6.14    1.01
   3   0   0    7.11    0.68
  -4   0   0   24.81    0.63
  -4   0   0   27.54    1.31
   4   0   0   28.72    1.89
   4   0   0   26.05    1.91
   4   0   0   27.47    1.23
  -5   0   0    0.76    0.53
   5   0   0    0.62    0.85
   5   0   0    0.32    0.49
   5   0   0    1.35    0.81
  -6   0   0   16.61    1.68
   6   0   0   15.85    2.37
   6   0   0   15.88    1.34
  -7   0   0    9.54    1.62
  -7   0   0    9.64    1.56
   7   0   0    6.31    1.69
   7   0   0   10.25    1.33
  -8   0   0   -1.89    1.46
  -8   0   0    1.64    1.17
   8   0   0   -0.38    1.77
  -9   0   0    4.11    1.67
  -9   0   0   -4.44    2.39
   9   0   0   -1.28    2.37
 -10   0   0    6.11    2.16
  10   0   0   -0.65    2.62
  10  -1   0    0.09    3.03
 -10   1   0   11.08    2.22
   9  -1   0    2.24    2.57
  -9   1   0    9.55    2.06
   8  -1   0    4.13    2.14
  -8   1   0    8.55    2.19
   7  -1   0    0.66    1.26
   7  -1   0   -0.03    1.32
   7  -1   0   -0.33    0.41
  -7   1   0   -0.78    0.86
   6  -1   0    1.02    0.50
   6  -1   0    1.06    1.08
   6  -1   0    0.25    0.98
  -6   1   0    0.79    0.63
  -6   1   0    0.44    0.30
   5  -1   0    2.44    0.97
   5  -1   0    1.90    0.50
   5  -1   0    1.72    0.89
  -5   1   0    2.04    0.35
  -5   1   0    2.14    0.59
   4  -1   0    3.21    0.84
   4  -1   0    3.75    0.85
   4  -1   0    3.25    0.45
  -4   1   0    3.45    0.57
  -4   1   0    4.35    0.50
   3  -1   0   59.36    2.33
   3  -1   0   56.41    2.17
   3  -1   0   58.56    1.38
  -3   1   0   56.34    1.64
  -3   1   0   56.62    1.21
   2  -1   0  113.75    2.86
   2  -1   0  126.51    3.05
   2  -1   0  119.78    1.96
  -2   1   0  122.33    2.35
  -2   1   0  120.76    1.93
  -2   1   0  122.88    2.04
   1  -1   0   24.49    0.44
   1  -1   0   21.73    0.86
   1  -1   0   28.62    0.95
   1  -1   0   23.24    0.73
  -1   1   0   23.74    0.45
  -1   1   0   24.79    0.59
   0  -1   0    0.15    0.06
   0  -1   0    0.23    0.08
   0  -1   0    0.17    0.10
   0   1   0    0.26    0.08
   0   1   0    0.22    0.06
  -1  -1   0  176.39    3.13
  -1  -1   0  173.47    2.48
  -1  -1   0  173.55    2.72
   1   1   0  182.32    2.84
   1   1   0  171.66    2.32
   1   1   0  181.58    3.27
  -2  -1   0   13.16    0.75
  -2  -1   0   11.84    0.79
   2   1   0   11.20    0.87
   2   1   0   12.82    1.09
  -3  -1   0    0.63    0.34
  -3  -1   0    0.35    0.32
   3   1   0    0.44    0.38
   3   1   0    0.43    0.50
  -4  -1   0   25.69    1.35
  -4  -1   0   25.13    1.48
   4   1   0   26.02    1.40
   4   1   0   25.42    1.91
  -5  -1   0   -0.31    0.38
  -5  -1   0    0.63    0.57
   5   1   0   -0.08    0.51
   5   1   0   -0.27    0.74
  -6  -1   0    2.10    0.80
  -6  -1   0    1.97    0.78
   6   1   0    2.77    1.19
   6   1   0    2.29    0.77
  -7  -1   0   -0.42    0.67
  -7  -1   0    0.62    1.06
   7   1   0   -0.08    0.56
   7   1   0    0.12    1.23
  -8  -1   0   -1.38    1.50
  -8  -1   0   -0.71    1.17
   8   1   0   -0.54    1.73
   8   1   0    0.56    0.69
  -9  -1   0   -0.17    1.79
  -9  -1   0   -4.00    2.34
   9   1   0    3.24    2.54
 -10  -1   0    1.33    2.66
  10   1   0    0.01    2.99
  10  -2   0    1.85    3.15
   9  -2   0    7.57    2.87
  -9   2   0    3.36    2.71
   8  -2   0    2.79    1.97
   8  -2   0    3.12    2.31
  -8   2   0    2.57    1.80
   7  -2   0    1.67    1.47
   7  -2   0    2.20    1.53
  -7   2   0    1.84    1.02
   6  -2   0    4.00    0.61
   6  -2   0    2.98    1.24
   6  -2   0    3.97    1.35
  -6   2   0    3.15    0.49
  -6   2   0    3.82    0.83
   5  -2   0   20.58    2.04
   5  -2   0   19.04    0.99
   5  -2   0   20.59    2.09
  -5   2   0   19.82    1.37
  -5   2   0   19.35    1.00
   4  -2   0    7.42    0.58
   4  -2   0    6.44    1.03
   4  -2   0    6.45    1.08
  -4   2   0    8.38    0.67
  -4   2   0    7.63    0.82
   3  -2   0    7.40    1.08
   3  -2   0    6.61    1.04
   3  -2   0    7.63    0.45
  -3   2   0    7.21    0.66
  -3   2   0    7.19    0.57
   2  -2   0   10.68    1.04
   2  -2   0   11.75    0.38
   2  -2   0   11.98    1.07
  -2   2   0   11.82    0.63
  -2   2   0   10.16    0.69
  -2   2   0   10.77    0.43
   1  -2   0   61.25    1.49
   1  -2   0   59.76    1.81
   1  -2   0   64.96    1.61
  -1   2   0   61.66    1.28
  -1   2   0   63.28    1.04
   0  -2   0    3.03    0.27
   0  -2   0    3.26    0.32
   0   2   0    3.46    0.23
   0   2   0    3.40    0.30
   0   2   0    3.77    0.37
  -1  -2   0    5.29    0.66
  -1  -2   0    5.46    0.53
   1   2   0    5.34    0.34
   1   2   0    5.92    0.66
   1   2   0    4.60    0.56
  -2  -2   0   20.00    1.14
  -2  -2   0   20.05    1.00
   2   2   0   19.19    0.53
   2   2   0   19.25    0.47
   2   2   0   19.83    1.19
   2   2   0   19.64    1.25
  -3  -2   0   16.72    1.15
  -3  -2   0   17.49    1.08
   3   2   0   16.92    1.39
   3   2   0   18.61    1.24
  -4  -2   0    1.22    0.52
  -4  -2   0    1.00    0.52
   4   2   0   -0.01    0.66
   4   2   0    0.94    0.54
  -5  -2   0    2.69    0.74
  -5  -2   0    3.24    0.83
   5   2   0    2.77    0.78
   5   2   0    1.82    0.96
  -6  -2   0    1.82    0.87
  -6  -2   0    0.85    0.68
   6   2   0    0.79    0.70
   6   2   0    0.53    1.05
  -7  -2   0    4.04    1.33
  -7  -2   0    5.25    1.46
   7   2   0    3.80    1.70
   7   2   0    5.21    1.07
  -8  -2   0   -0.58    1.54
  -8  -2   0   -1.60    1.38
   8   2   0    0.12    0.77
   8   2   0   -0.83    1.97
  -9  -2   0   -0.49    2.16
  -9  -2   0   -3.19    2.37
   9   2   0    0.43    2.75
 -10  -2   0   -3.43    2.69
 -10  -2   0   -6.85    3.13
  10   2   0    1.27    3.05
   9  -3   0    1.45    2.68
   9  -3   0   -0.82    3.16
   8  -3   0    4.06    2.47
   8  -3   0    3.39    1.95
  -8   3   0    3.46    1.81
   7  -3   0    0.58    1.38
   7  -3   0   -0.09    1.39
  -7   3   0   -0.20    0.78
   6  -3   0    2.17    1.27
   6  -3   0    1.60    0.54
   6  -3   0    1.14    1.11
  -6   3   0    1.03    0.65
  -6   3   0    1.13    0.48
   5  -3   0   -0.08    0.81
   5  -3   0    0.37    0.82
   5  -3   0    0.04    0.28
  -5   3   0    0.01    0.39
  -5   3   0    0.35    0.39
   4  -3   0   20.04    0.69
   4  -3   0   19.83    1.73
   4  -3   0   20.57    1.84
  -4   3   0   20.10    1.01
  -4   3   0   19.82    1.21
   3  -3   0    1.58    0.60
   3  -3   0    1.66    0.63
   3  -3   0    1.30    0.17
  -3   3   0    1.17    0.32
  -3   3   0    1.15    0.36
   2  -3   0    0.43    0.37
   2  -3   0    0.24    0.47
   2  -3   0    0.38    0.47
  -2   3   0    0.46    0.26
   1  -3   0   11.22    0.79
   1  -3   0   11.96    0.90
   1  -3   0   10.77    1.16
   1  -3   0   11.95    0.52
  -1   3   0   11.67    0.67
  -1   3   0   11.73    0.64
   0  -3   0    0.74    0.25
   0  -3   0    0.35    0.27
   0  -3   0   -0.15    0.53
   0   3   0    0.34    0.35
   0   3   0    0.28    0.21
  -1  -3   0    9.77    1.14
  -1  -3   0    9.36    0.76
   1   3   0    9.16    0.93
   1   3   0    9.76    0.56
   1   3   0    9.57    0.77
  -2  -3   0    0.65    0.47
  -2  -3   0    0.23    0.38
   2   3   0   -0.12    0.46
   2   3   0    0.25    0.44
   2   3   0    0.34    0.21
  -3  -3   0    4.66    0.65
  -3  -3   0    4.10    0.75
   3   3   0    4.76    0.41
   3   3   0    4.62    0.85
   3   3   0    4.95    0.32
   3   3   0    4.33    0.75
  -4  -3   0    8.43    1.20
  -4  -3   0    7.89    1.15
   4   3   0    8.60    1.47
   4   3   0    6.84    0.97
  -5  -3   0    1.44    0.80
  -5  -3   0    1.23    0.71
   5   3   0    1.07    0.76
   5   3   0    1.06    0.91
  -6  -3   0    2.25    0.95
  -6  -3   0    2.22    0.97
   6   3   0    2.02    1.21
   6   3   0    2.10    0.88
  -7  -3   0    0.63    1.07
  -7  -3   0    0.04    1.08
   7   3   0    0.36    0.87
   7   3   0   -1.14    1.30
  -8  -3   0   -1.05    1.51
  -8  -3   0   -0.98    1.61
   8   3   0    0.69    0.89
   8   3   0    0.02    1.96
  -9  -3   0   -4.01    2.24
  -9  -3   0   -4.65    2.52
   9   3   0   -0.15    2.73
   9   3   0   -0.42    1.02
 -10  -3   0    0.47    3.25
 -10  -3   0   -1.52    3.31
  10   3   0    1.23    3.12
  10  -4   0   -0.84    3.76
  10  -4   0    1.89    3.14
   9  -4   0    0.09    2.50
   9  -4   0   -0.41    3.08
  -9   4   0   -2.50    2.24
   8  -4   0    1.55    2.35
   8  -4   0    0.77    2.01
  -8   4   0   -0.76    1.51
   7  -4   0   -0.69    1.41
   7  -4   0   -0.44    1.23
  -7   4   0   -0.48    0.84
   6  -4   0   23.04    2.70
   6  -4   0   27.35    2.89
  -6   4   0   26.73    1.86
  -6   4   0   23.65    1.41
   5  -4   0   32.50    2.49
   5  -4   0   32.22    2.57
  -5   4   0   31.92    1.74
  -5   4   0   32.77    1.51
   4  -4   0   -0.58    0.66
   4  -4   0   -0.10    0.61
  -4   4   0    0.25    0.35
  -4   4   0   -0.06    0.30
   3  -4   0   19.74    1.54
   3  -4   0   18.16    1.62
  -3   4   0   18.70    1.04
   2  -4   0   27.83    1.43
   2  -4   0   23.39    1.61
   2  -4   0   24.85    1.27
  -2   4   0   25.23    1.07
  -2   4   0   25.13    0.77
  -2   4   0   25.05    0.62
   1  -4   0   10.24    1.28
   1  -4   0   11.60    0.89
   1  -4   0   10.74    0.90
  -1   4   0   11.24    0.82
  -1   4   0   11.56    0.77
   0  -4   0   10.40    0.75
   0  -4   0    9.26    0.62
   0  -4   0    9.76    0.76
   0  -4   0    8.24    1.36
   0   4   0   10.37    0.71
   0   4   0    9.88    0.95
  -1  -4   0   56.06    1.60
  -1  -4   0   52.42    2.26
   1   4   0   55.05    1.88
   1   4   0   52.66    1.38
   1   4   0   54.65    1.61
  -2  -4   0    4.65    0.63
  -2  -4   0    5.26    0.92
   2   4   0    5.26    0.76
   2   4   0    5.79    0.59
   2   4   0    6.32    0.90
  -3  -4   0   13.55    1.40
  -3  -4   0   13.86    1.17
   3   4   0   14.74    1.45
   3   4   0   13.23    0.71
   3   4   0   13.96    1.39
  -4  -4   0    8.75    1.32
  -4  -4   0    6.94    1.15
   4   4   0    7.30    1.10
   4   4   0    7.27    1.25
  -5  -4   0    2.14    0.91
  -5  -4   0    1.36    0.78
   5   4   0    0.22    0.84
   5   4   0    1.35    0.97
  -6  -4   0    5.40    1.15
  -6  -4   0    4.76    1.35
   6   4   0    4.88    1.21
   6   4   0    4.24    1.49
  -7  -4   0    5.20    1.44
  -7  -4   0    3.90    1.79
   7   4   0    3.40    1.90
   7   4   0    3.55    1.21
  -8  -4   0    3.88    2.65
  -8  -4   0    5.42    1.88
   8   4   0    3.10    2.39
   8   4   0    6.32    1.60
  -9  -4   0    0.63    2.29
  -9  -4   0   -1.57    2.85
   9   4   0    0.87    1.36
   9   4   0    0.80    2.57
 -10  -4   0   -3.80    3.33
  10   4   0    5.96    3.39
  10  -5   0    0.78    3.55
  10  -5   0    3.65    3.26
 -10   5   0   -5.66    2.82
   9  -5   0    3.03    2.81
   9  -5   0    1.39    3.44
   8  -5   0    0.57    2.55
   8  -5   0    2.83    2.06
  -8   5   0   -0.35    1.62
   7  -5   0    8.24    2.17
   7  -5   0    7.84    2.27
  -7   5   0    6.50    1.53
   6  -5   0    1.45    1.26
   6  -5   0    0.56    0.97
  -6   5   0    0.06    0.49
  -6   5   0    0.00    0.54
   5  -5   0    5.93    1.29
   5  -5   0    4.99    1.25
  -5   5   0    5.10    0.75
  -5   5   0    4.87    0.85
   4  -5   0    2.36    0.97
   4  -5   0    2.71    0.88
  -4   5   0    2.22    0.55
  -4   5   0    1.77    0.53
   3  -5   0    1.87    0.68
   3  -5   0    1.88    0.61
   3  -5   0    1.29    0.71
  -3   5   0    2.07    0.50
   2  -5   0   -0.49    0.57
   2  -5   0   -0.36    0.38
   2  -5   0    0.26    0.43
  -2   5   0    0.23    0.33
  -2   5   0    0.03    0.31
   1  -5   0   10.51    0.89
   1  -5   0    9.48    1.41
   1  -5   0   10.25    0.92
  -1   5   0    9.82    0.88
  -1   5   0   10.53    0.82
   0  -5   0    0.50    0.34
   0  -5   0    0.96    0.71
   0  -5   0    0.98    0.36
   0   5   0    0.43    0.30
   0   5   0    0.45    0.45
  -1  -5   0    0.37    0.38
  -1  -5   0    0.24    0.69
   1   5   0   -0.07    0.32
   1   5   0    0.15    0.54
   1   5   0    0.46    0.29
  -2  -5   0    0.38    0.68
  -2  -5   0    0.18    0.42
   2   5   0   -0.05    0.55
   2   5   0    0.26    0.28
   2   5   0    0.09    0.44
  -3  -5   0   19.04    1.93
  -3  -5   0   19.03    1.36
   3   5   0   19.45    1.74
   3   5   0   19.28    1.63
   3   5   0   17.78    0.95
  -4  -5   0   11.84    1.44
  -4  -5   0   13.86    1.88
   4   5   0   11.07    0.80
   4   5   0    9.74    1.35
   4   5   0   12.97    1.85
  -5  -5   0   14.24    2.10
  -5  -5   0   13.08    1.67
   5   5   0   14.23    2.09
   5   5   0   15.57    2.41
  -6  -5   0    0.54    1.20
  -6  -5   0   -0.07    0.85
   6   5   0    0.41    0.99
   6   5   0    0.58    1.34
  -7  -5   0    0.42    1.11
  -7  -5   0   -0.03    1.66
   7   5   0    1.37    1.82
   7   5   0    0.17    1.12
  -8  -5   0    1.12    1.59
  -8  -5   0   -3.37    2.18
   8   5   0    1.07    1.42
   8   5   0    3.03    2.80
  -9  -5   0   -1.22    2.22
  -9  -5   0   -4.68    3.17
   9   5   0    0.62    2.76
   9   5   0    3.09    1.69
  10   5   0   -0.94    3.10
  10  -6   0    1.79    3.06
  10  -6   0   -2.67    3.58
   9  -6   0    2.26    2.68
   9  -6   0   -0.47    3.19
  -9   6   0   -4.72    2.35
   8  -6   0   -0.24    2.55
   8  -6   0    1.91    2.18
  -8   6   0    0.18    1.66
   7  -6   0    1.38    1.36
   7  -6   0    0.68    1.91
  -7   6   0    1.01    1.14
  -7   6   0   -0.27    0.55
   6  -6   0    8.12    1.72
   6  -6   0    7.59    1.78
  -6   6   0   10.24    1.52
  -6   6   0    6.58    0.94
   5  -6   0   -0.52    0.79
   5  -6   0    0.20    0.95
  -5   6   0   -0.16    0.52
  -5   6   0   -0.47    0.37
   4  -6   0    0.47    0.79
   4  -6   0    0.63    0.85
  -4   6   0    1.54    0.59
  -4   6   0    0.79    0.47
   3  -6   0    1.07    0.85
   3  -6   0    0.88    0.68
   3  -6   0    1.41    0.64
  -3   6   0    1.12    0.51
   2  -6   0   12.36    1.17
   2  -6   0   11.09    1.56
   2  -6   0   10.99    1.22
  -2   6   0   11.41    1.04
  -2   6   0   10.76    0.91
   1  -6   0    3.55    0.66
   1  -6   0    4.03    0.99
   1  -6   0    3.45    0.58
  -1   6   0    2.77    0.54
  -1   6   0    3.76    0.63
   0  -6   0   39.45    1.61
   0  -6   0   37.87    1.45
   0  -6   0   41.64    2.43
   0   6   0   37.48    1.49
   0   6   0   41.76    1.78
  -1  -6   0   24.19    2.11
  -1  -6   0   22.92    1.08
  -1  -6   0   24.69    1.29
   1   6   0   21.51    1.57
   1   6   0   23.76    1.24
  -2  -6   0   42.19    2.61
  -2  -6   0   43.32    1.77
   2   6   0   41.89    1.52
   2   6   0   42.01    1.85
   2   6   0   42.15    2.19
  -3  -6   0    4.61    1.26
  -3  -6   0    5.40    0.86
   3   6   0    4.77    0.61
   3   6   0    4.79    1.09
   3   6   0    4.87    0.98
  -4  -6   0    9.96    1.46
  -4  -6   0    7.91    1.49
   4   6   0    9.45    1.45
   4   6   0   12.09    1.95
   4   6   0    9.62    0.93
  -5  -6   0    1.30    1.20
  -5  -6   0    0.51    0.79
   5   6   0    0.04    1.03
   5   6   0   -0.11    0.99
  -6  -6   0   10.50    2.21
  -6  -6   0   14.02    1.99
   6   6   0   10.08    2.11
   6   6   0   11.86    1.86
  -7  -6   0    7.97    1.57
  -7  -6   0    7.94    2.85
   7   6   0    6.93    2.35
   7   6   0   11.04    2.03
  -8  -6   0   -5.84    2.87
  -8  -6   0    0.53    1.35
   8   6   0    1.08    1.55
   8   6   0    0.35    2.50
  -9  -6   0    0.46    1.82
  -9  -6   0   -6.58    3.69
   9   6   0    1.53    1.84
   9   6   0   -0.47    3.01
   9  -7   0   -0.03    2.48
   9  -7   0   -2.60    3.07
  -9   7   0   -5.14    2.33
   8  -7   0    2.08    2.12
   8  -7   0    0.75    2.87
  -8   7   0   -1.94    1.81
   7  -7   0   -1.86    1.95
   7  -7   0    0.01    1.37
  -7   7   0   -1.56    1.02
  -7   7   0   -1.06    0.58
   6  -7   0    1.84    1.58
   6  -7   0    1.52    1.05
  -6   7   0    0.48    0.67
  -6   7   0    1.99    0.89
   5  -7   0    2.50    1.00
   5  -7   0    4.73    1.41
  -5   7   0    2.97    0.81
  -5   7   0    3.49    0.84
   4  -7   0    3.70    0.94
   4  -7   0    1.92    1.10
  -4   7   0    3.13    0.79
   3  -7   0   10.95    1.45
   3  -7   0    8.64    1.47
   3  -7   0    9.13    1.34
  -3   7   0    9.37    1.36
  -3   7   0    8.93    0.81
   2  -7   0    9.27    1.33
   2  -7   0    8.30    1.46
   2  -7   0    8.99    1.16
  -2   7   0    7.26    1.02
  -2   7   0    8.14    1.17
   1  -7   0    1.83    0.58
   1  -7   0    2.89    0.69
   1  -7   0    1.99    0.97
  -1   7   0    2.26    0.66
  -1   7   0    2.52    0.62
   0  -7   0    0.25    0.42
   0  -7   0    0.31    0.49
   0  -7   0    0.07    0.89
   0   7   0    0.31    0.46
   0   7   0   -0.02    0.61
  -1  -7   0    0.75    1.03
  -1  -7   0    0.15    0.30
  -1  -7   0    0.42    0.49
   1   7   0    0.14    0.72
   1   7   0    0.13    0.43
  -2  -7   0   -0.25    1.09
  -2  -7   0    0.06    0.52
   2   7   0    1.03    0.49
   2   7   0    0.31    0.56
   2   7   0    0.08    0.84
  -3  -7   0   26.07    1.71
  -3  -7   0   25.32    2.85
   3   7   0   24.40    1.46
   3   7   0   26.38    1.97
   3   7   0   25.00    2.24
  -4  -7   0   14.36    1.57
  -4  -7   0   12.12    1.95
   4   7   0   15.68    2.15
   4   7   0   12.89    1.18
   4   7   0   11.82    1.66
  -5  -7   0    3.80    0.98
  -5  -7   0    4.00    1.73
   5   7   0    3.31    1.41
   5   7   0    3.95    1.39
  -6  -7   0    1.09    0.89
  -6  -7   0    0.27    2.00
   6   7   0    1.52    1.66
   6   7   0    1.06    1.45
  -7  -7   0    4.99    2.93
  -7  -7   0    6.19    1.46
   7   7   0    5.96    1.92
   7   7   0    5.48    2.52
  -8  -7   0    0.24    3.77
  -8  -7   0    4.34    1.62
   8   7   0    4.18    3.13
   8   7   0    7.22    2.33
   9   7   0    0.55    1.96
   9   7   0   -2.32    3.01
   9  -8   0    0.76    2.70
   9  -8   0    0.39    3.58
   8  -8   0   -0.43    3.01
   8  -8   0    0.67    1.97
  -8   8   0   -1.96    1.95
   7  -8   0    8.73    3.00
   7  -8   0    6.09    1.87
  -7   8   0    5.71    1.80
  -7   8   0    3.85    1.10
   6  -8   0    1.00    1.83
   6  -8   0    0.61    0.91
  -6   8   0    0.12    0.83
  -6   8   0   -0.29    0.79
   5  -8   0   11.29    2.11
   5  -8   0   11.78    1.92
  -5   8   0   13.55    1.56
  -5   8   0    7.97    1.19
   4  -8   0   14.99    1.74
   4  -8   0   14.98    2.37
   4  -8   0   14.30    1.88
  -4   8   0   13.92    1.85
   3  -8   0    0.63    0.72
   3  -8   0   -0.02    0.57
   3  -8   0    1.50    1.11
  -3   8   0    1.55    0.49
  -3   8   0    1.77    0.72
   2  -8   0    0.65    0.68
   2  -8   0    0.05    0.99
   2  -8   0    0.00    0.50
  -2   8   0    0.23    0.56
  -2   8   0    0.61    0.60
   1  -8   0   15.49    1.22
   1  -8   0   16.65    1.52
   1  -8   0   14.95    2.26
  -1   8   0   16.82    1.57
  -1   8   0   14.82    1.47
   0  -8   0    3.56    0.77
   0  -8   0    3.06    1.37
   0   8   0    3.82    0.93
   0   8   0    4.18    0.78
  -1  -8   0    4.13    1.46
  -1  -8   0    3.61    0.65
  -1  -8   0    4.65    0.84
   1   8   0    4.73    1.09
   1   8   0    4.01    0.78
  -2  -8   0    9.26    0.95
  -2  -8   0    5.66    1.70
  -2  -8   0    9.26    1.31
   2   8   0    7.03    1.31
   2   8   0    9.75    1.32
  -3  -8   0    7.66    1.09
  -3  -8   0    8.22    1.85
   3   8   0    9.97    1.35
   3   8   0    7.04    1.14
   3   8   0    6.47    1.43
  -4  -8   0   -0.04    1.56
  -4  -8   0    0.22    0.63
   4   8   0   -0.29    0.92
   4   8   0    0.24    1.05
   4   8   0   -0.34    0.52
  -5  -8   0    1.82    0.86
  -5  -8   0    4.28    2.15
   5   8   0    3.50    1.40
   5   8   0    2.60    1.37
  -6  -8   0    1.55    0.92
  -6  -8   0   -0.24    2.54
   6   8   0    2.12    1.74
   6   8   0    1.36    1.62
  -7  -8   0    1.94    1.17
  -7  -8   0   -2.51    3.08
   7   8   0   -0.97    2.16
   7   8   0    1.03    1.72
  -8  -8   0   -4.34    4.06
   8   8   0    3.82    3.05
   8   8   0    4.04    2.11
  -9  -8   0   -9.07    4.50
   9   8   0   -2.82    3.12
   9   8   0    4.92    2.27
   9  -9   0   -1.01    3.58
  -9   9   0   -5.47    2.25
   8  -9   0    1.83    3.23
  -8   9   0   -0.29    1.96
   7  -9   0    1.90    1.31
   7  -9   0   -1.19    2.76
  -7   9   0    0.11    1.53
  -7   9   0   -1.10    1.00
   6  -9   0    4.10    2.40
   6  -9   0    0.43    0.91
  -6   9   0    1.36    1.15
  -6   9   0   -0.89    0.96
   5  -9   0    1.72    0.82
   5  -9   0    2.28    1.66
  -5   9   0    2.05    1.06
  -5   9   0    2.68    0.88
   4  -9   0    0.09    0.51
   4  -9   0    0.45    0.94
   4  -9   0   -0.07    1.16
  -4   9   0    0.26    0.86
   3  -9   0    7.36    1.64
   3  -9   0    8.54    1.32
   3  -9   0    7.44    1.25
  -3   9   0    8.03    1.26
   2  -9   0   16.32    1.35
   2  -9   0   15.66    2.54
   2  -9   0   17.94    1.83
  -2   9   0   15.55    1.45
  -2   9   0   19.09    2.01
   1  -9   0   18.07    2.71
   1  -9   0   16.99    1.68
  -1   9   0   16.89    1.69
  -1   9   0   19.07    1.79
   0  -9   0    0.18    0.61
   0  -9   0    0.47    1.30
   0   9   0   -0.09    0.83
   0   9   0    0.89    0.73
  -1  -9   0    4.89    0.94
  -1  -9   0    5.00    0.84
  -1  -9   0    5.29    1.69
   1   9   0    5.65    1.28
   1   9   0    4.82    0.94
  -2  -9   0   17.68    1.62
  -2  -9   0   14.99    1.25
  -2  -9   0   11.03    1.99
   2   9   0   14.99    1.66
   2   9   0   16.05    2.30
  -3  -9   0    1.04    1.63
  -3  -9   0   -0.19    0.64
   3   9   0   -0.94    1.04
   3   9   0    0.17    0.65
   3   9   0   -0.01    0.74
  -4  -9   0    0.55    0.70
  -4  -9   0   -1.34    1.73
   4   9   0    0.20    1.23
   4   9   0   -0.48    0.59
   4   9   0    0.28    0.90
  -5  -9   0    0.60    0.75
  -5  -9   0   -0.45    2.35
   5   9   0    0.13    1.41
   5   9   0   -0.41    1.15
  -6  -9   0    1.14    0.87
  -6  -9   0   -4.58    2.69
   6   9   0   -1.84    1.47
   6   9   0    0.66    1.78
  -7  -9   0    1.51    1.66
  -7  -9   0   -6.78    3.67
   7   9   0    5.17    2.27
   7   9   0   -0.45    2.25
  -8  -9   0   -7.89    4.47
   8   9   0   -4.07    2.95
   8   9   0    3.18    2.41
   8 -10   0    1.22    3.25
  -8  10   0   -3.94    1.89
   7 -10   0    0.18    2.96
  -7  10   0   -2.80    1.25
  -7  10   0   -1.27    1.71
   6 -10   0    5.47    2.59
  -6  10   0    5.42    1.62
  -6  10   0    1.03    1.37
   5 -10   0    4.93    2.31
  -5  10   0    5.90    1.32
  -5  10   0    1.27    1.35
   4 -10   0    1.66    1.46
   4 -10   0    0.39    1.16
  -4  10   0   -0.01    1.02
   3 -10   0   -0.02    0.87
   3 -10   0    0.97    1.44
  -3  10   0    0.85    0.95
   2 -10   0    8.23    1.42
   2 -10   0    5.77    1.70
  -2  10   0    6.12    1.21
  -2  10   0    6.54    0.97
   1 -10   0    9.99    1.39
   1 -10   0    7.90    1.88
  -1  10   0   10.52    1.42
  -1  10   0    8.92    1.23
   0 -10   0    3.04    0.90
   0 -10   0    3.85    1.61
   0  10   0    3.41    1.04
   0  10   0    3.48    1.13
  -1 -10   0    0.66    0.67
  -1 -10   0    0.63    1.45
   1  10   0    0.91    1.11
   1  10   0    0.10    0.77
  -2 -10   0   -0.57    1.58
  -2 -10   0    0.69    0.65
   2  10   0   -0.05    1.19
   2  10   0   -0.34    0.73
  -3 -10   0    0.66    0.60
  -3 -10   0   -0.48    1.85
   3  10   0   -0.56    0.72
   3  10   0   -0.42    1.39
  -4 -10   0    2.18    2.55
  -4 -10   0    3.29    0.92
   4  10   0    3.48    1.71
   4  10   0    2.14    1.11
   4  10   0    2.69    0.83
  -5 -10   0   -2.55    2.93
  -5 -10   0    2.22    0.90
   5  10   0    1.02    1.82
   5  10   0   -1.28    1.06
  -6 -10   0   -2.72    3.63
  -6 -10   0    1.78    0.95
   6  10   0    0.79    1.74
   6  10   0    2.05    1.98
  -7 -10   0   -6.04    4.28
   7  10   0   -1.62    2.36
   7  10   0    1.71    2.21
   8  10   0    3.85    2.48
   8  10   0   -2.25    4.53
   8 -11   0    5.08    3.88
  -8  11   0   -2.12    2.12
   7 -11   0    4.77    3.60
  -7  11   0   -1.58    1.71
  -7  11   0    2.03    1.89
   6 -11   0    1.89    3.13
  -6  11   0    3.22    1.39
  -6  11   0   -0.23    1.56
   5 -11   0    1.34    2.17
  -5  11   0    1.12    1.64
  -5  11   0    5.23    1.25
   4 -11   0    5.90    2.46
   4 -11   0    3.40    1.73
  -4  11   0    4.73    1.71
   3 -11   0    1.74    1.29
   3 -11   0    1.22    1.86
  -3  11   0    2.15    1.33
   2 -11   0    5.72    1.47
   2 -11   0    5.76    2.03
  -2  11   0    4.04    1.40
  -2  11   0    4.85    0.91
   1 -11   0    1.58    1.72
   1 -11   0    1.51    0.91
  -1  11   0    0.87    0.89
  -1  11   0    0.45    1.14
   0 -11   0    0.70    0.76
   0 -11   0    0.25    1.55
   0  11   0    0.46    1.01
   0  11   0    0.55    0.98
  -1 -11   0    2.19    2.05
  -1 -11   0    4.48    1.02
   1  11   0    4.29    1.47
   1  11   0    3.56    1.21
  -2 -11   0    5.54    1.10
  -2 -11   0    5.85    2.43
   2  11   0    5.48    1.26
   2  11   0    6.52    1.85
  -3 -11   0   -0.48    2.29
  -3 -11   0    1.36    0.78
   3  11   0    1.64    1.76
   3  11   0   -0.25    0.87
  -4 -11   0    0.01    3.14
  -4 -11   0    0.26    0.68
   4  11   0    1.55    1.96
  -5 -11   0    0.43    0.81
  -5 -11   0   -3.74    3.44
   5  11   0    1.16    2.25
  -6 -11   0   -5.09    4.40
   6  11   0    2.11    2.44
   7  11   0    4.41    2.64
   7 -12   0    5.12    3.73
  -7  12   0    4.66    2.00
   6 -12   0    3.18    3.23
  -6  12   0    4.41    1.73
   5 -12   0    2.13    3.03
  -5  12   0   -1.90    1.78
   4 -12   0    1.60    1.93
   4 -12   0    1.73    2.41
  -4  12   0   -1.14    1.87
   3 -12   0    1.37    1.59
   3 -12   0    1.87    2.36
  -3  12   0   -0.64    1.49
   2 -12   0    0.99    1.31
   2 -12   0   -1.25    1.93
  -2  12   0   -0.91    1.34
   1 -12   0    1.21    1.05
   1 -12   0    1.66    2.31
  -1  12   0    1.55    1.46
  -1  12   0    1.61    0.94
   0 -12   0   15.07    3.18
   0 -12   0   10.58    1.62
   0  12   0   13.40    1.81
   0  12   0    9.24    1.84
  -1 -12   0    1.53    2.48
  -1 -12   0    0.67    0.84
   1  12   0   -0.16    1.38
   1  12   0   -0.83    1.36
  -2 -12   0    0.61    2.84
  -2 -12   0    0.78    0.85
   2  12   0    1.32    1.80
   2  12   0    0.34    1.28
  -3 -12   0    1.52    3.45
  -3 -12   0    0.18    0.74
   3  12   0    1.44    2.03
   3  12   0   -2.23    0.93
  -4 -12   0   -4.01    3.40
  -4 -12   0    0.84    0.78
   4  12   0    1.26    2.03
  -5 -12   0   -1.81    4.26
   5  12   0    2.41    2.29
  -6 -12   0   -2.29    4.97
   6  12   0    3.31    2.71
   7  12   0    4.54    2.69
   6 -13   0    3.13    3.62
  -6  13   0   -5.84    2.26
   5 -13   0    0.83    3.06
  -5  13   0   -0.19    2.15
   4 -13   0    7.94    3.41
   4 -13   0    3.39    2.39
  -4  13   0   -0.28    2.34
   3 -13   0    5.03    3.11
   3 -13   0    3.13    2.06
  -3  13   0    0.94    2.24
   2 -13   0   -2.23    1.28
   2 -13   0    0.89    2.53
  -2  13   0   -0.40    2.02
   1 -13   0    0.75    1.20
   1 -13   0    2.34    2.87
  -1  13   0    0.97    0.93
  -1  13   0   -2.88    1.64
   0 -13   0    3.66    3.00
   0 -13   0    1.17    1.16
   0  13   0   -0.52    1.71
   0  13   0    2.27    1.29
  -1 -13   0    2.21    2.92
  -1 -13   0    1.67    1.10
   1  13   0    3.27    1.78
   1  13   0   -1.27    1.83
  -2 -13   0    0.21    3.74
  -2 -13   0    0.73    0.94
   2  13   0   -1.46    1.45
   2  13   0    2.17    2.01
  -3 -13   0    4.21    4.07
   3  13   0    2.38    2.34
  -4 -13   0    1.23    4.79
   4  13   0    7.94    2.83
  -5 -13   0   -5.31    5.09
   5  13   0    3.24    2.74
  -6 -13   0  -10.56    5.39
   6  13   0    4.53    2.58
   6 -14   0    4.65    3.67
   5 -14   0    4.20    3.65
  -5  14   0   -3.62    2.35
   4 -14   0    0.19    2.46
   4 -14   0    0.65    3.43
  -4  14   0   -2.96    2.45
   3 -14   0   -0.03    2.08
   3 -14   0    2.64    3.27
  -3  14   0   -2.24    2.33
   2 -14   0    0.07    1.71
   2 -14   0    4.19    3.52
  -2  14   0   -1.91    2.55
   1 -14   0    7.94    3.59
   1 -14   0    4.49    1.92
  -1  14   0    2.66    2.32
   0 -14   0    5.08    3.56
   0 -14   0    1.22    1.27
   0  14   0   -3.72    2.07
   0  14   0    3.80    1.55
  -1 -14   0    4.38    1.49
  -1 -14   0    6.20    3.94
   1  14   0   -1.06    2.18
   1  14   0    6.84    2.19
  -2 -14   0    3.90    4.52
  -2 -14   0    1.36    1.19
   2  14   0   -0.30    2.05
   2  14   0    3.68    2.33
  -3 -14   0    3.69    4.82
   3  14   0    5.28    2.73
  -4 -14   0    2.03    5.43
   4  14   0    4.56    2.79
  -5 -14   0  -11.38    5.37
   5  14   0    7.51    2.92
   4 -15   0   11.42    3.94
   4 -15   0    2.27    2.93
  -4  15   0   -0.53    3.05
   3 -15   0   -1.22    2.37
   3 -15   0    5.79    3.73
  -3  15   0   -5.67    2.78
   2 -15   0   -0.47    1.99
   2 -15   0    8.75    4.00
  -2  15   0   -4.76    2.53
   1 -15   0    7.09    2.45
   1 -15   0    9.64    4.25
  -1  15   0    0.03    2.64
   0 -15   0    8.32    4.38
   0 -15   0    1.31    1.61
   0  15   0   -3.01    2.45
  -1 -15   0    0.76    1.40
  -1 -15   0   11.27    4.68
   1  15   0   -3.22    2.31
   1  15   0    3.79    2.19
  -2 -15   0    8.03    4.50
   2  15   0    9.83    2.92
  -3 -15   0    8.00    5.33
   3  15   0    7.64    2.85
  -4 -15   0    0.78    5.43
   4  15   0    4.24    2.80
   3 -16   0    4.85    3.77
   3 -16   0   -1.78    2.60
   2 -16   0    0.40    2.31
   2 -16   0    8.07    3.95
   1 -16   0   -3.81    1.81
   1 -16   0   10.31    4.59
  -1  16   0   -7.14    2.99
   0 -16   0    2.37    2.07
   0 -16   0   11.46    4.75
   0  16   0   -6.80    2.95
  -1 -16   0    7.67    4.73
   1  16   0    6.78    2.67
  -2 -16   0    7.91    4.82
   2  16   0    7.03    2.82
   2  16   0   -5.29    2.63
  -3 -16   0    4.10    5.36
  -2 -16   1    8.73    4.98
   1  16  -1    8.31    3.39
  -1 -16   1   -3.42    3.68
  -1 -16   1    8.41    4.70
   0 -16   1   12.06    4.69
   1 -16   1   -1.86    2.24
   1 -16   1    9.29    4.49
   2 -16   1    7.89    4.20
   2 -16   1   -0.28    2.55
  -4 -15   1    1.18    5.60
   3  15  -1    2.94    2.87
  -3 -15   1    1.47    5.29
   2  15  -1    4.97    2.87
  -2 -15   1    0.88    1.91
  -2 -15   1    5.29    4.70
   1  15  -1   -4.40    2.44
   1  15  -1    7.81    2.53
  -1 -15   1    8.30    4.71
  -1 -15   1    1.24    1.75
   0 -15   1    9.01    4.45
   0 -15   1    0.68    1.92
  -1  15  -1   -7.08    2.81
   1 -15   1    0.84    2.12
   1 -15   1    8.47    4.14
  -2  15  -1   -5.00    2.98
   2 -15   1    5.52    4.02
   2 -15   1    3.10    2.51
  -3  15  -1   -3.36    2.80
   3 -15   1    2.29    2.73
   3 -15   1   11.00    4.06
   4 -15   1    5.36    3.81
   4 -15   1   -1.96    2.77
   5  14  -1    4.40    2.90
  -5 -14   1   -3.70    5.89
   4  14  -1    3.74    2.98
  -4 -14   1    2.36    5.26
   3  14  -1    7.60    2.95
  -3 -14   1    5.62    5.10
   2  14  -1   -2.26    2.08
   2  14  -1    5.76    2.84
  -2 -14   1    1.66    1.52
  -2 -14   1    6.51    4.74
   1  14  -1   -4.39    2.40
   1  14  -1    3.42    2.39
  -1 -14   1    8.50    4.30
  -1 -14   1    2.74    1.66
   0  14  -1    9.08    2.21
   0  14  -1    2.51    2.54
   0 -14   1   17.17    4.46
   0 -14   1    7.20    2.25
  -1  14  -1   -1.33    2.34
   1 -14   1    5.52    3.89
   1 -14   1    0.46    1.76
  -2  14  -1   -3.42    2.32
   2 -14   1   -1.96    2.03
   2 -14   1    3.58    3.46
  -3  14  -1   -3.63    2.45
   3 -14   1    5.03    3.55
   3 -14   1   -3.23    2.21
   4 -14   1    2.65    3.21
   4 -14   1   -0.52    2.60
   5 -14   1    2.04    3.46
   6  13  -1    7.07    2.94
   5  13  -1    3.14    2.88
  -5 -13   1   -2.55    5.45
   4  13  -1    2.79    2.80
  -4 -13   1    0.55    1.51
  -4 -13   1    0.51    4.92
   3  13  -1   -2.89    1.39
   3  13  -1    4.18    2.69
  -3 -13   1    1.28    1.21
  -3 -13   1    4.39    4.67
   2  13  -1    1.13    1.87
   2  13  -1    8.99    2.70
  -2 -13   1    9.44    4.18
  -2 -13   1    4.86    1.50
   1  13  -1    0.30    1.97
   1  13  -1    2.67    2.04
  -1 -13   1    4.80    3.45
  -1 -13   1    0.28    1.19
   0  13  -1    1.97    1.53
   0  13  -1   -2.29    1.94
   0 -13   1   -0.50    1.18
   0 -13   1    3.22    3.24
  -1  13  -1    2.61    2.17
  -1  13  -1    3.45    1.28
   1 -13   1    4.43    1.80
   1 -13   1    9.16    3.38
  -2  13  -1   -1.30    2.00
   2 -13   1    5.04    2.91
   2 -13   1    3.53    2.07
  -3  13  -1   -0.92    2.12
   3 -13   1    4.24    3.06
   3 -13   1    0.58    2.17
  -4  13  -1   -4.11    2.15
   4 -13   1    2.70    3.06
   4 -13   1   -0.89    2.32
  -5  13  -1   -4.14    2.22
   5 -13   1    1.20    3.34
   6 -13   1    1.44    3.23
   6  12  -1    2.59    2.69
  -6 -12   1   -9.55    5.15
   5  12  -1    5.29    2.81
  -5 -12   1   -1.90    4.92
   4  12  -1    2.97    2.56
  -4 -12   1    1.10    1.01
  -4 -12   1    1.80    4.42
   3  12  -1   -1.42    1.10
   3  12  -1   -0.95    2.11
  -3 -12   1    0.66    1.00
  -3 -12   1    3.48    3.83
   2  12  -1    1.32    2.03
   2  12  -1   -0.22    1.37
  -2 -12   1   -0.23    2.96
  -2 -12   1    1.44    1.03
   1  12  -1   10.32    2.25
   1  12  -1    7.66    1.90
  -1 -12   1   12.14    3.61
  -1 -12   1    6.30    1.48
   0  12  -1   -2.34    1.47
   0  12  -1    0.68    1.29
   0 -12   1    0.73    1.06
   0 -12   1    0.90    2.48
  -1  12  -1    3.88    1.77
  -1  12  -1    5.04    1.33
   1 -12   1    2.75    1.38
   1 -12   1    4.75    2.62
  -2  12  -1    0.80    1.70
   2 -12   1    0.77    1.47
   2 -12   1    3.42    2.63
  -3  12  -1    0.31    1.71
   3 -12   1    2.15    2.41
   3 -12   1    3.81    1.83
  -4  12  -1   -2.73    1.61
   4 -12   1   -0.24    2.72
   4 -12   1    0.30    2.03
  -5  12  -1   -3.80    1.90
   5 -12   1    3.38    2.93
  -6  12  -1   -1.27    2.23
   6 -12   1    4.31    3.37
  -7  12  -1    5.76    1.82
  -7  12  -1   -4.93    2.08
   7 -12   1    0.66    3.57
   7  11  -1    2.81    2.65
  -7 -11   1   -6.71    5.09
   6  11  -1    1.20    2.72
  -6 -11   1   -6.55    4.67
   5  11  -1    2.36    2.46
  -5 -11   1   -3.49    3.92
  -5 -11   1    0.79    0.98
   4  11  -1    2.67    2.19
  -4 -11   1    1.54    3.36
  -4 -11   1    1.44    0.94
   3  11  -1    3.94    2.10
   3  11  -1    0.98    0.98
  -3 -11   1    2.72    1.05
  -3 -11   1    3.65    3.14
   2  11  -1    2.90    1.84
   2  11  -1    0.23    0.99
  -2 -11   1    1.91    0.95
  -2 -11   1    2.97    2.62
   1  11  -1    4.56    1.42
   1  11  -1    5.49    1.73
  -1 -11   1    6.58    2.62
  -1 -11   1    4.95    1.24
   0  11  -1    2.73    1.29
   0  11  -1    1.99    1.22
   0 -11   1    2.23    1.06
   0 -11   1    3.54    2.02
  -1  11  -1    2.59    1.11
  -1  11  -1    2.08    1.36
   1 -11   1    5.03    2.19
   1 -11   1    1.82    1.09
  -2  11  -1    1.06    1.27
  -2  11  -1    2.18    0.92
   2 -11   1    2.88    2.00
   2 -11   1    1.72    1.20
  -3  11  -1   16.32    2.23
   3 -11   1   13.30    2.21
   3 -11   1   18.52    3.24
  -4  11  -1   -0.17    1.54
   4 -11   1    0.71    2.04
   4 -11   1    1.30    1.66
  -5  11  -1    0.19    1.72
   5 -11   1    1.66    2.58
  -6  11  -1   -2.50    1.63
   6 -11   1    0.58    3.09
  -7  11  -1   -3.88    1.75
   7 -11   1   -0.24    3.22
  -8  11  -1    2.44    2.22
   8 -11   1   -0.35    3.35
   8  10  -1    5.03    2.61
   7  10  -1    4.64    2.44
  -7 -10   1   -7.02    4.56
   6  10  -1    2.82    2.52
  -6 -10   1    1.40    4.00
  -6 -10   1    2.96    1.26
   5  10  -1   -1.59    1.79
  -5 -10   1   -0.49    3.24
  -5 -10   1    1.23    0.92
   4  10  -1    0.30    1.84
  -4 -10   1    0.12    2.65
  -4 -10   1    0.59    0.75
   3  10  -1    1.37    0.84
   3  10  -1    1.17    1.66
  -3 -10   1    2.80    0.93
  -3 -10   1    3.12    2.37
   2  10  -1   -0.50    0.76
   2  10  -1   -0.43    1.36
  -2 -10   1   -0.18    0.68
  -2 -10   1    1.59    1.97
   1  10  -1   -0.14    0.82
   1  10  -1   -0.25    1.19
  -1 -10   1    0.86    1.72
  -1 -10   1    0.50    0.75
   0  10  -1    1.56    0.95
   0  10  -1    1.68    1.13
   0 -10   1    1.42    0.85
   0 -10   1    2.34    1.69
  -1  10  -1    1.83    0.97
  -1  10  -1    2.38    1.03
   1 -10   1    2.96    1.00
   1 -10   1    0.86    1.46
  -2  10  -1    0.28    0.75
  -2  10  -1    0.44    0.88
   2 -10   1   -0.03    0.85
   2 -10   1    0.36    1.42
  -3  10  -1   -0.23    0.94
   3 -10   1   -0.21    1.40
   3 -10   1   -0.56    0.95
  -4  10  -1    5.95    1.47
   4 -10   1    5.03    1.60
   4 -10   1    4.55    2.03
  -5  10  -1   -0.14    1.25
   5 -10   1    1.33    2.22
  -6  10  -1    5.19    1.31
  -6  10  -1   -0.17    1.45
   6 -10   1    2.43    2.42
  -7  10  -1    0.84    1.60
  -7  10  -1    4.93    2.01
   7 -10   1    4.93    3.50
  -8  10  -1    3.96    1.89
   8 -10   1    1.38    3.40
   8   9  -1    3.33    2.30
   8   9  -1   -0.69    3.00
   7   9  -1    2.64    2.35
   7   9  -1   -0.22    2.31
  -7  -9   1   -8.40    3.83
  -7  -9   1    3.29    1.48
   6   9  -1    0.55    2.05
   6   9  -1   -0.35    1.56
  -6  -9   1    0.27    0.98
  -6  -9   1   -2.91    3.03
   5   9  -1    3.25    1.78
   5   9  -1    2.25    1.31
  -5  -9   1    1.67    2.71
  -5  -9   1    2.15    1.01
   4   9  -1    6.39    1.90
   4   9  -1    3.44    0.83
   4   9  -1    4.40    1.22
  -4  -9   1    5.57    1.14
  -4  -9   1    6.39    2.49
   3   9  -1    0.49    0.63
   3   9  -1    0.41    1.31
   3   9  -1    0.20    0.73
  -3  -9   1    0.45    0.79
  -3  -9   1    0.32    1.78
   2   9  -1    4.47    1.47
   2   9  -1    4.85    0.92
  -2  -9   1    5.13    1.77
  -2  -9   1    4.71    1.04
   1   9  -1   -0.82    1.08
   1   9  -1    0.34    0.66
  -1  -9   1    0.13    0.63
  -1  -9   1   -0.03    1.41
   0   9  -1    0.59    0.73
   0   9  -1    0.12    0.99
   0  -9   1    0.18    0.68
   0  -9   1    0.43    1.24
  -1   9  -1   14.38    1.90
  -1   9  -1   16.62    1.79
   1  -9   1   14.81    1.73
   1  -9   1   12.48    2.08
  -2   9  -1    9.42    1.27
  -2   9  -1    7.74    1.13
   2  -9   1    9.09    1.39
   2  -9   1    8.59    1.78
  -3   9  -1    2.53    0.95
  -3   9  -1    2.64    0.74
   3  -9   1    2.21    1.01
   3  -9   1    2.12    1.40
  -4   9  -1    1.93    1.00
   4  -9   1    2.46    1.51
   4  -9   1    1.84    1.15
  -5   9  -1   -0.52    0.93
   5  -9   1    0.28    1.52
  -6   9  -1    1.69    1.12
  -6   9  -1   -1.48    1.03
   6  -9   1   -0.16    2.26
  -7   9  -1    1.03    1.35
  -7   9  -1   -0.90    1.14
   7  -9   1    0.55    2.81
  -8   9  -1   -0.83    1.80
   8  -9   1   -0.07    3.45
   9  -9   1   -1.97    3.40
   8   8  -1    3.58    2.39
   8   8  -1   -1.86    2.95
  -8  -8   1    1.93    1.96
   7   8  -1    2.43    2.40
   7   8  -1    3.81    2.03
  -7  -8   1    2.69    1.46
  -7  -8   1   -5.62    3.50
   6   8  -1   -1.13    1.57
   6   8  -1    1.26    1.60
  -6  -8   1    1.10    1.00
  -6  -8   1   -1.14    2.76
   5   8  -1    3.85    1.68
   5   8  -1    3.03    1.38
  -5  -8   1    2.69    1.06
  -5  -8   1    3.73    2.39
   4   8  -1   -0.41    0.53
   4   8  -1    0.03    1.26
   4   8  -1   -0.35    0.85
  -4  -8   1   -0.46    1.58
  -4  -8   1    0.63    0.77
   3   8  -1    3.37    0.74
   3   8  -1    3.77    0.94
   3   8  -1    3.61    1.42
  -3  -8   1    4.22    0.97
  -3  -8   1    4.20    1.77
   2   8  -1    5.83    1.37
   2   8  -1    5.77    0.85
  -2  -8   1    5.62    1.04
  -2  -8   1    4.51    1.57
   1   8  -1    6.52    1.29
   1   8  -1    6.67    0.92
  -1  -8   1    6.98    1.69
  -1  -8   1    6.36    1.03
   0   8  -1   41.40    2.01
   0   8  -1   40.44    2.42
   0  -8   1   38.72    3.05
   0  -8   1   40.40    2.13
  -1   8  -1    0.51    0.81
  -1   8  -1    0.17    0.54
   1  -8   1   -0.94    0.97
   1  -8   1   -0.09    0.59
  -2   8  -1   27.15    1.86
  -2   8  -1   27.75    1.86
   2  -8   1   25.74    2.59
   2  -8   1   27.77    1.96
  -3   8  -1    2.95    0.82
  -3   8  -1    4.53    0.79
   3  -8   1    3.53    0.78
   3  -8   1    4.42    1.09
   3  -8   1    3.01    1.30
  -4   8  -1   -0.02    0.71
   4  -8   1    0.38    0.61
   4  -8   1    0.19    0.77
   4  -8   1    0.32    1.03
  -5   8  -1    2.21    0.80
  -5   8  -1    1.06    0.84
   5  -8   1    1.97    0.81
   5  -8   1    1.74    1.58
  -6   8  -1   13.41    2.04
  -6   8  -1    8.00    1.35
   6  -8   1    9.68    2.48
   6  -8   1    8.20    1.55
  -7   8  -1   -1.07    1.33
  -7   8  -1   -0.15    0.87
   7  -8   1    1.54    1.18
   7  -8   1    3.33    2.86
  -8   8  -1   -2.58    1.83
   8  -8   1    0.23    1.68
   8  -8   1   10.52    3.50
  -9   8  -1   -0.95    2.41
   9  -8   1   -1.27    3.48
   9   7  -1   -0.80    3.21
   9   7  -1    3.35    2.20
   8   7  -1    1.60    1.87
   8   7  -1    0.84    2.82
  -8  -7   1    2.22    1.69
  -8  -7   1   -4.93    3.74
   7   7  -1    0.17    1.99
   7   7  -1    2.41    1.87
  -7  -7   1   -1.47    2.87
  -7  -7   1    1.29    1.23
   6   7  -1    0.87    1.57
   6   7  -1    3.33    1.75
  -6  -7   1    0.81    2.18
  -6  -7   1    1.16    1.02
   5   7  -1   15.24    2.12
   5   7  -1   20.85    2.76
  -5  -7   1   19.01    2.05
  -5  -7   1   17.52    2.64
   4   7  -1    4.12    1.39
   4   7  -1    4.01    0.66
   4   7  -1    3.68    1.22
  -4  -7   1    3.40    0.97
  -4  -7   1    4.33    1.65
   3   7  -1   34.67    2.68
   3   7  -1   33.82    1.62
   3   7  -1   32.01    2.12
  -3  -7   1   32.67    2.03
  -3  -7   1   36.29    3.30
   2   7  -1    9.50    1.19
   2   7  -1    6.85    1.30
   2   7  -1    9.19    1.10
  -2  -7   1    6.14    1.53
  -2  -7   1    9.08    1.32
   1   7  -1    3.59    0.62
   1   7  -1    3.30    1.04
  -1  -7   1    4.44    0.83
  -1  -7   1    4.48    0.66
  -1  -7   1    2.25    1.30
   0   7  -1    0.45    0.44
   0   7  -1    0.14    0.77
   0  -7   1   -0.10    0.50
   0  -7   1   -0.75    0.91
  -1   7  -1   12.81    1.17
  -1   7  -1   12.47    1.49
   1  -7   1   10.56    1.32
   1  -7   1   10.81    1.63
  -2   7  -1   14.83    1.28
  -2   7  -1   14.40    1.39
   2  -7   1   14.00    1.99
   2  -7   1   13.63    1.03
   2  -7   1   14.18    1.47
  -3   7  -1    2.63    0.65
  -3   7  -1    2.20    0.64
   3  -7   1    2.48    0.70
   3  -7   1    1.79    0.83
   3  -7   1    1.80    1.05
  -4   7  -1   18.55    1.68
   4  -7   1   17.91    1.88
   4  -7   1   18.56    1.72
   4  -7   1   18.05    2.32
  -5   7  -1    3.10    0.80
  -5   7  -1    3.74    0.89
   5  -7   1    2.37    0.87
   5  -7   1    3.55    1.45
  -6   7  -1   -0.05    0.62
  -6   7  -1   -0.01    0.75
   6  -7   1    0.54    0.92
   6  -7   1   -0.01    1.66
  -7   7  -1    0.93    0.77
  -7   7  -1    0.51    1.26
   7  -7   1    0.75    1.23
   7  -7   1    0.91    1.95
  -8   7  -1    2.25    1.89
   8  -7   1    1.48    1.90
   8  -7   1   -1.11    2.66
   9  -7   1    0.66    2.61
   9  -7   1   -0.17    3.49
   9   6  -1   -4.74    2.73
   9   6  -1    2.16    2.11
  -9  -6   1    2.60    2.24
   8   6  -1    0.13    2.63
   8   6  -1    3.24    1.83
  -8  -6   1    2.37    1.67
   7   6  -1    4.19    2.31
   7   6  -1    7.59    1.94
  -7  -6   1    4.19    2.71
  -7  -6   1    4.23    1.46
   6   6  -1    9.27    2.24
   6   6  -1    9.80    1.89
  -6  -6   1    8.16    2.23
  -6  -6   1    7.59    1.45
   5   6  -1    8.76    1.74
   5   6  -1    9.08    1.60
  -5  -6   1    8.52    1.89
  -5  -6   1    8.99    1.38
   4   6  -1    2.15    1.13
   4   6  -1    1.79    0.50
   4   6  -1    2.75    1.06
  -4  -6   1    2.86    1.27
  -4  -6   1    2.28    0.85
   3   6  -1    3.11    0.55
   3   6  -1    2.66    1.05
   3   6  -1    3.39    0.90
  -3  -6   1    3.87    1.26
  -3  -6   1    2.96    0.87
   2   6  -1    0.57    0.36
   2   6  -1   -0.07    0.80
   2   6  -1    0.60    0.52
  -2  -6   1    0.92    1.07
  -2  -6   1    0.13    0.56
   1   6  -1    7.01    0.87
   1   6  -1    5.10    0.97
  -1  -6   1    5.86    0.85
  -1  -6   1    5.77    1.21
   0   6  -1    5.83    0.91
   0   6  -1    7.53    0.88
   0  -6   1    4.72    1.18
   0  -6   1    6.77    0.95
  -1   6  -1   25.84    1.35
  -1   6  -1   25.20    1.48
   1  -6   1   27.62    2.12
   1  -6   1   27.20    1.53
  -2   6  -1   28.87    1.45
  -2   6  -1   28.92    1.42
   2  -6   1   29.08    2.17
   2  -6   1   28.94    1.68
   2  -6   1   29.61    1.34
  -3   6  -1    1.37    0.51
  -3   6  -1    1.01    0.49
   3  -6   1    0.57    0.57
   3  -6   1    0.63    0.59
   3  -6   1    0.98    0.87
  -4   6  -1    1.45    0.58
  -4   6  -1    1.14    0.45
   4  -6   1    0.88    0.70
   4  -6   1    1.44    0.75
   4  -6   1    0.92    0.91
  -5   6  -1   21.30    1.55
  -5   6  -1   21.42    1.55
   5  -6   1   21.72    2.54
   5  -6   1   23.41    2.16
  -6   6  -1    0.47    0.66
  -6   6  -1    0.18    0.54
   6  -6   1    0.56    0.97
   6  -6   1    0.76    1.28
  -7   6  -1    0.20    0.61
  -7   6  -1   -0.11    1.01
   7  -6   1    1.66    1.29
   7  -6   1   -0.62    1.92
  -8   6  -1   -2.27    1.49
   8  -6   1   -0.35    1.84
   8  -6   1    9.33    2.79
  -9   6  -1   -5.22    2.23
   9  -6   1    4.03    2.71
   9  -6   1   -2.31    3.27
  10  -6   1   -3.42    3.60
  10  -6   1    1.17    2.99
   9   5  -1   -0.39    2.98
   9   5  -1    2.02    1.78
  -9  -5   1   -2.84    3.58
  -9  -5   1    0.89    2.61
   8   5  -1   -0.41    2.33
   8   5  -1    0.94    1.42
  -8  -5   1   -1.79    2.54
  -8  -5   1    1.89    1.98
   7   5  -1    0.91    1.30
   7   5  -1    0.70    1.77
  -7  -5   1   -0.60    1.96
  -7  -5   1    2.01    1.39
   6   5  -1   -0.30    1.29
   6   5  -1    0.37    1.16
  -6  -5   1    0.84    1.28
  -6  -5   1   -0.39    0.92
   5   5  -1    3.88    1.33
   5   5  -1    3.77    1.25
  -5  -5   1    3.51    1.24
  -5  -5   1    3.45    1.02
   4   5  -1    3.30    1.08
   4   5  -1    3.87    1.15
   4   5  -1    3.10    0.47
  -4  -5   1    4.80    1.18
  -4  -5   1    3.54    0.96
   3   5  -1   28.25    1.13
   3   5  -1   28.48    1.95
   3   5  -1   27.63    2.09
  -3  -5   1   26.49    2.25
  -3  -5   1   27.40    1.69
   2   5  -1    3.95    0.86
   2   5  -1    3.51    0.48
   2   5  -1    3.79    0.68
  -2  -5   1    4.39    0.75
  -2  -5   1    4.17    1.02
   1   5  -1   33.10    1.83
   1   5  -1   33.62    1.27
   1   5  -1   32.48    1.22
  -1  -5   1   33.31    1.51
  -1  -5   1   34.15    2.18
   0   5  -1    0.43    0.56
   0   5  -1    0.70    0.29
   0  -5   1    0.62    0.42
   0  -5   1    0.66    0.72
  -1   5  -1    0.98    0.51
  -1   5  -1    0.75    0.36
   1  -5   1   -0.10    0.66
   1  -5   1    0.81    0.44
  -2   5  -1    1.46    0.46
  -2   5  -1    1.21    0.40
   2  -5   1    0.55    0.72
   2  -5   1    1.40    0.42
   2  -5   1    1.34    0.53
  -3   5  -1    0.31    0.36
  -3   5  -1    0.06    0.33
   3  -5   1    0.44    0.50
   3  -5   1    0.07    0.49
   3  -5   1    0.14    0.62
  -4   5  -1    2.35    0.38
  -4   5  -1    2.63    0.56
   4  -5   1    1.35    0.88
   4  -5   1    2.12    0.84
   4  -5   1    1.12    0.68
  -5   5  -1    2.79    0.67
  -5   5  -1    2.61    0.61
   5  -5   1    2.15    0.99
   5  -5   1    2.72    1.11
  -6   5  -1    1.17    0.57
  -6   5  -1    1.05    0.66
   6  -5   1    1.57    1.05
   6  -5   1    2.29    1.37
  -7   5  -1    0.50    0.55
  -7   5  -1    1.53    1.14
   7  -5   1    2.16    1.47
   7  -5   1    2.84    1.93
  -8   5  -1   -0.33    1.45
   8  -5   1   -0.91    1.72
   8  -5   1   -1.87    2.06
  -9   5  -1   -2.39    2.17
   9  -5   1    0.02    2.94
   9  -5   1    2.60    2.74
  10  -5   1    1.31    3.02
  10  -5   1   -2.85    3.65
  10   4  -1   -1.76    3.10
 -10  -4   1   -6.75    3.22
   9   4  -1   -1.20    2.82
   9   4  -1    1.10    1.43
  -9  -4   1    1.59    2.70
  -9  -4   1   -5.60    3.14
   8   4  -1   -0.30    2.32
   8   4  -1    0.35    1.25
  -8  -4   1   -1.17    1.87
  -8  -4   1   -3.75    2.22
   7   4  -1    2.03    2.02
   7   4  -1    3.89    1.33
  -7  -4   1    5.04    1.60
  -7  -4   1    4.35    2.02
   6   4  -1    0.45    0.97
   6   4  -1    0.22    1.26
  -6  -4   1    0.13    0.95
  -6  -4   1    0.00    0.93
   5   4  -1    1.01    0.95
   5   4  -1    0.12    0.98
  -5  -4   1    0.50    0.86
  -5  -4   1    0.59    0.85
   4   4  -1   14.14    1.89
   4   4  -1   12.86    0.72
   4   4  -1   15.19    1.92
  -4  -4   1   14.38    1.56
  -4  -4   1   14.52    1.67
   3   4  -1   -0.18    0.55
   3   4  -1    0.01    0.22
   3   4  -1    0.28    0.67
  -3  -4   1   -0.49    0.52
  -3  -4   1    0.24    0.59
   2   4  -1    1.79    0.58
   2   4  -1    1.95    0.66
   2   4  -1    1.60    0.29
  -2  -4   1    2.36    0.78
  -2  -4   1    2.18    0.60
   1   4  -1   64.58    2.15
   1   4  -1   62.46    1.56
   1   4  -1   61.49    1.70
  -1  -4   1   62.00    2.48
  -1  -4   1   63.53    1.92
   0   4  -1   76.13    2.11
   0   4  -1   73.19    1.79
   0  -4   1   76.57    2.70
   0  -4   1   74.82    2.05
  -1   4  -1   29.26    1.19
  -1   4  -1   27.02    1.08
   1  -4   1   27.94    1.28
   1  -4   1   25.67    1.65
  -2   4  -1    0.12    0.23
  -2   4  -1    0.45    0.29
   2  -4   1    0.16    0.37
   2  -4   1   -0.11    0.34
   2  -4   1    0.16    0.57
  -3   4  -1    1.32    0.26
  -3   4  -1    1.86    0.40
   3  -4   1    1.18    0.68
   3  -4   1    1.43    0.53
   3  -4   1    1.41    0.58
  -4   4  -1   -0.02    0.17
  -4   4  -1   -0.35    0.29
  -4   4  -1    0.24    0.33
   4  -4   1    0.01    0.62
   4  -4   1    0.26    0.61
  -5   4  -1    3.12    0.68
  -5   4  -1    2.31    0.53
   5  -4   1    2.69    1.08
   5  -4   1    2.58    0.97
  -6   4  -1    2.18    0.73
  -6   4  -1    1.41    0.53
   6  -4   1    3.09    1.27
   6  -4   1    1.40    1.11
  -7   4  -1    3.79    1.23
  -7   4  -1    1.87    0.63
   7  -4   1    3.59    1.86
   7  -4   1    2.91    1.64
  -8   4  -1    2.38    1.72
   8  -4   1    3.84    2.05
   8  -4   1    3.68    2.49
  -9   4  -1   -3.89    2.03
   9  -4   1   -0.10    3.04
   9  -4   1   -0.61    2.50
  10  -4   1   -0.76    2.96
  10   3  -1   -1.21    3.17
 -10  -3   1   -6.35    3.19
 -10  -3   1   -7.10    3.39
   9   3  -1    1.44    1.24
   9   3  -1    1.89    2.97
  -9  -3   1   -4.09    2.76
  -9  -3   1   -0.33    2.73
   8   3  -1    1.80    1.18
   8   3  -1    0.87    2.34
  -8  -3   1    2.54    2.06
  -8  -3   1    0.83    2.16
   7   3  -1    1.76    1.67
   7   3  -1    1.48    1.02
  -7  -3   1    0.43    1.27
  -7  -3   1    1.33    1.30
   6   3  -1    5.15    1.50
   6   3  -1    6.02    1.25
  -6  -3   1    6.57    1.28
  -6  -3   1    5.69    1.40
   5   3  -1   -0.28    0.79
   5   3  -1    0.40    0.90
  -5  -3   1    0.61    0.64
  -5  -3   1    0.54    0.79
   4   3  -1    8.16    1.27
   4   3  -1    8.63    1.16
  -4  -3   1   11.47    1.37
  -4  -3   1   10.29    1.35
   3   3  -1    0.23    0.54
   3   3  -1    0.26    0.18
   3   3  -1    0.19    0.55
  -3  -3   1    0.29    0.47
  -3  -3   1    0.33    0.50
   2   3  -1   28.49    1.56
   2   3  -1   28.05    1.46
   2   3  -1   28.02    0.83
  -2  -3   1   28.58    1.57
  -2  -3   1   27.55    1.32
   1   3  -1   10.54    1.15
   1   3  -1   11.18    0.61
   1   3  -1   10.80    0.82
  -1  -3   1   10.68    0.93
  -1  -3   1   11.17    1.29
   0   3  -1    0.78    0.44
   0   3  -1    0.47    0.22
   0  -3   1    0.58    0.61
   0  -3   1    0.23    0.34
  -1   3  -1    6.90    0.57
  -1   3  -1    8.27    0.69
  -1   3  -1    5.93    0.75
   1  -3   1    6.43    0.56
   1  -3   1    6.29    0.72
   1  -3   1    5.57    0.84
  -2   3  -1    2.18    0.35
  -2   3  -1    2.51    0.37
   2  -3   1    2.42    0.50
   2  -3   1    2.34    0.52
   2  -3   1    1.70    0.56
  -3   3  -1   87.31    2.01
   3  -3   1   85.36    2.48
   3  -3   1   83.65    2.95
   3  -3   1   93.07    2.83
  -4   3  -1    4.28    0.64
  -4   3  -1    5.67    0.69
   4  -3   1    5.04    1.01
   4  -3   1    5.46    0.47
   4  -3   1    4.07    0.92
  -5   3  -1   25.28    1.50
  -5   3  -1   26.13    1.23
   5  -3   1   25.87    2.18
   5  -3   1   23.77    2.17
   5  -3   1   27.22    0.98
  -6   3  -1    8.95    1.22
  -6   3  -1    6.64    0.95
   6  -3   1    6.27    1.48
   6  -3   1    5.75    1.43
   6  -3   1    7.80    0.72
  -7   3  -1    1.82    0.97
   7  -3   1    2.03    1.48
   7  -3   1    1.52    1.46
  -8   3  -1   -0.33    1.46
   8  -3   1   -1.14    2.01
   8  -3   1   -0.05    1.88
  -9   3  -1   -2.61    2.14
   9  -3   1    4.53    2.74
   9  -3   1   -0.59    2.96
  10   2  -1   -2.13    3.00
 -10  -2   1   -3.05    3.08
   9   2  -1    0.05    2.71
  -9  -2   1   -2.39    2.35
  -9  -2   1   -1.88    2.67
   8   2  -1    0.59    0.86
   8   2  -1    1.34    2.10
  -8  -2   1   -1.65    1.72
  -8  -2   1    0.69    1.82
   7   2  -1    0.08    1.33
   7   2  -1    0.96    0.82
  -7  -2   1    0.47    1.02
  -7  -2   1   -0.13    1.18
   6   2  -1    0.56    0.75
   6   2  -1    0.45    1.05
  -6  -2   1    0.58    0.65
  -6  -2   1   -0.04    0.83
   5   2  -1    0.45    0.89
   5   2  -1    0.11    0.67
  -5  -2   1    0.48    0.57
  -5  -2   1    1.01    0.76
   4   2  -1    9.32    1.53
   4   2  -1    9.29    1.30
  -4  -2   1    9.52    1.12
  -4  -2   1    9.91    1.25
   3   2  -1   -0.23    0.51
   3   2  -1   -0.39    0.47
   3   2  -1    0.06    0.12
   3   2  -1    0.18    0.11
  -3  -2   1    0.44    0.47
  -3  -2   1    0.38    0.38
   2   2  -1    0.05    0.49
   2   2  -1   -0.06    0.11
   2   2  -1   -0.24    0.45
  -2  -2   1    0.10    0.43
  -2  -2   1    0.62    0.40
   1   2  -1   56.84    1.15
   1   2  -1   56.85    1.59
   1   2  -1   54.67    1.63
  -1  -2   1   54.23    1.77
  -1  -2   1   54.56    1.53
   0   2  -1  540.22    8.18
   0   2  -1  550.46    9.06
   0  -2   1  517.33    8.44
   0  -2   1  527.55    8.61
  -1   2  -1   63.62    1.37
  -1   2  -1   61.85    1.27
   1  -2   1   67.39    1.47
   1  -2   1   63.41    1.93
   1  -2   1   63.05    1.60
  -2   2  -1   14.19    0.66
   2  -2   1   14.05    1.03
   2  -2   1   14.42    0.94
   2  -2   1   13.10    0.49
   2  -2   1   13.31    1.13
  -3   2  -1    7.29    0.68
  -3   2  -1    7.89    0.55
   3  -2   1    6.98    1.06
   3  -2   1    7.85    0.48
   3  -2   1    6.90    1.03
  -4   2  -1   14.05    0.77
  -4   2  -1   14.47    0.99
   4  -2   1   14.97    1.49
   4  -2   1   15.27    1.56
   4  -2   1   13.84    0.72
  -5   2  -1   12.91    0.88
  -5   2  -1   12.86    1.15
   5  -2   1   12.46    0.86
   5  -2   1   14.35    1.89
   5  -2   1   12.94    1.89
  -6   2  -1    9.84    1.30
  -6   2  -1    7.90    0.89
   6  -2   1    7.60    1.55
   6  -2   1    8.29    0.89
   6  -2   1    8.00    1.51
  -7   2  -1   10.35    1.48
   7  -2   1    9.26    2.03
   7  -2   1    9.77    2.07
  -8   2  -1   -1.22    1.33
   8  -2   1    2.18    1.95
   8  -2   1    0.15    1.99
  -9   2  -1   -2.09    2.16
   9  -2   1   -1.03    2.36
  10   1  -1   -0.03    2.87
 -10  -1   1   -4.38    2.55
   9   1  -1    4.09    2.79
  -9  -1   1   -1.27    2.64
  -9  -1   1    1.77    2.40
   8   1  -1    0.66    1.86
   8   1  -1    0.46    0.71
  -8  -1   1    0.03    1.92
  -8  -1   1   -0.41    1.37
   7   1  -1    0.22    0.70
   7   1  -1   -0.57    1.20
  -7  -1   1   -0.12    0.79
  -7  -1   1   -0.16    1.08
   6   1  -1    0.71    1.03
   6   1  -1    1.04    0.70
  -6  -1   1    0.80    0.85
  -6  -1   1    0.71    0.69
   5   1  -1   10.47    1.40
   5   1  -1    6.94    1.31
  -5  -1   1   10.19    1.26
  -5  -1   1   11.91    1.45
   4   1  -1   34.28    1.66
   4   1  -1   32.60    2.18
  -4  -1   1   33.13    1.71
  -4  -1   1   32.85    1.64
   3   1  -1   26.87    1.32
   3   1  -1   25.73    1.70
  -3  -1   1   26.43    1.30
  -3  -1   1   27.89    1.36
   2   1  -1    7.65    0.89
   2   1  -1    7.36    1.05
   2   1  -1    6.83    0.34
  -2  -1   1    7.96    0.30
  -2  -1   1    7.77    0.70
  -2  -1   1    8.49    0.82
   1   1  -1   97.71    2.15
   1   1  -1   89.33    1.87
   1   1  -1   87.58    1.41
  -1  -1   1   90.02    1.97
  -1  -1   1   92.25    1.40
  -1  -1   1   88.70    1.83
   0   1  -1   -1.04    0.15
   0   1  -1   -0.84    0.12
   0   1  -1   -0.88    0.15
   0  -1   1   -0.51    0.21
   0  -1   1   -0.74    0.12
   0  -1   1   -0.89    0.16
   0  -1   1   -0.64    0.17
  -1   1  -1  175.31    2.58
   1  -1   1  174.45    2.92
   1  -1   1  177.94    2.55
   1  -1   1  174.68    3.15
   1  -1   1  176.72    3.31
   1  -1   1  189.65    3.15
  -2   1  -1   18.82    0.62
   2  -1   1   17.39    1.12
   2  -1   1   19.00    0.65
   2  -1   1   19.25    0.93
   2  -1   1   19.65    1.12
  -3   1  -1    3.30    0.36
  -3   1  -1    2.52    0.41
   3  -1   1    3.51    0.45
   3  -1   1    2.98    0.67
   3  -1   1    2.53    0.61
  -4   1  -1    6.82    0.76
  -4   1  -1    6.45    0.52
   4  -1   1    5.38    0.97
   4  -1   1    6.36    0.65
   4  -1   1    4.81    0.94
  -5   1  -1    0.04    0.38
  -5   1  -1    0.23    0.27
   5  -1   1   -0.32    0.33
   5  -1   1   -0.50    0.72
   5  -1   1   -0.38    0.71
  -6   1  -1    0.80    0.58
  -6   1  -1    0.06    0.31
   6  -1   1    0.70    0.46
   6  -1   1    0.00    0.90
   6  -1   1    0.82    1.06
  -7   1  -1    0.06    0.80
   7  -1   1   -0.22    1.12
   7  -1   1   -0.75    1.25
   7  -1   1    0.63    0.46
  -8   1  -1    0.55    1.44
   8  -1   1    3.80    1.97
  -9   1  -1   -0.13    2.28
   9  -1   1    2.18    2.75
 -10   1  -1   10.28    2.03
  10  -1   1    1.83    3.01
  10   0  -1    1.19    2.97
 -10   0   1    4.24    2.35
   9   0  -1    4.48    2.67
  -9   0   1    6.22    2.25
  -9   0   1   -2.25    2.72
   8   0  -1    2.63    1.87
  -8   0   1    1.02    1.98
  -8   0   1    3.21    1.64
   7   0  -1    0.74    1.28
   7   0  -1    0.59    0.60
  -7   0   1    0.45    0.77
  -7   0   1   -0.16    1.05
   6   0  -1    3.18    0.77
   6   0  -1    2.41    1.15
  -6   0   1    3.42    0.92
  -6   0   1    2.26    0.78
   5   0  -1   34.34    1.70
   5   0  -1   32.49    2.49
   5   0  -1   34.48    2.42
  -5   0   1   33.94    1.87
   4   0  -1    3.87    0.87
   4   0  -1    2.76    0.84
   4   0  -1    3.90    0.64
  -4   0   1    3.63    0.65
   3   0  -1    3.95    0.55
   3   0  -1    4.03    0.79
   3   0  -1    4.52    0.76
   3   0  -1    4.30    0.30
  -3   0   1    4.91    0.71
  -3   0   1    4.16    0.29
   2   0  -1    2.69    0.45
   2   0  -1    3.07    0.58
   2   0  -1    3.18    0.34
   2   0  -1    2.53    0.67
  -2   0   1    2.52    0.28
  -2   0   1    3.30    0.46
   1   0  -1  259.19    3.64
   1   0  -1  277.31    4.65
   1   0  -1  253.21    4.53
   1   0  -1  263.23    4.03
  -1   0   1  263.64    4.25
  -1   0   1  222.26    4.16
  -1   0   1  258.27    3.86
  -1   0  -1   80.85    1.46
  -1   0  -1   90.75    1.36
   1   0   1   87.85    1.48
   1   0   1   94.12    1.88
   1   0   1   88.61    1.82
   1   0   1   90.63    1.56
   1   0   1   92.40    1.36
  -2   0  -1  107.93    2.03
   2   0   1  104.72    1.95
   2   0   1  106.84    1.64
   2   0   1  107.79    2.66
   2   0   1  102.51    2.55
  -3   0  -1    0.19    0.23
  -3   0  -1    0.00    0.11
   3   0   1   -0.11    0.43
   3   0   1    0.07    0.26
   3   0   1   -0.24    0.45
  -4   0  -1    6.16    0.72
  -4   0  -1    5.53    0.41
   4   0   1    5.21    0.93
   4   0   1    5.38    0.69
   4   0   1    4.90    0.93
  -5   0  -1    7.63    0.99
  -5   0  -1    4.84    0.49
   5   0   1    4.83    1.13
   5   0   1    4.88    0.69
   5   0   1    4.45    1.12
  -6   0  -1    2.70    0.75
   6   0   1    2.76    1.24
   6   0   1    2.10    1.10
   6   0   1    2.63    0.62
  -7   0  -1    0.44    0.84
  -7   0  -1    0.59    0.68
   7   0   1   -0.06    0.50
   7   0   1    0.02    1.17
  -8   0  -1   -1.26    1.30
  -8   0  -1    1.82    1.02
   8   0   1   -1.54    1.42
  -9   0  -1    4.24    1.78
  -9   0  -1   -3.97    2.06
   9   0   1    1.77    2.44
 -10   0  -1    4.44    2.21
  10   0   1    1.67    3.27
  10  -1  -1    2.73    3.30
 -10   1   1   -6.41    3.35
   9  -1  -1    4.26    2.75
  -9   1   1    5.76    1.75
   8  -1  -1   -0.72    1.68
  -8   1   1   -1.61    1.56
   7  -1  -1    3.73    0.78
   7  -1  -1    3.33    1.64
   7  -1  -1    4.23    1.67
  -7   1   1    2.97    1.27
   6  -1  -1    9.89    1.75
   6  -1  -1    7.48    1.55
   6  -1  -1   10.71    1.17
  -6   1   1   11.29    1.69
   5  -1  -1    4.73    1.21
   5  -1  -1    7.01    0.93
   5  -1  -1    6.36    1.25
  -5   1   1    5.23    0.86
  -5   1   1    5.89    0.55
   4  -1  -1   10.88    1.42
   4  -1  -1   10.17    0.85
   4  -1  -1    9.45    1.51
  -4   1   1   10.39    0.98
  -4   1   1   10.06    0.57
   3  -1  -1    0.23    0.29
   3  -1  -1    0.29    0.48
   3  -1  -1    0.07    0.51
  -3   1   1    0.22    0.20
  -3   1   1    0.35    0.30
   2  -1  -1  164.68    3.83
   2  -1  -1  154.61    3.44
   2  -1  -1  164.02    2.62
  -2   1   1  158.40    2.92
  -2   1   1  156.53    2.41
   1  -1  -1   87.86    2.12
   1  -1  -1   88.20    1.92
   1  -1  -1   86.10    1.43
   1  -1  -1   91.17    1.39
  -1   1   1   90.31    1.44
  -1   1   1   88.28    1.63
  -1   1   1   87.30    1.35
  -1  -1  -1   71.76    1.54
  -1  -1  -1   69.97    1.09
  -1  -1  -1   73.43    1.16
   1   1   1   73.83    1.39
   1   1   1   69.54    1.15
   1   1   1   71.59    1.65
   1   1   1   72.23    1.11
  -2  -1  -1  193.60    3.80
  -2  -1  -1  196.14    3.17
   2   1   1  204.60    2.69
   2   1   1  201.21    4.14
   2   1   1  194.81    3.35
  -3  -1  -1    3.82    0.64
  -3  -1  -1    4.03    0.57
   3   1   1    3.38    0.50
   3   1   1    3.46    0.71
  -4  -1  -1    1.81    0.50
  -4  -1  -1    2.14    0.47
   4   1   1    2.60    0.77
   4   1   1    2.18    0.53
  -5  -1  -1    2.02    0.61
  -5  -1  -1    0.93    0.57
   5   1   1    1.34    0.56
   5   1   1    0.57    0.80
  -6  -1  -1   18.62    1.64
  -6  -1  -1   17.14    1.64
   6   1   1   15.33    2.42
   6   1   1   19.51    1.53
  -7  -1  -1    0.35    0.85
  -7  -1  -1    1.04    0.81
   7   1   1   -0.44    1.11
   7   1   1    1.25    0.69
  -8  -1  -1   -1.45    1.23
  -8  -1  -1    1.34    1.33
   8   1   1    1.19    0.76
   8   1   1    1.85    1.82
  -9  -1  -1    0.07    1.68
  -9  -1  -1   -2.87    2.09
   9   1   1   -1.24    2.10
 -10  -1  -1    2.23    2.37
  10   1   1    0.75    2.81
  10  -2  -1   -2.61    2.82
   9  -2  -1   -0.46    2.45
   8  -2  -1   -0.10    1.85
   8  -2  -1   -0.52    2.23
  -8   2   1   -1.00    1.63
   7  -2  -1   -0.09    1.48
   7  -2  -1    0.39    1.20
  -7   2   1   -0.24    0.97
   6  -2  -1   29.99    2.99
   6  -2  -1   35.30    2.95
   6  -2  -1   34.89    1.48
  -6   2   1   36.46    2.15
  -6   2   1   32.82    1.17
   5  -2  -1    2.76    1.10
   5  -2  -1    2.91    1.02
   5  -2  -1    2.18    0.49
  -5   2   1    2.29    0.43
  -5   2   1    2.48    0.64
   4  -2  -1    5.29    1.00
   4  -2  -1    4.72    1.04
   4  -2  -1    5.55    0.59
  -4   2   1    6.26    0.66
  -4   2   1    5.19    0.79
   3  -2  -1    0.13    0.21
   3  -2  -1    0.11    0.47
   3  -2  -1   -0.18    0.52
  -3   2   1    0.04    0.26
  -3   2   1    0.01    0.24
   2  -2  -1   60.49    2.19
   2  -2  -1   59.24    2.02
  -2   2   1   60.47    1.38
  -2   2   1   60.25    1.59
  -2   2   1   61.60    1.07
   1  -2  -1  338.76    5.95
   1  -2  -1  357.96    6.12
  -1   2   1  347.98    5.43
  -1   2   1  344.62    6.38
   0  -2  -1  148.30    3.00
   0  -2  -1  160.05    2.95
   0  -2  -1  156.32    2.38
   0   2   1  164.41    2.63
   0   2   1  150.89    2.38
   0   2   1  158.66    2.92
   0   2   1  165.45    2.73
  -1  -2  -1    7.17    0.38
  -1  -2  -1    7.07    0.63
  -1  -2  -1    6.93    0.36
   1   2   1    7.56    0.60
   1   2   1    7.49    0.39
   1   2   1    7.04    0.39
   1   2   1    7.73    0.56
  -2  -2  -1    7.28    0.38
  -2  -2  -1    8.01    0.79
  -2  -2  -1    8.15    0.65
   2   2   1    7.65    0.41
   2   2   1    8.21    0.94
   2   2   1    7.55    0.80
  -3  -2  -1    8.26    0.73
  -3  -2  -1    7.72    0.82
   3   2   1    7.83    0.86
   3   2   1    7.51    1.09
  -4  -2  -1   31.88    1.40
  -4  -2  -1   30.87    1.67
   4   2   1   31.06    1.50
   4   2   1   30.37    2.02
  -5  -2  -1    2.66    0.68
  -5  -2  -1    2.93    0.74
   5   2   1    2.29    0.93
   5   2   1    2.35    0.71
  -6  -2  -1    1.86    0.81
  -6  -2  -1    1.72    0.75
   6   2   1    0.97    1.02
   6   2   1    0.91    0.73
  -7  -2  -1    6.40    1.44
  -7  -2  -1    6.49    1.29
   7   2   1    6.64    1.14
   7   2   1    6.39    1.75
  -8  -2  -1   -0.51    1.38
  -8  -2  -1    1.40    1.41
   8   2   1   -1.66    1.56
   8   2   1    0.74    0.82
  -9  -2  -1   -1.13    2.11
  -9  -2  -1   -3.37    2.04
   9   2   1   -1.61    2.23
 -10  -2  -1   -5.91    2.86
 -10  -2  -1   -2.37    2.70
  10   2   1    3.00    2.95
  10  -3  -1    2.22    3.15
   9  -3  -1    0.14    3.01
   9  -3  -1    3.06    2.70
  -9   3   1   -1.26    2.62
   8  -3  -1    0.08    2.09
   8  -3  -1    3.45    2.54
  -8   3   1    3.34    1.97
   7  -3  -1    4.26    1.71
   7  -3  -1    5.65    1.92
  -7   3   1    5.53    1.32
   6  -3  -1   -0.61    0.96
   6  -3  -1    0.64    1.09
  -6   3   1   -0.08    0.41
  -6   3   1    0.22    0.59
   5  -3  -1   14.30    2.08
   5  -3  -1   14.69    0.80
   5  -3  -1   17.74    2.00
  -5   3   1   17.06    1.36
  -5   3   1   14.48    1.05
   4  -3  -1    4.46    0.45
   4  -3  -1    4.24    0.94
   4  -3  -1    3.70    0.97
  -4   3   1    3.67    0.52
  -4   3   1    5.17    0.78
   3  -3  -1   -0.45    0.55
   3  -3  -1    0.17    0.50
  -3   3   1    0.31    0.29
  -3   3   1    0.05    0.27
   2  -3  -1   18.83    1.33
   2  -3  -1   21.96    1.44
  -2   3   1   20.77    0.94
  -2   3   1   21.47    0.93
   1  -3  -1   32.96    0.73
   1  -3  -1   29.43    1.50
   1  -3  -1   32.22    1.43
   1  -3  -1   31.07    1.12
  -1   3   1   31.13    0.68
  -1   3   1   32.29    1.07
   0  -3  -1    3.92    0.61
   0  -3  -1    2.46    0.59
   0  -3  -1    3.30    0.43
   0   3   1    3.64    0.51
   0   3   1    3.03    0.37
  -1  -3  -1   15.72    1.17
  -1  -3  -1   14.42    0.67
   1   3   1   14.12    0.92
   1   3   1   14.22    0.88
   1   3   1   14.92    0.70
  -2  -3  -1    4.49    0.52
  -2  -3  -1    5.66    0.91
   2   3   1    5.02    0.50
   2   3   1    4.31    0.68
   2   3   1    3.55    0.59
  -3  -3  -1   22.98    1.12
  -3  -3  -1   24.20    1.48
   3   3   1   24.58    1.40
   3   3   1   23.97    1.62
   3   3   1   24.70    0.66
  -4  -3  -1    8.52    1.06
  -4  -3  -1    9.02    1.16
   4   3   1    6.39    1.13
   4   3   1    7.28    1.06
  -5  -3  -1    0.77    0.62
  -5  -3  -1    0.56    0.66
   5   3   1    0.18    0.62
   5   3   1    0.54    0.84
  -6  -3  -1    0.12    0.68
  -6  -3  -1    1.18    0.81
   6   3   1    0.54    0.74
   6   3   1    0.45    0.99
  -7  -3  -1    0.46    0.95
  -7  -3  -1   -0.25    0.92
   7   3   1   -0.72    1.28
   7   3   1    0.27    0.77
  -8  -3  -1   -1.71    1.21
  -8  -3  -1   -1.98    1.45
   8   3   1   -0.45    1.72
   8   3   1    1.40    0.98
  -9  -3  -1    0.76    2.25
  -9  -3  -1    3.68    2.73
   9   3   1    3.85    2.73
   9   3   1    2.90    1.23
  10   3   1    3.35    3.08
  10  -4  -1    1.27    2.95
  10  -4  -1   -2.70    3.51
   9  -4  -1   -0.60    3.09
   9  -4  -1    0.73    2.51
  -9   4   1   -1.87    2.48
   8  -4  -1    1.79    2.55
   8  -4  -1    3.51    2.37
  -8   4   1    0.09    1.82
   7  -4  -1    3.39    1.74
   7  -4  -1    3.85    1.97
  -7   4   1    1.65    1.13
   6  -4  -1    2.82    1.38
   6  -4  -1    3.10    1.34
  -6   4   1    2.63    0.59
  -6   4   1    2.59    0.84
   5  -4  -1   28.18    2.41
   5  -4  -1   25.60    2.49
  -5   4   1   26.03    1.63
  -5   4   1   27.39    1.46
   4  -4  -1    7.15    1.21
   4  -4  -1    5.84    1.14
  -4   4   1    8.57    0.94
  -4   4   1    8.25    0.91
   3  -4  -1   23.43    1.73
   3  -4  -1   23.21    1.72
  -3   4   1   23.11    1.16
  -3   4   1   22.10    1.18
   2  -4  -1    1.58    0.58
   2  -4  -1    1.39    0.60
  -2   4   1    1.34    0.37
   1  -4  -1   78.76    2.28
   1  -4  -1   73.19    2.56
   1  -4  -1   78.16    1.99
  -1   4   1   79.18    1.54
  -1   4   1   76.78    1.86
   0  -4  -1    0.28    0.65
   0  -4  -1    1.63    0.47
   0  -4  -1    1.43    0.35
   0   4   1    1.50    0.36
   0   4   1    1.15    0.41
  -1  -4  -1    1.12    0.34
  -1  -4  -1    1.32    0.69
   1   4   1    1.03    0.49
   1   4   1    1.14    0.34
   1   4   1    1.26    0.42
  -2  -4  -1   39.68    1.93
  -2  -4  -1   41.96    1.33
   2   4   1   42.74    1.71
   2   4   1   40.29    1.70
   2   4   1   38.73    1.14
  -3  -4  -1   21.66    1.57
  -3  -4  -1   20.13    1.17
   3   4   1   23.08    1.58
   3   4   1   23.16    1.51
   3   4   1   20.75    0.79
  -4  -4  -1    2.25    0.63
  -4  -4  -1    1.89    0.75
   4   4   1    1.89    0.83
   4   4   1    1.46    0.68
  -5  -4  -1    0.38    0.71
  -5  -4  -1    0.25    0.67
   5   4   1   -0.59    0.69
   5   4   1    0.09    0.87
  -6  -4  -1   23.27    2.46
  -6  -4  -1   22.86    1.96
   6   4   1   19.92    2.74
   6   4   1   24.43    2.14
  -7  -4  -1    2.77    1.13
  -7  -4  -1    5.38    1.62
   7   4   1    2.72    1.13
   7   4   1    2.36    1.66
  -8  -4  -1   -1.39    1.79
  -8  -4  -1   -0.91    1.28
   8   4   1    1.03    1.01
   8   4   1   -0.10    2.10
  -9  -4  -1   -2.97    2.62
  -9  -4  -1   -0.57    2.02
   9   4   1    1.68    1.27
   9   4   1    0.93    2.57
  10   4   1   -0.60    3.06
  10  -5  -1    4.36    3.30
  10  -5  -1    2.22    3.70
 -10   5   1   -4.13    3.02
   9  -5  -1    1.21    2.72
   9  -5  -1    0.49    3.41
  -9   5   1   -4.46    2.36
   8  -5  -1    1.77    2.03
   8  -5  -1    0.59    2.54
  -8   5   1   -0.40    1.79
   7  -5  -1   -1.05    1.41
   7  -5  -1    0.16    1.67
  -7   5   1   -0.12    1.11
   6  -5  -1    0.84    1.26
   6  -5  -1    0.93    1.19
  -6   5   1    1.13    0.59
  -6   5   1    0.52    0.63
   5  -5  -1   -0.11    0.85
   5  -5  -1    0.21    0.84
  -5   5   1   -0.38    0.36
  -5   5   1   -0.28    0.48
   4  -5  -1    8.31    1.35
   4  -5  -1    7.66    1.27
  -4   5   1    9.17    1.18
  -4   5   1    9.18    0.99
   3  -5  -1    6.36    1.04
   3  -5  -1    6.73    1.11
  -3   5   1    8.03    0.96
  -3   5   1    6.75    0.76
   2  -5  -1    6.39    0.89
   2  -5  -1    6.58    1.11
   2  -5  -1    5.70    1.02
  -2   5   1    7.53    0.84
   1  -5  -1    3.69    0.56
   1  -5  -1    3.63    0.82
   1  -5  -1    3.78    0.68
  -1   5   1    3.90    0.46
  -1   5   1    2.72    0.46
   0  -5  -1    0.42    0.41
   0  -5  -1   -0.05    0.63
   0  -5  -1    0.03    0.27
   0   5   1    0.11    0.31
   0   5   1   -0.07    0.39
  -1  -5  -1    5.04    0.98
  -1  -5  -1    5.81    0.63
  -1  -5  -1    6.38    0.66
   1   5   1    5.38    0.74
   1   5   1    7.62    0.77
  -2  -5  -1    2.86    0.52
  -2  -5  -1    2.18    0.82
   2   5   1    2.70    0.69
   2   5   1    2.51    0.62
   2   5   1    2.39    0.43
  -3  -5  -1   21.37    1.81
  -3  -5  -1   23.21    1.28
   3   5   1   22.10    0.98
   3   5   1   22.54    1.63
   3   5   1   21.98    1.68
  -4  -5  -1    1.34    0.66
  -4  -5  -1    1.38    0.79
   4   5   1    1.17    0.36
   4   5   1    1.56    0.82
   4   5   1    1.58    0.87
  -5  -5  -1    1.18    0.87
  -5  -5  -1    0.93    0.73
   5   5   1    0.73    0.86
   5   5   1    1.49    1.06
  -6  -5  -1    0.69    1.04
  -6  -5  -1    1.13    0.84
   6   5   1    0.48    1.19
   6   5   1    1.15    0.97
  -7  -5  -1    0.23    0.94
  -7  -5  -1   -0.80    1.41
   7   5   1    0.10    1.71
   7   5   1    1.05    1.10
  -8  -5  -1   -0.01    1.28
  -8  -5  -1   -2.22    2.17
   8   5   1    2.00    1.36
   8   5   1   -0.89    2.18
  -9  -5  -1    0.07    3.33
  -9  -5  -1    0.24    2.02
   9   5   1    1.05    1.49
   9   5   1    1.35    2.95
  10   5   1   -0.40    3.32
  10   5   1    2.35    1.78
   9  -6  -1    4.34    2.95
   9  -6  -1    1.48    3.40
  -9   6   1   -2.66    2.51
   8  -6  -1    0.81    2.17
   8  -6  -1   -1.69    2.51
  -8   6   1   -2.93    1.65
   7  -6  -1    0.81    1.45
   7  -6  -1    1.55    1.94
  -7   6   1   -0.74    1.07
  -7   6   1   -0.20    0.54
   6  -6  -1   12.85    2.17
   6  -6  -1   12.16    2.12
  -6   6   1   13.14    1.47
  -6   6   1   12.86    1.74
   5  -6  -1   22.40    2.48
   5  -6  -1   22.36    2.46
  -5   6   1   21.77    1.59
  -5   6   1   22.94    1.63
   4  -6  -1    1.15    0.93
   4  -6  -1    2.23    1.00
  -4   6   1    2.33    0.64
  -4   6   1    2.18    0.65
   3  -6  -1    1.02    0.78
   3  -6  -1    0.59    0.73
  -3   6   1    0.25    0.45
   2  -6  -1   21.18    1.81
   2  -6  -1   20.76    1.37
   2  -6  -1   20.02    1.56
  -2   6   1   19.88    0.78
  -2   6   1   19.76    1.27
   1  -6  -1   10.87    1.55
   1  -6  -1   10.86    0.98
   1  -6  -1   10.32    1.20
  -1   6   1   10.30    0.89
  -1   6   1   11.87    1.02
   0  -6  -1    1.11    0.79
   0  -6  -1    0.39    0.50
   0  -6  -1    0.50    0.35
   0   6   1    0.62    0.49
   0   6   1    0.31    0.41
  -1  -6  -1   15.91    1.01
  -1  -6  -1   15.22    1.01
  -1  -6  -1   16.65    1.83
   1   6   1   17.10    1.09
   1   6   1   15.29    1.32
  -2  -6  -1    3.70    1.05
  -2  -6  -1    4.34    0.63
   2   6   1    3.27    0.55
   2   6   1    4.42    0.87
   2   6   1    3.67    0.71
  -3  -6  -1    0.93    0.89
  -3  -6  -1    0.61    0.54
   3   6   1    0.93    0.43
   3   6   1    0.62    0.70
   3   6   1    0.98    0.69
  -4  -6  -1    0.85    0.96
  -4  -6  -1    0.73    0.65
   4   6   1    0.44    0.41
   4   6   1    0.30    0.85
   4   6   1    0.55    0.92
  -5  -6  -1   11.27    1.82
  -5  -6  -1   11.97    1.58
   5   6   1   12.39    1.89
   5   6   1   14.80    2.00
  -6  -6  -1   -0.79    1.16
  -6  -6  -1    0.97    0.84
   6   6   1   -0.29    1.26
   6   6   1    1.25    1.10
  -7  -6  -1   -0.71    1.94
  -7  -6  -1    1.66    1.04
   7   6   1    1.14    1.36
   7   6   1    2.20    1.96
  -8  -6  -1    0.87    1.27
  -8  -6  -1   -1.88    2.63
   8   6   1    0.75    2.35
   8   6   1    1.64    1.58
   9   6   1   -2.48    3.06
   9   6   1    1.06    1.72
  10   6   1   -1.84    3.44
   9  -7  -1   -0.92    3.47
   9  -7  -1    2.66    2.82
  -9   7   1   -4.74    2.49
   8  -7  -1    2.48    2.31
   8  -7  -1   -0.48    2.88
  -8   7   1   -2.97    1.79
   7  -7  -1    1.25    2.04
   7  -7  -1   -0.28    1.47
  -7   7   1   -1.49    1.18
  -7   7   1    0.02    0.66
   6  -7  -1    1.66    1.26
   6  -7  -1    2.05    1.53
  -6   7   1    1.24    0.89
  -6   7   1    1.26    0.72
   5  -7  -1    1.23    0.97
   5  -7  -1    1.77    1.16
  -5   7   1    0.45    0.53
  -5   7   1    0.48    0.64
   4  -7  -1    6.38    1.37
   4  -7  -1    5.52    1.20
  -4   7   1    6.38    0.95
  -4   7   1    6.24    0.91
   3  -7  -1    7.27    1.39
   3  -7  -1    5.83    1.12
   3  -7  -1    6.68    1.03
  -3   7   1    8.67    1.25
   2  -7  -1    4.07    1.17
   2  -7  -1    4.85    0.92
   2  -7  -1    4.40    0.82
  -2   7   1    4.26    0.70
  -2   7   1    4.86    0.67
   1  -7  -1    0.75    0.61
   1  -7  -1   -0.14    0.77
   1  -7  -1    0.40    0.46
  -1   7   1   -0.04    0.44
  -1   7   1    0.45    0.47
   0  -7  -1    0.16    0.53
   0  -7  -1    0.41    0.91
   0  -7  -1    0.25    0.39
   0   7   1    0.31    0.54
   0   7   1    0.61    0.46
  -1  -7  -1    1.44    0.45
  -1  -7  -1    0.82    0.91
  -1  -7  -1    1.24    0.45
   1   7   1    0.53    0.67
   1   7   1    1.12    0.50
  -2  -7  -1   22.00    1.35
  -2  -7  -1   22.14    2.44
   2   7   1   22.79    1.39
   2   7   1   22.63    1.54
   2   7   1   20.33    1.73
  -3  -7  -1   -0.12    0.50
  -3  -7  -1    0.32    1.06
   3   7   1   -0.04    0.80
   3   7   1   -0.28    0.67
   3   7   1    0.54    0.52
  -4  -7  -1    1.38    0.71
  -4  -7  -1    5.83    1.51
   4   7   1    2.03    0.53
   4   7   1    2.24    1.01
   4   7   1    1.29    0.95
  -5  -7  -1    1.29    1.37
  -5  -7  -1    0.39    0.71
   5   7   1    0.32    0.99
   5   7   1    0.19    1.19
  -6  -7  -1    3.40    1.00
  -6  -7  -1    2.69    1.78
   6   7   1    2.25    1.31
   6   7   1    2.04    1.73
  -7  -7  -1   -0.47    2.31
  -7  -7  -1    0.85    0.97
   7   7   1    0.45    1.37
   7   7   1    0.36    2.26
  -8  -7  -1    1.28    1.27
  -8  -7  -1   -5.64    3.05
   8   7   1    3.72    1.86
   8   7   1    1.74    2.90
  -9  -7  -1   -8.60    3.92
   9   7   1    9.35    2.30
   9   7   1    5.92    3.47
   9  -8  -1    0.74    2.80
   9  -8  -1   -1.71    3.22
  -9   8   1   -5.02    2.42
   8  -8  -1    2.52    2.35
   8  -8  -1   -3.02    3.05
  -8   8   1   -4.07    2.00
   7  -8  -1    2.04    1.74
   7  -8  -1    0.23    2.35
  -7   8   1    0.10    0.81
  -7   8   1    0.76    1.75
   6  -8  -1   10.91    2.59
   6  -8  -1    8.47    1.78
  -6   8   1    6.50    1.17
  -6   8   1   11.70    1.92
   5  -8  -1    3.77    1.18
   5  -8  -1    3.00    1.46
  -5   8   1    3.60    1.00
  -5   8   1    1.99    0.82
   4  -8  -1    6.59    1.28
   4  -8  -1    6.03    1.45
  -4   8   1    6.48    1.05
  -4   8   1    5.71    0.93
   3  -8  -1    1.42    0.81
   3  -8  -1    1.26    1.06
   3  -8  -1    0.76    0.72
  -3   8   1    1.59    0.71
   2  -8  -1   11.15    1.36
   2  -8  -1   10.68    1.47
   2  -8  -1   10.24    1.70
  -2   8   1    9.85    0.94
  -2   8   1   12.21    1.51
   1  -8  -1    7.98    1.56
   1  -8  -1    8.56    1.19
   1  -8  -1    8.31    1.39
  -1   8   1    8.47    1.18
  -1   8   1   10.87    1.34
   0  -8  -1   12.10    1.39
   0  -8  -1    9.45    1.61
   0  -8  -1   12.85    1.23
   0   8   1   12.09    1.40
   0   8   1   11.91    1.31
  -1  -8  -1   10.00    1.20
  -1  -8  -1    8.15    1.07
  -1  -8  -1    7.47    1.61
   1   8   1    8.61    1.17
   1   8   1    9.78    1.28
  -2  -8  -1    8.88    1.16
  -2  -8  -1    9.26    1.05
  -2  -8  -1    7.92    1.64
   2   8   1    9.70    1.35
   2   8   1    7.85    1.25
  -3  -8  -1    1.75    0.66
  -3  -8  -1    1.60    1.29
   3   8   1    1.64    0.86
   3   8   1    1.59    0.61
   3   8   1    1.84    1.03
  -4  -8  -1   -0.62    1.30
  -4  -8  -1    0.50    0.61
   4   8   1    0.70    0.97
   4   8   1   -0.36    0.49
   4   8   1   -0.28    0.95
  -5  -8  -1    1.00    0.71
  -5  -8  -1    1.55    1.70
   5   8   1    0.42    1.18
   5   8   1    1.04    1.12
  -6  -8  -1    3.25    2.40
  -6  -8  -1    5.39    1.11
   6   8   1    7.78    2.20
   6   8   1    6.84    1.86
  -7  -8  -1    1.21    3.14
  -7  -8  -1    2.28    0.99
   7   8   1    2.80    1.81
   7   8   1    0.93    2.25
  -8  -8  -1   -3.38    3.95
   8   8   1   -1.06    2.78
   8   8   1    1.86    2.04
   9   8   1   -1.78    3.22
   9   8   1    2.41    2.15
   9  -9  -1    4.26    2.83
   9  -9  -1    3.23    3.85
   8  -9  -1    1.14    2.19
   8  -9  -1    0.61    3.42
  -8   9   1   -2.10    2.21
   7  -9  -1    2.87    2.83
   7  -9  -1    0.57    1.44
  -7   9   1   -0.12    1.03
  -7   9   1   -2.37    1.37
   6  -9  -1    1.65    1.09
   6  -9  -1    2.86    2.28
  -6   9   1    0.33    0.93
  -6   9   1    1.43    1.25
   5  -9  -1    5.47    1.85
   5  -9  -1    4.78    1.23
  -5   9   1    4.81    1.18
  -5   9   1    6.14    1.37
   4  -9  -1    0.65    1.06
   4  -9  -1    1.01    0.85
  -4   9   1    0.08    0.80
  -4   9   1    0.04    0.42
   3  -9  -1   28.07    2.08
   3  -9  -1   27.06    2.12
   3  -9  -1   27.91    2.87
  -3   9   1   27.20    2.29
   2  -9  -1   10.74    1.51
   2  -9  -1    8.43    1.67
   2  -9  -1    9.63    1.43
  -2   9   1    9.97    1.05
  -2   9   1    6.80    1.02
   1  -9  -1    2.98    0.79
   1  -9  -1    2.69    1.30
   1  -9  -1    2.30    0.79
  -1   9   1    2.20    0.76
  -1   9   1    2.02    0.72
   0  -9  -1    3.12    1.38
   0  -9  -1    3.32    0.79
   0  -9  -1    3.44    0.88
   0   9   1    2.32    0.88
   0   9   1    2.82    0.81
  -1  -9  -1    9.59    1.87
  -1  -9  -1   12.74    1.47
  -1  -9  -1   12.52    1.31
   1   9   1   12.92    1.61
   1   9   1   10.47    1.37
  -2  -9  -1    0.36    1.22
  -2  -9  -1   -0.13    0.50
  -2  -9  -1   -0.14    0.41
   2   9   1    0.56    0.96
   2   9   1    0.35    0.68
  -3  -9  -1   11.01    1.39
  -3  -9  -1    7.30    1.97
   3   9   1    7.00    0.94
   3   9   1    6.98    1.44
   3   9   1    7.21    1.20
  -4  -9  -1    6.31    1.00
  -4  -9  -1    3.74    1.85
   4   9   1    3.57    0.74
   4   9   1    4.54    1.41
   4   9   1    4.40    1.22
  -5  -9  -1    1.82    2.13
  -5  -9  -1    1.50    0.76
   5   9   1    1.87    1.54
   5   9   1   -0.07    1.21
  -6  -9  -1   -1.61    2.66
  -6  -9  -1    0.75    0.73
   6   9   1    0.30    1.58
   6   9   1    0.31    1.74
  -7  -9  -1    2.91    3.95
   7   9   1    5.80    2.60
   7   9   1    4.83    2.01
  -8  -9  -1   -4.59    3.99
   8   9   1   -2.16    3.04
   8   9   1    4.95    2.42
   9   9   1    3.94    2.34
   9   9   1   -3.27    3.21
   8 -10  -1    1.14    3.37
  -8  10   1   -3.10    2.16
   7 -10  -1    9.19    3.65
  -7  10   1    3.69    1.59
  -7  10   1    6.36    2.20
   6 -10  -1    6.27    2.64
  -6  10   1    5.10    1.84
   5 -10  -1    8.54    2.48
   5 -10  -1    5.23    1.25
  -5  10   1    6.45    1.45
  -5  10   1    9.76    1.68
   4 -10  -1    1.33    1.40
   4 -10  -1    1.32    0.74
  -4  10   1    2.56    0.85
  -4  10   1    1.01    1.14
   3 -10  -1    3.77    1.09
   3 -10  -1    3.75    1.68
   3 -10  -1    4.36    0.91
  -3  10   1    3.30    1.05
   2 -10  -1    1.56    1.26
   2 -10  -1    1.37    0.69
   2 -10  -1    0.78    0.77
  -2  10   1    1.46    0.57
  -2  10   1    2.29    0.99
   1 -10  -1   44.01    3.50
   1 -10  -1   43.36    2.29
   1 -10  -1   40.95    2.17
  -1  10   1   41.17    2.07
  -1  10   1   39.53    2.65
   0 -10  -1   -0.52    1.24
   0 -10  -1    0.76    0.76
   0 -10  -1    0.21    0.60
   0  10   1    0.73    0.87
   0  10   1    0.01    0.76
  -1 -10  -1   36.34    2.21
  -1 -10  -1   37.62    2.03
  -1 -10  -1   40.28    3.73
   1  10   1   40.59    2.60
   1  10   1   37.41    2.54
  -2 -10  -1    1.35    1.51
  -2 -10  -1    0.69    0.59
  -2 -10  -1   -0.32    0.49
   2  10   1    0.14    1.07
   2  10   1    0.43    0.78
  -3 -10  -1    0.51    1.82
  -3 -10  -1    0.03    0.53
  -3 -10  -1    1.12    0.57
   3  10   1   -0.03    1.17
   3  10   1    0.00    0.67
  -4 -10  -1    0.40    2.04
  -4 -10  -1    0.88    0.67
   4  10   1    0.16    0.93
   4  10   1   -0.37    0.63
   4  10   1    0.33    1.29
  -5 -10  -1    0.91    2.83
  -5 -10  -1    1.18    0.70
   5  10   1   -0.55    1.16
   5  10   1    0.84    1.61
  -6 -10  -1    0.39    3.33
   6  10   1    0.26    1.70
   6  10   1    1.53    1.84
  -7 -10  -1   -2.91    4.03
   7  10   1    2.15    2.26
   7  10   1   -2.16    2.37
  -8 -10  -1   -9.53    4.55
   8  10   1    6.69    2.48
   8  10   1    0.23    3.18
   8 -11  -1    1.87    3.38
  -8  11   1   -0.83    2.16
   7 -11  -1   -0.12    3.10
  -7  11   1   -1.91    1.59
  -7  11   1   -0.68    1.96
   6 -11  -1    0.76    2.50
  -6  11   1   -0.42    1.44
  -6  11   1    1.87    1.31
   5 -11  -1    1.13    2.14
  -5  11   1   -0.39    1.43
  -5  11   1    1.47    1.16
   4 -11  -1    1.43    1.98
  -4  11   1    3.04    1.52
   3 -11  -1    3.72    1.78
   3 -11  -1    2.94    1.26
  -3  11   1    2.89    1.42
   2 -11  -1    5.46    1.90
   2 -11  -1    5.99    1.32
  -2  11   1    3.66    1.23
  -2  11   1    4.33    0.91
   1 -11  -1    5.93    1.95
   1 -11  -1    5.00    1.08
  -1  11   1    6.33    1.36
  -1  11   1    5.47    0.98
   0 -11  -1    0.59    0.63
   0 -11  -1   -0.70    1.37
   0  11   1    0.61    0.98
   0  11   1   -0.11    0.79
  -1 -11  -1    2.51    0.79
  -1 -11  -1    2.42    1.94
   1  11   1    2.91    1.14
   1  11   1    2.59    1.18
  -2 -11  -1    0.72    0.62
  -2 -11  -1    2.03    2.00
   2  11   1   -0.28    0.91
   2  11   1    0.43    1.16
  -3 -11  -1    0.65    0.66
  -3 -11  -1    0.44    2.08
   3  11   1    0.73    0.86
   3  11   1    1.86    1.53
  -4 -11  -1    3.60    2.88
  -4 -11  -1    4.34    0.92
   4  11   1    7.55    2.08
   4  11   1    3.07    0.92
  -5 -11  -1    2.06    3.52
   5  11   1    3.93    2.06
   5  11   1    1.41    1.59
  -6 -11  -1   -4.21    3.99
   6  11   1   -0.50    2.82
   6  11   1    1.65    2.24
  -7 -11  -1   -6.66    4.67
   7  11   1    1.82    2.49
   8  11   1    5.28    2.68
   7 -12  -1    1.62    3.35
  -7  12   1    0.60    2.09
  -7  12   1    1.54    2.00
   6 -12  -1    1.41    3.03
  -6  12   1    0.12    1.98
  -6  12   1    2.39    1.78
   5 -12  -1    1.93    2.75
  -5  12   1    5.52    1.47
  -5  12   1    0.33    1.92
   4 -12  -1    0.03    2.17
  -4  12   1   -0.69    1.65
   3 -12  -1    1.16    2.24
   3 -12  -1    1.22    1.28
  -3  12   1    2.08    1.63
   2 -12  -1    0.40    1.77
   2 -12  -1    0.01    0.98
  -2  12   1    1.04    1.48
   1 -12  -1    4.79    2.20
   1 -12  -1    4.86    1.20
  -1  12   1    5.29    1.60
  -1  12   1    4.50    0.97
   0 -12  -1    0.72    1.87
   0 -12  -1    0.56    0.71
   0  12   1    0.10    0.87
   0  12   1   -0.62    1.41
  -1 -12  -1    4.43    2.33
  -1 -12  -1    3.88    0.99
   1  12   1    4.57    1.52
   1  12   1    5.78    1.50
  -2 -12  -1    2.77    0.87
  -2 -12  -1    1.59    2.44
   2  12   1    2.90    1.60
   2  12   1    3.10    1.33
  -3 -12  -1   -1.67    2.74
  -3 -12  -1    0.31    0.66
   3  12   1    1.61    1.81
   3  12   1    0.32    1.00
  -4 -12  -1   -1.01    3.21
  -4 -12  -1    0.17    0.71
   4  12   1    0.83    1.92
  -5 -12  -1    2.78    4.32
   5  12   1    0.67    2.30
  -6 -12  -1    0.06    5.00
   6  12   1    5.72    2.67
  -7 -12  -1   -9.23    5.19
   7  12   1    4.59    2.62
   7 -13  -1    2.53    3.68
  -7  13   1   -4.50    2.08
  -7  13   1    1.58    2.03
   6 -13  -1    2.96    3.34
  -6  13   1    4.00    1.66
   5 -13  -1    2.40    3.14
  -5  13   1    1.02    2.36
   4 -13  -1    4.31    3.00
  -4  13   1    1.05    2.09
   3 -13  -1    0.81    1.67
   3 -13  -1    4.17    2.46
  -3  13   1   -0.59    1.84
   2 -13  -1    1.38    1.29
   2 -13  -1    2.21    2.65
  -2  13   1   -0.49    1.69
   1 -13  -1    2.47    1.31
   1 -13  -1    4.51    2.80
  -1  13   1    0.75    1.90
  -1  13   1    1.79    1.02
   0 -13  -1    0.92    2.48
   0 -13  -1    1.24    0.90
   0  13   1   -0.57    1.73
   0  13   1    1.99    1.11
  -1 -13  -1    1.98    3.13
  -1 -13  -1    0.21    0.76
   1  13   1   -1.81    1.51
   1  13   1    2.08    1.44
  -2 -13  -1    5.49    1.15
  -2 -13  -1    6.04    3.37
   2  13   1    8.65    2.15
   2  13   1    6.81    1.87
  -3 -13  -1    6.27    3.95
  -3 -13  -1    3.50    1.00
   3  13   1    2.94    1.42
   3  13   1    7.33    2.41
  -4 -13  -1    1.26    4.38
   4  13   1    1.44    2.35
  -5 -13  -1   -5.01    4.88
   5  13   1    1.06    2.49
   6  13   1    3.73    2.64
   6 -14  -1    4.26    3.56
  -6  14   1   -0.45    2.62
  -6  14   1    6.50    1.92
   5 -14  -1    0.69    3.33
  -5  14   1   -2.43    2.31
   4 -14  -1    2.17    3.10
   3 -14  -1    1.10    1.93
   3 -14  -1    1.24    3.25
  -3  14   1   -2.01    2.23
   2 -14  -1    2.80    3.06
   2 -14  -1    0.44    1.61
  -2  14   1   -3.12    1.97
   1 -14  -1    2.79    3.13
   1 -14  -1    0.90    1.34
  -1  14   1   -4.49    1.98
   0 -14  -1   11.34    3.91
   0 -14  -1    5.55    1.46
   0  14   1    4.16    2.24
   0  14   1    5.99    1.43
  -1 -14  -1    0.13    0.88
  -1 -14  -1    6.06    3.70
   1  14   1   -2.14    1.99
   1  14   1    0.26    1.46
  -2 -14  -1    3.42    4.11
  -2 -14  -1    0.02    0.75
   2  14   1   -2.12    1.83
   2  14   1    2.00    2.07
  -3 -14  -1    3.05    4.65
   3  14   1    1.61    2.34
   3  14   1   -2.99    1.58
  -4 -14  -1   -0.09    5.20
   4  14   1    4.30    2.61
  -5 -14  -1   -5.79    4.98
   5  14   1    5.77    2.75
  -6 -14  -1   -9.51    5.67
   6  14   1    4.34    2.62
   5 -15  -1    3.99    3.42
   4 -15  -1   -0.77    3.56
   3 -15  -1    0.60    2.26
   3 -15  -1    3.86    3.58
  -3  15   1   -3.12    2.57
   2 -15  -1    0.28    1.86
   2 -15  -1    5.01    3.60
  -2  15   1   -4.22    2.73
   1 -15  -1   -0.86    1.52
   1 -15  -1    4.62    4.06
  -1  15   1   -4.19    2.65
   0 -15  -1   -0.59    1.24
   0 -15  -1    5.71    3.84
   0  15   1   -3.22    2.54
  -1 -15  -1    6.39    4.40
  -1 -15  -1    0.14    1.10
   1  15   1    3.47    1.90
   1  15   1   -3.77    2.49
  -2 -15  -1    3.52    4.90
   2  15   1    4.04    2.44
   2  15   1    1.12    2.46
  -3 -15  -1    6.77    5.17
   3  15   1    6.40    2.59
  -4 -15  -1    7.61    5.55
   4  15   1    8.14    3.02
  -5 -15  -1   -3.78    5.43
   3 -16  -1   -1.98    2.30
   3 -16  -1    5.32    3.88
   2 -16  -1   -0.48    2.07
   2 -16  -1    4.99    4.25
  -2  16   1   -4.92    2.71
   1 -16  -1   11.50    4.36
   1 -16  -1    1.41    1.89
  -1  16   1   -2.95    2.71
   0 -16  -1    1.27    4.06
   0 -16  -1   -1.25    1.55
  -1 -16  -1    6.14    4.59
   1  16   1   -2.38    2.79
   1  16   1    4.21    2.15
  -2 -16  -1    7.44    4.68
   2  16   1    6.40    2.59
   2  16   1   -5.62    2.67
  -3 -16  -1    9.02    5.47
   3  16   1    6.63    2.68
   1 -17  -1    7.45    4.17
  -1  17   1   -4.55    2.92
   0 -17  -1    9.38    4.51
  -1 -17  -1   13.95    5.14
  -3 -15   2    3.88    5.16
   2  15  -2    7.05    2.93
  -2 -15   2    8.90    4.90
  -2 -15   2    1.43    1.95
   1  15  -2    6.18    2.73
  -1 -15   2    2.72    2.24
  -1 -15   2    9.47    4.80
   0 -15   2    7.12    4.39
   0 -15   2    0.78    2.16
  -1  15  -2   -5.52    2.63
   1 -15   2    7.02    4.17
   1 -15   2   -0.81    2.22
   2 -15   2    8.11    4.13
   2 -15   2   -2.75    2.33
  -3  15  -2   -7.31    3.06
   3 -15   2   12.83    4.14
   3 -15   2    0.53    2.88
   4  14  -2    6.68    3.18
  -4 -14   2   -4.22    5.40
   3  14  -2    3.93    3.01
  -3 -14   2    7.11    5.11
  -3 -14   2    2.14    1.82
   2  14  -2    4.13    2.94
  -2 -14   2    2.04    1.80
   1  14  -2    6.97    2.84
   1  14  -2   -1.52    2.53
  -1 -14   2   10.41    4.67
  -1 -14   2    3.97    2.11
   0  14  -2    2.09    2.15
   0  14  -2   -6.09    2.46
   0 -14   2   -1.10    1.73
   0 -14   2    7.61    4.16
  -1  14  -2   -4.07    2.40
   1 -14   2    2.33    2.19
   1 -14   2    6.19    3.78
  -2  14  -2   -3.79    2.69
   2 -14   2    0.64    2.23
   2 -14   2   10.61    4.04
  -3  14  -2   -4.46    2.40
   3 -14   2   -0.24    2.54
   3 -14   2    5.19    3.40
  -4  14  -2   -4.19    2.57
   4 -14   2    0.32    2.86
   4 -14   2    2.68    3.60
   5 -14   2    5.73    3.70
   5 -14   2   -2.96    2.99
   5  13  -2    5.61    3.02
  -5 -13   2   -9.73    5.31
   4  13  -2    5.17    3.06
  -4 -13   2    3.44    1.72
  -4 -13   2    5.97    5.46
   3  13  -2    1.98    1.98
  -3 -13   2   13.31    4.94
  -3 -13   2    6.22    1.90
   2  13  -2    4.48    2.74
   2  13  -2   -2.70    1.76
  -2 -13   2    7.19    4.34
  -2 -13   2    1.70    1.65
   1  13  -2    4.74    2.33
   1  13  -2   12.23    2.80
  -1 -13   2   11.52    4.03
  -1 -13   2   10.41    2.30
   0  13  -2    0.37    2.06
   0  13  -2    4.97    2.03
   0 -13   2    9.72    3.68
   0 -13   2    4.16    1.99
  -1  13  -2   -2.04    2.16
  -1  13  -2    1.25    1.45
   1 -13   2    3.17    3.18
   1 -13   2    0.64    1.70
  -2  13  -2    3.11    2.32
   2 -13   2    6.22    2.42
   2 -13   2    8.93    3.60
  -3  13  -2   -4.16    2.33
   3 -13   2    3.15    2.54
   3 -13   2    8.76    3.46
  -4  13  -2   -6.03    2.35
   4 -13   2    0.18    2.57
   4 -13   2    5.91    3.33
   5 -13   2   -1.94    2.76
   5 -13   2    3.14    3.37
   6  12  -2    5.50    2.83
   5  12  -2    4.50    2.92
  -5 -12   2   -2.75    5.27
  -5 -12   2    1.77    1.48
   4  12  -2    2.21    2.75
  -4 -12   2    2.03    4.68
  -4 -12   2    3.76    1.52
   3  12  -2   -2.48    1.19
   3  12  -2    0.39    2.55
  -3 -12   2    3.99    4.20
  -3 -12   2    0.36    1.25
   2  12  -2    5.01    2.44
   2  12  -2   -0.21    1.47
  -2 -12   2    2.45    1.38
  -2 -12   2    5.47    3.66
   1  12  -2   -1.92    1.54
   1  12  -2    2.83    2.01
  -1 -12   2    0.90    1.30
  -1 -12   2    4.35    2.93
   0  12  -2    3.43    1.93
   0  12  -2    8.18    2.01
   0 -12   2    7.64    3.01
   0 -12   2    6.23    1.80
  -1  12  -2    1.56    1.28
  -1  12  -2    1.58    1.79
   1 -12   2    2.41    2.82
   1 -12   2    3.75    1.71
  -2  12  -2    2.78    1.95
   2 -12   2    6.00    2.86
   2 -12   2    5.81    2.11
  -3  12  -2   -1.69    1.77
   3 -12   2    0.81    2.02
   3 -12   2    2.31    2.60
  -4  12  -2   -1.49    2.09
   4 -12   2   -0.77    2.20
   4 -12   2    3.56    3.01
  -5  12  -2   -3.55    1.93
   5 -12   2   -1.65    2.56
   5 -12   2    0.87    2.97
   6 -12   2    4.73    3.46
   7 -12   2    3.18    3.73
   7  11  -2    6.53    2.91
   6  11  -2    6.07    2.89
  -6 -11   2    0.82    1.40
  -6 -11   2   -8.08    4.72
   5  11  -2    2.38    2.78
  -5 -11   2   -2.59    4.38
  -5 -11   2    3.46    1.48
   4  11  -2   -0.80    2.37
  -4 -11   2   -2.15    3.70
  -4 -11   2    0.88    1.07
   3  11  -2   -0.39    0.97
   3  11  -2    1.53    2.21
  -3 -11   2    3.27    1.24
  -3 -11   2    1.98    3.39
   2  11  -2   11.07    2.54
   2  11  -2    8.08    1.59
  -2 -11   2   10.60    3.34
  -2 -11   2    8.13    1.61
   1  11  -2   -0.60    1.13
   1  11  -2    1.80    1.76
  -1 -11   2    1.59    1.09
  -1 -11   2    0.77    2.25
   0  11  -2    0.94    1.42
   0  11  -2    0.37    1.32
   0 -11   2    2.25    2.27
   0 -11   2    0.07    0.98
  -1  11  -2    1.15    1.30
  -1  11  -2    0.90    1.17
   1 -11   2    2.54    2.15
   1 -11   2    0.92    1.17
  -2  11  -2   15.69    2.22
  -2  11  -2   16.31    2.20
   2 -11   2   17.15    2.36
   2 -11   2   17.21    3.12
  -3  11  -2   -0.64    1.46
   3 -11   2    1.46    2.27
   3 -11   2   -1.72    1.47
  -4  11  -2   -1.93    1.57
   4 -11   2   -0.67    1.71
   4 -11   2    1.51    2.20
  -5  11  -2   -0.41    1.79
   5 -11   2    2.20    2.26
   5 -11   2    2.93    2.91
  -6  11  -2   -2.68    1.86
   6 -11   2    2.53    2.99
  -7  11  -2    7.26    1.65
   7 -11   2   -1.80    3.47
   7  10  -2    1.89    2.81
   6  10  -2    2.53    2.51
  -6 -10   2   -1.13    4.47
  -6 -10   2    2.72    1.56
   5  10  -2    4.95    2.38
  -5 -10   2    3.34    1.27
  -5 -10   2   -0.01    3.71
   4  10  -2    0.24    2.02
  -4 -10   2    0.07    0.88
  -4 -10   2    0.40    3.09
   3  10  -2   -0.07    1.81
   3  10  -2   -0.15    0.77
  -3 -10   2    0.55    2.37
  -3 -10   2   -0.33    0.76
   2  10  -2    0.72    1.59
   2  10  -2    0.18    0.84
  -2 -10   2   -0.40    1.92
  -2 -10   2   -0.22    0.80
   1  10  -2    1.87    1.51
   1  10  -2    0.75    0.99
  -1 -10   2    1.41    0.97
  -1 -10   2    2.95    2.06
   0  10  -2    2.77    1.06
   0  10  -2    2.79    1.38
   0 -10   2    4.32    1.17
   0 -10   2    3.33    1.83
  -1  10  -2    3.64    1.14
  -1  10  -2    3.48    1.24
   1 -10   2    2.84    1.82
   1 -10   2    4.56    1.27
  -2  10  -2    0.05    0.91
  -2  10  -2   -1.15    0.80
   2 -10   2   -0.11    1.59
   2 -10   2    1.00    1.00
  -3  10  -2    1.86    1.15
   3 -10   2    1.42    1.31
   3 -10   2    1.89    1.75
  -4  10  -2    2.48    1.37
   4 -10   2    1.13    2.04
   4 -10   2    2.33    1.58
  -5  10  -2   -0.21    1.44
   5 -10   2    1.58    2.18
   5 -10   2    1.61    1.99
  -6  10  -2   -1.03    1.56
   6 -10   2    2.75    2.88
  -7  10  -2   -3.18    1.60
  -7  10  -2    4.65    1.89
   7 -10   2    0.78    3.21
  -8  10  -2    1.78    1.96
  -8  10  -2   -4.68    2.24
   8 -10   2    1.23    3.68
   8   9  -2    8.16    2.66
   7   9  -2    4.11    2.51
  -7  -9   2    5.11    1.94
  -7  -9   2   -4.24    4.19
   6   9  -2    1.50    2.12
  -6  -9   2    0.92    1.23
  -6  -9   2   -3.63    3.51
   5   9  -2   -0.27    1.88
  -5  -9   2    0.21    1.07
  -5  -9   2   -3.29    2.65
   4   9  -2    1.43    1.75
  -4  -9   2    1.67    2.44
  -4  -9   2    2.63    1.09
   3   9  -2   22.10    2.90
   3   9  -2   19.93    1.79
  -3  -9   2   14.51    2.72
  -3  -9   2   20.10    2.09
   2   9  -2    0.63    1.40
   2   9  -2    1.20    0.73
  -2  -9   2    1.26    1.80
  -2  -9   2    0.66    0.79
   1   9  -2    0.69    1.25
   1   9  -2    0.68    0.70
  -1  -9   2   -0.01    0.70
  -1  -9   2   -0.27    1.52
   0   9  -2    0.08    0.67
   0   9  -2    0.78    1.18
   0  -9   2   -0.56    1.29
   0  -9   2   -0.35    0.71
  -1   9  -2    2.46    1.15
  -1   9  -2    0.73    0.76
   1  -9   2    1.78    0.93
   1  -9   2    0.56    1.40
  -2   9  -2    0.21    0.90
  -2   9  -2    0.54    0.70
   2  -9   2    0.50    1.24
   2  -9   2   -0.29    0.78
  -3   9  -2   -0.22    0.75
  -3   9  -2    0.11    0.75
   3  -9   2    0.77    0.99
   3  -9   2    0.60    1.38
  -4   9  -2    1.50    1.01
   4  -9   2    2.15    1.56
   4  -9   2    2.44    1.23
  -5   9  -2   -0.44    0.98
   5  -9   2    1.26    1.90
   5  -9   2    1.35    1.51
  -6   9  -2   -0.42    1.17
  -6   9  -2    4.50    1.16
   6  -9   2    0.80    2.29
  -7   9  -2   -2.47    1.18
  -7   9  -2    1.57    1.47
   7  -9   2   -0.54    2.93
  -8   9  -2   -0.73    1.76
   8  -9   2   -1.21    3.31
   8   8  -2    0.82    2.99
   8   8  -2    2.44    2.30
  -8  -8   2    3.55    2.06
   7   8  -2    3.83    2.39
   7   8  -2    0.52    2.45
  -7  -8   2    2.74    1.75
  -7  -8   2   -4.73    3.63
   6   8  -2    4.75    2.23
   6   8  -2    4.08    1.95
  -6  -8   2    5.05    1.48
  -6  -8   2    2.02    3.10
   5   8  -2    0.93    1.77
   5   8  -2    0.04    1.20
  -5  -8   2    1.45    1.10
  -5  -8   2   -1.58    2.24
   4   8  -2    1.73    0.66
   4   8  -2    2.30    1.09
   4   8  -2    3.24    1.59
  -4  -8   2    3.12    1.06
  -4  -8   2    2.94    2.03
   3   8  -2    4.81    0.98
   3   8  -2    4.65    0.80
   3   8  -2    4.12    1.46
  -3  -8   2    5.36    1.96
  -3  -8   2    5.59    1.13
   2   8  -2   10.48    1.20
   2   8  -2    9.89    1.72
   2   8  -2   11.61    1.36
  -2  -8   2    9.04    1.34
  -2  -8   2    7.46    1.90
   1   8  -2    0.49    0.55
   1   8  -2    0.19    1.14
  -1  -8   2   -0.09    1.32
  -1  -8   2   -0.31    0.63
   0   8  -2    0.84    0.60
   0   8  -2    1.16    1.09
   0  -8   2    0.57    1.23
   0  -8   2    0.63    0.69
  -1   8  -2   12.45    1.41
  -1   8  -2    9.35    1.33
   1  -8   2   10.49    1.56
   1  -8   2    8.86    1.72
  -2   8  -2    6.68    0.97
  -2   8  -2    8.11    1.17
   2  -8   2    7.45    1.24
   2  -8   2    6.99    1.60
  -3   8  -2    6.38    1.03
  -3   8  -2    7.15    1.07
   3  -8   2    6.76    1.62
   3  -8   2    7.05    1.30
  -4   8  -2    0.37    0.70
   4  -8   2    0.67    0.89
   4  -8   2    0.24    1.17
  -5   8  -2    2.17    1.00
   5  -8   2    3.34    1.84
   5  -8   2    2.53    1.33
  -6   8  -2    2.98    1.10
  -6   8  -2    1.87    1.05
   6  -8   2    2.48    2.10
  -7   8  -2    0.56    1.36
  -7   8  -2   -1.86    0.90
   7  -8   2   -1.55    2.47
  -8   8  -2    0.89    1.92
   8  -8   2    0.66    2.87
  -9   8  -2   -4.32    2.07
   9  -8   2   -1.42    3.39
   9   7  -2    0.34    3.27
  -9  -7   2    4.56    3.51
   8   7  -2   -0.47    2.88
   8   7  -2    2.80    2.20
  -8  -7   2   -8.23    3.84
  -8  -7   2    2.01    2.05
   7   7  -2    1.09    2.24
   7   7  -2    3.80    2.20
  -7  -7   2   -4.40    3.10
  -7  -7   2    1.73    1.61
   6   7  -2    2.07    1.65
   6   7  -2    1.50    1.70
  -6  -7   2    2.05    1.28
  -6  -7   2    2.03    2.71
   5   7  -2    0.79    1.14
   5   7  -2    0.38    1.39
  -5  -7   2    0.06    0.88
  -5  -7   2   -1.31    1.69
   4   7  -2    5.64    0.75
   4   7  -2    6.25    1.59
   4   7  -2    5.36    1.24
  -4  -7   2    7.84    2.01
  -4  -7   2    6.63    1.26
   3   7  -2    3.73    1.34
   3   7  -2    2.98    0.94
   3   7  -2    2.87    0.61
  -3  -7   2    2.86    0.96
  -3  -7   2    3.63    1.57
   2   7  -2    0.45    0.55
   2   7  -2    0.26    0.48
   2   7  -2    0.35    1.03
  -2  -7   2    0.10    0.66
  -2  -7   2    0.23    1.26
   1   7  -2    1.40    1.07
   1   7  -2    1.58    0.57
  -1  -7   2    1.82    1.31
  -1  -7   2    1.15    0.71
   0   7  -2    2.36    0.61
   0   7  -2    2.77    1.01
   0  -7   2    2.81    0.80
   0  -7   2    1.80    1.23
  -1   7  -2   16.62    1.82
  -1   7  -2   15.75    1.37
   1  -7   2   16.42    2.33
   1  -7   2   16.83    1.55
  -2   7  -2   15.32    1.37
  -2   7  -2   16.53    1.67
   2  -7   2   14.41    2.04
   2  -7   2   14.82    1.58
  -3   7  -2    5.25    0.87
  -3   7  -2    4.71    0.82
   3  -7   2    5.96    0.93
   3  -7   2    6.22    1.14
   3  -7   2    5.12    1.34
  -4   7  -2    0.61    0.60
  -4   7  -2    0.07    0.62
   4  -7   2    0.33    0.73
   4  -7   2    0.72    1.05
   4  -7   2    0.24    0.58
  -5   7  -2    5.19    0.96
   5  -7   2    4.58    1.02
   5  -7   2    5.00    1.32
   5  -7   2    6.11    1.67
  -6   7  -2    1.07    0.79
  -6   7  -2    0.27    0.74
   6  -7   2    0.47    0.84
   6  -7   2    1.64    1.91
  -7   7  -2   -0.62    0.70
  -7   7  -2   -0.38    1.08
   7  -7   2    0.19    1.00
   7  -7   2    1.69    2.16
  -8   7  -2   -0.54    1.79
   8  -7   2    1.03    3.06
   8  -7   2    0.44    1.76
  -9   7  -2   -0.34    2.32
   9  -7   2    5.32    2.59
   9  -7   2    1.43    3.21
   9   6  -2    2.25    1.93
   9   6  -2    2.13    3.26
  -9  -6   2    2.14    2.47
   8   6  -2    2.75    1.99
   8   6  -2    0.83    2.72
  -8  -6   2   -4.48    3.50
  -8  -6   2    1.72    1.98
   7   6  -2    3.31    1.83
   7   6  -2    0.56    2.06
  -7  -6   2    0.64    1.47
  -7  -6   2   -1.62    2.64
   6   6  -2    3.06    1.61
   6   6  -2    2.63    1.73
  -6  -6   2    0.70    1.97
  -6  -6   2    3.27    1.38
   5   6  -2    5.14    1.49
   5   6  -2    3.91    1.52
  -5  -6   2    3.84    1.70
  -5  -6   2    4.30    1.16
   4   6  -2    2.21    0.51
   4   6  -2    2.74    1.11
   4   6  -2    2.72    1.27
  -4  -6   2    2.34    1.36
  -4  -6   2    2.90    0.99
   3   6  -2   10.83    1.61
   3   6  -2    7.04    1.36
   3   6  -2   10.18    0.96
  -3  -6   2    9.01    1.24
  -3  -6   2    8.85    1.69
   2   6  -2    2.55    0.52
   2   6  -2    1.30    1.02
   2   6  -2    2.58    0.69
  -2  -6   2    2.41    0.81
  -2  -6   2    2.85    1.24
   1   6  -2   11.88    0.96
   1   6  -2   11.18    1.64
  -1  -6   2    8.51    1.47
  -1  -6   2   12.14    1.34
   0   6  -2   10.94    1.01
   0   6  -2    8.23    1.12
   0  -6   2   10.09    1.20
   0  -6   2    7.27    1.36
  -1   6  -2    0.30    0.35
  -1   6  -2    0.12    0.64
   1  -6   2    0.34    0.84
   1  -6   2    0.20    0.50
  -2   6  -2    0.40    0.63
  -2   6  -2    0.48    0.40
   2  -6   2    0.20    0.87
   2  -6   2    0.57    0.59
  -3   6  -2    0.57    0.47
  -3   6  -2    1.00    0.60
   3  -6   2    0.68    0.50
   3  -6   2    0.47    0.89
   3  -6   2    0.27    0.68
  -4   6  -2    0.19    0.48
  -4   6  -2    0.00    0.50
   4  -6   2    0.50    0.96
   4  -6   2   -0.10    0.54
   4  -6   2    0.19    0.65
  -5   6  -2    4.75    0.78
   5  -6   2    5.19    1.09
   5  -6   2    6.79    1.62
  -6   6  -2   14.17    1.66
  -6   6  -2   12.95    1.53
   6  -6   2   19.89    3.17
   6  -6   2   14.40    2.16
  -7   6  -2    0.52    0.65
  -7   6  -2    2.67    1.29
   7  -6   2    2.73    2.25
   7  -6   2    2.40    1.36
  -8   6  -2   -1.04    1.56
   8  -6   2    1.00    1.90
   8  -6   2   -2.37    2.36
  -9   6  -2   -2.59    2.15
   9  -6   2    2.37    2.48
   9  -6   2   -2.39    3.30
   9   5  -2    6.38    2.24
   9   5  -2   -0.51    3.01
  -9  -5   2    5.15    2.71
   8   5  -2    3.36    1.80
   8   5  -2    2.86    2.68
  -8  -5   2    3.25    2.16
  -8  -5   2   -1.42    2.96
   7   5  -2    2.71    1.57
   7   5  -2   -0.06    1.87
  -7  -5   2    0.34    1.40
  -7  -5   2   -1.00    2.04
   6   5  -2    4.74    1.59
   6   5  -2    7.48    2.09
  -6  -5   2    6.47    1.45
  -6  -5   2    5.31    1.83
   5   5  -2    4.97    1.45
   5   5  -2    5.24    1.48
  -5  -5   2    5.59    1.49
  -5  -5   2    7.11    1.33
   4   5  -2    0.83    1.03
   4   5  -2    0.47    0.89
   4   5  -2    0.23    0.35
  -4  -5   2    0.16    0.79
  -4  -5   2    0.50    0.97
   3   5  -2   10.51    1.57
   3   5  -2    6.58    1.29
   3   5  -2    9.92    0.82
  -3  -5   2    8.42    1.15
  -3  -5   2    8.28    1.38
   2   5  -2   17.33    1.85
   2   5  -2   16.60    0.96
   2   5  -2   16.57    1.32
  -2  -5   2   16.63    2.00
  -2  -5   2   15.53    1.42
   1   5  -2    0.65    0.70
   1   5  -2    0.41    0.31
   1   5  -2    0.31    0.27
  -1  -5   2    0.26    0.48
  -1  -5   2    0.27    0.80
   0   5  -2    0.73    0.62
   0   5  -2    0.49    0.33
   0  -5   2    0.47    0.80
   0  -5   2    0.51    0.46
  -1   5  -2   26.57    1.50
  -1   5  -2   26.28    1.25
   1  -5   2   25.17    1.46
   1  -5   2   26.17    1.91
  -2   5  -2    0.08    0.44
  -2   5  -2    0.25    0.31
   2  -5   2   -0.26    0.58
   2  -5   2   -0.05    0.45
   2  -5   2    0.13    0.26
  -3   5  -2    1.21    0.44
  -3   5  -2    0.67    0.38
   3  -5   2    0.12    0.68
   3  -5   2    0.33    0.45
   3  -5   2    0.50    0.60
  -4   5  -2   19.13    1.28
  -4   5  -2   19.64    0.99
   4  -5   2   21.01    1.67
   4  -5   2   18.95    1.69
   4  -5   2   21.99    2.16
  -5   5  -2    0.91    0.37
  -5   5  -2    1.17    0.57
  -5   5  -2    1.26    0.49
   5  -5   2    1.99    0.90
   5  -5   2    0.39    0.99
  -6   5  -2    0.81    0.62
  -6   5  -2    0.69    0.50
   6  -5   2    1.35    1.00
   6  -5   2    1.40    1.27
  -7   5  -2   -0.67    0.47
  -7   5  -2    0.06    0.93
   7  -5   2   -0.24    1.58
   7  -5   2    0.93    1.24
  -8   5  -2    0.38    1.43
   8  -5   2    0.94    2.61
   8  -5   2    0.59    1.77
  -9   5  -2   -3.07    2.04
   9  -5   2   -0.77    3.01
   9  -5   2    2.31    2.65
 -10   5  -2   -6.24    2.69
  10  -5   2    2.07    3.02
  10  -5   2   -2.41    3.61
   9   4  -2    0.95    3.01
   9   4  -2    2.91    1.72
  -9  -4   2   -0.92    3.00
   8   4  -2    0.19    2.57
   8   4  -2    2.83    1.50
  -8  -4   2   -1.93    2.51
  -8  -4   2    3.57    2.48
   7   4  -2    1.59    1.91
   7   4  -2    0.76    1.23
  -7  -4   2   -0.17    1.53
  -7  -4   2   -1.80    1.62
   6   4  -2    2.21    1.19
   6   4  -2    0.55    1.33
  -6  -4   2    1.88    1.24
  -6  -4   2    1.65    1.29
   5   4  -2    3.95    1.34
   5   4  -2    3.80    1.28
  -5  -4   2    4.29    1.18
  -5  -4   2    4.31    1.11
   4   4  -2   -0.90    0.81
   4   4  -2   -0.23    0.81
   4   4  -2    0.13    0.25
  -4  -4   2   -0.17    0.74
  -4  -4   2    0.43    0.75
   3   4  -2   14.59    1.58
   3   4  -2   14.55    1.70
   3   4  -2   14.47    0.75
  -3  -4   2   14.91    1.50
  -3  -4   2   15.10    1.73
   2   4  -2    3.67    0.69
   2   4  -2    3.42    0.85
   2   4  -2    4.51    0.55
  -2  -4   2    4.45    0.78
  -2  -4   2    3.65    0.90
   1   4  -2   82.78    2.58
   1   4  -2   83.77    1.96
   1   4  -2   82.63    2.08
  -1  -4   2   86.62    2.98
  -1  -4   2   85.60    2.46
   0   4  -2   24.13    1.37
   0   4  -2   24.90    1.05
   0  -4   2   25.76    1.31
   0  -4   2   24.68    1.72
  -1   4  -2  127.66    2.71
  -1   4  -2  126.66    2.80
   1  -4   2  128.61    3.06
   1  -4   2  132.98    3.67
  -2   4  -2    1.90    0.39
  -2   4  -2    2.23    0.42
   2  -4   2    2.47    0.44
   2  -4   2    1.77    0.52
   2  -4   2    2.19    0.79
  -3   4  -2    0.92    0.34
  -3   4  -2    0.81    0.28
   3  -4   2    1.26    0.48
   3  -4   2    2.05    0.65
   3  -4   2    1.44    0.69
  -4   4  -2    0.08    0.33
  -4   4  -2    0.15    0.24
   4  -4   2    0.31    0.72
   4  -4   2    0.12    0.58
   4  -4   2   -0.34    0.48
  -5   4  -2    6.43    0.97
  -5   4  -2    7.40    0.94
  -5   4  -2    7.68    0.62
   5  -4   2    6.01    1.38
   5  -4   2    6.22    1.17
  -6   4  -2    3.62    0.62
  -6   4  -2    4.21    0.85
   6  -4   2    5.49    1.57
   6  -4   2    4.56    1.29
  -7   4  -2    3.47    1.15
   7  -4   2    2.99    1.82
   7  -4   2    2.03    1.48
  -8   4  -2   -1.28    1.32
   8  -4   2   -0.52    1.99
   8  -4   2   -0.07    1.75
   9  -4   2   -2.25    3.03
   9  -4   2    2.63    2.69
  10  -4   2   -2.81    3.52
  10  -4   2    1.19    3.06
  10   3  -2    1.46    3.27
 -10  -3   2   -6.50    3.50
   9   3  -2    4.10    1.90
   9   3  -2    3.04    3.02
  -9  -3   2    1.26    3.06
  -9  -3   2    0.34    3.26
   8   3  -2    0.97    1.21
   8   3  -2   -0.95    2.13
  -8  -3   2    0.76    2.08
  -8  -3   2   -1.43    2.28
   7   3  -2    2.08    1.15
   7   3  -2    1.17    1.67
  -7  -3   2    1.03    1.66
  -7  -3   2    1.55    1.56
   6   3  -2    0.85    1.23
   6   3  -2    1.65    1.03
  -6  -3   2    1.15    1.12
  -6  -3   2    2.14    1.10
   5   3  -2    3.23    1.09
   5   3  -2    3.35    1.21
  -5  -3   2    3.14    0.96
  -5  -3   2    4.07    1.05
   4   3  -2    2.02    0.94
   4   3  -2    3.33    0.42
   4   3  -2    2.27    0.92
  -4  -3   2    2.05    0.82
  -4  -3   2    2.69    0.87
   3   3  -2   14.97    1.55
   3   3  -2   13.90    1.50
   3   3  -2   14.59    0.63
  -3  -3   2   14.92    1.37
  -3  -3   2   14.39    1.36
   2   3  -2   22.97    0.83
   2   3  -2   24.17    1.47
   2   3  -2   22.51    1.52
  -2  -3   2   22.51    1.55
  -2  -3   2   21.53    1.36
   1   3  -2   59.86    1.48
   1   3  -2   60.98    1.76
   1   3  -2   61.77    2.06
  -1  -3   2   57.81    2.20
  -1  -3   2   59.19    1.92
   0   3  -2    0.89    0.29
   0   3  -2    1.68    0.54
   0  -3   2    1.02    0.67
   0  -3   2    1.55    0.48
  -1   3  -2    8.83    0.75
  -1   3  -2    7.56    0.66
   1  -3   2    8.64    1.16
   1  -3   2    8.39    0.84
  -2   3  -2    4.21    0.48
  -2   3  -2    3.78    0.54
   2  -3   2    3.72    0.73
   2  -3   2    3.59    0.59
   2  -3   2    3.25    0.56
  -3   3  -2    7.41    0.55
  -3   3  -2    7.73    0.67
   3  -3   2    7.83    1.23
   3  -3   2    7.78    1.00
   3  -3   2    7.55    0.96
  -4   3  -2    1.34    0.35
   4  -3   2    1.49    0.80
   4  -3   2    1.66    0.68
   4  -3   2    1.49    0.59
   4  -3   2    1.61    0.32
  -5   3  -2    3.79    0.53
  -5   3  -2    4.11    0.73
   5  -3   2    4.90    0.61
   5  -3   2    6.29    1.25
   5  -3   2    4.02    1.09
  -6   3  -2    0.21    0.44
  -6   3  -2    0.28    0.38
   6  -3   2    0.37    0.95
   6  -3   2    0.39    0.37
   6  -3   2    1.04    1.09
  -7   3  -2   -0.49    0.52
  -7   3  -2   -0.57    0.68
   7  -3   2    1.63    1.43
   7  -3   2    0.45    1.23
  -8   3  -2   -1.26    1.20
   8  -3   2   -2.77    1.90
   8  -3   2   -0.11    1.88
  -9   3  -2   -3.18    1.95
   9  -3   2   -0.86    2.35
   9  -3   2   -3.03    2.76
  10  -3   2   -0.50    3.02
  10   2  -2    0.72    3.08
 -10  -2   2   -6.25    3.43
   9   2  -2   -0.49    2.75
  -9  -2   2   -4.86    2.84
  -9  -2   2   -2.22    2.53
   8   2  -2    4.30    1.23
   8   2  -2    2.63    2.36
  -8  -2   2    2.94    2.06
  -8  -2   2    4.02    2.38
   7   2  -2    2.86    1.09
   7   2  -2    2.36    1.77
  -7  -2   2    3.50    1.62
  -7  -2   2    2.65    1.44
   6   2  -2    7.05    1.65
   6   2  -2    7.05    1.27
  -6  -2   2    8.37    1.48
  -6  -2   2    7.65    1.46
   5   2  -2    1.08    0.99
   5   2  -2    1.30    0.84
  -5  -2   2    2.10    0.89
  -5  -2   2    1.89    0.76
   4   2  -2   10.02    1.48
   4   2  -2    7.25    1.27
  -4  -2   2   10.70    1.23
  -4  -2   2   11.38    1.46
   3   2  -2    3.66    0.80
   3   2  -2    3.67    0.84
  -3  -2   2    3.17    0.66
  -3  -2   2    4.57    0.35
  -3  -2   2    4.10    0.74
   2   2  -2    4.54    0.72
   2   2  -2    4.50    0.77
  -2  -2   2    5.22    0.81
  -2  -2   2    5.04    0.70
  -2  -2   2    5.92    0.40
   1   2  -2   11.09    0.95
   1   2  -2   12.56    1.08
  -1  -2   2   12.83    1.15
  -1  -2   2   11.70    0.58
  -1  -2   2   12.14    1.02
   0   2  -2  935.17   15.19
   0  -2   2  949.97   15.55
   0  -2   2 1000.00   15.14
   0  -2   2  997.17   16.47
  -1   2  -2    4.21    0.52
  -1   2  -2    3.52    0.51
   1  -2   2    3.16    0.63
   1  -2   2    3.88    0.50
   1  -2   2    3.92    0.45
   1  -2   2    2.73    0.44
  -2   2  -2    2.80    0.37
  -2   2  -2    3.34    0.44
   2  -2   2    3.58    0.55
   2  -2   2    4.27    0.69
   2  -2   2    3.46    0.67
  -3   2  -2   25.33    0.95
   3  -2   2   24.66    1.30
   3  -2   2   23.27    1.56
   3  -2   2   25.95    0.87
   3  -2   2   26.01    1.45
  -4   2  -2   18.78    0.87
  -4   2  -2   18.29    1.09
   4  -2   2   18.03    0.85
   4  -2   2   18.17    1.59
   4  -2   2   18.58    1.57
  -5   2  -2   12.86    0.86
  -5   2  -2   12.01    1.06
   5  -2   2   12.74    1.78
   5  -2   2   12.02    0.85
   5  -2   2   10.12    1.72
  -6   2  -2    2.71    0.70
  -6   2  -2    2.17    0.45
   6  -2   2    2.24    0.48
   6  -2   2    2.68    1.16
   6  -2   2    2.68    1.19
  -7   2  -2    5.13    1.12
   7  -2   2    3.90    1.66
   7  -2   2    4.23    1.74
  -8   2  -2    1.29    1.42
   8  -2   2    1.13    1.86
   8  -2   2   -0.31    1.95
  -9   2  -2    2.31    2.26
   9  -2   2    0.73    3.02
   9  -2   2    5.38    2.72
  10   1  -2    2.66    3.41
 -10  -1   2   -1.54    2.92
   9   1  -2    3.09    2.86
  -9  -1   2    1.25    3.03
  -9  -1   2    0.82    2.63
   8   1  -2    3.81    1.07
   8   1  -2    2.25    2.24
  -8  -1   2    1.91    2.15
  -8  -1   2    4.56    2.05
   7   1  -2   -0.07    0.70
   7   1  -2    0.56    1.53
  -7  -1   2    0.94    1.31
  -7  -1   2   -0.39    0.91
   6   1  -2    0.14    1.09
   6   1  -2    0.09    0.70
  -6  -1   2    0.33    0.90
  -6  -1   2   -0.34    0.54
   5   1  -2    2.11    1.07
   5   1  -2    2.09    0.81
  -5  -1   2    3.14    0.90
  -5  -1   2    2.28    0.69
   4   1  -2    2.35    0.70
   4   1  -2    2.38    0.92
  -4  -1   2    1.98    0.61
  -4  -1   2    2.71    0.75
   3   1  -2    0.56    0.52
   3   1  -2    0.68    0.61
  -3  -1   2    0.53    0.34
  -3  -1   2    0.70    0.15
  -3  -1   2    1.10    0.53
   2   1  -2   -0.15    0.49
   2   1  -2   -0.17    0.45
  -2  -1   2    0.00    0.41
  -2  -1   2    0.32    0.31
  -2  -1   2   -0.03    0.13
   1   1  -2    3.57    0.57
   1   1  -2    3.64    0.51
  -1  -1   2    3.95    0.55
  -1  -1   2    4.51    0.38
  -1  -1   2    5.80    0.65
   0   1  -2    1.05    0.29
   0   1  -2    1.15    0.27
   0   1  -2    0.54    0.26
   0  -1   2    0.97    0.36
   0  -1   2    1.09    0.28
   0  -1   2    1.37    0.32
   0  -1   2    1.20    0.22
  -1   1  -2  195.11    3.11
  -1   1  -2  204.60    3.48
   1  -1   2  189.61    3.01
   1  -1   2  188.84    3.30
   1  -1   2  200.28    3.44
   1  -1   2  199.48    3.64
   2  -1   2   45.80    1.72
   2  -1   2   46.95    1.47
   2  -1   2   50.50    1.64
   2  -1   2   48.39    1.17
   2  -1   2   48.33    1.19
  -3   1  -2    2.68    0.33
   3  -1   2    2.76    0.50
   3  -1   2    2.52    0.57
   3  -1   2    2.95    0.66
   3  -1   2    2.94    0.43
  -4   1  -2    0.67    0.22
  -4   1  -2    0.74    0.33
   4  -1   2    0.69    0.58
   4  -1   2    0.92    0.66
   4  -1   2    0.78    0.33
  -5   1  -2    1.04    0.30
  -5   1  -2    1.16    0.47
   5  -1   2    1.11    0.83
   5  -1   2    0.71    0.43
   5  -1   2    1.68    0.80
  -6   1  -2    5.72    0.71
  -6   1  -2    5.06    0.88
   6  -1   2    6.07    1.51
   6  -1   2    5.92    1.38
   6  -1   2    8.15    1.00
  -7   1  -2    0.50    0.74
   7  -1   2    0.49    1.29
   7  -1   2    0.51    1.31
   7  -1   2    0.31    0.49
  -8   1  -2   -0.15    1.15
   8  -1   2    0.76    1.91
   8  -1   2   -0.05    1.90
  -9   1  -2    5.46    2.41
   9  -1   2    6.46    2.88
  10  -1   2    1.00    3.07
  10   0  -2    0.61    3.04
 -10   0   2    1.04    2.47
   9   0  -2    1.17    2.66
  -9   0   2    1.52    2.12
  -9   0   2   -5.39    2.84
   8   0  -2    2.54    2.01
  -8   0   2    0.31    1.25
  -8   0   2   -2.74    1.92
   7   0  -2   -1.01    1.27
   7   0  -2    0.45    0.65
  -7   0   2   -0.05    0.71
  -7   0   2    1.27    1.23
   6   0  -2    1.99    1.20
   6   0  -2    1.18    0.70
  -6   0   2    1.09    0.67
  -6   0   2    1.07    0.86
   5   0  -2    0.52    0.65
   5   0  -2    0.98    0.97
  -5   0   2    0.33    0.51
  -5   0   2    1.61    0.76
   4   0  -2    5.29    0.79
   4   0  -2    4.35    1.02
  -4   0   2    8.78    1.16
  -4   0   2    6.38    0.36
   3   0  -2    1.28    0.48
   3   0  -2    1.59    0.58
   3   0  -2    1.33    0.65
  -3   0   2    1.72    0.52
  -3   0   2    1.43    0.20
   2   0  -2    5.68    0.82
   2   0  -2    5.67    0.79
   2   0  -2    4.04    0.78
  -2   0   2    7.10    0.85
  -2   0   2    5.34    0.39
   1   0  -2   90.29    2.35
   1   0  -2   91.58    1.85
  -1   0   2   89.10    1.53
  -1   0   2   91.10    1.78
  -1   0   2   86.96    1.91
   0   0  -2    3.86    0.44
   0   0  -2    3.62    0.32
   0   0   2    3.26    0.27
   0   0   2    3.68    0.37
   1   0   2  138.86    2.62
   1   0   2  130.65    2.25
   1   0   2  131.84    2.48
   1   0   2  129.30    2.17
   1   0   2  134.96    2.13
   2   0   2    3.83    0.59
   2   0   2    2.73    0.37
   2   0   2    3.49    0.56
   2   0   2    3.27    0.40
   2   0   2    3.76    0.57
  -3   0  -2   11.03    0.69
   3   0   2   11.81    1.14
   3   0   2   11.01    0.54
   3   0   2   11.23    1.11
   3   0   2   11.17    0.70
  -4   0  -2   16.71    0.97
  -4   0  -2   14.86    0.59
   4   0   2   16.35    1.49
   4   0   2   15.62    0.95
   4   0   2   15.40    1.49
  -5   0  -2    2.19    0.55
  -5   0  -2    1.67    0.28
   5   0   2    1.11    0.48
   5   0   2    1.69    0.83
   5   0   2    1.31    0.94
  -6   0  -2    0.25    0.27
  -6   0  -2    0.91    0.55
   6   0   2    0.84    0.94
   6   0   2    0.78    1.05
   6   0   2    0.67    0.49
  -7   0  -2   13.63    1.78
   7   0   2   13.25    1.25
   7   0   2   11.24    2.08
  -8   0  -2    5.73    1.51
  -8   0  -2    2.89    1.48
   8   0   2    3.46    1.99
  -9   0  -2    5.12    1.87
  -9   0  -2   -0.91    2.02
   9   0   2    1.45    2.38
 -10   0  -2   -5.48    2.65
 -10   0  -2    5.20    2.12
  10   0   2    1.43    2.95
  10  -1  -2    0.36    2.90
 -10   1   2    6.23    2.33
   9  -1  -2    0.77    2.62
  -9   1   2   -3.06    2.83
   8  -1  -2    1.10    2.13
  -8   1   2    4.04    1.31
  -8   1   2   -1.65    1.95
   7  -1  -2    0.63    1.37
   7  -1  -2    0.03    0.53
  -7   1   2    0.63    0.71
  -7   1   2    0.41    1.13
   6  -1  -2    0.49    0.54
   6  -1  -2   -0.55    1.09
   6  -1  -2    1.23    1.12
  -6   1   2   -0.06    0.72
   5  -1  -2    5.24    1.31
   5  -1  -2    8.00    1.37
   5  -1  -2    7.77    1.12
  -5   1   2    6.30    0.51
  -5   1   2    9.65    1.39
   4  -1  -2    2.96    0.87
   4  -1  -2    2.86    0.93
   4  -1  -2    3.06    0.60
  -4   1   2    3.57    0.68
  -4   1   2    3.71    0.45
   3  -1  -2    0.70    0.50
   3  -1  -2    0.61    0.38
   3  -1  -2    0.28    0.59
  -3   1   2    0.68    0.39
  -3   1   2    0.35    0.21
   2  -1  -2   -0.40    0.50
   2  -1  -2    0.07    0.32
   2  -1  -2    0.00    0.39
  -2   1   2    0.42    0.34
  -2   1   2   -0.06    0.20
   1  -1  -2    7.63    0.45
   1  -1  -2    7.46    0.91
   1  -1  -2    7.20    0.58
  -1   1   2    7.48    0.53
  -1   1   2    6.99    0.42
   0  -1  -2    3.84    0.45
   0  -1  -2    3.82    0.26
   0  -1  -2    3.85    0.28
   0   1   2    3.68    0.29
   0   1   2    3.56    0.26
   0   1   2    3.81    0.29
   0   1   2    3.84    0.27
  -1  -1  -2   72.81    1.52
   1   1   2   74.10    1.77
   1   1   2   72.34    1.30
   1   1   2   70.32    1.45
   1   1   2   73.58    1.24
  -2  -1  -2  117.53    2.07
   2   1   2  117.48    2.88
   2   1   2  118.10    1.88
   2   1   2  119.89    2.32
  -3  -1  -2   20.37    0.85
   3   1   2   18.83    1.32
   3   1   2   20.29    0.61
   3   1   2   20.83    1.01
   3   1   2   19.75    1.38
  -4  -1  -2    2.41    0.26
  -4  -1  -2    2.05    0.43
   4   1   2    2.22    0.74
   4   1   2    1.77    0.47
   4   1   2    1.71    0.72
  -5  -1  -2    3.08    0.61
  -5  -1  -2    2.46    0.69
   5   1   2    3.47    0.64
   5   1   2    3.18    0.98
  -6  -1  -2    0.39    0.57
  -6  -1  -2    0.33    0.56
   6   1   2    0.44    0.89
   6   1   2    0.19    0.52
  -7  -1  -2    0.85    0.80
  -7  -1  -2    1.04    0.84
   7   1   2    0.62    0.60
   7   1   2    0.26    1.20
  -8  -1  -2   -1.50    1.05
  -8  -1  -2    0.64    1.15
   8   1   2    0.46    0.63
   8   1   2    1.54    1.79
  -9  -1  -2   -3.85    1.71
  -9  -1  -2    0.58    1.41
   9   1   2   -1.74    2.30
 -10  -1  -2    1.30    2.32
  10   1   2    1.53    2.93
  10  -2  -2    3.22    3.17
 -10   2   2   -4.80    3.43
   9  -2  -2    1.98    2.61
   8  -2  -2   -0.29    1.83
  -8   2   2   -1.20    1.72
   7  -2  -2    1.87    1.68
   7  -2  -2    1.53    1.64
  -7   2   2    3.45    1.39
   6  -2  -2   21.15    1.32
   6  -2  -2   21.97    2.65
   6  -2  -2   18.08    2.66
  -6   2   2   21.63    2.11
   5  -2  -2   42.27    1.55
   5  -2  -2   39.57    2.60
   5  -2  -2   40.29    2.87
  -5   2   2   40.24    2.03
  -5   2   2   39.46    1.25
   4  -2  -2    0.04    0.69
   4  -2  -2    0.31    0.61
   4  -2  -2    0.45    0.38
  -4   2   2    0.71    0.45
  -4   2   2    0.43    0.29
   3  -2  -2   19.45    0.86
   3  -2  -2   20.55    1.44
   3  -2  -2   20.18    1.67
  -3   2   2   19.07    0.83
  -3   2   2   19.60    1.08
   2  -2  -2  170.89    3.74
   2  -2  -2  177.04    4.25
   2  -2  -2  170.02    2.67
  -2   2   2  169.26    2.77
  -2   2   2  172.07    3.18
  -2   2   2  147.15    2.72
   1  -2  -2  390.10    6.94
   1  -2  -2  387.51    7.43
   1  -2  -2  376.95    5.94
   1  -2  -2  379.13    5.87
  -1   2   2  377.65    6.90
  -1   2   2  381.67    5.99
   0  -2  -2   12.01    0.39
   0  -2  -2   12.24    0.78
   0  -2  -2   12.63    0.69
   0   2   2   12.58    0.40
   0   2   2   12.85    0.49
   0   2   2   13.30    0.54
  -1  -2  -2  515.34   10.63
   1   2   2  527.90   11.31
   1   2   2  523.76    8.04
   1   2   2  528.64    7.95
  -2  -2  -2   23.10    0.70
  -2  -2  -2   22.48    1.10
   2   2   2   22.34    1.29
   2   2   2   22.26    1.04
   2   2   2   21.63    0.67
  -3  -2  -2   34.21    1.52
  -3  -2  -2   35.77    1.12
   3   2   2   35.15    0.78
   3   2   2   34.80    1.37
   3   2   2   36.14    1.81
  -4  -2  -2   23.14    1.44
  -4  -2  -2   23.21    1.13
   4   2   2   23.44    1.30
   4   2   2   23.01    1.77
  -5  -2  -2    3.58    0.80
  -5  -2  -2    5.15    0.76
   5   2   2    4.95    1.15
   5   2   2    5.07    0.84
  -6  -2  -2   35.61    1.94
  -6  -2  -2   35.73    2.25
   6   2   2   34.99    1.97
   6   2   2   32.97    2.84
  -7  -2  -2    4.97    1.31
  -7  -2  -2    4.36    1.04
   7   2   2    3.83    0.94
   7   2   2    1.98    1.32
  -8  -2  -2    3.98    1.61
  -8  -2  -2    2.01    1.37
   8   2   2    2.10    0.85
   8   2   2    1.31    1.83
  -9  -2  -2   -1.84    1.91
   9   2   2    0.06    2.32
 -10  -2  -2    0.69    2.60
  10   2   2    0.57    3.15
   9  -3  -2    0.95    2.70
  -9   3   2   -5.85    2.57
   8  -3  -2    1.33    2.47
   8  -3  -2    4.73    2.33
  -8   3   2   -2.33    1.73
   7  -3  -2   11.23    2.48
   7  -3  -2   12.39    2.46
  -7   3   2   12.91    2.01
   6  -3  -2    4.05    1.53
   6  -3  -2    3.60    1.34
  -6   3   2    3.36    0.92
  -6   3   2    2.48    0.48
   5  -3  -2    2.83    0.44
   5  -3  -2    2.70    1.03
   5  -3  -2    3.00    1.16
  -5   3   2    2.26    0.50
  -5   3   2    2.69    0.70
   4  -3  -2   86.02    1.76
   4  -3  -2   87.33    3.29
   4  -3  -2   89.21    3.64
  -4   3   2   89.67    2.64
  -4   3   2   84.94    2.05
   3  -3  -2  111.81    3.63
   3  -3  -2  107.47    3.30
   3  -3  -2  110.22    1.83
  -3   3   2  105.03    2.25
  -3   3   2  108.84    1.77
  -3   3   2  105.70    2.65
   2  -3  -2    4.13    0.72
   2  -3  -2    4.46    0.89
  -2   3   2    4.31    0.56
  -2   3   2    3.53    0.45
   1  -3  -2   11.39    1.24
   1  -3  -2    9.70    1.04
   1  -3  -2    9.82    0.42
  -1   3   2   10.38    0.60
  -1   3   2   10.32    0.38
  -1   3   2   10.97    0.78
   0  -3  -2    2.12    0.54
   0  -3  -2    2.98    0.54
   0   3   2    2.30    0.34
   0   3   2    2.20    0.33
   0   3   2    2.87    0.33
  -1  -3  -2   27.93    1.37
   1   3   2   28.60    1.09
   1   3   2   28.66    0.93
  -2  -3  -2    0.68    0.29
  -2  -3  -2    0.62    0.44
   2   3   2    0.37    0.27
   2   3   2    0.56    0.45
   2   3   2    0.11    0.37
  -3  -3  -2   40.38    1.80
  -3  -3  -2   41.17    1.29
   3   3   2   40.56    0.95
   3   3   2   42.47    1.67
   3   3   2   41.00    1.96
  -4  -3  -2    1.39    0.57
  -4  -3  -2    1.54    0.50
   4   3   2    0.94    0.53
   4   3   2    1.27    0.71
  -5  -3  -2   37.19    1.81
  -5  -3  -2   35.16    2.14
   5   3   2   34.08    1.91
   5   3   2   35.43    2.57
  -6  -3  -2    0.15    0.69
  -6  -3  -2   -0.03    0.61
   6   3   2   -0.01    0.95
   6   3   2   -0.10    0.65
  -7  -3  -2   -0.03    0.83
  -7  -3  -2    0.32    0.93
   7   3   2    0.62    0.79
   7   3   2   -0.44    1.21
  -8  -3  -2    1.14    1.63
  -8  -3  -2   -0.34    1.15
   8   3   2    0.48    0.84
   8   3   2    2.19    2.01
  -9  -3  -2   -0.48    1.84
  -9  -3  -2   -0.05    2.28
   9   3   2    0.26    2.61
   9   3   2    2.18    1.11
 -10  -3  -2   -1.10    2.96
  10   3   2   -0.27    3.13
   9  -4  -2   -2.53    3.21
   9  -4  -2   -0.01    2.65
  -9   4   2   -3.27    2.65
   8  -4  -2    0.96    2.61
   8  -4  -2    1.80    2.25
  -8   4   2    0.94    2.04
   7  -4  -2    7.27    2.23
   7  -4  -2    7.39    2.21
  -7   4   2    7.27    1.66
   6  -4  -2   38.34    3.40
   6  -4  -2   41.28    3.27
  -6   4   2   39.13    1.63
  -6   4   2   44.42    2.47
   5  -4  -2    2.94    1.18
   5  -4  -2    3.45    1.16
  -5   4   2    3.65    0.77
  -5   4   2    3.19    0.62
   4  -4  -2    4.80    1.05
   4  -4  -2    5.09    1.18
  -4   4   2    6.83    0.90
  -4   4   2    7.07    0.97
   3  -4  -2   17.92    1.68
   3  -4  -2   18.34    1.57
  -3   4   2   19.43    1.15
  -3   4   2   19.23    1.10
   2  -4  -2   33.63    1.88
   2  -4  -2   31.96    1.73
  -2   4   2   33.64    1.25
  -2   4   2   34.00    1.29
   1  -4  -2   19.54    1.45
   1  -4  -2   19.36    1.40
   1  -4  -2   19.04    0.70
  -1   4   2   19.61    1.02
  -1   4   2   18.42    0.62
  -1   4   2   19.28    0.87
   0  -4  -2   48.36    1.81
   0  -4  -2   45.23    1.98
   0  -4  -2   46.86    1.26
   0   4   2   46.43    1.29
   0   4   2   46.24    1.40
  -1  -4  -2  127.84    2.14
  -1  -4  -2  123.44    3.32
  -1  -4  -2  126.74    2.94
   1   4   2  122.30    2.60
   1   4   2  123.18    2.35
  -2  -4  -2    7.78    1.11
  -2  -4  -2    6.12    0.60
   2   4   2    6.04    0.82
   2   4   2    6.61    0.64
   2   4   2    6.52    0.98
  -3  -4  -2    1.28    0.58
  -3  -4  -2    1.56    0.44
   3   4   2    1.54    0.32
   3   4   2    1.11    0.52
   3   4   2    1.18    0.60
  -4  -4  -2    2.36    0.60
  -4  -4  -2    1.72    0.72
   4   4   2    1.29    0.61
   4   4   2    1.87    0.25
   4   4   2    1.51    0.78
  -5  -4  -2    1.79    0.71
  -5  -4  -2    1.27    0.75
   5   4   2    2.07    0.93
   5   4   2    1.77    0.85
  -6  -4  -2   11.49    1.62
  -6  -4  -2    8.76    1.52
   6   4   2    8.17    1.72
   6   4   2   12.19    1.75
  -7  -4  -2   -0.20    0.85
  -7  -4  -2    1.00    1.18
   7   4   2    1.03    0.89
   7   4   2    2.02    1.47
  -8  -4  -2   -0.39    1.67
  -8  -4  -2    0.30    1.16
   8   4   2    1.67    1.11
   8   4   2    0.74    1.99
  -9  -4  -2   -1.27    1.64
  -9  -4  -2   -1.48    2.55
   9   4   2    1.22    2.78
   9   4   2    0.06    1.11
  10   4   2    1.03    3.15
  10  -5  -2   -1.76    3.78
  10  -5  -2    2.53    3.27
   9  -5  -2   -2.77    3.17
   9  -5  -2    9.37    2.94
   8  -5  -2    1.30    2.37
   8  -5  -2   -1.49    2.44
  -8   5   2   -2.49    1.86
   7  -5  -2    0.61    1.79
   7  -5  -2   -0.91    1.46
  -7   5   2    0.42    1.18
   6  -5  -2    2.04    1.31
   6  -5  -2    1.29    1.25
  -6   5   2    0.58    0.54
  -6   5   2    0.34    0.71
   5  -5  -2    0.86    1.03
   5  -5  -2    1.35    0.96
  -5   5   2    0.86    0.55
  -5   5   2    1.00    0.57
   4  -5  -2    3.56    1.03
   4  -5  -2    3.66    1.17
  -4   5   2    3.03    0.65
  -4   5   2    3.30    0.66
   3  -5  -2    3.99    0.96
   3  -5  -2    3.20    0.85
  -3   5   2    3.42    0.61
  -3   5   2    3.41    0.60
   2  -5  -2    2.12    0.75
   2  -5  -2    1.85    0.70
  -2   5   2    1.99    0.49
  -2   5   2    1.72    0.38
   1  -5  -2   36.03    1.37
   1  -5  -2   37.09    1.95
   1  -5  -2   36.27    1.81
  -1   5   2   36.59    1.00
  -1   5   2   36.35    1.40
   0  -5  -2    1.28    0.34
   0  -5  -2    1.28    0.55
   0  -5  -2    0.33    0.68
   0   5   2    1.57    0.43
   0   5   2    1.08    0.36
  -1  -5  -2   16.59    0.74
  -1  -5  -2   15.71    1.02
  -1  -5  -2   16.69    1.57
   1   5   2   15.81    0.93
   1   5   2   16.71    1.03
  -2  -5  -2    1.41    0.69
  -2  -5  -2    1.32    0.35
   2   5   2    1.00    0.36
   2   5   2    1.40    0.54
   2   5   2    0.65    0.48
  -3  -5  -2   20.33    1.11
  -3  -5  -2   22.94    1.77
   3   5   2   21.16    0.94
   3   5   2   22.24    1.47
   3   5   2   21.54    1.65
  -4  -5  -2   -0.28    0.51
  -4  -5  -2    0.43    0.66
   4   5   2    0.06    0.31
   4   5   2    0.36    0.69
   4   5   2    0.83    0.76
  -5  -5  -2    1.01    0.87
  -5  -5  -2    1.17    0.69
   5   5   2   -0.12    0.87
   5   5   2   -0.07    0.69
  -6  -5  -2    5.72    1.44
  -6  -5  -2    4.90    1.00
   6   5   2    3.40    1.41
   6   5   2    4.93    1.19
  -7  -5  -2    2.35    0.99
  -7  -5  -2    1.49    1.49
   7   5   2    2.97    1.83
   7   5   2    3.01    1.23
  -8  -5  -2    3.79    2.48
  -8  -5  -2    4.57    1.41
   8   5   2    3.24    2.43
   8   5   2    5.32    1.57
  -9  -5  -2    2.74    3.30
  -9  -5  -2    2.36    2.02
   9   5   2    2.72    3.05
   9   5   2    5.67    1.84
  10   5   2   -0.16    3.15
  10   5   2    2.27    1.78
   9  -6  -2    2.31    2.90
   9  -6  -2   -2.69    3.39
  -9   6   2   -5.51    2.60
   8  -6  -2    1.10    2.31
   8  -6  -2    0.77    2.79
  -8   6   2   -1.91    1.86
   7  -6  -2    3.81    2.14
   7  -6  -2    7.14    2.48
  -7   6   2    4.54    1.70
   6  -6  -2    2.39    1.40
   6  -6  -2    1.64    1.33
  -6   6   2    1.99    0.70
  -6   6   2    1.59    0.92
   5  -6  -2    4.00    1.34
   5  -6  -2    3.35    1.23
  -5   6   2    3.93    0.83
  -5   6   2    3.99    0.79
   4  -6  -2    5.57    1.34
   4  -6  -2    5.77    1.26
  -4   6   2    6.04    0.83
  -4   6   2    7.21    1.01
   3  -6  -2   11.30    1.71
   3  -6  -2    9.78    1.53
  -3   6   2   11.30    0.97
  -3   6   2   12.81    1.27
   2  -6  -2    2.37    0.83
   2  -6  -2    2.53    0.84
  -2   6   2    2.39    0.59
   1  -6  -2   12.14    1.43
   1  -6  -2   13.13    1.56
   1  -6  -2   12.86    0.99
  -1   6   2   13.09    1.10
  -1   6   2   12.43    0.74
   0  -6  -2    2.80    0.69
   0  -6  -2    2.69    0.47
   0  -6  -2    1.63    0.82
   0   6   2    2.35    0.49
   0   6   2    2.11    0.52
  -1  -6  -2    2.73    0.57
  -1  -6  -2    3.17    0.96
  -1  -6  -2    3.00    0.46
   1   6   2    2.57    0.58
   1   6   2    2.73    0.52
  -2  -6  -2    1.61    0.87
  -2  -6  -2    1.24    0.39
   2   6   2    1.17    0.55
   2   6   2    0.81    0.56
   2   6   2    0.96    0.43
  -3  -6  -2    8.01    0.92
  -3  -6  -2    6.16    1.24
   3   6   2    5.89    0.93
   3   6   2    8.75    0.92
   3   6   2    8.56    1.42
  -4  -6  -2    1.23    0.63
  -4  -6  -2    1.69    0.98
   4   6   2    1.08    0.42
   4   6   2    0.93    0.83
   4   6   2    0.65    0.74
  -5  -6  -2   -0.02    0.64
  -5  -6  -2    0.39    0.94
   5   6   2   -0.50    0.99
   5   6   2   -0.12    0.79
  -6  -6  -2   11.76    1.60
  -6  -6  -2   10.39    2.01
   6   6   2   10.46    1.60
   6   6   2   10.49    2.15
  -7  -6  -2    4.93    1.13
  -7  -6  -2    5.03    2.04
   7   6   2    8.00    1.73
   7   6   2    7.13    2.42
  -8  -6  -2   -0.07    1.06
  -8  -6  -2   -3.25    2.26
   8   6   2    1.78    1.58
   8   6   2    1.24    2.51
  -9  -6  -2   -5.02    3.28
   9   6   2    2.93    1.75
   9   6   2   -0.13    3.18
  10   6   2    5.36    1.95
  10   6   2    4.67    3.64
   9  -7  -2    5.23    3.05
   9  -7  -2   -0.48    3.49
  -9   7   2   -3.39    2.67
   8  -7  -2   -0.29    2.71
   8  -7  -2    2.42    2.56
  -8   7   2   -3.10    1.93
   7  -7  -2    1.75    1.78
   7  -7  -2   -0.47    2.02
  -7   7   2   -0.35    0.60
  -7   7   2   -1.05    1.28
   6  -7  -2   -0.45    1.24
   6  -7  -2    0.29    1.44
  -6   7   2    0.22    0.84
  -6   7   2    0.34    0.64
   5  -7  -2    1.29    1.06
   5  -7  -2    0.44    1.06
  -5   7   2    0.94    0.60
  -5   7   2    1.26    0.70
   4  -7  -2    0.59    0.90
   4  -7  -2    0.23    0.82
  -4   7   2    0.56    0.47
  -4   7   2    0.42    0.62
   3  -7  -2   14.15    1.92
   3  -7  -2   13.93    1.85
  -3   7   2   15.66    1.47
  -3   7   2   12.96    1.09
   2  -7  -2    0.76    0.72
   2  -7  -2    0.79    0.54
   2  -7  -2    0.05    0.76
  -2   7   2    0.85    0.26
  -2   7   2    1.25    0.62
   1  -7  -2    5.73    0.97
   1  -7  -2    4.53    1.10
   1  -7  -2    6.21    0.87
  -1   7   2    5.36    0.71
  -1   7   2    4.94    0.73
   0  -7  -2    0.88    0.82
   0  -7  -2    1.44    0.42
   0  -7  -2    1.81    0.67
   0   7   2    1.40    0.56
   0   7   2    0.74    0.45
  -1  -7  -2    5.90    1.21
  -1  -7  -2    6.95    0.75
  -1  -7  -2    6.39    0.93
   1   7   2    5.40    0.71
   1   7   2    4.70    0.79
  -2  -7  -2    0.62    0.45
  -2  -7  -2    1.04    0.96
  -2  -7  -2    0.84    0.42
   2   7   2    0.71    0.63
   2   7   2    0.52    0.48
  -3  -7  -2    1.36    0.54
  -3  -7  -2    1.75    1.11
   3   7   2    1.67    0.81
   3   7   2    1.43    0.82
   3   7   2    1.12    0.51
  -4  -7  -2   29.92    1.63
  -4  -7  -2   29.54    2.79
   4   7   2   29.38    2.44
   4   7   2   28.98    2.23
   4   7   2   29.35    1.37
  -5  -7  -2    0.39    1.25
  -5  -7  -2    0.53    0.67
   5   7   2   -0.03    1.09
   5   7   2    0.75    0.97
  -6  -7  -2    2.32    1.55
  -6  -7  -2    1.56    0.81
   6   7   2    1.31    1.57
   6   7   2    1.70    1.14
  -7  -7  -2    0.46    0.79
  -7  -7  -2   -1.95    2.05
   7   7   2    0.06    2.00
   7   7   2    1.24    1.37
  -8  -7  -2   -0.92    3.17
   8   7   2   -1.81    2.62
   8   7   2    1.73    1.60
   9   7   2    2.06    1.95
   9   7   2    2.28    3.19
   9  -8  -2   -1.20    3.54
   9  -8  -2    3.54    3.00
   8  -8  -2    3.08    2.58
   8  -8  -2    0.24    3.22
  -8   8   2   -3.57    2.01
   7  -8  -2    3.24    1.97
   7  -8  -2    0.22    2.38
  -7   8   2    0.66    0.83
  -7   8   2    1.03    1.67
   6  -8  -2    2.63    1.87
   6  -8  -2    2.85    1.46
  -6   8   2    1.37    0.84
  -6   8   2    2.72    1.24
   5  -8  -2   10.58    1.81
   5  -8  -2   10.40    2.05
  -5   8   2   11.78    1.65
  -5   8   2   12.27    1.77
   4  -8  -2   -0.23    0.87
   4  -8  -2   -0.21    0.89
  -4   8   2    0.03    0.69
  -4   8   2    0.15    0.47
   3  -8  -2    4.45    1.11
   3  -8  -2    4.77    1.33
  -3   8   2    4.87    0.90
  -3   8   2    3.99    0.76
   2  -8  -2   13.02    2.01
   2  -8  -2   14.49    1.85
   2  -8  -2   15.76    1.49
  -2   8   2   16.03    1.58
  -2   8   2   14.69    0.84
   1  -8  -2   14.45    2.01
   1  -8  -2   15.74    1.77
   1  -8  -2   18.07    1.41
  -1   8   2   15.94    1.10
  -1   8   2   17.59    1.54
   0  -8  -2    1.95    1.11
   0  -8  -2    1.66    0.80
   0  -8  -2    1.81    0.52
   0   8   2    1.18    0.59
   0   8   2    2.22    0.68
  -1  -8  -2   23.17    1.28
  -1  -8  -2   23.76    1.67
  -1  -8  -2   23.68    2.51
   1   8   2   23.20    1.61
   1   8   2   22.73    1.65
  -2  -8  -2    5.95    1.49
  -2  -8  -2    7.20    1.00
   2   8   2    5.25    1.05
   2   8   2    5.88    0.83
  -3  -8  -2    1.10    1.16
  -3  -8  -2   -0.34    0.46
   3   8   2   -0.02    0.82
   3   8   2   -0.05    0.74
   3   8   2    0.15    0.57
  -4  -8  -2    3.12    0.75
  -4  -8  -2    3.52    1.50
   4   8   2    2.53    0.65
   4   8   2    3.55    1.17
   4   8   2    3.30    1.13
  -5  -8  -2    2.71    0.77
  -5  -8  -2    2.47    1.61
   5   8   2    2.75    1.40
   5   8   2    2.09    1.17
  -6  -8  -2    2.08    2.05
  -6  -8  -2    2.21    0.83
   6   8   2    2.13    1.75
   6   8   2    2.69    1.43
  -7  -8  -2   -3.24    2.48
   7   8   2    1.99    1.69
   7   8   2   -1.14    2.07
  -8  -8  -2    1.42    3.64
   8   8   2    5.36    3.21
   8   8   2    7.62    2.34
  -9  -8  -2   -5.89    3.86
   9   8   2    5.76    2.23
   9   8   2    1.99    3.40
   9  -9  -2   -1.53    3.56
   9  -9  -2    2.41    2.95
   8  -9  -2   -0.54    3.03
   8  -9  -2    3.02    2.53
  -8   9   2   -3.57    2.26
   7  -9  -2    0.80    1.85
   7  -9  -2   -0.63    2.61
  -7   9   2   -2.11    1.57
  -7   9   2    0.08    0.90
   6  -9  -2    1.90    1.22
   6  -9  -2    1.73    2.09
  -6   9   2   -0.09    0.87
  -6   9   2    0.12    1.12
   5  -9  -2   -0.14    1.27
   5  -9  -2    0.57    0.96
  -5   9   2   -0.32    0.76
  -5   9   2   -0.66    0.81
   4  -9  -2   17.27    2.22
   4  -9  -2   19.88    2.77
  -4   9   2   19.58    1.65
  -4   9   2   19.30    2.17
   3  -9  -2    1.04    1.13
   3  -9  -2    1.77    0.98
  -3   9   2    0.95    0.82
   2  -9  -2   13.63    2.22
   2  -9  -2   13.74    1.87
   2  -9  -2   14.46    1.56
  -2   9   2   14.97    1.78
  -2   9   2   13.86    0.96
   1  -9  -2    2.94    0.79
   1  -9  -2    2.33    0.96
   1  -9  -2    2.25    1.17
  -1   9   2    2.17    0.59
  -1   9   2    2.33    0.82
   0  -9  -2    0.80    0.82
   0  -9  -2    0.36    1.13
   0  -9  -2    0.14    0.46
   0   9   2   -0.17    0.59
   0   9   2    1.34    0.73
  -1  -9  -2    3.68    0.72
  -1  -9  -2    3.40    0.85
  -1  -9  -2    2.65    1.36
   1   9   2    4.38    0.90
   1   9   2    3.80    0.92
  -2  -9  -2    8.07    1.76
  -2  -9  -2   10.30    1.33
  -2  -9  -2   10.28    1.12
   2   9   2   11.30    1.54
   2   9   2    8.99    1.31
  -3  -9  -2    5.02    0.92
  -3  -9  -2    6.20    0.87
  -3  -9  -2    5.24    1.76
   3   9   2    4.13    1.22
   3   9   2    5.74    0.88
  -4  -9  -2    8.98    1.21
  -4  -9  -2    5.50    1.79
   4   9   2    7.12    0.87
   4   9   2    7.55    1.46
   4   9   2    7.79    1.51
  -5  -9  -2    0.73    0.61
  -5  -9  -2   -0.55    1.68
   5   9   2    0.09    1.14
   5   9   2    0.55    1.25
  -6  -9  -2    0.38    0.95
  -6  -9  -2   -2.09    2.44
   6   9   2   -0.34    1.76
   6   9   2    0.53    1.41
  -7  -9  -2   -5.29    3.02
   7   9   2    0.25    2.49
   7   9   2    1.76    1.83
  -8  -9  -2   -3.75    3.90
   8   9   2    6.34    2.24
   8   9   2    0.46    3.21
   9   9   2    4.58    2.38
   9   9   2   -1.04    3.47
   8 -10  -2    0.13    3.41
   8 -10  -2    6.25    2.62
  -8  10   2   -4.93    2.19
   7 -10  -2    5.01    1.96
   7 -10  -2    3.16    3.08
  -7  10   2    2.10    1.38
  -7  10   2    4.32    2.15
   6 -10  -2    4.14    1.49
   6 -10  -2    8.40    2.82
  -6  10   2    5.10    1.51
  -6  10   2    3.95    1.85
   5 -10  -2    0.66    0.92
   5 -10  -2   -0.60    1.77
  -5  10   2    0.14    0.88
  -5  10   2   -0.87    1.00
   4 -10  -2    0.56    1.24
   4 -10  -2    0.84    0.92
  -4  10   2    0.38    0.62
  -4  10   2    0.05    0.92
   3 -10  -2   -0.35    1.10
   3 -10  -2    0.24    0.78
  -3  10   2    0.07    0.88
   2 -10  -2    2.19    0.86
   2 -10  -2    1.88    1.25
   2 -10  -2    2.18    0.97
  -2  10   2    2.22    0.94
  -2  10   2    1.74    0.51
   1 -10  -2   -0.17    0.59
   1 -10  -2    0.18    0.88
   1 -10  -2   -0.71    1.13
  -1  10   2   -0.01    0.51
  -1  10   2    0.79    0.81
   0 -10  -2   47.74    2.58
   0 -10  -2   47.91    2.18
   0 -10  -2   48.91    3.56
   0  10   2   48.12    2.27
   0  10   2   49.95    2.73
  -1 -10  -2   30.49    2.24
  -1 -10  -2   34.33    3.33
  -1 -10  -2   30.70    1.77
   1  10   2   30.40    2.19
   1  10   2   28.83    2.20
  -2 -10  -2    1.45    0.76
  -2 -10  -2    1.23    1.36
  -2 -10  -2    1.32    0.60
   2  10   2    1.69    0.84
   2  10   2    1.26    1.07
  -3 -10  -2    0.04    0.52
  -3 -10  -2   -0.18    0.45
  -3 -10  -2   -0.58    1.50
   3  10   2    0.32    0.69
   3  10   2   -0.22    1.05
  -4 -10  -2    0.72    0.58
  -4 -10  -2    0.83    1.92
   4  10   2   -0.87    0.94
   4  10   2   -0.23    1.12
   4  10   2    0.48    0.63
  -5 -10  -2    5.85    0.96
  -5 -10  -2    9.08    2.91
   5  10   2    7.75    1.87
   5  10   2    9.20    2.08
  -6 -10  -2   -0.81    2.96
   6  10   2   -0.07    1.77
   6  10   2    2.63    1.81
  -7 -10  -2   -4.74    3.82
   7  10   2    4.23    2.31
   7  10   2   -0.56    2.54
  -8 -10  -2   -7.79    4.45
   8  10   2    2.57    2.27
   8  10   2   -1.33    3.31
   8 -11  -2    2.61    3.52
  -8  11   2   -1.64    2.34
   7 -11  -2   -2.46    3.11
  -7  11   2   -2.05    1.43
  -7  11   2   -2.31    1.98
   6 -11  -2    0.70    2.61
  -6  11   2   -0.06    1.41
  -6  11   2   -1.04    1.50
   5 -11  -2    1.30    1.97
  -5  11   2   -0.38    1.29
  -5  11   2   -1.12    0.98
   4 -11  -2    2.37    1.91
  -4  11   2    2.60    1.04
  -4  11   2    1.37    1.29
   3 -11  -2    1.24    1.07
   3 -11  -2    1.89    1.53
  -3  11   2    1.16    1.12
   2 -11  -2    9.48    1.42
   2 -11  -2    8.16    2.02
  -2  11   2    8.33    1.45
   1 -11  -2    2.00    0.83
   1 -11  -2    0.64    1.40
  -1  11   2    2.36    1.09
  -1  11   2    1.83    0.65
   0 -11  -2    1.71    0.68
   0 -11  -2    1.10    1.41
   0  11   2    0.89    0.97
   0  11   2    0.96    0.76
  -1 -11  -2    4.27    0.86
  -1 -11  -2    3.43    1.13
  -1 -11  -2    4.89    1.82
   1  11   2    4.58    1.15
   1  11   2    3.82    1.17
  -2 -11  -2   -0.28    1.58
  -2 -11  -2    0.05    0.49
  -2 -11  -2   -0.21    0.70
   2  11   2   -0.29    0.86
   2  11   2    0.09    1.01
  -3 -11  -2   -0.18    0.49
  -3 -11  -2   -0.07    1.81
  -3 -11  -2    0.25    0.63
   3  11   2   -1.07    1.13
   3  11   2   -0.14    0.77
  -4 -11  -2    2.35    0.74
  -4 -11  -2    2.52    2.47
  -4 -11  -2    3.11    0.73
   4  11   2    4.61    1.75
   4  11   2    2.42    0.85
  -5 -11  -2    4.96    3.34
   5  11   2    4.95    1.87
   5  11   2    3.11    1.51
  -6 -11  -2   -4.26    3.70
   6  11   2    0.54    1.78
   6  11   2    0.13    1.99
  -7 -11  -2   -6.02    4.25
   7  11   2    4.37    2.45
   7  11   2   -3.64    2.51
  -8 -11  -2   -2.02    4.82
   8  11   2   -4.27    3.06
   8  11   2    2.64    2.31
   7 -12  -2    0.66    3.49
  -7  12   2   -1.13    1.96
  -7  12   2   -0.69    1.91
   6 -12  -2    4.06    3.29
  -6  12   2   -1.57    1.71
  -6  12   2    0.87    1.78
   5 -12  -2    4.98    2.81
  -5  12   2    3.43    1.86
  -5  12   2    7.98    1.95
   4 -12  -2    4.34    2.46
  -4  12   2    1.53    1.65
  -4  12   2    7.62    1.44
   3 -12  -2    1.28    1.23
   3 -12  -2    3.36    2.20
  -3  12   2    1.38    1.45
   2 -12  -2    2.36    1.89
   2 -12  -2    0.60    0.95
  -2  12   2    2.07    1.36
   1 -12  -2    2.86    1.97
   1 -12  -2    1.07    0.79
  -1  12   2    0.78    0.66
  -1  12   2   -0.12    1.20
   0 -12  -2    0.46    0.62
   0 -12  -2    0.83    1.67
   0  12   2   -0.32    1.22
   0  12   2    0.16    0.76
  -1 -12  -2   -0.14    0.50
  -1 -12  -2   -0.14    1.85
   1  12   2   -0.70    1.20
   1  12   2    1.05    1.01
  -2 -12  -2    0.31    0.57
  -2 -12  -2   -1.13    2.00
   2  12   2    1.88    1.33
   2  12   2   -0.48    1.10
  -3 -12  -2    1.18    2.35
  -3 -12  -2    0.15    0.55
   3  12   2   -0.89    0.89
   3  12   2    0.45    1.38
  -4 -12  -2    2.87    3.44
   4  12   2    1.26    0.88
   4  12   2    4.04    1.87
  -5 -12  -2   -2.75    3.51
   5  12   2    2.04    2.13
  -6 -12  -2   -3.31    4.46
   6  12   2    3.86    2.40
  -7 -12  -2   -5.26    4.69
   7  12   2    3.37    2.65
   7 -13  -2    2.04    3.66
  -7  13   2   -4.69    1.95
  -7  13   2   -1.56    2.20
   6 -13  -2    3.14    3.29
  -6  13   2   -1.34    2.02
   5 -13  -2    1.25    2.85
  -5  13   2    3.78    1.63
  -5  13   2   -1.92    2.11
   4 -13  -2    1.99    2.66
  -4  13   2    4.02    2.08
   3 -13  -2    4.55    2.61
   3 -13  -2    0.55    1.45
  -3  13   2    1.29    1.81
   2 -13  -2   -1.12    0.86
   2 -13  -2   -3.09    2.13
  -2  13   2   -0.07    1.53
   1 -13  -2    3.72    2.54
   1 -13  -2    3.44    1.16
  -1  13   2    3.34    1.74
   0 -13  -2   -0.16    0.66
   0 -13  -2    1.93    2.41
   0  13   2   -2.29    1.49
   0  13   2    0.36    0.83
  -1 -13  -2    1.19    0.73
  -1 -13  -2    3.77    2.79
   1  13   2   -1.41    1.52
   1  13   2    1.68    1.22
  -2 -13  -2   -0.58    0.51
  -2 -13  -2    0.00    2.80
   2  13   2   -0.16    1.44
   2  13   2    2.08    1.58
  -3 -13  -2    5.04    3.77
   3  13   2    1.52    1.28
   3  13   2    4.45    1.99
  -4 -13  -2    1.81    3.80
   4  13   2    2.20    1.98
  -5 -13  -2    0.06    4.51
   5  13   2    3.93    2.41
  -6 -13  -2   -3.78    5.01
   6  13   2    2.34    2.42
   7  13   2    2.24    2.35
   6 -14  -2    3.92    3.53
  -6  14   2    0.90    1.88
  -6  14   2   -2.70    2.43
   5 -14  -2    2.33    3.11
  -5  14   2   -1.90    2.42
  -5  14   2    6.18    1.67
   4 -14  -2    3.05    3.13
  -4  14   2   -0.47    2.22
   3 -14  -2    4.22    3.26
  -3  14   2   -1.39    2.28
   2 -14  -2    9.22    3.26
   2 -14  -2    5.71    1.81
  -2  14   2    5.51    2.50
   1 -14  -2    4.80    3.16
   1 -14  -2    1.58    1.16
  -1  14   2    1.88    2.20
   0 -14  -2   -0.29    0.77
   0 -14  -2    2.56    2.95
   0  14   2    0.87    0.93
   0  14   2   -3.98    1.99
  -1 -14  -2    4.35    3.24
  -1 -14  -2    1.76    0.83
   1  14   2    3.01    1.36
   1  14   2   -1.96    1.91
  -2 -14  -2    5.70    4.02
   2  14   2   -2.36    1.67
   2  14   2    0.98    1.69
  -3 -14  -2    2.49    4.18
   3  14   2    4.77    2.23
   3  14   2    0.43    1.50
  -4 -14  -2    0.67    4.52
   4  14   2    3.61    2.43
  -5 -14  -2    3.07    5.13
   5  14   2    4.89    2.72
  -6 -14  -2   -7.01    5.17
   6  14   2    3.51    2.77
   5 -15  -2    1.96    3.36
  -5  15   2   -4.99    2.74
   4 -15  -2    0.54    3.47
   3 -15  -2    2.84    3.57
  -3  15   2   -2.46    2.51
   2 -15  -2   -0.34    1.59
   2 -15  -2    3.15    3.73
  -2  15   2   -3.94    2.55
   1 -15  -2    4.77    3.69
   1 -15  -2   -0.17    1.29
  -1  15   2   -5.01    2.46
   0 -15  -2    6.95    4.01
   0 -15  -2   -0.96    0.95
   0  15   2   -0.63    2.50
  -1 -15  -2   -0.28    3.96
   1  15   2   -3.10    2.38
   1  15   2    0.83    1.51
  -2 -15  -2    4.86    4.55
   2  15   2    4.16    2.10
   2  15   2   -0.96    2.27
  -3 -15  -2    5.15    4.93
   3  15   2    6.26    2.54
   3  15   2    4.14    2.07
  -4 -15  -2    5.86    5.65
   4  15   2    2.99    2.57
  -5 -15  -2   -2.12    5.63
   5  15   2    6.17    2.81
   4 -16  -2    5.35    3.73
   3 -16  -2    5.66    3.86
   2 -16  -2    8.04    4.12
   2 -16  -2   -0.70    1.90
  -2  16   2   -4.98    2.99
   1 -16  -2    1.88    4.05
   1 -16  -2   -1.42    1.30
  -1  16   2   -2.92    2.93
   0 -16  -2    7.45    4.61
   0  16   2   -1.69    2.86
  -1 -16  -2    5.89    4.37
   1  16   2    3.30    1.95
   1  16   2   -4.08    2.79
  -2 -16  -2   11.07    5.07
   2  16   2   -1.88    2.50
   2  16   2    3.89    2.28
  -3 -16  -2    8.72    5.44
   3  16   2    7.13    2.76
  -4 -16  -2   -1.47    5.03
   4  16   2    4.57    2.76
   2 -17  -2    6.88    4.10
   2 -17  -2   -2.30    2.10
  -2  17   2   -6.30    3.26
   1 -17  -2    5.25    4.53
  -1  17   2   -4.90    3.19
   0 -17  -2    6.08    4.57
   0  17   2   -6.70    2.80
  -1 -17  -2    6.37    4.75
   1  17   2   -5.80    2.96
  -2 -17  -2   10.18    4.92
   2  17   2    4.58    2.45
   1  15  -3   10.28    3.28
  -1 -15   3   10.76    4.51
   0 -15   3    3.24    2.45
   0 -15   3   15.56    4.66
   1 -15   3    1.31    2.51
   2 -15   3   12.45    4.27
   2 -15   3    2.20    2.92
   3 -15   3    7.58    3.92
   3  14  -3    8.18    3.50
  -3 -14   3   12.74    5.18
  -3 -14   3    2.46    2.11
   2  14  -3    9.12    3.24
  -2 -14   3    5.88    2.37
  -2 -14   3    8.14    4.54
   1  14  -3    4.41    2.81
  -1 -14   3    7.68    4.40
  -1 -14   3    2.38    2.17
   0  14  -3    5.21    2.45
   0 -14   3    8.95    4.43
   0 -14   3   -0.57    2.09
   1 -14   3    6.90    3.89
   1 -14   3   -1.12    2.20
  -2  14  -3   -4.57    2.77
   2 -14   3    7.38    3.79
   2 -14   3    0.11    2.56
   3 -14   3    1.67    2.91
   3 -14   3    8.14    3.73
   4 -14   3    2.88    3.59
   4 -14   3   -5.86    2.77
   4  13  -3    2.91    3.11
  -4 -13   3    1.51    1.87
  -4 -13   3   -0.19    5.08
   3  13  -3   10.78    3.40
  -3 -13   3    5.46    2.09
  -3 -13   3    7.00    4.80
   2  13  -3    7.70    3.10
   2  13  -3   -2.69    1.97
  -2 -13   3    7.97    4.22
  -2 -13   3    3.41    2.03
   1  13  -3    2.78    2.61
   1  13  -3   -3.85    2.13
  -1 -13   3    5.85    4.04
  -1 -13   3    1.19    1.86
   0  13  -3    1.50    2.16
   0  13  -3   -4.06    2.27
   0 -13   3    4.32    3.68
   0 -13   3   -0.62    1.83
  -1  13  -3   -1.52    2.25
  -1  13  -3    2.96    1.88
   1 -13   3    4.79    3.46
   1 -13   3    2.37    2.19
  -2  13  -3   -3.92    2.42
   2 -13   3    2.05    2.32
   2 -13   3    6.21    3.32
  -3  13  -3    0.95    2.43
   3 -13   3    7.26    3.57
   3 -13   3    2.80    2.68
  -4  13  -3   -5.86    2.27
   4 -13   3    2.31    3.25
   4 -13   3    0.39    2.86
  -5  13  -3   -4.41    2.34
   5 -13   3    2.91    3.51
   5 -13   3   -1.77    2.82
  -6  13  -3   33.45    2.15
   5  12  -3    2.99    2.96
  -5 -12   3    3.13    1.91
   4  12  -3    5.55    3.10
  -4 -12   3    1.58    4.79
  -4 -12   3    2.35    1.64
   3  12  -3   -1.45    1.41
   3  12  -3    3.35    2.91
  -3 -12   3    3.60    1.83
  -3 -12   3   -0.12    3.91
   2  12  -3    3.22    2.64
  -2 -12   3    1.63    1.62
  -2 -12   3    4.06    3.66
   1  12  -3    6.52    2.44
   1  12  -3    3.03    1.98
  -1 -12   3    6.55    3.33
  -1 -12   3    5.83    1.94
   0  12  -3    0.95    1.93
   0  12  -3   -2.33    1.68
   0 -12   3    4.82    2.98
   0 -12   3    0.94    1.55
  -1  12  -3    4.64    2.32
  -1  12  -3    8.08    1.91
   1 -12   3    8.34    2.32
   1 -12   3    9.44    3.10
  -2  12  -3   -4.08    1.69
   2 -12   3    1.32    2.86
   2 -12   3   -0.32    1.78
  -3  12  -3   -2.75    1.86
   3 -12   3    1.78    2.75
   3 -12   3    0.85    2.12
  -4  12  -3   -2.29    2.29
   4 -12   3    4.43    3.14
   4 -12   3    0.01    2.36
  -5  12  -3   -3.97    2.01
   5 -12   3   -0.51    3.16
   5 -12   3   -1.91    2.70
  -6  12  -3   -5.45    2.23
   6 -12   3    0.32    3.16
   6  11  -3    4.61    3.00
  -6 -11   3    3.51    1.78
   5  11  -3    2.31    3.03
  -5 -11   3    2.10    1.76
  -5 -11   3   -2.74    4.58
   4  11  -3   13.06    3.18
  -4 -11   3    4.26    4.17
  -4 -11   3    7.84    2.02
   3  11  -3    6.50    2.65
  -3 -11   3    4.10    3.45
  -3 -11   3    4.84    1.64
   2  11  -3    1.16    1.34
   2  11  -3    2.54    2.31
  -2 -11   3    5.42    3.13
  -2 -11   3    3.29    1.42
   1  11  -3    1.36    2.02
   1  11  -3   -1.39    1.28
  -1 -11   3    3.95    2.71
  -1 -11   3    1.13    1.25
   0  11  -3    1.22    1.73
   0  11  -3    0.12    1.43
   0 -11   3    0.65    1.30
   0 -11   3    0.23    2.11
  -1  11  -3    3.21    1.65
  -1  11  -3    5.35    1.70
   1 -11   3    8.18    2.69
   1 -11   3    3.65    1.68
  -2  11  -3    3.46    1.65
  -2  11  -3    3.74    1.36
   2 -11   3    5.88    2.61
   2 -11   3    3.93    1.89
  -3  11  -3   -1.91    1.43
   3 -11   3    0.56    1.60
   3 -11   3    1.90    2.09
  -4  11  -3   -1.54    1.69
   4 -11   3    1.57    2.45
   4 -11   3   -2.08    1.93
  -5  11  -3   -4.18    1.90
   5 -11   3    4.12    3.00
   5 -11   3    0.13    2.35
  -6  11  -3   -4.70    1.87
   6 -11   3   -3.59    2.97
   7 -11   3   -0.06    3.37
   7  10  -3    6.69    2.91
  -7 -10   3    7.76    2.41
   6  10  -3    3.74    2.72
  -6 -10   3    5.03    1.94
  -6 -10   3   -8.04    4.45
   5  10  -3    2.43    2.68
  -5 -10   3    3.72    1.62
  -5 -10   3    0.24    3.84
   4  10  -3    1.13    2.46
  -4 -10   3    2.53    1.27
  -4 -10   3    0.86    3.21
   3  10  -3    0.82    2.04
   3  10  -3   -0.89    0.76
  -3 -10   3    1.09    2.87
  -3 -10   3    0.35    1.13
   2  10  -3    2.68    1.09
   2  10  -3    3.94    2.17
  -2 -10   3    3.28    1.38
  -2 -10   3    3.25    2.50
   1  10  -3    0.07    1.01
   1  10  -3    1.99    1.80
  -1 -10   3    0.66    1.04
  -1 -10   3    2.45    2.05
   0  10  -3    3.82    1.73
   0  10  -3    4.18    1.28
   0 -10   3    2.71    1.20
   0 -10   3    1.76    1.88
  -1  10  -3    0.51    0.98
  -1  10  -3    0.01    1.24
   1 -10   3    2.56    1.79
   1 -10   3    0.05    1.10
  -2  10  -3    2.06    1.21
  -2  10  -3    1.58    1.11
   2 -10   3    1.76    1.73
   2 -10   3    1.72    1.24
  -3  10  -3   -0.36    1.12
   3 -10   3    2.02    1.96
   3 -10   3    0.16    1.41
  -4  10  -3   -0.14    1.23
   4 -10   3   -0.44    1.90
   4 -10   3    0.28    1.52
  -5  10  -3   -0.62    1.50
   5 -10   3    1.21    2.00
   5 -10   3    1.63    2.30
  -6  10  -3   -0.65    1.54
   6 -10   3    1.31    2.86
  -7  10  -3   -3.83    1.61
   7 -10   3    1.41    3.44
  -8  10  -3    7.37    2.04
   8 -10   3   -0.73    3.20
   7   9  -3    1.01    2.56
  -7  -9   3    3.74    2.16
   6   9  -3    1.99    2.71
  -6  -9   3   -7.34    3.66
  -6  -9   3    2.53    1.74
   5   9  -3    5.27    2.61
  -5  -9   3    4.68    1.68
  -5  -9   3    0.29    3.31
   4   9  -3    2.62    2.10
  -4  -9   3    2.04    1.22
  -4  -9   3    1.67    2.68
   3   9  -3    2.51    1.99
   3   9  -3    1.88    0.78
  -3  -9   3    2.95    2.25
  -3  -9   3    3.89    1.32
   2   9  -3    0.33    0.70
   2   9  -3    1.39    1.63
  -2  -9   3    0.08    0.91
  -2  -9   3    1.51    1.96
   1   9  -3    2.09    0.87
   1   9  -3    2.54    1.57
  -1  -9   3    2.68    1.85
  -1  -9   3    2.14    1.03
   0   9  -3    1.17    1.34
   0   9  -3    0.58    0.79
   0  -9   3    0.06    1.49
   0  -9   3    1.16    0.90
  -1   9  -3    3.14    1.32
  -1   9  -3    1.70    0.91
   1  -9   3    2.71    1.05
   1  -9   3    2.50    1.50
  -2   9  -3    6.29    1.32
  -2   9  -3    9.15    1.35
   2  -9   3    9.42    1.96
   2  -9   3    8.59    1.57
  -3   9  -3   -0.87    0.72
  -3   9  -3    0.17    0.96
   3  -9   3    0.00    1.48
   3  -9   3   -0.20    1.06
  -4   9  -3    1.38    1.08
   4  -9   3    1.64    1.39
   4  -9   3    2.13    1.73
  -5   9  -3    0.30    1.23
   5  -9   3    2.15    2.33
   5  -9   3    0.18    1.55
  -6   9  -3   -2.46    1.23
   6  -9   3   -0.12    2.32
  -7   9  -3    7.16    1.70
   7  -9   3    5.26    3.27
  -8   9  -3    6.55    1.94
   8  -9   3    4.94    3.60
   8   8  -3    5.91    2.62
  -8  -8   3    7.41    2.65
   7   8  -3    3.43    2.46
  -7  -8   3   -7.41    3.70
  -7  -8   3    3.07    2.08
   6   8  -3   -0.71    1.50
   6   8  -3    2.89    2.39
  -6  -8   3   -4.50    2.95
  -6  -8   3    3.03    1.64
   5   8  -3    1.71    2.01
   5   8  -3   -0.18    1.19
  -5  -8   3   -0.58    2.56
  -5  -8   3    1.86    1.31
   4   8  -3    1.43    1.01
   4   8  -3    1.51    1.71
  -4  -8   3    2.09    1.14
  -4  -8   3    2.52    2.15
   3   8  -3    2.68    0.68
   3   8  -3    1.93    1.53
  -3  -8   3    2.14    1.02
  -3  -8   3    3.15    1.90
   2   8  -3    0.07    1.34
   2   8  -3    0.60    0.58
  -2  -8   3    0.32    0.80
  -2  -8   3   -0.09    1.55
   1   8  -3    3.89    1.51
   1   8  -3    3.70    0.80
  -1  -8   3    3.97    1.70
  -1  -8   3    3.97    1.05
   0   8  -3    4.78    1.42
   0   8  -3    4.35    0.84
   0  -8   3    4.18    1.04
   0  -8   3    5.42    1.54
  -1   8  -3    0.40    1.07
  -1   8  -3   -0.22    0.55
   1  -8   3    0.30    0.73
   1  -8   3    0.01    1.17
  -2   8  -3    2.69    1.09
  -2   8  -3    2.72    0.82
   2  -8   3    2.44    0.98
   2  -8   3    1.82    1.24
  -3   8  -3    2.95    0.86
  -3   8  -3    4.42    1.04
   3  -8   3    4.69    1.24
   3  -8   3    3.79    1.43
  -4   8  -3    0.36    0.77
   4  -8   3    0.91    1.10
   4  -8   3   -0.18    1.34
  -5   8  -3    8.30    1.37
   5  -8   3    9.03    1.85
   5  -8   3   10.89    2.51
  -6   8  -3    3.19    1.19
   6  -8   3    5.88    2.62
  -7   8  -3    3.94    1.64
  -7   8  -3   -0.48    1.08
   7  -8   3    2.19    2.75
  -8   8  -3    0.71    1.78
   8  -8   3    0.87    3.21
  -9   8  -3   -2.13    2.06
   9  -8   3   -0.62    3.28
   8   7  -3   -0.42    2.89
   8   7  -3    3.51    2.45
  -8  -7   3    3.61    2.40
   7   7  -3    0.64    2.26
   7   7  -3    3.02    2.24
  -7  -7   3    3.64    2.11
  -7  -7   3   -5.36    3.25
   6   7  -3   -0.89    1.49
   6   7  -3    1.90    1.92
  -6  -7   3   -3.70    2.33
  -6  -7   3    2.04    1.51
   5   7  -3    0.93    1.18
   5   7  -3    0.51    1.65
  -5  -7   3    0.01    1.10
  -5  -7   3   -2.08    1.73
   4   7  -3    2.28    1.54
   4   7  -3    0.50    0.51
   4   7  -3    1.59    1.02
  -4  -7   3    1.74    1.70
  -4  -7   3    1.50    1.03
   3   7  -3    7.20    1.66
   3   7  -3    5.96    0.79
   3   7  -3    6.39    1.08
  -3  -7   3    7.28    1.29
  -3  -7   3    7.54    1.89
   2   7  -3    0.24    1.14
   2   7  -3    0.13    0.52
   2   7  -3    0.93    0.48
  -2  -7   3   -0.36    0.72
  -2  -7   3    0.33    1.35
   1   7  -3    4.00    1.29
   1   7  -3    3.82    0.68
  -1  -7   3    3.44    1.46
  -1  -7   3    4.56    1.04
   0   7  -3    0.42    1.01
   0   7  -3   -0.25    0.44
   0  -7   3    0.14    1.12
   0  -7   3   -0.01    0.67
  -1   7  -3    4.27    1.10
  -1   7  -3    3.86    0.70
   1  -7   3    4.44    1.35
   1  -7   3    5.00    1.03
  -2   7  -3   12.06    1.27
  -2   7  -3   10.14    1.29
   2  -7   3   11.35    1.71
   2  -7   3   11.67    1.60
  -3   7  -3    2.94    0.73
  -3   7  -3    2.85    0.89
   3  -7   3    2.47    0.95
   3  -7   3    2.14    1.22
  -4   7  -3   24.27    1.72
  -4   7  -3   25.93    1.99
   4  -7   3   22.96    1.59
   4  -7   3   24.26    2.16
   4  -7   3   26.22    2.92
  -5   7  -3    0.32    0.69
   5  -7   3    1.53    1.53
   5  -7   3    1.19    0.72
   5  -7   3    0.53    1.04
  -6   7  -3    1.43    0.74
  -6   7  -3   -0.51    0.73
   6  -7   3    0.84    1.91
   6  -7   3    0.56    0.79
  -7   7  -3   -0.71    0.81
  -7   7  -3    0.89    1.16
   7  -7   3    2.23    2.56
   7  -7   3    0.64    1.11
  -8   7  -3   -0.13    1.75
   8  -7   3    2.59    3.04
  -9   7  -3   -2.63    2.03
   9  -7   3   -0.83    3.56
   9   6  -3   -0.52    3.19
   9   6  -3    4.76    2.31
  -9  -6   3    3.57    2.76
   8   6  -3   -0.08    2.62
   8   6  -3    1.95    2.03
  -8  -6   3   -5.78    3.55
  -8  -6   3    3.64    2.44
   7   6  -3    1.34    1.98
   7   6  -3    0.55    2.21
  -7  -6   3   -4.96    2.52
  -7  -6   3    1.63    1.86
   6   6  -3    1.03    1.74
   6   6  -3    1.43    1.62
  -6  -6   3    2.13    1.46
  -6  -6   3   -2.16    1.85
   5   6  -3   -0.38    1.13
   5   6  -3    0.22    1.52
  -5  -6   3   -0.69    1.50
  -5  -6   3    1.11    1.12
   4   6  -3   -0.24    0.43
   4   6  -3    0.43    1.27
   4   6  -3    0.00    0.97
  -4  -6   3    0.38    0.85
  -4  -6   3    1.71    1.44
   3   6  -3    0.67    1.12
   3   6  -3    0.62    0.78
   3   6  -3    0.94    0.46
  -3  -6   3    1.09    0.87
  -3  -6   3    1.31    1.30
   2   6  -3    4.27    1.25
   2   6  -3    4.67    0.65
   2   6  -3    3.72    0.73
  -2  -6   3    3.67    1.44
  -2  -6   3    3.96    0.97
   1   6  -3   -1.01    0.88
   1   6  -3    0.02    0.37
  -1  -6   3   -0.01    0.64
  -1  -6   3    1.13    1.20
   0   6  -3   20.83    1.96
   0   6  -3   19.61    1.27
   0  -6   3   21.51    1.66
   0  -6   3   18.54    2.16
  -1   6  -3   21.88    1.89
  -1   6  -3   20.45    1.32
   1  -6   3   20.51    2.20
   1  -6   3   20.89    1.63
  -2   6  -3    0.82    0.76
  -2   6  -3    0.88    0.46
   2  -6   3    1.26    1.01
   2  -6   3    0.51    0.66
  -3   6  -3    1.31    0.49
  -3   6  -3    1.60    0.72
   3  -6   3    1.11    0.44
   3  -6   3    1.05    0.76
   3  -6   3    1.79    0.97
  -4   6  -3    1.83    0.62
  -4   6  -3    1.15    0.62
   4  -6   3    2.07    1.14
   4  -6   3    1.77    0.72
   4  -6   3    1.34    0.77
  -5   6  -3    2.86    0.74
   5  -6   3    1.89    1.27
   5  -6   3    3.05    1.09
   5  -6   3    2.39    0.89
  -6   6  -3    1.18    0.70
  -6   6  -3   -0.01    0.58
   6  -6   3    0.25    1.54
   6  -6   3    0.81    0.87
  -7   6  -3   -0.04    0.63
  -7   6  -3    2.59    1.27
   7  -6   3    0.30    1.00
   7  -6   3    0.63    2.21
  -8   6  -3    1.63    1.91
   8  -6   3    2.90    2.77
   8  -6   3    1.59    1.75
  -9   6  -3   -3.78    2.04
   9  -6   3    0.69    2.41
   9  -6   3   -1.23    3.35
   9   5  -3    0.64    3.03
   9   5  -3    4.18    2.06
  -9  -5   3    1.50    2.72
   8   5  -3    5.27    2.16
   8   5  -3    2.10    2.66
  -8  -5   3    0.40    2.25
  -8  -5   3   -3.53    3.41
   7   5  -3    3.46    1.73
   7   5  -3    3.29    2.28
  -7  -5   3    4.00    1.83
  -7  -5   3   -0.18    2.55
   6   5  -3    1.37    1.64
   6   5  -3    0.92    1.49
  -6  -5   3    1.01    1.23
  -6  -5   3   -0.61    1.51
   5   5  -3    4.78    1.52
   5   5  -3    3.79    1.43
  -5  -5   3    4.59    1.53
  -5  -5   3    3.89    1.21
   4   5  -3   50.24    3.01
   4   5  -3   53.46    3.18
   4   5  -3   51.00    1.61
  -4  -5   3   51.49    3.24
  -4  -5   3   53.12    2.75
   3   5  -3   14.45    0.96
   3   5  -3   15.82    1.76
   3   5  -3   12.79    1.69
  -3  -5   3   12.89    1.72
  -3  -5   3   16.88    2.27
   2   5  -3    9.75    0.87
   2   5  -3    8.48    1.34
   2   5  -3    9.74    1.25
  -2  -5   3   10.16    1.43
  -2  -5   3    8.65    1.48
   1   5  -3    1.17    0.39
   1   5  -3    1.23    0.81
   1   5  -3    1.04    0.38
  -1  -5   3    1.41    0.97
  -1  -5   3    1.19    0.65
   0   5  -3    0.62    0.31
   0   5  -3    1.27    0.72
   0  -5   3    0.81    0.91
   0  -5   3    0.87    0.56
  -1   5  -3   -0.27    0.56
  -1   5  -3    0.18    0.31
   1  -5   3    0.13    0.50
   1  -5   3   -0.17    0.69
  -2   5  -3    5.63    0.77
  -2   5  -3    6.41    0.83
   2  -5   3    6.52    1.14
   2  -5   3    6.04    0.95
  -3   5  -3   36.18    1.63
  -3   5  -3   36.48    1.53
   3  -5   3   33.52    1.55
   3  -5   3   36.90    2.45
   3  -5   3   35.50    2.01
  -4   5  -3   -0.18    0.36
  -4   5  -3   -0.17    0.38
   4  -5   3   -0.30    0.55
   4  -5   3   -0.10    0.81
   4  -5   3   -0.07    0.60
  -5   5  -3    5.05    0.78
  -5   5  -3    5.07    0.66
   5  -5   3    6.90    1.53
   5  -5   3    5.01    1.11
   5  -5   3    6.23    1.18
  -6   5  -3    0.88    0.51
  -6   5  -3    1.66    0.74
   6  -5   3    2.67    1.56
   6  -5   3    0.83    0.96
  -7   5  -3   -0.49    0.82
  -7   5  -3   -0.82    0.44
   7  -5   3   -0.47    0.97
   7  -5   3   -1.28    1.63
  -8   5  -3   -2.31    1.35
   8  -5   3   -0.67    1.62
   8  -5   3   -0.84    2.51
  -9   5  -3   -0.70    2.11
   9  -5   3   -0.19    3.18
   9  -5   3    1.04    2.36
  10  -5   3    0.11    2.76
  10  -5   3   -3.21    3.67
   9   4  -3    2.18    1.70
   9   4  -3   -1.32    2.96
  -9  -4   3   -0.69    3.16
   8   4  -3    3.20    1.80
   8   4  -3    2.89    2.78
  -8  -4   3   -2.63    2.65
  -8  -4   3    1.62    2.74
   7   4  -3    3.84    1.64
   7   4  -3    3.65    2.08
  -7  -4   3    0.77    2.04
  -7  -4   3    1.89    2.05
   6   4  -3   22.63    3.14
   6   4  -3   31.46    3.06
  -6  -4   3   22.23    3.05
  -6  -4   3   26.81    2.98
   5   4  -3    0.30    1.08
   5   4  -3   -0.41    1.09
  -5  -4   3    0.00    0.87
  -5  -4   3    1.28    1.01
   4   4  -3    7.78    1.38
   4   4  -3    7.63    1.45
   4   4  -3   10.54    0.73
  -4  -4   3   12.30    1.97
  -4  -4   3    9.22    1.35
   3   4  -3   -0.27    0.85
   3   4  -3    0.55    0.75
   3   4  -3   -0.09    0.23
  -3  -4   3    0.97    0.84
  -3  -4   3    0.07    0.70
   2   4  -3   10.14    0.75
   2   4  -3   11.75    1.28
   2   4  -3   11.71    1.69
  -2  -4   3   10.73    1.66
  -2  -4   3   10.78    1.35
   1   4  -3    2.90    0.75
   1   4  -3    3.02    0.51
   1   4  -3    2.46    0.42
  -1  -4   3    2.50    0.65
  -1  -4   3    3.73    0.96
   0   4  -3  335.23    5.40
   0   4  -3  322.05    5.88
   0  -4   3  312.06    6.59
   0  -4   3  322.95    6.04
  -1   4  -3   10.00    1.02
  -1   4  -3    8.85    0.83
   1  -4   3    9.12    1.03
   1  -4   3    8.39    1.34
  -2   4  -3   -0.09    0.32
  -2   4  -3   -0.12    0.25
   2  -4   3   -0.21    0.41
   2  -4   3   -0.58    0.57
   2  -4   3   -0.09    0.27
  -3   4  -3    1.87    0.43
  -3   4  -3    1.78    0.44
   3  -4   3    2.04    0.51
   3  -4   3    2.16    0.77
   3  -4   3    2.30    0.69
  -4   4  -3    4.12    0.60
  -4   4  -3    5.80    0.72
   4  -4   3    4.53    0.89
   4  -4   3    4.77    0.90
   4  -4   3    3.85    1.05
  -5   4  -3    0.48    0.39
  -5   4  -3    0.58    0.36
   5  -4   3    0.60    0.73
   5  -4   3    0.88    0.73
   5  -4   3   -0.26    0.84
  -6   4  -3    6.39    1.11
  -6   4  -3    4.79    0.70
   6  -4   3    6.29    1.60
   6  -4   3    5.04    1.26
  -7   4  -3    2.13    0.59
  -7   4  -3    3.94    1.19
   7  -4   3    5.79    2.16
   7  -4   3    3.43    1.47
  -8   4  -3   -0.86    1.29
   8  -4   3    0.39    1.72
   8  -4   3   -1.43    2.11
  -9   4  -3   -3.76    1.82
   9  -4   3    1.71    2.56
   9  -4   3    2.79    3.21
  10  -4   3   -2.66    3.48
  10  -4   3   -4.64    2.74
   9   3  -3    0.97    3.09
  -9  -3   3    3.77    3.41
  -9  -3   3   -2.74    3.41
   8   3  -3    9.81    1.86
   8   3  -3    7.82    2.95
  -8  -3   3    8.49    3.13
  -8  -3   3   15.02    3.26
   7   3  -3    1.60    1.18
   7   3  -3    0.52    1.87
  -7  -3   3   -0.80    1.57
  -7  -3   3   -0.71    1.70
   6   3  -3    0.13    1.41
   6   3  -3    0.16    1.02
  -6  -3   3    1.19    1.25
  -6  -3   3   -0.18    0.95
   5   3  -3    4.59    1.43
   5   3  -3    5.39    1.30
  -5  -3   3    5.67    1.23
  -5  -3   3    5.01    1.21
   4   3  -3    5.76    1.20
   4   3  -3    5.62    0.50
   4   3  -3    4.98    1.23
  -4  -3   3    5.08    1.07
  -4  -3   3    5.21    1.01
   3   3  -3    4.16    0.98
   3   3  -3    4.54    1.03
  -3  -3   3    4.99    0.93
  -3  -3   3    4.64    0.94
   2   3  -3   33.22    1.87
   2   3  -3   34.39    1.80
  -2  -3   3   34.23    1.88
  -2  -3   3   32.18    1.08
  -2  -3   3   33.22    1.72
   1   3  -3    8.74    1.17
   1   3  -3    8.11    0.88
  -1  -3   3    8.08    0.64
  -1  -3   3    8.02    1.01
  -1  -3   3    9.30    1.34
   0   3  -3    0.28    0.45
   0  -3   3    0.42    0.59
   0  -3   3    0.32    0.42
   0  -3   3    0.16    0.24
  -1   3  -3   75.45    2.03
   1  -3   3   79.03    1.95
   1  -3   3   77.20    2.25
   1  -3   3   82.58    2.57
  -2   3  -3    0.57    0.30
  -2   3  -3    0.34    0.27
   2  -3   3    0.22    0.52
   2  -3   3    0.42    0.42
   2  -3   3    0.57    0.33
  -3   3  -3    0.17    0.24
  -3   3  -3   -0.19    0.20
   3  -3   3    0.05    0.48
   3  -3   3   -0.12    0.37
   3  -3   3    0.28    0.57
  -4   3  -3    3.72    0.54
   4  -3   3    4.55    0.90
   4  -3   3    4.52    0.59
   4  -3   3    3.23    0.77
   4  -3   3    3.51    0.95
  -5   3  -3    0.36    0.32
  -5   3  -3   -0.11    0.39
   5  -3   3   -0.23    0.67
   5  -3   3    1.25    0.90
   5  -3   3    0.15    0.32
  -6   3  -3    0.86    0.50
  -6   3  -3    0.45    0.37
   6  -3   3    0.95    0.38
   6  -3   3    1.98    1.23
   6  -3   3    1.24    0.97
  -7   3  -3    0.37    0.44
  -7   3  -3    1.37    0.91
   7  -3   3    1.07    1.35
   7  -3   3    1.59    1.60
  -8   3  -3    4.17    1.65
   8  -3   3    3.57    1.93
   8  -3   3    1.51    2.38
  -9   3  -3   -1.30    1.91
   9  -3   3    1.28    3.13
   9  -3   3    2.37    2.59
  10  -3   3   -6.46    3.47
  10  -3   3   -1.22    2.92
 -10  -2   3   -5.78    3.74
   9   2  -3    3.84    3.19
  -9  -2   3   -1.09    2.96
  -9  -2   3    2.64    3.11
   8   2  -3    1.47    1.07
   8   2  -3   -0.18    2.20
  -8  -2   3    0.86    2.46
  -8  -2   3   -2.27    2.10
   7   2  -3    1.95    1.07
   7   2  -3    0.79    1.78
  -7  -2   3   -0.19    1.25
  -7  -2   3   -0.48    1.68
   6   2  -3    2.95    1.10
   6   2  -3    1.46    1.30
  -6  -2   3    2.93    1.24
  -6  -2   3    2.65    1.14
   5   2  -3    8.53    1.64
   5   2  -3    8.74    1.35
  -5  -2   3    9.71    1.49
  -5  -2   3    8.47    1.34
   4   2  -3    0.44    0.85
   4   2  -3    0.41    0.81
  -4  -2   3    0.40    0.19
  -4  -2   3    0.60    0.73
  -4  -2   3    0.60    0.58
   3   2  -3    0.55    0.70
   3   2  -3    0.20    0.66
  -3  -2   3    0.30    0.18
  -3  -2   3    0.58    0.49
  -3  -2   3    0.22    0.58
   2   2  -3    6.00    0.84
   2   2  -3    7.01    1.15
  -2  -2   3    5.32    0.78
  -2  -2   3    7.00    0.51
  -2  -2   3    7.46    0.99
   1   2  -3   18.53    1.25
   1   2  -3   15.55    1.14
  -1  -2   3   16.59    0.74
  -1  -2   3   16.51    1.19
  -1  -2   3   16.64    1.21
   0   2  -3   92.94    2.28
   0   2  -3   97.31    2.16
   0  -2   3   93.40    2.40
   0  -2   3   96.15    2.50
   0  -2   3   92.22    1.96
   0  -2   3   91.97    2.03
  -1   2  -3    4.43    0.49
  -1   2  -3    5.09    0.66
  -1   2  -3    5.19    0.56
   1  -2   3    3.65    0.56
   1  -2   3    4.30    0.69
   1  -2   3    5.11    0.58
  -2   2  -3    0.48    0.25
   2  -2   3    0.31    0.25
   2  -2   3    0.57    0.38
   2  -2   3    0.35    0.45
   2  -2   3    0.22    0.29
  -3   2  -3   -0.13    0.21
   3  -2   3    0.38    0.25
   3  -2   3    0.14    0.44
   3  -2   3    0.28    0.38
   3  -2   3   -0.08    0.47
  -4   2  -3   -0.09    0.22
   4  -2   3    0.00    0.26
   4  -2   3    0.45    0.64
   4  -2   3   -0.33    0.46
   4  -2   3   -0.17    0.48
  -5   2  -3    0.98    0.46
  -5   2  -3    0.59    0.31
   5  -2   3    1.16    0.75
   5  -2   3    1.01    0.41
   5  -2   3    1.14    0.85
  -6   2  -3   16.22    1.37
  -6   2  -3   14.07    0.97
   6  -2   3   14.25    1.00
   6  -2   3   14.40    2.25
   6  -2   3   16.42    2.52
  -7   2  -3    6.08    1.20
   7  -2   3    5.99    1.72
   7  -2   3    4.54    1.77
  -8   2  -3   -0.73    1.18
   8  -2   3    0.80    1.90
   8  -2   3    0.93    2.06
  -9   2  -3   -1.97    1.82
   9  -2   3   -0.74    2.44
   9  -2   3   -1.80    2.97
  10  -2   3    2.22    2.97
  10   1  -3    5.38    3.46
 -10  -1   3   -1.49    3.23
   9   1  -3    3.32    2.87
  -9  -1   3   -1.35    2.51
  -9  -1   3    0.37    3.21
   8   1  -3    2.64    2.24
  -8  -1   3    2.04    2.43
  -8  -1   3    2.25    2.00
   7   1  -3    1.23    0.94
   7   1  -3    1.88    1.72
  -7  -1   3    1.24    1.64
  -7  -1   3    0.22    1.08
   6   1  -3    0.82    1.16
   6   1  -3    0.76    0.79
  -6  -1   3    0.64    0.71
  -6  -1   3    1.03    1.10
   5   1  -3    0.45    0.79
   5   1  -3   -0.15    0.90
  -5  -1   3    0.21    0.77
  -5  -1   3   -0.30    0.45
   4   1  -3    2.52    1.00
   4   1  -3    3.85    0.88
  -4  -1   3    3.80    0.89
  -4  -1   3    2.98    0.68
  -4  -1   3    3.27    0.36
   3   1  -3    0.16    0.58
   3   1  -3    0.59    0.67
  -3  -1   3    0.62    0.54
  -3  -1   3    0.58    0.40
  -3  -1   3    0.88    0.20
   2   1  -3   21.42    1.34
   2   1  -3   21.67    1.54
  -2  -1   3   21.69    1.12
  -2  -1   3   21.02    0.75
  -2  -1   3   22.34    1.32
   1   1  -3    8.51    0.92
   1   1  -3    6.00    0.83
  -1  -1   3    7.31    0.95
  -1  -1   3    8.86    0.84
  -1  -1   3    7.80    0.54
   0   1  -3    2.24    0.52
   0   1  -3    1.96    0.40
   0   1  -3    0.89    0.37
   0  -1   3    1.77    0.46
   0  -1   3    1.54    0.46
   0  -1   3    2.26    0.33
  -1   1  -3    2.34    0.38
  -1   1  -3    2.47    0.39
   1  -1   3    2.72    0.47
   1  -1   3    2.37    0.44
   1  -1   3    2.65    0.35
   2  -1   3    0.13    0.22
   2  -1   3    0.41    0.36
   2  -1   3    0.26    0.42
   2  -1   3    0.24    0.24
   2  -1   3    0.17    0.34
   3  -1   3    4.43    0.55
   3  -1   3    3.88    0.58
   3  -1   3    4.54    0.56
   3  -1   3    4.05    0.68
   3  -1   3    3.63    0.72
  -4   1  -3   44.91    1.31
  -4   1  -3   45.61    1.66
   4  -1   3   44.95    1.45
   4  -1   3   44.34    2.20
   4  -1   3   45.29    2.23
  -5   1  -3    0.74    0.27
  -5   1  -3    0.53    0.37
   5  -1   3    0.94    0.86
   5  -1   3    0.47    0.80
   5  -1   3    0.46    0.39
  -6   1  -3   11.48    0.85
  -6   1  -3   14.10    1.33
   6  -1   3   13.04    1.10
   6  -1   3    9.14    1.55
   6  -1   3   12.17    1.82
  -7   1  -3   -0.13    0.61
   7  -1   3   -0.45    1.06
   7  -1   3   -0.89    1.18
   7  -1   3   -0.08    0.45
  -8   1  -3    0.81    1.13
   8  -1   3    1.68    1.96
   8  -1   3    1.16    2.08
   9  -1   3   -1.50    2.17
 -10   1  -3    6.94    3.13
  10  -1   3    9.71    3.40
  10   0  -3    3.66    3.23
 -10   0   3   -0.01    2.73
   9   0  -3    1.14    2.87
  -9   0   3   -3.07    3.06
  -9   0   3    0.94    2.31
   8   0  -3    1.87    2.21
  -8   0   3   -0.83    2.20
  -8   0   3   -0.30    1.31
   7   0  -3    0.43    0.70
   7   0  -3   -0.36    1.48
  -7   0   3   -0.34    1.40
  -7   0   3   -0.48    0.81
   6   0  -3   20.68    1.80
   6   0  -3   19.82    2.93
  -6   0   3   21.65    2.46
  -6   0   3   20.75    1.94
   5   0  -3    2.85    1.17
   5   0  -3    3.32    0.87
  -5   0   3    3.48    0.81
  -5   0   3    4.02    0.98
   4   0  -3    2.12    0.96
   4   0  -3    1.93    0.70
  -4   0   3    2.86    0.37
  -4   0   3    2.50    0.76
  -4   0   3    2.19    0.59
   3   0  -3    0.12    0.65
   3   0  -3    0.11    0.45
  -3   0   3   -0.03    0.46
  -3   0   3    0.13    0.17
  -3   0   3    0.07    0.27
   2   0  -3    2.03    0.69
   2   0  -3    2.24    0.52
  -2   0   3    3.02    0.38
  -2   0   3    3.09    0.57
  -2   0   3    2.76    0.44
   1   0  -3    2.66    0.46
   1   0  -3    1.76    0.66
  -1   0   3    2.45    0.53
  -1   0   3    3.18    0.41
  -1   0   3    2.51    0.32
   0   0  -3   25.42    1.19
   0   0  -3   24.75    0.91
   0   0   3   23.80    0.81
   0   0   3   24.72    1.03
  -1   0  -3  137.89    2.82
   1   0   3  141.91    2.60
   1   0   3  139.71    2.39
   1   0   3  135.61    2.39
   1   0   3  129.73    2.48
   2   0   3   21.89    1.19
   2   0   3   20.20    0.85
   2   0   3   21.19    0.82
   2   0   3   21.37    1.15
   2   0   3   20.96    0.94
   3   0   3   19.99    1.32
   3   0   3   21.14    0.82
   3   0   3   21.27    1.35
   3   0   3   18.51    0.89
   3   0   3   20.80    1.07
  -4   0  -3   35.92    1.37
   4   0   3   35.23    2.05
   4   0   3   36.58    1.13
   4   0   3   35.02    2.03
   4   0   3   36.55    1.39
  -5   0  -3    0.53    0.38
  -5   0  -3    0.53    0.22
   5   0   3    0.71    0.78
   5   0   3    0.36    0.42
   5   0   3    1.45    0.88
  -6   0  -3    3.20    0.42
  -6   0  -3    3.67    0.73
   6   0   3    5.18    1.37
   6   0   3    4.38    0.73
   6   0   3    3.05    1.18
  -7   0  -3    7.85    1.18
   7   0   3    6.29    1.75
   7   0   3    8.19    1.89
   7   0   3    7.78    1.12
  -8   0  -3   16.13    2.02
  -8   0  -3   21.45    2.25
   8   0   3   15.26    1.70
   8   0   3   13.95    2.69
  -9   0  -3   -3.53    1.57
  -9   0  -3    4.66    1.72
   9   0   3   -0.17    2.52
 -10   0  -3    7.25    1.83
  10   0   3   -0.10    2.69
  10  -1  -3    1.57    3.31
 -10   1   3    6.27    2.46
   9  -1  -3    4.28    3.16
  -9   1   3   -5.73    3.11
  -9   1   3    2.12    1.84
   8  -1  -3   -0.60    2.25
  -8   1   3   -0.88    2.14
  -8   1   3    3.02    1.43
   7  -1  -3    0.08    0.55
   7  -1  -3    0.34    1.51
  -7   1   3   -0.38    1.30
  -7   1   3    1.00    0.89
   6  -1  -3    2.97    0.76
   6  -1  -3    1.70    1.23
  -6   1   3    3.27    0.87
  -6   1   3    2.93    1.09
   5  -1  -3    3.83    1.12
   5  -1  -3    4.01    0.84
   5  -1  -3    2.80    1.17
  -5   1   3    3.84    0.92
  -5   1   3    3.62    0.49
   4  -1  -3   22.30    2.09
   4  -1  -3   21.07    1.38
   4  -1  -3   20.84    1.74
  -4   1   3   22.23    1.56
  -4   1   3   20.58    0.81
   3  -1  -3   49.44    2.51
   3  -1  -3   49.04    2.05
   3  -1  -3   49.89    1.69
  -3   1   3   48.45    1.21
  -3   1   3   48.96    1.84
   2  -1  -3    7.13    0.81
   2  -1  -3    5.89    0.98
   2  -1  -3    8.00    0.80
  -2   1   3    8.12    0.89
  -2   1   3    6.46    0.52
   1  -1  -3    0.12    0.28
   1  -1  -3   -0.29    0.58
   1  -1  -3    0.35    0.24
  -1   1   3    0.44    0.35
  -1   1   3    0.06    0.21
   0  -1  -3    0.26    0.36
   0   1   3    0.03    0.24
   0   1   3    0.20    0.18
   0   1   3   -0.15    0.17
  -1  -1  -3    1.33    0.35
  -1  -1  -3    1.82    0.26
  -1  -1  -3    1.15    0.33
   1   1   3    1.51    0.26
   1   1   3    1.58    0.29
   1   1   3    1.51    0.26
   2   1   3   55.50    1.73
   2   1   3   51.41    1.45
   2   1   3   54.65    1.25
   2   1   3   54.19    1.35
   2   1   3   55.99    1.89
  -3  -1  -3   24.25    0.91
   3   1   3   24.31    0.80
   3   1   3   23.68    1.07
   3   1   3   24.30    1.49
   3   1   3   23.73    1.44
  -4  -1  -3    0.41    0.27
   4   1   3   -0.20    0.51
   4   1   3    1.17    0.66
   4   1   3    0.47    0.21
   4   1   3    0.14    0.34
  -5  -1  -3    6.41    0.44
  -5  -1  -3    7.00    0.87
   5   1   3    5.10    0.75
   5   1   3    5.62    1.18
  -6  -1  -3    2.07    0.30
  -6  -1  -3    2.59    0.81
  -6  -1  -3    2.65    0.68
   6   1   3    2.85    0.69
   6   1   3    3.15    1.18
  -7  -1  -3   -0.07    0.60
  -7  -1  -3   -0.23    0.54
   7   1   3    0.55    0.56
   7   1   3    1.06    1.24
  -8  -1  -3   -0.39    0.97
  -8  -1  -3    0.25    1.09
   8   1   3   -0.51    1.56
   8   1   3    0.63    0.60
  -9  -1  -3    4.92    1.88
  -9  -1  -3    1.30    1.88
   9   1   3    6.45    2.65
 -10  -1  -3    2.29    2.11
  10   1   3    4.37    3.25
   9  -2  -3    0.77    2.89
  -9   2   3   -4.19    3.02
   8  -2  -3    0.15    1.96
  -8   2   3   -2.14    2.11
   7  -2  -3    3.99    1.82
   7  -2  -3    5.47    2.07
  -7   2   3    4.54    1.61
   6  -2  -3    0.74    1.15
   6  -2  -3    0.87    1.11
   6  -2  -3    0.82    0.54
  -6   2   3    0.99    0.84
   5  -2  -3    4.27    1.29
   5  -2  -3    3.74    0.72
   5  -2  -3    5.32    1.23
  -5   2   3    4.70    0.94
  -5   2   3    4.50    0.63
   4  -2  -3   13.43    1.04
   4  -2  -3   12.78    1.94
   4  -2  -3   12.03    1.50
  -4   2   3   12.43    0.77
  -4   2   3   13.24    1.29
   3  -2  -3   17.46    1.00
   3  -2  -3   15.91    1.69
   3  -2  -3   17.58    1.34
  -3   2   3   16.73    1.14
  -3   2   3   15.89    0.81
   2  -2  -3   42.28    1.66
   2  -2  -3   40.53    1.21
   2  -2  -3   40.75    2.11
  -2   2   3   41.22    1.18
  -2   2   3   40.93    1.43
   1  -2  -3    2.58    0.72
   1  -2  -3    2.77    0.39
   1  -2  -3    2.67    0.47
  -1   2   3    3.86    0.58
  -1   2   3    2.29    0.35
   0  -2  -3  125.02    3.01
   0  -2  -3  127.23    2.42
   0   2   3  117.21    2.37
   0   2   3  126.22    2.15
   0   2   3  125.67    2.13
   0   2   3  130.73    2.23
  -1  -2  -3  232.46    5.55
  -1  -2  -3  229.81    4.69
   1   2   3  240.24    3.82
   1   2   3  240.87    3.59
  -2  -2  -3  183.81    3.68
  -2  -2  -3  180.35    2.76
   2   2   3  183.49    3.37
   2   2   3  179.10    4.01
   2   2   3  178.90    2.88
  -3  -2  -3    7.96    0.81
  -3  -2  -3    7.76    0.54
   3   2   3    8.56    1.08
   3   2   3    7.94    0.50
   3   2   3    8.19    0.80
  -4  -2  -3   33.16    1.68
  -4  -2  -3   33.18    1.24
   4   2   3   34.23    0.90
   4   2   3   31.31    1.46
   4   2   3   31.24    2.00
  -5  -2  -3    0.27    0.42
  -5  -2  -3    0.02    0.45
   5   2   3   -0.54    0.45
   5   2   3   -0.19    0.68
  -6  -2  -3   20.84    1.78
  -6  -2  -3   22.23    1.54
   6   2   3   17.12    2.34
   6   2   3   19.93    1.61
  -7  -2  -3    2.05    0.97
  -7  -2  -3    1.43    0.79
   7   2   3    1.48    1.35
   7   2   3    1.54    0.75
  -8  -2  -3    0.29    1.06
  -8  -2  -3   -0.96    0.95
   8   2   3    1.07    1.78
   8   2   3    0.67    0.72
  -9  -2  -3   -2.78    1.44
  -9  -2  -3   -0.60    1.78
   9   2   3    1.21    1.05
   9   2   3   -1.90    2.11
 -10  -2  -3    1.60    2.58
  10   2   3   -0.79    2.88
   9  -3  -3    4.45    3.16
  -9   3   3   -3.96    2.90
   8  -3  -3    5.33    2.52
   8  -3  -3    7.75    2.93
  -8   3   3    3.39    2.28
   7  -3  -3    2.85    2.00
   7  -3  -3    0.50    1.62
  -7   3   3    2.60    1.49
   6  -3  -3    7.10    1.66
   6  -3  -3    7.13    1.76
  -6   3   3    6.51    0.77
  -6   3   3    6.49    1.30
   5  -3  -3    2.48    1.16
   5  -3  -3    2.51    0.52
   5  -3  -3    3.25    1.09
  -5   3   3    2.96    0.81
  -5   3   3    3.07    0.51
   4  -3  -3   12.16    0.90
   4  -3  -3   11.17    1.91
   4  -3  -3   12.42    1.55
  -4   3   3   10.98    0.87
  -4   3   3   13.08    1.22
   3  -3  -3    6.67    1.12
   3  -3  -3    4.34    0.98
   3  -3  -3    5.80    0.64
  -3   3   3    7.09    0.82
  -3   3   3    5.98    0.68
   2  -3  -3   39.05    1.01
   2  -3  -3   38.98    1.70
   2  -3  -3   40.40    2.15
  -2   3   3   39.86    1.38
  -2   3   3   40.01    1.25
   1  -3  -3   89.96    2.40
   1  -3  -3   88.23    2.85
  -1   3   3   86.44    1.90
  -1   3   3   91.54    1.58
  -1   3   3   87.07    1.88
   0  -3  -3    0.38    0.47
   0  -3  -3   -0.36    0.41
   0   3   3    0.23    0.16
   0   3   3   -0.08    0.27
   0   3   3   -0.16    0.20
  -1  -3  -3    5.97    0.89
  -1  -3  -3    5.75    0.71
   1   3   3    5.26    0.61
   1   3   3    5.46    0.59
  -2  -3  -3   27.44    1.37
   2   3   3   26.34    0.90
   2   3   3   25.34    1.15
   2   3   3   25.85    1.44
  -3  -3  -3   62.79    2.21
  -3  -3  -3   61.70    1.44
   3   3   3   62.58    1.37
   3   3   3   63.56    2.45
   3   3   3   60.37    1.95
  -4  -3  -3    0.66    0.47
  -4  -3  -3    0.66    0.36
   4   3   3    0.49    0.18
   4   3   3    0.74    0.64
   4   3   3    0.23    0.43
  -5  -3  -3    0.99    0.54
  -5  -3  -3    0.89    0.60
   5   3   3    0.46    0.78
   5   3   3    0.52    0.62
  -6  -3  -3    0.95    0.65
  -6  -3  -3    0.84    0.71
   6   3   3    0.99    0.69
   6   3   3    0.95    0.97
  -7  -3  -3    0.32    0.80
  -7  -3  -3    0.17    0.75
   7   3   3    0.18    1.17
   7   3   3    0.05    0.71
  -8  -3  -3    2.55    1.22
  -8  -3  -3    3.56    1.77
   8   3   3    3.19    1.02
   8   3   3    3.78    1.93
  -9  -3  -3   -1.95    2.05
  -9  -3  -3   -2.90    1.34
   9   3   3    1.39    2.40
   9   3   3    0.77    0.96
 -10  -3  -3   -4.85    2.53
  10   3   3    1.34    2.91
   9  -4  -3   -2.24    3.21
   9  -4  -3    2.53    2.84
  -9   4   3   -3.16    2.91
   8  -4  -3    0.09    2.24
   8  -4  -3   -0.60    2.53
  -8   4   3   -3.84    1.97
   7  -4  -3    7.03    2.27
   7  -4  -3    7.67    2.36
  -7   4   3   10.23    2.06
   6  -4  -3   -0.52    1.12
   6  -4  -3   -1.08    0.99
  -6   4   3    0.21    0.41
  -6   4   3   -0.44    0.75
   5  -4  -3   56.34    3.20
   5  -4  -3   56.54    3.51
   5  -4  -3   56.59    1.39
  -5   4   3   56.14    1.86
  -5   4   3   53.73    2.43
   4  -4  -3   11.26    1.66
   4  -4  -3   12.16    1.61
  -4   4   3   11.70    1.16
  -4   4   3   12.08    1.06
   3  -4  -3   25.08    2.11
   3  -4  -3   23.89    1.68
  -3   4   3   23.78    1.28
  -3   4   3   23.86    1.18
   2  -4  -3  110.21    1.81
   2  -4  -3  111.60    3.57
   2  -4  -3  109.18    3.18
   2  -4  -3  107.96    1.76
  -2   4   3  111.58    2.54
  -2   4   3  114.09    2.46
   1  -4  -3    7.86    1.09
   1  -4  -3    8.61    1.36
  -1   4   3    8.49    0.46
  -1   4   3    8.81    0.63
  -1   4   3    9.34    0.84
   0  -4  -3   23.54    1.53
   0  -4  -3   20.98    1.45
   0   4   3   22.60    0.91
   0   4   3   23.91    1.06
   0   4   3   20.46    0.70
  -1  -4  -3    1.91    0.64
  -1  -4  -3    1.73    0.46
   1   4   3    1.37    0.39
   1   4   3    1.46    0.42
  -2  -4  -3    0.31    0.49
   2   4   3    0.24    0.47
   2   4   3    0.34    0.30
   2   4   3    0.20    0.35
  -3  -4  -3   42.10    1.22
  -3  -4  -3   43.51    2.02
   3   4   3   42.86    1.72
   3   4   3   44.73    1.23
   3   4   3   43.33    2.08
  -4  -4  -3    6.23    0.90
  -4  -4  -3    4.59    0.91
   4   4   3    4.28    0.77
   4   4   3    4.79    0.50
   4   4   3    4.27    0.98
  -5  -4  -3   11.19    1.28
  -5  -4  -3   12.33    1.57
   5   4   3    9.57    1.40
   5   4   3    9.05    1.51
  -6  -4  -3    0.51    0.69
  -6  -4  -3    0.90    0.79
   6   4   3    0.33    0.74
   6   4   3    0.12    1.00
  -7  -4  -3   -0.50    0.83
  -7  -4  -3   -0.41    0.78
   7   4   3   -0.28    0.72
   7   4   3    0.41    1.37
  -8  -4  -3   -1.00    1.57
  -8  -4  -3   -0.08    0.98
   8   4   3    0.26    1.89
   8   4   3    0.74    1.03
  -9  -4  -3   -2.65    2.24
   9   4   3   -0.22    2.66
   9   4   3    1.02    1.22
 -10  -4  -3   -4.32    3.10
  10   4   3   -1.19    3.11
   9  -5  -3   -1.16    3.46
   9  -5  -3    1.97    2.99
  -9   5   3   -3.63    2.79
   8  -5  -3   -1.62    2.64
   8  -5  -3    1.42    2.34
  -8   5   3   -2.83    2.11
   7  -5  -3    0.08    1.83
   7  -5  -3    2.11    2.05
  -7   5   3    0.69    1.38
   6  -5  -3    4.04    1.61
   6  -5  -3    5.29    1.62
  -6   5   3    3.65    0.67
  -6   5   3    3.72    1.10
   5  -5  -3   25.10    2.47
   5  -5  -3   27.39    2.91
  -5   5   3   27.21    1.89
  -5   5   3   25.96    1.54
   4  -5  -3   23.42    2.40
   4  -5  -3   25.54    2.11
  -4   5   3   24.45    1.52
  -4   5   3   26.64    1.54
   3  -5  -3    2.22    0.76
   3  -5  -3    1.53    0.90
  -3   5   3    2.40    0.57
  -3   5   3    2.64    0.54
   2  -5  -3    8.48    1.21
   2  -5  -3    7.48    1.16
  -2   5   3    8.31    0.73
  -2   5   3    9.28    0.97
   1  -5  -3    6.27    0.98
   1  -5  -3    6.90    1.14
  -1   5   3    7.30    0.49
  -1   5   3    6.84    0.60
  -1   5   3    7.53    0.83
   0  -5  -3    2.75    0.70
   0  -5  -3    1.61    0.72
   0  -5  -3    1.72    0.34
   0   5   3    1.84    0.39
   0   5   3    2.13    0.46
  -1  -5  -3   34.08    1.94
  -1  -5  -3   34.89    1.63
   1   5   3   34.33    1.33
   1   5   3   33.89    1.27
  -2  -5  -3    9.63    1.35
   2   5   3    9.46    1.00
   2   5   3    9.59    0.81
   2   5   3    9.49    1.10
  -3  -5  -3    7.32    0.72
  -3  -5  -3    7.76    1.30
   3   5   3    6.87    1.02
   3   5   3    7.53    0.74
   3   5   3    7.57    1.23
  -4  -5  -3    4.09    0.95
  -4  -5  -3    4.44    0.68
   4   5   3    3.15    0.90
   4   5   3    3.55    0.81
   4   5   3    3.83    0.46
  -5  -5  -3    0.59    0.82
  -5  -5  -3   -0.02    0.59
   5   5   3    0.04    0.18
   5   5   3   -0.83    0.62
   5   5   3    0.86    0.94
  -6  -5  -3    2.67    0.85
  -6  -5  -3    2.70    1.11
   6   5   3    3.64    1.08
   6   5   3    2.19    1.35
  -7  -5  -3   -0.09    0.79
  -7  -5  -3   -0.51    1.16
   7   5   3    0.81    0.97
   7   5   3    1.17    1.64
  -8  -5  -3    0.28    1.00
  -8  -5  -3   -1.99    1.80
   8   5   3    0.93    2.23
   8   5   3    0.60    1.06
  -9  -5  -3   -2.97    2.66
   9   5   3    1.42    2.93
   9   5   3    2.74    1.57
 -10  -5  -3   -4.81    3.27
  10   5   3   -0.79    3.21
  10   5   3    3.75    1.71
   9  -6  -3   -1.72    3.34
   9  -6  -3    5.53    3.11
   8  -6  -3    0.36    2.73
   8  -6  -3    2.28    2.60
  -8   6   3   -4.11    2.05
   7  -6  -3    3.92    2.27
   7  -6  -3    5.08    2.36
  -7   6   3    4.33    1.76
   6  -6  -3    7.96    2.16
   6  -6  -3    8.89    1.98
  -6   6   3    9.81    1.30
  -6   6   3    9.10    1.55
   5  -6  -3   -0.59    1.04
   5  -6  -3    0.29    0.98
  -5   6   3    0.74    0.62
  -5   6   3    0.66    0.58
   4  -6  -3    9.17    1.46
   4  -6  -3   11.44    1.73
  -4   6   3   11.85    1.20
  -4   6   3   13.03    1.38
   3  -6  -3    0.05    0.67
   3  -6  -3    0.43    0.86
  -3   6   3    0.27    0.38
  -3   6   3    0.89    0.56
   2  -6  -3   66.02    2.84
   2  -6  -3   66.18    2.91
  -2   6   3   65.42    2.01
  -2   6   3   66.84    2.12
   1  -6  -3   14.82    1.54
   1  -6  -3   15.41    1.59
  -1   6   3   14.48    0.85
  -1   6   3   14.85    0.74
  -1   6   3   14.32    1.14
   0  -6  -3   58.14    2.59
   0  -6  -3   58.54    1.64
   0  -6  -3   58.48    2.35
   0   6   3   60.74    1.89
   0   6   3   58.70    1.68
  -1  -6  -3   14.72    0.73
  -1  -6  -3   15.36    1.69
  -1  -6  -3   14.70    1.21
   1   6   3   15.47    1.08
   1   6   3   15.38    1.09
  -2  -6  -3   19.06    1.85
  -2  -6  -3   19.41    1.32
   2   6   3   17.30    1.07
   2   6   3   18.98    1.30
  -3  -6  -3    3.58    1.03
  -3  -6  -3    3.05    0.50
   3   6   3    3.14    0.86
   3   6   3    2.41    0.51
   3   6   3    3.08    0.76
  -4  -6  -3    1.66    0.93
  -4  -6  -3    1.50    0.58
   4   6   3    1.56    0.45
   4   6   3    0.67    0.70
   4   6   3    1.36    0.91
  -5  -6  -3   10.31    1.30
  -5  -6  -3    7.84    1.47
   5   6   3    8.85    1.57
   5   6   3    8.90    1.30
   5   6   3   10.50    0.73
  -6  -6  -3    1.10    0.71
  -6  -6  -3    0.71    1.13
   6   6   3    0.21    1.26
   6   6   3    0.78    0.94
  -7  -6  -3    1.85    1.60
  -7  -6  -3    1.60    0.90
   7   6   3    2.83    1.23
   7   6   3    2.06    1.95
  -8  -6  -3    3.74    2.63
   8   6   3    7.93    2.99
   8   6   3    8.32    1.88
  -9  -6  -3   -5.61    2.95
   9   6   3    2.23    1.65
   9   6   3   -0.19    3.09
 -10  -6  -3   -6.34    3.31
  10   6   3    1.55    1.79
  10   6   3    0.87    3.21
   9  -7  -3   -2.19    3.52
   9  -7  -3    0.93    3.06
   8  -7  -3    2.61    3.10
   8  -7  -3    2.73    2.68
  -8   7   3   -1.87    2.18
   7  -7  -3   -0.55    2.16
   7  -7  -3    0.68    1.86
  -7   7   3   -2.36    1.31
   6  -7  -3   -0.43    1.43
   6  -7  -3    0.17    1.37
  -6   7   3    0.56    0.65
  -6   7   3   -0.43    0.86
   5  -7  -3    0.37    1.19
   5  -7  -3    0.11    1.02
  -5   7   3    0.11    0.59
  -5   7   3    0.30    0.66
   4  -7  -3   13.25    2.11
   4  -7  -3   10.86    1.72
  -4   7   3   13.12    1.31
  -4   7   3   14.41    1.55
   3  -7  -3    5.43    1.22
   3  -7  -3    6.14    1.36
  -3   7   3    5.98    0.90
  -3   7   3    7.34    0.91
   2  -7  -3    3.05    1.05
   2  -7  -3    1.45    0.87
  -2   7   3    2.32    0.66
  -2   7   3    2.32    0.51
  -2   7   3    2.70    0.37
   1  -7  -3   17.29    1.81
   1  -7  -3   16.57    1.13
   1  -7  -3   16.57    1.83
  -1   7   3   16.80    1.31
  -1   7   3   16.63    0.88
   0  -7  -3   -0.23    0.76
   0  -7  -3    0.31    0.32
   0  -7  -3    0.02    0.59
   0   7   3    0.46    0.46
   0   7   3    0.13    0.37
  -1  -7  -3   -0.05    0.23
  -1  -7  -3    0.21    0.81
  -1  -7  -3   -0.17    0.39
   1   7   3   -0.07    0.43
   1   7   3    0.05    0.46
  -2  -7  -3    0.26    0.41
  -2  -7  -3    0.03    0.25
  -2  -7  -3    0.22    0.88
   2   7   3    0.21    0.46
   2   7   3    0.38    0.53
  -3  -7  -3    9.90    0.90
  -3  -7  -3    9.64    1.59
   3   7   3   10.12    1.43
   3   7   3   11.49    1.12
   3   7   3   10.87    1.63
  -4  -7  -3    1.51    1.10
  -4  -7  -3    1.02    0.54
   4   7   3    1.29    0.80
   4   7   3    0.86    0.48
   4   7   3    1.56    0.97
  -5  -7  -3   10.72    1.32
  -5  -7  -3    8.69    1.73
   5   7   3    8.75    1.37
   5   7   3    9.44    1.12
   5   7   3    9.51    1.73
  -6  -7  -3    1.53    0.72
  -6  -7  -3    1.20    1.38
   6   7   3    0.66    1.04
   6   7   3    2.28    1.60
  -7  -7  -3    2.28    0.96
  -7  -7  -3    2.94    2.31
   7   7   3    3.81    1.55
   7   7   3    1.68    1.96
  -8  -7  -3    0.53    2.85
   8   7   3    2.66    2.74
   8   7   3    3.87    1.77
  -9  -7  -3   -5.58    3.43
   9   7   3    0.80    3.22
   9   7   3    4.02    1.99
  10   7   3    2.32    2.03
  10   7   3    2.53    3.73
   9  -8  -3   -3.79    3.34
   9  -8  -3    1.55    2.93
   8  -8  -3    5.28    3.02
   8  -8  -3    1.18    2.93
  -8   8   3   -2.04    2.31
   7  -8  -3   12.18    2.96
   7  -8  -3   10.65    3.01
  -7   8   3   11.85    2.50
   6  -8  -3    0.40    1.43
   6  -8  -3    0.95    1.82
  -6   8   3    0.22    0.75
  -6   8   3   -0.70    1.00
   5  -8  -3    2.29    1.27
   5  -8  -3    1.10    1.29
  -5   8   3    2.23    0.84
  -5   8   3    1.99    0.88
   4  -8  -3    0.27    0.95
   4  -8  -3    0.77    0.94
  -4   8   3    0.56    0.56
  -4   8   3   -0.31    0.67
   3  -8  -3    3.01    1.18
   3  -8  -3    3.19    1.16
  -3   8   3    3.00    0.65
  -3   8   3    2.82    0.79
   2  -8  -3    0.61    0.90
   2  -8  -3    0.95    0.95
  -2   8   3    0.97    0.65
  -2   8   3    0.65    0.41
  -2   8   3    0.59    0.27
   1  -8  -3   10.61    1.60
   1  -8  -3   13.24    1.92
   1  -8  -3   12.24    1.18
  -1   8   3   11.19    0.87
  -1   8   3   12.70    1.48
   0  -8  -3   12.88    1.76
   0  -8  -3   11.87    1.04
   0  -8  -3   10.25    1.67
   0   8   3   12.38    1.33
   0   8   3   11.32    1.08
  -1  -8  -3    0.65    1.02
  -1  -8  -3    1.49    0.42
  -1  -8  -3    1.71    0.72
   1   8   3    1.06    0.60
   1   8   3    1.00    0.60
  -2  -8  -3   -0.09    0.29
  -2  -8  -3   -0.02    0.40
  -2  -8  -3    0.52    1.08
   2   8   3   -0.12    0.53
   2   8   3   -0.38    0.63
  -3  -8  -3    2.35    0.55
  -3  -8  -3    1.54    1.17
   3   8   3    0.83    0.82
   3   8   3    1.47    0.61
   3   8   3    1.49    0.92
  -4  -8  -3    4.15    0.71
  -4  -8  -3    3.71    1.49
   4   8   3    3.76    1.25
   4   8   3    3.69    0.68
   4   8   3    2.64    0.96
  -5  -8  -3    1.65    1.49
  -5  -8  -3    1.95    0.64
   5   8   3    1.38    1.27
   5   8   3    0.76    0.96
  -6  -8  -3    2.32    1.95
  -6  -8  -3    3.53    0.84
   6   8   3    4.10    1.50
   6   8   3    3.37    1.90
  -7  -8  -3   -0.12    2.36
   7   8   3    2.81    1.51
   7   8   3   -2.06    2.10
  -8  -8  -3   -4.10    2.98
   8   8   3    3.41    1.87
   8   8   3    0.26    2.93
   9   8   3    2.04    2.01
   9   8   3   -2.79    3.23
   9  -9  -3   -3.51    3.54
   9  -9  -3    0.68    2.83
   8  -9  -3   -2.49    3.15
   8  -9  -3    1.79    2.71
   7  -9  -3    2.41    2.21
   7  -9  -3    0.87    2.66
  -7   9   3    0.99    0.90
  -7   9   3   -0.88    1.81
   6  -9  -3    1.99    2.04
   6  -9  -3    1.91    1.41
  -6   9   3   -0.70    1.15
  -6   9   3    0.14    0.90
   5  -9  -3    0.36    1.10
   5  -9  -3   -0.32    1.31
  -5   9   3   -0.51    0.79
  -5   9   3    0.03    0.84
   4  -9  -3    0.49    1.01
   4  -9  -3    1.57    1.20
  -4   9   3    0.01    0.52
  -4   9   3    0.18    0.76
   3  -9  -3    1.27    1.05
   3  -9  -3    1.32    1.07
  -3   9   3    0.86    0.82
  -3   9   3    1.04    0.55
   2  -9  -3   -0.11    1.01
   2  -9  -3    0.89    1.02
  -2   9   3    1.13    0.36
  -2   9   3    1.28    0.78
   1  -9  -3    0.25    0.53
   1  -9  -3    0.33    0.91
   1  -9  -3    0.10    1.01
  -1   9   3    0.58    0.65
  -1   9   3    0.66    0.44
   0  -9  -3    2.01    0.93
   0  -9  -3    0.89    1.17
   0  -9  -3    1.87    0.59
   0   9   3    1.92    0.63
   0   9   3    2.01    0.75
  -1  -9  -3    0.32    1.19
  -1  -9  -3    1.01    0.74
  -1  -9  -3    0.61    0.42
   1   9   3    1.17    0.72
   1   9   3    0.45    0.63
  -2  -9  -3    1.54    1.27
  -2  -9  -3    1.16    0.67
  -2  -9  -3    1.03    0.44
   2   9   3    1.57    0.83
   2   9   3    0.99    0.72
  -3  -9  -3    3.18    0.64
  -3  -9  -3    2.72    1.48
  -3  -9  -3    2.69    0.79
   3   9   3    2.58    0.78
   3   9   3    3.52    1.10
  -4  -9  -3   11.06    1.13
  -4  -9  -3   10.70    2.25
   4   9   3    9.52    1.45
   4   9   3    9.25    1.58
   4   9   3    9.50    1.29
  -5  -9  -3    1.38    0.60
  -5  -9  -3    0.39    1.79
   5   9   3    1.00    1.35
   5   9   3    0.97    1.11
  -6  -9  -3    0.67    2.23
   6   9   3    0.25    1.33
   6   9   3   -0.01    1.71
  -7  -9  -3   -4.94    2.59
   7   9   3   -0.35    1.53
   7   9   3   -1.54    2.12
  -8  -9  -3   -4.43    3.93
   8   9   3    1.75    3.13
   8   9   3    8.05    2.39
   9   9   3   -1.77    3.50
   9   9   3    4.71    2.26
   8 -10  -3    0.77    3.31
   8 -10  -3    2.00    2.48
  -8  10   3   -5.00    2.42
   7 -10  -3    0.41    2.90
   7 -10  -3    2.22    2.09
  -7  10   3   -1.82    1.80
  -7  10   3   -0.31    1.16
   6 -10  -3   -0.60    2.25
   6 -10  -3    0.63    1.21
  -6  10   3   -0.55    1.44
  -6  10   3   -0.86    1.04
   5 -10  -3    2.83    1.42
   5 -10  -3    4.10    2.10
  -5  10   3    4.87    1.48
  -5  10   3    3.92    1.34
   4 -10  -3    4.91    1.38
   4 -10  -3    5.73    1.70
  -4  10   3    4.22    1.19
  -4  10   3    6.93    1.28
   3 -10  -3    0.86    0.92
   3 -10  -3    0.56    1.14
  -3  10   3    0.29    0.80
  -3  10   3    0.47    0.54
   2 -10  -3    2.74    1.10
   2 -10  -3    3.81    0.92
   2 -10  -3    3.23    1.37
  -2  10   3    3.58    0.53
  -2  10   3    3.51    1.02
   1 -10  -3   16.44    2.19
   1 -10  -3   17.61    1.55
   1 -10  -3   19.09    2.61
  -1  10   3   18.40    1.99
  -1  10   3   17.45    1.26
   0 -10  -3    1.97    1.04
   0 -10  -3    2.52    1.41
   0 -10  -3    2.32    0.69
   0  10   3    2.39    0.72
   0  10   3    3.13    0.95
  -1 -10  -3    5.98    0.83
  -1 -10  -3    5.36    1.21
  -1 -10  -3    4.59    1.55
   1  10   3    5.08    1.02
   1  10   3    6.07    1.09
  -2 -10  -3   17.52    1.27
  -2 -10  -3   18.91    1.86
  -2 -10  -3   19.00    3.03
   2  10   3   18.46    1.93
   2  10   3   17.35    2.02
  -3 -10  -3    0.88    1.56
  -3 -10  -3    0.82    0.59
  -3 -10  -3    0.60    0.44
   3  10   3   -0.39    0.66
   3  10   3    0.83    1.01
  -4 -10  -3    1.60    0.65
  -4 -10  -3    0.98    0.52
  -4 -10  -3    2.23    1.87
   4  10   3    1.01    1.08
   4  10   3    1.29    0.66
  -5 -10  -3    4.59    2.41
   5  10   3    3.23    1.58
   5  10   3    3.45    1.61
  -6 -10  -3    4.01    3.22
   6  10   3    5.31    2.30
   6  10   3    9.31    2.17
  -7 -10  -3   -3.06    3.64
   7  10   3   -0.02    2.52
   7  10   3    0.90    1.86
  -8 -10  -3   -6.95    3.93
   8  10   3   -4.63    2.92
   8  10   3    1.59    2.14
   9  10   3   -6.05    3.57
   9  10   3    5.43    2.39
   8 -11  -3   -1.88    3.45
   7 -11  -3    3.11    3.41
   7 -11  -3   -0.70    1.71
  -7  11   3   -0.77    1.47
  -7  11   3   -5.02    2.07
   6 -11  -3    1.80    2.58
   6 -11  -3    1.84    1.51
  -6  11   3   -1.15    1.55
  -6  11   3   -0.52    1.41
   5 -11  -3    3.66    1.32
   5 -11  -3    6.17    2.42
  -5  11   3    2.38    1.41
  -5  11   3    4.62    1.57
   4 -11  -3    7.57    2.26
   4 -11  -3    6.06    1.40
  -4  11   3   11.03    1.81
  -4  11   3    6.79    1.57
   3 -11  -3    0.35    0.80
   3 -11  -3   -0.59    1.23
  -3  11   3    0.29    0.97
  -3  11   3    0.17    0.39
   2 -11  -3    0.50    0.90
   2 -11  -3    0.78    1.31
   2 -11  -3   -0.24    0.64
  -2  11   3   -0.15    0.90
   1 -11  -3    3.37    1.60
   1 -11  -3    4.33    0.94
   1 -11  -3    3.14    1.13
  -1  11   3    3.94    1.15
  -1  11   3    3.52    0.72
   0 -11  -3    0.61    0.61
   0 -11  -3    0.09    0.97
   0 -11  -3    0.66    1.29
   0  11   3    0.75    0.96
   0  11   3    0.37    0.65
  -1 -11  -3    1.35    0.57
  -1 -11  -3    0.52    1.45
  -1 -11  -3    0.53    1.01
   1  11   3    1.11    0.94
   1  11   3    2.10    0.89
  -2 -11  -3   27.35    2.32
  -2 -11  -3   28.92    1.65
  -2 -11  -3   31.72    3.81
   2  11   3   30.86    2.44
   2  11   3   29.88    2.42
  -3 -11  -3   12.31    2.64
  -3 -11  -3   16.91    1.34
  -3 -11  -3   13.99    1.76
   3  11   3   16.59    1.99
   3  11   3   14.79    2.15
  -4 -11  -3    0.83    2.27
  -4 -11  -3    0.95    0.68
   4  11   3    0.28    0.67
   4  11   3    0.59    1.37
  -5 -11  -3    1.36    2.96
   5  11   3    0.87    1.57
  -6 -11  -3   -1.17    3.43
   6  11   3   -2.26    1.89
   6  11   3    1.59    1.77
  -7 -11  -3   -3.87    4.14
   7  11   3    1.40    2.74
   7  11   3    1.13    1.97
   8  11   3   -5.75    3.11
   8  11   3    3.59    2.40
   7 -12  -3    4.37    3.65
  -7  12   3   -3.60    2.08
  -7  12   3    0.11    1.80
   6 -12  -3   13.19    3.80
  -6  12   3    6.08    2.12
  -6  12   3    9.75    2.48
   5 -12  -3    0.76    2.51
  -5  12   3   -0.96    1.62
  -5  12   3   -0.43    1.47
   4 -12  -3    1.01    2.07
  -4  12   3    0.22    0.87
  -4  12   3    0.28    1.57
   3 -12  -3    3.39    2.09
  -3  12   3    2.93    0.89
  -3  12   3    2.36    1.46
   2 -12  -3    0.16    0.74
   2 -12  -3   -0.12    1.54
  -2  12   3   -0.30    1.13
   1 -12  -3    1.13    0.75
   1 -12  -3    2.30    1.67
  -1  12   3    2.28    1.27
  -1  12   3    1.16    0.61
   0 -12  -3   31.65    4.18
   0 -12  -3   26.81    1.89
   0  12   3   28.92    2.67
   0  12   3   30.05    2.02
  -1 -12  -3    0.30    0.53
  -1 -12  -3   -0.08    1.82
   1  12   3    0.99    0.83
   1  12   3    1.77    1.12
  -2 -12  -3    2.90    0.74
  -2 -12  -3    2.07    2.03
   2  12   3    2.41    1.17
   2  12   3    2.43    1.19
  -3 -12  -3    0.02    0.84
  -3 -12  -3    0.76    2.08
   3  12   3    1.29    0.97
   3  12   3    1.67    1.36
  -4 -12  -3    0.11    2.79
  -4 -12  -3    2.39    0.88
   4  12   3    3.11    1.79
   4  12   3    1.15    0.84
  -5 -12  -3    2.30    3.60
   5  12   3    3.99    2.14
  -6 -12  -3   -3.85    4.05
   6  12   3    1.44    2.22
  -7 -12  -3   -6.60    4.82
   7  12   3   -2.55    2.67
   7  12   3    3.86    2.43
   8  12   3    0.58    4.37
   8  12   3    3.64    2.51
   7 -13  -3    4.03    3.74
  -7  13   3   -1.16    2.35
  -7  13   3    3.99    2.22
   6 -13  -3    3.52    3.45
  -6  13   3   -1.35    1.86
  -6  13   3   -2.42    2.00
   5 -13  -3    3.36    3.15
  -5  13   3   -0.08    1.95
  -5  13   3    4.40    1.85
   4 -13  -3   -0.76    2.63
  -4  13   3   -4.07    1.75
  -4  13   3    0.47    1.21
   3 -13  -3    5.55    2.59
  -3  13   3    2.19    1.95
   2 -13  -3    9.70    1.65
   2 -13  -3   12.16    3.07
  -2  13   3   10.98    2.18
   1 -13  -3   -1.58    1.80
   1 -13  -3   -0.16    0.70
  -1  13   3    0.37    1.47
   0 -13  -3    0.39    0.66
   0 -13  -3   -0.17    2.08
   0  13   3    0.28    1.53
   0  13   3    0.02    0.75
  -1 -13  -3   -0.73    2.13
  -1 -13  -3    0.23    0.54
   1  13   3   -0.79    0.87
   1  13   3   -1.50    1.40
  -2 -13  -3    1.87    2.51
  -2 -13  -3    0.07    0.58
   2  13   3   -0.90    1.31
   2  13   3    2.01    1.38
  -3 -13  -3   -0.75    2.96
   3  13   3    0.26    1.57
   3  13   3   -1.08    1.01
  -4 -13  -3    4.28    3.74
   4  13   3    7.18    2.10
   4  13   3    4.12    1.50
  -5 -13  -3   -0.01    4.31
   5  13   3    3.80    2.42
  -6 -13  -3   -2.02    4.66
   6  13   3    3.39    2.55
   7  13   3    3.76    2.36
   6 -14  -3    1.21    3.57
  -6  14   3    0.71    2.21
  -6  14   3   -2.84    2.29
   5 -14  -3    3.44    3.46
  -5  14   3    7.55    1.99
  -5  14   3    1.21    2.24
   4 -14  -3    0.11    2.87
  -4  14   3   -0.89    2.25
   3 -14  -3    6.59    3.21
  -3  14   3   -2.83    2.00
   2 -14  -3    0.23    1.11
   2 -14  -3    1.83    2.64
  -2  14   3   -1.35    2.03
   1 -14  -3   -0.21    0.85
   1 -14  -3    2.37    2.86
  -1  14   3   -1.25    1.78
   0 -14  -3    4.79    1.13
   0 -14  -3    9.34    3.16
   0  14   3    5.06    1.14
   0  14   3    4.53    2.19
  -1 -14  -3    0.37    0.59
  -1 -14  -3    1.62    3.19
   1  14   3   -2.17    1.80
   1  14   3    1.16    1.19
  -2 -14  -3    7.71    3.74
   2  14   3    5.63    1.86
  -3 -14  -3    1.16    3.72
   3  14   3    1.27    1.97
   3  14   3   -1.32    1.36
  -4 -14  -3    0.49    4.65
   4  14   3    1.92    2.31
  -5 -14  -3    0.64    4.89
   5  14   3    2.21    2.52
  -6 -14  -3   -6.73    5.19
   6  14   3    3.12    2.56
   5 -15  -3    2.34    3.57
  -5  15   3    3.52    1.89
  -5  15   3   -3.24    2.52
   4 -15  -3    6.66    3.73
  -4  15   3    8.39    1.66
   3 -15  -3    7.24    3.47
  -3  15   3   -0.54    2.49
   2 -15  -3   -0.73    3.36
  -2  15   3   -1.99    2.58
   1 -15  -3    3.60    3.54
   1 -15  -3    1.06    1.18
  -1  15   3   -1.66    2.46
   0 -15  -3    4.26    3.75
   0 -15  -3   -0.60    0.76
   0  15   3   -1.31    2.16
  -1 -15  -3    2.90    3.54
   1  15   3    0.90    1.40
   1  15   3   -2.90    2.26
  -2 -15  -3    4.30    4.36
   2  15   3    3.84    1.94
  -3 -15  -3    2.05    4.80
   3  15   3    3.36    2.40
   3  15   3    1.01    1.91
  -4 -15  -3    4.12    5.36
   4  15   3    5.17    2.58
  -5 -15  -3   -3.55    5.10
   5  15   3    2.80    2.62
  -6 -15  -3  -12.15    5.60
   4 -16  -3    0.67    3.28
   3 -16  -3    7.41    3.80
  -3  16   3   -0.79    2.96
   2 -16  -3    9.82    3.95
  -2  16   3   -3.53    2.63
   1 -16  -3    2.28    4.12
   1 -16  -3   -0.02    1.31
  -1  16   3   -5.09    2.53
   0 -16  -3    4.60    4.16
   0  16   3   -2.87    2.73
  -1 -16  -3    1.14    4.35
   1  16   3    1.24    1.71
   1  16   3   -4.49    2.55
  -2 -16  -3    6.13    4.75
   2  16   3    2.24    2.14
   2  16   3   -1.24    2.46
  -3 -16  -3    7.33    5.15
   3  16   3    3.21    2.48
   3  16   3   -2.92    2.28
  -4 -16  -3    2.28    5.12
   4  16   3    7.93    2.89
   2 -17  -3    6.01    4.26
  -2  17   3   -3.83    2.79
   1 -17  -3    8.70    4.35
  -1  17   3   -2.21    2.82
   0 -17  -3    5.36    4.34
   0  17   3   -6.46    2.83
  -1 -17  -3    6.83    4.83
   1  17   3   -5.26    2.54
  -2 -17  -3   12.75    4.97
   2  17   3    4.72    2.31
  -3 -17  -3   14.19    5.43
   2  14  -4    9.01    3.58
  -2 -14   4   11.34    4.50
   1  14  -4    8.17    3.12
  -1 -14   4   11.22    4.44
   0  14  -4   -6.13    2.71
   0  14  -4    9.90    3.14
   0 -14   4    3.08    2.56
   0 -14   4   13.63    4.35
   1 -14   4   11.18    3.85
   1 -14   4   -0.12    2.62
  -2  14  -4   -6.21    2.57
   2 -14   4    7.77    3.71
   2 -14   4    0.79    2.71
  -3  14  -4   -7.23    2.84
   3 -14   4   -3.01    2.78
   3 -14   4    3.13    3.53
  -4 -13   4    4.47    2.26
  -4 -13   4    1.31    4.85
   3  13  -4    7.39    3.37
  -3 -13   4    5.35    4.92
  -3 -13   4    3.68    2.12
   2  13  -4   10.54    3.34
  -2 -13   4   11.91    4.42
  -2 -13   4   10.42    2.60
   1  13  -4    1.26    2.82
  -1 -13   4    9.34    3.95
  -1 -13   4    2.34    2.16
   0  13  -4    3.89    2.55
   0  13  -4   -5.20    2.10
   0 -13   4    0.75    2.16
   0 -13   4    8.24    3.97
  -1  13  -4   -4.64    2.22
  -1  13  -4    1.99    2.17
   1 -13   4   -1.93    2.25
   1 -13   4    6.19    3.42
  -2  13  -4   -2.93    2.62
   2 -13   4    8.86    3.52
   2 -13   4    3.79    2.73
  -3  13  -4   -4.44    2.36
   3 -13   4    3.16    2.82
   3 -13   4    3.86    3.31
   4 -13   4    3.54    3.28
   4 -13   4   -1.13    2.93
  -5  13  -4   -5.71    2.42
   5 -13   4   -2.23    3.06
   5 -13   4    4.27    3.62
   5  12  -4    5.85    3.24
  -5 -12   4    6.17    2.29
   4  12  -4    3.69    3.23
  -4 -12   4    3.91    2.06
  -4 -12   4   -0.29    4.69
   3  12  -4    1.62    2.85
  -3 -12   4    4.47    4.11
  -3 -12   4    3.82    2.00
   2  12  -4    0.95    2.81
   2  12  -4   -0.53    1.88
  -2 -12   4    4.82    3.53
  -2 -12   4    4.59    2.04
   1  12  -4    3.60    2.72
   1  12  -4   -2.29    1.86
  -1 -12   4    1.65    1.72
  -1 -12   4    5.39    3.27
   0  12  -4   10.03    2.76
   0 -12   4   10.34    2.52
   0 -12   4   13.23    3.65
  -1  12  -4    3.48    2.01
  -1  12  -4   -4.90    1.97
   1 -12   4    5.09    3.02
   1 -12   4   -0.56    1.92
  -2  12  -4   -1.44    2.03
   2 -12   4    3.37    2.86
   2 -12   4    2.45    2.26
  -3  12  -4   -1.09    1.99
   3 -12   4    1.57    2.93
   3 -12   4   -1.05    2.30
  -4  12  -4   -1.09    2.22
   4 -12   4    2.37    2.97
   4 -12   4   -1.51    2.51
  -5  12  -4   -4.78    2.40
   5 -12   4    1.08    3.33
   5 -12   4    0.07    2.86
   6 -12   4   -1.79    2.96
   6 -12   4    2.35    3.41
   6  11  -4    2.29    3.02
  -6 -11   4    4.81    2.18
   5  11  -4    7.73    3.22
  -5 -11   4    2.27    2.05
  -5 -11   4   -8.74    4.80
   4  11  -4    1.76    3.05
  -4 -11   4    3.01    1.99
  -4 -11   4    1.72    4.36
   3  11  -4    6.43    3.00
  -3 -11   4    8.30    2.14
  -3 -11   4    8.42    3.91
   2  11  -4    4.86    2.87
  -2 -11   4    3.17    1.76
  -2 -11   4    7.09    3.19
   1  11  -4   -1.48    1.31
   1  11  -4    1.97    2.31
  -1 -11   4    1.99    2.43
  -1 -11   4    1.01    1.59
   0  11  -4   -1.56    1.46
   0  11  -4    1.68    2.04
   0 -11   4    4.44    2.60
   0 -11   4    3.79    1.78
  -1  11  -4    2.84    1.75
  -1  11  -4    4.94    1.93
   1 -11   4    7.95    2.21
   1 -11   4    7.82    2.71
  -2  11  -4    0.25    1.52
  -2  11  -4    2.13    1.49
   2 -11   4    4.08    2.36
   2 -11   4    1.52    1.84
  -3  11  -4   -2.03    1.73
   3 -11   4    2.02    2.39
   3 -11   4    0.20    1.99
  -4  11  -4   -1.91    1.76
   4 -11   4    2.57    2.59
   4 -11   4    0.85    2.44
  -5  11  -4   -1.74    2.08
   5 -11   4   -1.79    3.01
   5 -11   4    0.99    2.64
   6 -11   4    2.51    3.15
   6 -11   4   -3.19    2.83
   7 -11   4    3.08    3.62
   6  10  -4    2.08    2.93
  -6 -10   4   -8.60    4.50
  -6 -10   4    2.65    2.10
   5  10  -4   10.10    3.20
  -5 -10   4   -3.04    4.16
  -5 -10   4    6.32    2.22
   4  10  -4    2.67    2.69
  -4 -10   4    3.64    1.81
  -4 -10   4    0.13    3.30
   3  10  -4    4.42    2.51
   3  10  -4   -0.31    0.85
  -3 -10   4    1.29    1.45
  -3 -10   4    0.94    2.96
   2  10  -4    6.41    2.37
   2  10  -4    0.96    1.07
  -2 -10   4    3.70    2.55
  -2 -10   4    4.74    1.56
   1  10  -4    0.75    1.14
   1  10  -4    1.41    1.94
  -1 -10   4    2.84    2.26
  -1 -10   4    1.25    1.37
   0  10  -4   -1.36    1.04
   0  10  -4    1.47    1.82
   0 -10   4    0.93    1.31
   0 -10   4    1.68    1.88
  -1  10  -4    3.37    1.43
  -1  10  -4    2.33    1.64
   1 -10   4    5.15    2.04
   1 -10   4    3.69    1.59
  -2  10  -4    2.78    1.45
  -2  10  -4    1.47    1.29
   2 -10   4    4.00    1.72
   2 -10   4    3.99    2.20
  -3  10  -4   -0.67    1.30
   3 -10   4    3.01    1.74
   3 -10   4    3.65    2.14
  -4  10  -4   -0.04    1.40
   4 -10   4    1.00    2.02
   4 -10   4    1.88    2.02
  -5  10  -4   -2.37    1.48
   5 -10   4    2.60    2.73
   5 -10   4   -0.99    2.11
  -6  10  -4   -3.94    1.68
   6 -10   4    0.00    2.48
   6 -10   4   -0.37    2.88
   7 -10   4    1.05    3.34
  -8  10  -4   16.57    2.29
   7   9  -4    5.47    2.92
  -7  -9   4    7.68    2.45
   6   9  -4    3.07    2.94
  -6  -9   4    2.76    2.06
   5   9  -4    3.49    2.74
  -5  -9   4    1.47    1.78
  -5  -9   4   -1.92    3.21
   4   9  -4   12.38    2.85
  -4  -9   4    9.54    2.07
  -4  -9   4    5.99    3.12
   3   9  -4    1.53    0.74
   3   9  -4    1.61    2.03
  -3  -9   4    0.78    2.22
  -3  -9   4    1.93    1.35
   2   9  -4    0.02    1.89
   2   9  -4   -1.09    0.70
  -2  -9   4    0.64    1.11
  -2  -9   4    2.74    2.11
   1   9  -4    0.50    0.84
   1   9  -4    0.47    1.65
  -1  -9   4    0.55    1.69
  -1  -9   4    0.43    1.03
   0   9  -4    1.69    1.60
   0   9  -4    0.42    0.91
   0  -9   4    1.73    1.55
   0  -9   4    1.61    1.12
  -1   9  -4    6.33    1.26
  -1   9  -4    6.82    1.68
   1  -9   4    6.16    1.89
   1  -9   4    8.05    1.64
  -2   9  -4    0.83    0.92
  -2   9  -4    1.53    1.28
   2  -9   4    0.66    1.48
   2  -9   4    0.26    1.04
  -3   9  -4    5.52    1.33
  -3   9  -4    5.21    1.32
   3  -9   4    7.73    2.06
   3  -9   4    6.46    1.77
  -4   9  -4   -1.13    1.01
   4  -9   4    2.56    2.04
   4  -9   4    0.27    1.49
  -5   9  -4    3.81    1.49
   5  -9   4    5.74    2.49
   5  -9   4    4.57    2.04
  -6   9  -4   -2.02    1.30
   6  -9   4    0.72    2.62
   6  -9   4   -1.64    2.26
  -7   9  -4   -2.38    1.57
   7  -9   4    0.84    3.18
   8  -9   4    2.25    3.61
   7   8  -4    0.67    2.50
  -7  -8   4    4.85    2.48
   6   8  -4    1.99    2.69
  -6  -8   4    3.00    2.00
  -6  -8   4   -5.51    3.31
   5   8  -4    2.76    2.34
  -5  -8   4    1.18    1.41
  -5  -8   4   -1.62    2.68
   4   8  -4    4.70    2.17
  -4  -8   4    0.18    2.11
  -4  -8   4    1.61    1.34
   3   8  -4    1.02    0.62
   3   8  -4    0.25    1.71
  -3  -8   4   -0.41    0.99
  -3  -8   4    1.41    1.94
   2   8  -4   -0.30    0.60
   2   8  -4    0.36    1.43
  -2  -8   4   -0.26    0.91
  -2  -8   4    0.81    1.69
   1   8  -4   -0.32    0.57
   1   8  -4    0.72    1.44
  -1  -8   4   -0.16    0.76
  -1  -8   4    0.37    1.40
   0   8  -4    2.31    0.78
   0   8  -4    1.12    1.34
   0  -8   4    3.08    1.52
   0  -8   4    2.94    1.07
  -1   8  -4    3.14    1.32
  -1   8  -4    2.91    0.81
   1  -8   4    3.25    1.44
   1  -8   4    2.80    1.08
  -2   8  -4   -0.61    1.02
  -2   8  -4    0.47    0.63
   2  -8   4    0.13    1.12
   2  -8   4    0.44    0.90
  -3   8  -4    0.94    0.73
  -3   8  -4   -0.30    0.94
   3  -8   4    1.00    1.35
   3  -8   4    1.57    1.10
  -4   8  -4   -0.35    0.80
   4  -8   4    1.24    1.49
   4  -8   4   -0.26    1.17
  -5   8  -4    0.53    1.02
   5  -8   4   -0.10    1.82
   5  -8   4   -0.34    1.30
  -6   8  -4   -1.28    0.98
   6  -8   4    0.61    2.33
   6  -8   4   -0.80    1.87
  -7   8  -4   -0.17    1.28
   7  -8   4    1.30    3.01
  -8   8  -4    4.01    1.83
  -8   8  -4   -1.45    1.39
   8  -8   4    2.13    3.34
  -9   8  -4    4.21    2.18
   9  -8   4    0.53    3.65
   8   7  -4    1.75    3.03
   8   7  -4    5.25    2.54
  -8  -7   4    5.92    2.78
   7   7  -4    0.51    2.18
   7   7  -4    5.18    2.61
  -7  -7   4   -4.60    3.38
  -7  -7   4    3.90    2.44
   6   7  -4    0.56    1.61
   6   7  -4    2.79    2.41
  -6  -7   4    1.71    1.87
  -6  -7   4   -2.67    2.60
   5   7  -4    2.13    2.02
   5   7  -4    1.05    1.22
  -5  -7   4    0.51    1.32
  -5  -7   4   -1.08    1.98
   4   7  -4    3.98    1.00
   4   7  -4    4.80    1.96
   4   7  -4    3.44    1.15
  -4  -7   4    3.84    1.95
  -4  -7   4    5.91    1.61
   3   7  -4   -0.04    0.42
   3   7  -4    0.14    0.69
   3   7  -4   -0.07    1.35
  -3  -7   4    0.31    0.90
  -3  -7   4    0.83    1.58
   2   7  -4    6.16    1.66
   2   7  -4    5.69    0.85
  -2  -7   4    5.62    1.73
  -2  -7   4    5.89    1.22
   1   7  -4    0.26    0.53
   1   7  -4    0.19    1.24
  -1  -7   4   -0.28    1.28
  -1  -7   4    0.11    0.78
   0   7  -4    0.37    1.12
   0   7  -4   -0.12    0.47
   0  -7   4    0.43    1.13
   0  -7   4    0.36    0.76
  -1   7  -4    4.65    1.23
  -1   7  -4    3.89    0.80
   1  -7   4    3.30    1.27
   1  -7   4    3.41    0.99
  -2   7  -4    0.07    0.96
  -2   7  -4    0.57    0.52
   2  -7   4    0.76    1.12
   2  -7   4    0.30    0.81
  -3   7  -4   24.80    2.09
  -3   7  -4   24.52    1.79
   3  -7   4   27.73    2.88
   3  -7   4   26.71    2.28
  -4   7  -4   -0.93    0.73
  -4   7  -4    0.20    0.63
   4  -7   4   -0.16    0.98
   4  -7   4    0.60    1.21
  -5   7  -4    6.86    1.25
   5  -7   4    6.55    1.57
   5  -7   4    9.48    2.21
  -6   7  -4    2.66    0.98
   6  -7   4    4.55    2.21
   6  -7   4    2.40    1.78
  -7   7  -4    3.88    1.43
   7  -7   4    2.26    2.74
  -8   7  -4    2.09    1.80
   8  -7   4   -1.57    3.00
  -9   7  -4    0.51    2.12
   9  -7   4   -0.18    3.23
   8   6  -4    3.78    2.92
   8   6  -4    2.71    2.39
  -8  -6   4    4.41    2.70
   7   6  -4    3.52    2.25
   7   6  -4   -0.73    2.12
  -7  -6   4   -3.85    2.77
  -7  -6   4   -0.24    1.99
   6   6  -4   -0.74    1.54
   6   6  -4    1.84    2.08
  -6  -6   4   -2.64    2.12
  -6  -6   4    1.40    1.63
   5   6  -4   -1.13    1.56
   5   6  -4    0.70    1.26
  -5  -6   4    0.15    1.26
  -5  -6   4    0.31    1.60
   4   6  -4   -0.56    1.23
   4   6  -4    0.95    0.95
   4   6  -4    0.31    0.44
  -4  -6   4    0.73    1.02
  -4  -6   4    0.77    1.43
   3   6  -4    1.84    0.53
   3   6  -4    2.10    1.42
   3   6  -4    1.20    0.83
  -3  -6   4    1.42    0.97
  -3  -6   4    0.13    1.37
   2   6  -4   -0.31    1.09
   2   6  -4    0.16    0.38
   2   6  -4   -0.11    0.54
  -2  -6   4    0.01    1.29
  -2  -6   4    0.53    0.78
   1   6  -4    6.95    1.44
   1   6  -4    9.96    1.06
  -1  -6   4    8.33    1.62
  -1  -6   4    7.93    1.24
   0   6  -4   -0.23    0.94
   0   6  -4   -0.07    0.38
   0  -6   4   -0.35    0.98
   0  -6   4   -0.21    0.65
  -1   6  -4    1.05    0.47
  -1   6  -4    0.96    0.90
   1  -6   4    1.08    1.06
   1  -6   4    0.64    0.73
  -2   6  -4    3.13    0.65
  -2   6  -4    4.03    0.99
   2  -6   4    4.65    1.00
   2  -6   4    3.61    1.14
  -3   6  -4    5.51    0.84
  -3   6  -4    5.75    0.96
   3  -6   4    5.41    1.09
   3  -6   4    5.95    1.34
  -4   6  -4    3.62    0.76
  -4   6  -4    3.97    0.83
   4  -6   4    5.70    1.29
   4  -6   4    3.95    0.78
   4  -6   4    4.04    1.43
  -5   6  -4    3.39    0.83
   5  -6   4    3.45    0.90
   5  -6   4    4.71    1.29
   5  -6   4    5.04    1.56
  -6   6  -4    6.74    1.10
   6  -6   4    8.11    2.40
   6  -6   4    6.57    1.23
  -7   6  -4    4.16    1.39
  -7   6  -4    0.34    0.76
   7  -6   4    1.73    1.15
   7  -6   4    1.49    2.19
  -8   6  -4   -0.22    1.60
   8  -6   4   -0.54    1.31
   8  -6   4    1.05    2.77
  -9   6  -4   -0.10    2.03
   9  -6   4   -1.02    3.24
   9   5  -4    6.25    3.33
  -9  -5   4    6.60    3.18
   8   5  -4    3.78    2.24
   8   5  -4    1.49    2.72
  -8  -5   4    5.26    2.70
  -8  -5   4   -6.93    3.16
   7   5  -4    4.64    2.14
   7   5  -4    0.80    2.26
  -7  -5   4    4.72    2.16
  -7  -5   4    0.50    2.51
   6   5  -4    2.97    1.79
   6   5  -4    3.63    1.87
  -6  -5   4    0.35    1.67
  -6  -5   4    3.06    1.65
   5   5  -4    2.61    1.51
   5   5  -4    2.30    1.34
  -5  -5   4    2.98    1.37
  -5  -5   4    1.54    1.38
   4   5  -4    9.14    0.91
   4   5  -4    6.81    1.36
   4   5  -4    8.57    1.75
  -4  -5   4    8.47    1.44
  -4  -5   4    6.10    1.52
   3   5  -4    7.86    0.85
   3   5  -4    6.10    1.15
   3   5  -4    5.99    1.41
  -3  -5   4    7.49    1.27
  -3  -5   4    4.34    1.38
   2   5  -4    1.11    0.41
   2   5  -4    2.65    1.16
   2   5  -4    1.52    0.68
  -2  -5   4    2.42    1.18
  -2  -5   4    1.43    0.84
   1   5  -4    6.81    0.90
   1   5  -4    5.52    1.20
  -1  -5   4    5.70    1.04
  -1  -5   4    5.75    1.38
   0   5  -4    0.35    0.38
   0   5  -4    0.15    0.79
   0  -5   4    0.08    0.86
   0  -5   4    0.13    0.60
  -1   5  -4    4.64    0.70
  -1   5  -4    4.42    0.93
   1  -5   4    4.80    1.10
   1  -5   4    4.48    0.87
  -2   5  -4    0.81    0.64
  -2   5  -4    0.22    0.38
   2  -5   4    0.15    0.82
   2  -5   4    0.43    0.63
  -3   5  -4   11.92    1.10
  -3   5  -4   11.98    1.22
   3  -5   4   11.62    1.51
   3  -5   4   11.05    1.77
   3  -5   4   11.12    1.06
  -4   5  -4    1.15    0.50
  -4   5  -4    1.47    0.55
   4  -5   4    1.02    0.64
   4  -5   4    1.07    0.83
   4  -5   4    0.97    0.99
  -5   5  -4   -0.21    0.46
  -5   5  -4    0.23    0.43
   5  -5   4   -0.32    0.75
   5  -5   4    0.60    1.18
   5  -5   4    0.08    0.66
  -6   5  -4    3.78    0.96
  -6   5  -4    1.29    0.63
   6  -5   4    2.34    1.50
   6  -5   4    2.34    0.98
  -7   5  -4    0.43    0.58
  -7   5  -4    1.57    1.03
   7  -5   4   -0.49    0.90
   7  -5   4    1.51    2.20
  -8   5  -4    5.95    1.91
   8  -5   4    5.84    2.89
   8  -5   4    2.49    1.80
  -9   5  -4   -3.44    1.83
   9  -5   4    1.96    3.26
   9  -5   4   -1.09    2.12
 -10   5  -4   -2.68    2.41
  10  -5   4   -4.31    3.51
  10  -5   4   -1.40    2.94
   9   4  -4    3.16    3.18
   9   4  -4    4.20    1.84
  -9  -4   4    0.51    2.94
   8   4  -4    5.31    1.97
   8   4  -4    3.85    2.80
  -8  -4   4    4.00    2.69
   7   4  -4    1.76    1.63
   7   4  -4    1.92    2.08
  -7  -4   4    3.39    2.11
  -7  -4   4   -0.70    2.18
   6   4  -4    1.22    1.50
   6   4  -4    0.64    1.52
  -6  -4   4    1.11    1.49
  -6  -4   4    0.22    1.39
   5   4  -4   15.69    2.66
   5   4  -4   13.98    2.04
  -5  -4   4    9.87    1.71
  -5  -4   4   12.49    1.77
   4   4  -4    0.28    0.92
   4   4  -4    0.82    1.21
   4   4  -4    0.36    0.30
  -4  -4   4    0.89    0.95
  -4  -4   4    0.60    0.93
   3   4  -4    5.09    1.26
   3   4  -4    5.36    0.67
   3   4  -4    4.72    1.12
  -3  -4   4    3.88    1.16
  -3  -4   4    5.06    1.12
   2   4  -4    4.70    0.89
   2   4  -4    4.45    1.14
  -2  -4   4    5.72    0.72
  -2  -4   4    5.04    0.98
  -2  -4   4    5.97    1.22
   1   4  -4    1.21    0.83
   1   4  -4    0.50    0.48
  -1  -4   4    0.43    0.32
  -1  -4   4    0.77    0.85
  -1  -4   4    0.26    0.58
   0   4  -4   37.33    1.98
   0  -4   4   35.13    1.42
   0  -4   4   34.59    1.85
   0  -4   4   35.89    2.11
  -1   4  -4    0.01    0.49
   1  -4   4    0.05    0.46
   1  -4   4    0.14    0.67
   1  -4   4    0.00    0.29
  -2   4  -4    8.53    1.00
  -2   4  -4    7.36    0.84
   2  -4   4    6.83    1.08
   2  -4   4    8.23    1.14
  -3   4  -4   14.21    1.10
  -3   4  -4   13.21    1.04
   3  -4   4   13.72    1.66
   3  -4   4   11.72    1.35
   3  -4   4   12.42    1.11
  -4   4  -4    4.54    0.66
  -4   4  -4    4.31    0.67
   4  -4   4    4.60    0.87
   4  -4   4    5.52    1.06
   4  -4   4    4.29    1.15
  -5   4  -4    3.47    0.61
  -5   4  -4    4.29    0.65
   5  -4   4    4.51    1.02
   5  -4   4    4.74    1.07
   5  -4   4    3.77    1.29
  -6   4  -4    0.76    0.48
  -6   4  -4    1.87    0.74
  -6   4  -4    2.56    0.60
   6  -4   4    1.67    0.93
   6  -4   4    0.86    1.27
  -7   4  -4    1.93    1.01
  -7   4  -4    1.01    0.52
   7  -4   4    1.45    1.24
   7  -4   4    3.46    1.99
  -8   4  -4    1.06    1.44
   8  -4   4   -1.78    2.22
   8  -4   4    1.83    1.79
  -9   4  -4   -1.31    1.87
   9  -4   4    0.60    2.44
   9  -4   4   -2.91    3.04
  10  -4   4   -3.60    3.52
  10  -4   4   -1.92    2.88
   9   3  -4    1.78    2.99
  -9  -3   4   -5.96    3.41
  -9  -3   4   -3.63    3.35
   8   3  -4    1.74    1.55
   8   3  -4    2.31    2.76
  -8  -3   4   -2.62    2.41
  -8  -3   4    1.17    2.84
   7   3  -4   -0.97    1.20
   7   3  -4    1.76    2.06
  -7  -3   4   -0.40    1.99
  -7  -3   4   -0.33    1.69
   6   3  -4    2.59    1.59
   6   3  -4    0.66    1.20
  -6  -3   4   -0.34    1.08
  -6  -3   4    1.13    1.46
   5   3  -4    6.52    1.60
   5   3  -4    6.45    1.47
  -5  -3   4    8.14    1.51
  -5  -3   4    6.26    1.27
   4   3  -4   14.91    2.17
   4   3  -4   17.20    2.35
  -4  -3   4   16.99    1.84
  -4  -3   4   16.22    1.93
   3   3  -4    2.22    1.05
   3   3  -4    2.06    0.92
  -3  -3   4    3.14    0.93
  -3  -3   4    2.60    0.40
  -3  -3   4    1.92    0.86
   2   3  -4    5.59    0.92
   2   3  -4    6.26    1.05
  -2  -3   4    6.00    1.01
  -2  -3   4    5.52    0.95
  -2  -3   4    7.03    0.68
   1   3  -4    3.87    0.67
   1   3  -4    2.94    0.79
  -1  -3   4    3.44    0.76
  -1  -3   4    3.47    0.46
  -1  -3   4    4.70    0.93
   0   3  -4    1.04    0.44
   0   3  -4    1.39    0.57
   0  -3   4    0.86    0.32
   0  -3   4    0.74    0.49
   0  -3   4    0.74    0.63
  -1   3  -4   10.80    1.00
   1  -3   4    9.04    0.79
   1  -3   4    8.74    1.21
   1  -3   4    8.63    1.03
  -2   3  -4   26.03    1.27
   2  -3   4   26.12    1.23
   2  -3   4   26.83    1.67
   2  -3   4   24.75    1.11
   2  -3   4   24.98    1.43
  -3   3  -4    4.66    0.69
  -3   3  -4    4.51    0.60
   3  -3   4    5.28    0.91
   3  -3   4    4.66    0.81
   3  -3   4    4.83    0.95
  -4   3  -4   13.14    0.94
  -4   3  -4   12.09    0.97
   4  -3   4   11.59    1.36
   4  -3   4   14.49    1.76
   4  -3   4   12.96    1.42
  -5   3  -4    1.22    0.41
   5  -3   4    1.10    0.71
   5  -3   4    1.89    0.80
   5  -3   4    1.27    0.97
   5  -3   4    1.14    0.41
  -6   3  -4    1.72    0.47
  -6   3  -4    3.07    0.79
   6  -3   4    2.77    1.10
   6  -3   4    2.24    0.52
   6  -3   4    2.83    1.30
  -7   3  -4    1.66    0.51
  -7   3  -4    1.54    0.95
   7  -3   4    1.57    1.37
   7  -3   4    1.91    1.77
  -8   3  -4   -1.78    1.08
   8  -3   4   -0.17    2.27
   8  -3   4    1.24    1.60
  -9   3  -4   -0.78    1.86
   9  -3   4    1.22    2.56
   9  -3   4    1.11    3.07
  10  -3   4    0.22    3.02
  10  -3   4   -2.26    3.49
   9   2  -4    3.33    3.15
  -9  -2   4   -5.32    3.16
  -9  -2   4   -2.78    3.25
   8   2  -4    0.81    2.32
   8   2  -4    2.59    1.36
  -8  -2   4   -0.22    2.37
  -8  -2   4    3.14    2.78
   7   2  -4    1.73    1.10
   7   2  -4    2.25    1.99
  -7  -2   4    1.98    1.62
  -7  -2   4    2.50    2.02
   6   2  -4    5.11    1.36
   6   2  -4    4.01    1.72
  -6  -2   4    7.01    1.72
  -6  -2   4    3.71    1.30
   5   2  -4    0.62    1.10
   5   2  -4    1.15    1.04
  -5  -2   4    0.69    0.74
  -5  -2   4    1.14    1.02
   4   2  -4   -0.17    0.91
   4   2  -4   -0.06    0.91
  -4  -2   4    1.01    0.83
  -4  -2   4   -0.16    0.58
  -4  -2   4    0.32    0.23
   3   2  -4    0.87    0.79
   3   2  -4    0.23    0.76
  -3  -2   4    0.34    0.53
  -3  -2   4    0.24    0.22
  -3  -2   4    0.21    0.67
   2   2  -4   -0.05    0.61
   2   2  -4    0.54    0.66
  -2  -2   4    0.58    0.53
  -2  -2   4    0.15    0.22
  -2  -2   4    0.62    0.58
   1   2  -4   69.71    2.29
   1   2  -4   66.96    2.28
  -1  -2   4   69.55    1.72
  -1  -2   4   71.57    2.29
  -1  -2   4   73.19    2.35
   0   2  -4  109.31    2.62
   0   2  -4  105.32    2.67
   0  -2   4  105.02    2.30
   0  -2   4  109.95    2.72
   0  -2   4  105.20    2.78
  -1   2  -4    7.87    0.75
  -1   2  -4    7.88    0.81
   1  -2   4    6.85    0.85
   1  -2   4    7.82    0.95
   1  -2   4    7.55    0.66
  -2   2  -4    5.96    0.67
   2  -2   4    6.96    0.80
   2  -2   4    6.82    0.71
   2  -2   4    6.92    0.99
   2  -2   4    7.23    0.88
   3  -2   4   14.11    1.16
   3  -2   4   14.63    1.18
   3  -2   4   13.48    1.36
   3  -2   4   13.25    0.80
   3  -2   4   13.20    0.93
  -4   2  -4    8.22    0.76
   4  -2   4    8.80    1.16
   4  -2   4    9.86    1.48
   4  -2   4    9.20    1.33
   4  -2   4    9.37    0.79
  -5   2  -4    0.26    0.28
   5  -2   4    0.51    0.39
   5  -2   4    0.08    0.82
   5  -2   4    0.78    0.80
  -6   2  -4    1.25    0.39
  -6   2  -4    1.32    0.56
   6  -2   4    2.19    1.09
   6  -2   4    1.68    0.53
   6  -2   4    2.07    1.22
  -7   2  -4    4.76    1.13
  -7   2  -4    2.48    0.53
   7  -2   4    4.35    1.59
   7  -2   4    4.12    0.83
   7  -2   4    5.39    1.97
  -8   2  -4    0.43    1.20
   8  -2   4    0.01    2.06
   8  -2   4    0.25    1.78
  -9   2  -4   -2.52    1.69
   9  -2   4   -1.74    2.84
   9  -2   4    0.49    2.30
   9   1  -4    3.03    3.02
  -9  -1   4    2.29    3.39
  -9  -1   4    1.49    2.92
   8   1  -4    2.85    1.55
   8   1  -4    2.49    2.59
  -8  -1   4    2.92    2.18
  -8  -1   4    3.91    2.88
   7   1  -4    1.90    2.03
   7   1  -4    1.06    0.92
  -7  -1   4    2.17    1.44
  -7  -1   4    1.49    1.92
   6   1  -4    2.12    1.03
   6   1  -4    2.23    1.61
  -6  -1   4    1.85    1.00
  -6  -1   4    2.29    1.29
   5   1  -4    4.85    1.13
   5   1  -4    5.74    1.59
  -5  -1   4    6.11    1.08
  -5  -1   4    5.95    1.19
   4   1  -4    0.82    0.82
   4   1  -4    0.37    0.93
  -4  -1   4    1.24    0.57
  -4  -1   4    1.16    0.81
  -4  -1   4    1.06    0.26
   3   1  -4    1.55    0.75
   3   1  -4    1.40    0.82
  -3  -1   4    1.28    0.68
  -3  -1   4    1.49    0.29
  -3  -1   4    1.85    0.53
   2   1  -4   24.22    1.53
   2   1  -4   25.29    1.75
  -2  -1   4   25.47    1.54
  -2  -1   4   24.82    0.94
  -2  -1   4   24.48    1.28
   1   1  -4    6.15    0.87
   1   1  -4    4.92    0.83
  -1  -1   4    5.33    0.54
  -1  -1   4    4.67    0.70
  -1  -1   4    5.86    0.82
   0   1  -4    2.02    0.64
   0   1  -4    1.93    0.44
   0  -1   4    1.54    0.49
   0  -1   4    1.80    0.47
   0  -1   4    1.82    0.33
  -1   1  -4    2.23    0.42
  -1   1  -4    1.94    0.43
   1  -1   4    2.77    0.48
   1  -1   4    1.82    0.45
   1  -1   4    1.54    0.33
   2  -1   4    8.99    0.94
   2  -1   4    8.67    0.68
   2  -1   4    8.70    0.83
   2  -1   4    8.80    0.87
   2  -1   4    7.75    0.63
   3  -1   4   18.38    1.33
   3  -1   4   19.65    0.97
   3  -1   4   19.41    1.32
   3  -1   4   17.67    0.91
   3  -1   4   20.88    1.21
   4  -1   4   19.93    1.07
   4  -1   4   19.08    1.64
   4  -1   4   19.46    1.62
   4  -1   4   18.81    1.03
   4  -1   4   19.18    1.34
  -5   1  -4    3.13    0.61
  -5   1  -4    3.81    0.51
   5  -1   4    3.18    0.56
   5  -1   4    3.15    1.04
   5  -1   4    2.42    0.93
  -6   1  -4    0.70    0.50
  -6   1  -4    0.46    0.29
   6  -1   4    0.53    0.47
   6  -1   4    0.68    0.96
   6  -1   4   -0.02    1.06
  -7   1  -4    4.20    1.00
   7  -1   4    2.49    1.56
   7  -1   4    4.34    1.66
   7  -1   4    3.26    0.66
  -8   1  -4    0.42    1.02
   8  -1   4   -0.54    1.60
   8  -1   4   -0.48    2.05
  -9   1  -4    1.12    1.89
   9  -1   4    4.12    2.72
  10  -1   4   -0.16    2.95
   9   0  -4    3.47    3.23
  -9   0   4    0.99    2.37
  -9   0   4   -2.15    3.26
   8   0  -4    1.37    2.54
  -8   0   4   -0.81    2.51
  -8   0   4    0.65    1.71
   7   0  -4    4.50    2.13
   7   0  -4    4.23    1.02
  -7   0   4    4.46    2.03
  -7   0   4    6.89    1.67
   6   0  -4   13.62    1.82
   6   0  -4    9.00    1.92
  -6   0   4   11.15    1.68
  -6   0   4   11.09    1.80
   5   0  -4   22.55    1.89
   5   0  -4   21.16    2.62
  -5   0   4   23.51    2.09
  -5   0   4   21.25    0.76
  -5   0   4   22.56    1.70
   4   0  -4    4.14    0.90
   4   0  -4    3.62    1.17
  -4   0   4    3.89    0.46
  -4   0   4    4.37    0.80
  -4   0   4    3.50    0.89
   3   0  -4    4.04    1.02
   3   0  -4    4.20    0.77
  -3   0   4    5.01    0.85
  -3   0   4    5.06    0.49
  -3   0   4    4.86    0.70
   2   0  -4    5.53    0.74
   2   0  -4    4.66    0.92
  -2   0   4    5.91    0.62
  -2   0   4    7.26    1.05
  -2   0   4    5.40    0.51
   1   0  -4   32.09    1.34
   1   0  -4   31.18    1.85
  -1   0   4   31.08    1.44
  -1   0   4   32.09    1.04
  -1   0   4   31.16    1.04
   0   0  -4   19.79    1.35
   0   0  -4   18.88    0.96
   0   0   4   18.79    0.82
   0   0   4   18.77    1.09
  -1   0  -4    5.45    0.74
   1   0   4    3.24    0.50
   1   0   4    4.10    0.51
   1   0   4    3.97    0.53
   1   0   4    4.35    0.55
   2   0   4    6.07    0.86
   2   0   4    5.65    0.58
   2   0   4    5.35    0.75
   2   0   4    5.37    0.66
   2   0   4    5.85    0.55
   3   0   4    5.62    0.94
   3   0   4    4.22    0.60
   3   0   4    5.26    0.59
   3   0   4    6.62    1.00
   3   0   4    5.13    0.62
   4   0   4    1.67    0.37
   4   0   4    1.86    0.77
   4   0   4    1.78    0.70
   4   0   4    1.67    0.44
  -5   0  -4    2.96    0.57
   5   0   4    2.70    0.58
   5   0   4    2.63    0.87
   5   0   4    5.68    1.20
  -6   0  -4   34.18    1.20
  -6   0  -4   35.30    1.75
   6   0   4   36.34    1.70
   6   0   4   36.60    2.92
   6   0   4   32.60    2.71
  -7   0  -4   -0.23    0.56
   7   0   4    0.04    1.14
   7   0   4   -0.10    0.47
   7   0   4   -1.02    1.31
  -8   0  -4    1.84    0.88
  -8   0  -4   -0.26    0.95
   8   0   4   -1.20    1.72
   8   0   4   -0.01    0.51
  -9   0  -4   -2.61    1.50
   9   0   4    0.95    2.41
 -10   0  -4    7.68    2.07
  10   0   4   -2.78    3.07
 -10   1   4   -7.90    3.69
   9  -1  -4    1.46    2.76
  -9   1   4    0.40    1.98
  -9   1   4   -3.17    3.28
   8  -1  -4    0.97    2.33
  -8   1   4    1.71    1.37
  -8   1   4   -1.28    2.41
   7  -1  -4    0.28    1.63
   7  -1  -4    0.52    0.74
  -7   1   4    0.54    1.66
  -7   1   4    2.97    1.21
   6  -1  -4    0.39    0.67
   6  -1  -4    0.34    1.21
  -6   1   4    0.74    0.62
  -6   1   4   -0.54    0.99
   5  -1  -4   -0.13    0.66
   5  -1  -4    0.32    1.07
  -5   1   4    0.18    0.46
  -5   1   4    0.31    0.24
  -5   1   4    1.28    0.82
   4  -1  -4    5.11    1.29
   4  -1  -4    6.37    1.06
   4  -1  -4    5.55    0.91
  -4   1   4    6.95    0.61
  -4   1   4    6.02    0.99
   3  -1  -4   22.37    1.42
   3  -1  -4   21.98    1.95
   3  -1  -4   21.94    1.36
  -3   1   4   22.51    0.91
  -3   1   4   22.39    1.49
   2  -1  -4   86.33    3.10
   2  -1  -4   83.14    2.16
   2  -1  -4   79.25    2.19
  -2   1   4   84.68    1.82
  -2   1   4   77.97    2.27
   1  -1  -4    2.41    0.36
   1  -1  -4    2.74    0.45
   1  -1  -4    2.49    0.81
  -1   1   4    2.46    0.37
  -1   1   4    2.68    0.55
   0  -1  -4    2.91    0.43
   0  -1  -4    3.30    0.68
   0   1   4    2.78    0.51
   0   1   4    2.43    0.36
  -1  -1  -4    1.25    0.41
  -1  -1  -4    0.93    0.30
  -1  -1  -4    1.08    0.24
   1   1   4    0.68    0.30
   1   1   4    0.72    0.26
   1   1   4    1.06    0.31
   2   1   4    0.82    0.41
   2   1   4    0.70    0.30
   2   1   4    0.83    0.47
   2   1   4    0.52    0.25
   2   1   4    0.73    0.32
   3   1   4   17.32    1.30
   3   1   4   16.48    1.32
   3   1   4   15.51    0.93
   3   1   4   15.99    0.79
   3   1   4   16.21    0.94
  -4  -1  -4    0.27    0.24
   4   1   4   -0.32    0.52
   4   1   4   -0.07    0.55
   4   1   4    0.16    0.24
   4   1   4    0.03    0.34
  -5  -1  -4    1.52    0.46
   5   1   4    1.94    0.84
   5   1   4    2.00    0.93
   5   1   4    1.37    0.58
   5   1   4    1.47    0.36
  -6  -1  -4    1.44    0.29
  -6  -1  -4    1.71    0.56
  -6  -1  -4    1.78    0.68
   6   1   4    0.85    0.97
   6   1   4    2.53    0.70
  -7  -1  -4    0.65    0.70
  -7  -1  -4    0.27    0.58
   7   1   4    0.30    1.18
   7   1   4    0.23    0.55
  -8  -1  -4   -0.56    0.81
  -8  -1  -4    1.24    1.10
   8   1   4    0.08    1.79
   8   1   4   -0.05    0.59
  -9  -1  -4    2.31    1.68
   9   1   4    4.51    2.62
 -10  -1  -4   14.30    2.95
 -10  -1  -4    3.51    2.77
  10   1   4   10.16    3.62
  10  -2  -4   -0.46    2.76
 -10   2   4   12.87    2.47
   9  -2  -4    6.14    2.70
  -9   2   4   -6.65    3.14
   8  -2  -4    4.17    2.49
  -8   2   4    0.00    2.39
  -8   2   4    4.87    1.42
   7  -2  -4    0.00    1.56
  -7   2   4   -0.73    1.53
  -7   2   4    2.23    0.85
   6  -2  -4    4.72    1.62
   6  -2  -4    3.50    1.37
   6  -2  -4    5.43    0.92
  -6   2   4    5.62    1.36
   5  -2  -4   13.41    1.96
   5  -2  -4   10.36    1.80
   5  -2  -4   12.99    1.34
  -5   2   4   13.14    0.85
  -5   2   4   14.89    1.76
   4  -2  -4   -0.06    0.56
   4  -2  -4    0.24    0.87
   4  -2  -4    0.21    0.67
  -4   2   4    0.78    0.60
  -4   2   4    0.28    0.30
   3  -2  -4    0.64    0.52
   3  -2  -4    0.99    0.47
   3  -2  -4   -0.14    0.67
  -3   2   4    0.40    0.28
  -3   2   4    0.63    0.49
   2  -2  -4  108.15    3.59
   2  -2  -4  105.43    2.30
   2  -2  -4  102.90    2.66
  -2   2   4  102.05    2.57
  -2   2   4  107.43    2.17
   1  -2  -4   53.53    2.35
   1  -2  -4   52.83    1.42
   1  -2  -4   51.89    1.46
  -1   2   4   50.61    1.39
  -1   2   4   51.17    1.58
   0  -2  -4    9.75    1.19
   0  -2  -4    7.05    0.60
   0   2   4    8.25    0.66
   0   2   4    8.85    0.76
   0   2   4    9.17    0.67
   0   2   4    9.43    0.61
  -1  -2  -4   39.54    1.19
  -1  -2  -4   36.31    1.55
   1   2   4   36.10    0.96
   1   2   4   37.47    1.16
   1   2   4   37.73    1.19
  -2  -2  -4   60.55    1.76
   2   2   4   59.49    1.32
   2   2   4   62.13    1.73
   2   2   4   60.78    1.49
   2   2   4   63.60    2.20
  -3  -2  -4    1.03    0.25
  -3  -2  -4    0.99    0.40
   3   2   4    1.19    0.27
   3   2   4    1.35    0.43
   3   2   4    1.37    0.60
  -4  -2  -4    0.84    0.47
  -4  -2  -4    1.24    0.33
   4   2   4    0.76    0.43
   4   2   4    1.95    0.73
   4   2   4    1.19    0.27
  -5  -2  -4   13.12    1.38
  -5  -2  -4   14.44    1.01
   5   2   4   14.39    1.92
   5   2   4   14.03    1.22
   5   2   4   14.35    0.77
  -6  -2  -4    4.33    0.97
  -6  -2  -4    4.35    0.76
  -6  -2  -4    4.90    0.42
   6   2   4    4.97    0.86
   6   2   4    5.08    1.34
  -7  -2  -4    3.69    1.16
  -7  -2  -4    2.41    0.82
   7   2   4    4.20    0.89
   7   2   4    2.93    1.43
  -8  -2  -4    3.87    1.62
  -8  -2  -4    2.76    1.07
   8   2   4    2.56    2.01
   8   2   4    3.67    0.99
  -9  -2  -4   -0.07    1.82
  -9  -2  -4   -1.46    1.21
   9   2   4   -1.83    2.52
   9   2   4    0.68    0.84
 -10  -2  -4    1.19    2.35
   9  -3  -4    3.60    2.96
  -9   3   4   -3.24    3.09
   8  -3  -4    1.93    2.34
  -8   3   4   -2.63    2.31
   7  -3  -4    0.30    1.74
   7  -3  -4    0.54    1.77
  -7   3   4    0.92    1.58
   6  -3  -4    1.83    1.21
   6  -3  -4    0.14    1.29
  -6   3   4    0.35    0.91
   5  -3  -4    5.03    0.74
   5  -3  -4    3.75    1.38
   5  -3  -4    3.71    1.14
  -5   3   4    3.89    0.92
  -5   3   4    3.31    0.53
   4  -3  -4    8.72    1.02
   4  -3  -4    6.61    1.37
   4  -3  -4    7.36    1.15
  -4   3   4    9.16    1.29
  -4   3   4    8.54    0.85
   3  -3  -4    0.10    0.50
   3  -3  -4   -0.07    0.74
   3  -3  -4    0.65    0.39
  -3   3   4    0.47    0.33
  -3   3   4    0.31    0.41
   2  -3  -4   10.40    0.67
   2  -3  -4   10.76    1.54
   2  -3  -4   12.27    1.03
  -2   3   4   11.24    0.79
  -2   3   4   11.83    0.91
   1  -3  -4   42.17    1.18
   1  -3  -4   45.38    1.57
   1  -3  -4   43.05    2.22
  -1   3   4   42.92    1.33
  -1   3   4   41.89    1.32
   0  -3  -4   -0.01    0.40
   0  -3  -4    0.38    0.54
   0   3   4    0.67    0.28
   0   3   4    0.14    0.24
   0   3   4    0.12    0.28
  -1  -3  -4  100.48    2.81
  -1  -3  -4   97.73    2.41
   1   3   4   99.66    2.08
   1   3   4   98.25    2.17
  -2  -3  -4    2.80    0.55
   2   3   4    1.91    0.45
   2   3   4    1.81    0.53
   2   3   4    1.78    0.34
  -3  -3  -4    7.68    0.49
  -3  -3  -4    7.88    0.92
   3   3   4    7.14    0.84
   3   3   4    8.19    0.61
   3   3   4    7.22    1.17
  -4  -3  -4    1.47    0.36
  -4  -3  -4    2.12    0.63
   4   3   4    1.45    0.51
   4   3   4    1.67    0.28
   4   3   4    2.04    0.77
  -5  -3  -4    2.28    0.55
  -5  -3  -4    2.05    0.70
   5   3   4    1.35    0.29
   5   3   4    1.85    0.67
   5   3   4    1.37    0.88
  -6  -3  -4   19.41    1.46
  -6  -3  -4   19.79    1.90
   6   3   4   19.27    2.60
   6   3   4   18.98    1.70
  -7  -3  -4    0.94    0.88
  -7  -3  -4   -0.17    0.67
   7   3   4    0.14    0.74
   7   3   4   -0.19    1.17
  -8  -3  -4   -0.64    0.79
  -8  -3  -4   -0.75    1.46
   8   3   4   -0.37    0.73
   8   3   4    0.36    1.75
  -9  -3  -4    0.72    2.09
  -9  -3  -4   -0.92    1.37
   9   3   4    3.10    2.76
   9   3   4    2.64    1.08
 -10  -3  -4   -3.02    2.66
  10   3   4    0.69    3.19
   9  -4  -4    1.62    3.07
  -9   4   4   -6.68    3.15
   8  -4  -4    0.74    2.28
   8  -4  -4    1.54    2.66
  -8   4   4   -1.83    2.24
   7  -4  -4    2.32    1.94
   7  -4  -4    2.87    2.04
  -7   4   4    2.35    1.68
   6  -4  -4    6.77    1.97
   6  -4  -4    8.36    1.83
  -6   4   4    6.29    0.85
  -6   4   4    7.60    1.42
   5  -4  -4    0.54    0.40
   5  -4  -4   -0.20    1.11
   5  -4  -4   -0.14    0.82
  -5   4   4    0.35    0.66
  -5   4   4    0.04    0.43
   4  -4  -4   -0.18    0.65
   4  -4  -4    0.24    0.91
   4  -4  -4   -0.04    0.35
  -4   4   4    0.04    0.51
  -4   4   4    0.09    0.42
   3  -4  -4   43.91    2.15
   3  -4  -4   43.85    2.73
   3  -4  -4   42.06    1.25
  -3   4   4   43.30    1.54
  -3   4   4   41.27    1.70
   2  -4  -4    0.58    0.48
   2  -4  -4    0.67    0.24
   2  -4  -4    0.36    0.73
  -2   4   4    0.71    0.38
  -2   4   4    0.73    0.36
   1  -4  -4   31.14    1.98
   1  -4  -4   32.05    1.53
  -1   4   4   31.76    0.91
  -1   4   4   32.24    1.24
  -1   4   4   30.72    1.11
   0  -4  -4   53.29    1.93
   0  -4  -4   54.66    2.27
   0   4   4   51.83    1.21
   0   4   4   54.49    1.57
   0   4   4   53.66    1.41
  -1  -4  -4   14.63    1.25
  -1  -4  -4   14.35    1.17
   1   4   4   14.50    0.87
   1   4   4   14.62    0.90
  -2  -4  -4    2.33    0.58
   2   4   4    2.55    0.66
   2   4   4    1.58    0.44
   2   4   4    1.27    0.34
  -3  -4  -4    4.36    0.80
   3   4   4    4.61    0.84
   3   4   4    4.72    0.61
   3   4   4    3.91    0.66
  -4  -4  -4    4.27    0.87
  -4  -4  -4    4.01    0.56
   4   4   4    4.10    0.96
   4   4   4    4.69    0.55
   4   4   4    3.07    0.70
  -5  -4  -4    1.46    0.75
  -5  -4  -4    1.63    0.57
   5   4   4    1.37    0.68
   5   4   4    1.31    0.28
   5   4   4    0.52    0.82
  -6  -4  -4    3.43    0.80
  -6  -4  -4    2.97    0.98
   6   4   4    3.89    0.97
   6   4   4    2.46    1.20
  -7  -4  -4   12.72    2.04
  -7  -4  -4   11.86    1.60
   7   4   4   11.46    2.30
   7   4   4   12.79    1.85
  -8  -4  -4   -0.73    0.86
  -8  -4  -4   -1.46    1.42
   8   4   4    0.21    2.03
   8   4   4    0.38    0.91
  -9  -4  -4   -2.39    2.38
   9   4   4   -0.11    1.07
   9   4   4   -0.51    2.72
 -10  -4  -4    0.05    2.99
  10   4   4   -2.32    2.98
   9  -5  -4    7.47    3.69
   9  -5  -4    9.00    3.48
  -9   5   4    2.93    3.16
   8  -5  -4    1.65    2.92
   8  -5  -4    1.87    2.73
  -8   5   4   -0.20    2.52
   7  -5  -4    1.31    1.94
   7  -5  -4    2.94    2.02
  -7   5   4   -0.62    1.51
   6  -5  -4    0.59    1.48
   6  -5  -4    1.34    1.26
  -6   5   4    1.17    0.52
  -6   5   4    0.74    0.99
   5  -5  -4   39.74    2.91
   5  -5  -4   30.89    3.37
  -5   5   4   35.54    2.18
  -5   5   4   33.41    1.64
   4  -5  -4    8.28    1.60
   4  -5  -4   10.39    1.72
  -4   5   4   10.72    1.18
  -4   5   4   10.56    1.23
   3  -5  -4   72.20    2.93
   3  -5  -4   73.91    3.53
  -3   5   4   69.82    2.29
  -3   5   4   73.18    2.16
   2  -5  -4    9.33    1.23
   2  -5  -4    9.47    0.50
   2  -5  -4   10.50    1.74
  -2   5   4   10.15    0.84
  -2   5   4   10.96    0.98
   1  -5  -4    4.32    0.78
   1  -5  -4    4.81    0.96
  -1   5   4    5.02    0.45
  -1   5   4    5.17    0.63
  -1   5   4    5.42    0.59
   0  -5  -4    0.91    0.60
   0  -5  -4    1.24    0.59
   0   5   4    1.13    0.25
   0   5   4    0.90    0.38
   0   5   4    0.85    0.31
  -1  -5  -4   13.44    1.37
  -1  -5  -4   11.52    1.10
   1   5   4   11.59    0.89
   1   5   4   10.95    0.91
  -2  -5  -4    0.37    0.40
  -2  -5  -4    0.53    0.61
   2   5   4    0.02    0.38
   2   5   4    0.33    0.35
  -3  -5  -4    4.38    0.91
   3   5   4    3.76    0.81
   3   5   4    3.32    0.67
   3   5   4    3.50    0.48
  -4  -5  -4   25.08    1.92
  -4  -5  -4   23.66    1.14
   4   5   4   24.11    2.06
   4   5   4   24.02    1.60
   4   5   4   23.54    1.06
  -5  -5  -4   10.29    1.21
  -5  -5  -4    8.37    1.36
   5   5   4    7.86    0.61
   5   5   4    6.00    1.06
   5   5   4    7.41    1.42
  -6  -5  -4    2.20    0.75
  -6  -5  -4    2.36    1.10
   6   5   4    3.07    0.95
   6   5   4    0.75    1.09
  -7  -5  -4    4.52    1.56
  -7  -5  -4    2.98    0.95
   7   5   4    4.93    1.85
   7   5   4    3.13    1.11
  -8  -5  -4   -0.06    0.88
  -8  -5  -4   -0.23    1.87
   8   5   4    1.48    2.17
   8   5   4    0.78    1.19
  -9  -5  -4   -4.01    2.54
   9   5   4    2.43    2.88
   9   5   4    3.18    1.59
  10   5   4    0.02    1.49
  10   5   4   -2.27    3.20
   9  -6  -4   -1.18    3.54
   9  -6  -4    2.57    2.94
   8  -6  -4   -0.82    2.89
   8  -6  -4    5.73    3.08
  -8   6   4   -1.62    2.38
   7  -6  -4   24.01    3.63
   7  -6  -4   20.56    3.55
  -7   6   4   22.58    3.02
   6  -6  -4    3.28    1.83
   6  -6  -4    5.15    1.76
  -6   6   4    4.86    1.35
  -6   6   4    3.69    0.75
   5  -6  -4   39.17    3.64
   5  -6  -4   39.55    3.07
  -5   6   4   39.72    1.90
  -5   6   4   38.89    2.29
   4  -6  -4    0.99    0.86
   4  -6  -4    0.05    1.01
  -4   6   4    0.60    0.51
  -4   6   4    0.46    0.57
   3  -6  -4    2.73    0.94
   3  -6  -4    2.21    1.13
  -3   6   4    2.73    0.60
  -3   6   4    2.65    0.64
   2  -6  -4    6.77    1.09
   2  -6  -4    6.87    1.24
  -2   6   4    7.75    0.42
  -2   6   4    7.41    1.04
  -2   6   4    7.20    0.78
   1  -6  -4  114.62    3.54
   1  -6  -4  105.22    3.63
  -1   6   4  109.12    2.44
  -1   6   4  108.53    2.70
  -1   6   4  105.84    2.11
   0  -6  -4   -0.05    0.63
   0  -6  -4    0.94    0.62
   0   6   4    0.58    0.33
   0   6   4    0.50    0.45
   0   6   4    0.62    0.24
  -1  -6  -4   74.40    2.72
  -1  -6  -4   73.01    2.92
   1   6   4   75.42    2.15
   1   6   4   75.83    2.10
  -2  -6  -4   74.74    2.95
  -2  -6  -4   75.78    2.72
   2   6   4   74.38    2.33
   2   6   4   74.07    2.03
  -3  -6  -4    5.02    1.06
   3   6   4    4.77    0.82
   3   6   4    4.43    0.60
   3   6   4    4.19    0.92
  -4  -6  -4    0.68    0.83
   4   6   4    0.30    0.77
   4   6   4    0.21    0.38
   4   6   4   -0.56    0.56
  -5  -6  -4    2.36    0.66
  -5  -6  -4    1.81    1.03
   5   6   4    2.03    0.41
   5   6   4    2.65    1.20
   5   6   4    1.81    0.83
  -6  -6  -4    5.98    1.55
  -6  -6  -4    6.53    0.98
   6   6   4    7.32    1.78
   6   6   4    6.26    1.29
  -7  -6  -4    0.68    0.77
  -7  -6  -4    1.42    1.52
   7   6   4    0.33    1.60
   7   6   4    2.27    1.19
  -8  -6  -4   -1.72    2.05
   8   6   4    1.01    2.43
   8   6   4    3.44    1.41
  -9  -6  -4   -3.31    2.78
   9   6   4    2.36    1.63
   9   6   4   -0.43    2.81
 -10  -6  -4   -7.04    3.19
  10   6   4   -1.20    3.10
  10   6   4    0.78    1.63
   9  -7  -4    1.23    3.11
   9  -7  -4   -2.14    3.52
   8  -7  -4    0.18    2.97
   8  -7  -4    3.71    2.73
  -8   7   4   -1.75    2.47
   7  -7  -4    5.00    2.53
   7  -7  -4    1.90    2.27
  -7   7   4   -1.31    1.56
   6  -7  -4    2.00    1.71
   6  -7  -4    0.51    1.62
  -6   7   4    0.76    0.63
  -6   7   4    0.71    1.14
   5  -7  -4    0.61    1.26
   5  -7  -4    1.96    1.23
  -5   7   4    0.47    0.62
  -5   7   4    0.73    0.77
   4  -7  -4    0.63    1.10
   4  -7  -4    0.60    0.90
  -4   7   4    0.39    0.62
  -4   7   4    0.64    0.53
   3  -7  -4   -0.64    0.98
   3  -7  -4   -0.03    0.73
  -3   7   4   -0.13    0.37
  -3   7   4   -0.54    0.54
   2  -7  -4    6.83    1.27
   2  -7  -4    5.52    1.29
  -2   7   4    6.48    0.90
  -2   7   4    7.69    0.85
  -2   7   4    6.90    0.46
   1  -7  -4    0.25    0.86
   1  -7  -4    0.75    0.74
  -1   7   4    0.94    0.30
  -1   7   4    1.22    0.54
  -1   7   4    0.58    0.29
   0  -7  -4    5.37    1.08
   0  -7  -4    4.99    1.09
   0   7   4    6.00    0.80
   0   7   4    5.71    0.77
  -1  -7  -4   30.58    1.91
  -1  -7  -4   29.78    1.05
  -1  -7  -4   32.04    2.25
   1   7   4   30.74    1.48
   1   7   4   31.68    1.54
  -2  -7  -4    2.17    0.99
  -2  -7  -4    2.64    0.67
   2   7   4    2.35    0.63
   2   7   4    2.43    0.58
  -3  -7  -4    2.62    1.11
   3   7   4    2.30    0.58
   3   7   4    3.21    0.97
   3   7   4    2.49    0.75
  -4  -7  -4   29.79    2.61
   4   7   4   29.72    2.50
   4   7   4   26.61    1.96
   4   7   4   27.33    1.37
  -5  -7  -4    2.81    0.66
  -5  -7  -4    2.59    1.25
   5   7   4    2.71    1.24
   5   7   4    1.73    0.87
   5   7   4    1.95    0.48
  -6  -7  -4    0.95    0.65
  -6  -7  -4    0.15    1.29
   6   7   4    0.80    1.00
   6   7   4    2.51    1.61
  -7  -7  -4   -1.00    1.69
   7   7   4   -0.30    1.11
   7   7   4   -2.67    1.74
  -8  -7  -4   -0.80    2.50
   8   7   4    2.08    1.64
   8   7   4    0.02    2.54
  -9  -7  -4   -3.67    3.48
   9   7   4    5.04    1.99
   9   7   4   -0.17    3.26
 -10  -7  -4   -5.76    4.03
  10   7   4   -0.12    3.56
  10   7   4    4.53    2.08
   9  -8  -4   -4.81    3.32
   9  -8  -4    5.05    3.33
   8  -8  -4    8.21    3.21
   8  -8  -4    1.07    3.07
  -8   8   4   -2.31    2.49
   7  -8  -4    3.68    2.46
   7  -8  -4    1.03    2.56
  -7   8   4    0.31    1.92
   6  -8  -4    0.73    1.82
   6  -8  -4    2.23    1.93
  -6   8   4   -0.54    1.20
  -6   8   4    0.49    0.71
   5  -8  -4    0.42    1.19
   5  -8  -4    1.58    1.41
  -5   8   4    0.48    0.74
  -5   8   4    0.83    0.82
   4  -8  -4    3.52    1.26
   4  -8  -4    4.27    1.42
  -4   8   4    3.68    0.84
  -4   8   4    4.19    0.93
   3  -8  -4    2.23    1.07
   3  -8  -4    2.19    1.18
  -3   8   4    1.94    0.57
  -3   8   4    2.01    0.79
   2  -8  -4    2.16    1.02
   2  -8  -4    2.02    1.17
  -2   8   4    1.84    0.71
  -2   8   4    2.04    0.55
  -2   8   4    1.92    0.30
   1  -8  -4    0.29    0.94
   1  -8  -4    0.15    0.83
  -1   8   4    0.00    0.54
  -1   8   4   -0.03    0.30
  -1   8   4   -0.03    0.27
   0  -8  -4    2.02    0.94
   0  -8  -4    2.52    1.14
   0  -8  -4    2.15    0.49
   0   8   4    1.65    0.63
   0   8   4    2.38    0.55
  -1  -8  -4   14.56    0.91
  -1  -8  -4   15.70    2.16
  -1  -8  -4   16.09    1.73
   1   8   4   14.11    1.43
   1   8   4   14.60    1.24
  -2  -8  -4   21.98    2.44
  -2  -8  -4   21.33    1.71
   2   8   4   21.75    1.49
   2   8   4   22.49    1.65
  -3  -8  -4    1.67    1.24
  -3  -8  -4    1.41    0.65
   3   8   4    1.81    0.61
   3   8   4    1.18    0.76
  -4  -8  -4    0.92    1.21
   4   8   4   -0.57    0.70
   4   8   4    0.76    0.55
   4   8   4    0.74    1.00
  -5  -8  -4   42.82    3.69
  -5  -8  -4   40.04    1.69
   5   8   4   42.78    2.68
   5   8   4   39.64    1.56
   5   8   4   42.89    3.29
  -6  -8  -4    8.12    2.23
   6   8   4    8.36    2.23
   6   8   4    9.08    1.66
  -7  -8  -4    8.16    2.82
   7   8   4    8.90    1.91
   7   8   4   11.22    3.00
  -8  -8  -4   -4.10    2.93
   8   8   4    1.92    1.62
   8   8   4    1.77    2.97
  -9  -8  -4   -3.12    4.02
   9   8   4   -3.35    3.26
   9   8   4    1.19    1.94
  -9   9   4   -6.90    2.97
   8  -9  -4    1.30    3.14
   8  -9  -4    6.00    3.11
   7  -9  -4    1.31    2.68
   7  -9  -4    2.60    2.35
  -7   9   4   -0.01    0.80
  -7   9   4   -3.52    2.05
   6  -9  -4    0.35    1.98
   6  -9  -4    1.15    1.69
  -6   9   4    0.80    0.88
  -6   9   4   -0.29    1.29
   5  -9  -4    0.43    1.40
   5  -9  -4    1.17    1.35
  -5   9   4    0.36    0.88
  -5   9   4   -0.34    0.92
   4  -9  -4   -0.64    0.98
   4  -9  -4    0.81    1.13
  -4   9   4   -0.02    0.59
  -4   9   4    0.33    0.81
   3  -9  -4   -0.32    1.10
   3  -9  -4    1.23    1.05
  -3   9   4    1.83    0.63
  -3   9   4    0.89    0.80
   2  -9  -4    0.47    1.09
   2  -9  -4    1.63    1.10
  -2   9   4    1.43    0.34
  -2   9   4    0.90    0.45
  -2   9   4    1.17    0.71
   1  -9  -4    5.05    1.35
   1  -9  -4    4.78    1.34
  -1   9   4    4.82    0.65
  -1   9   4    4.59    0.90
   0  -9  -4    1.28    0.96
   0  -9  -4    0.87    0.48
   0  -9  -4    0.61    1.12
   0   9   4    0.53    0.53
   0   9   4    0.38    0.67
  -1  -9  -4    0.54    0.73
  -1  -9  -4    0.21    0.38
  -1  -9  -4    0.34    1.13
   1   9   4    0.05    0.57
   1   9   4    0.28    0.65
  -2  -9  -4    9.08    0.82
  -2  -9  -4    7.08    1.17
  -2  -9  -4    8.01    1.71
   2   9   4    6.45    0.94
   2   9   4    7.12    1.09
  -3  -9  -4   17.57    1.72
  -3  -9  -4   17.42    2.79
   3   9   4   18.79    1.61
   3   9   4   16.38    1.89
  -4  -9  -4    1.71    1.50
   4   9   4    1.14    0.63
   4   9   4    0.82    1.10
   4   9   4    1.47    0.93
  -5  -9  -4   13.97    2.55
   5   9   4   10.62    1.64
   5   9   4   13.30    2.18
  -6  -9  -4   -1.51    2.04
   6   9   4   -0.12    1.70
   6   9   4    0.50    1.25
  -7  -9  -4   -2.58    2.56
   7   9   4    0.93    1.61
   7   9   4   -0.72    2.31
   8   9   4    0.76    1.94
   8   9   4   -1.81    3.08
  -9  -9  -4   -5.51    4.33
   9   9   4   -1.18    3.54
   9   9   4    5.92    2.27
   8 -10  -4   -0.48    3.43
   8 -10  -4    4.52    2.96
  -8  10   4   -5.14    2.63
   7 -10  -4    1.30    3.12
   7 -10  -4    4.45    2.69
  -7  10   4    1.47    1.18
  -7  10   4   -2.66    2.03
   6 -10  -4    4.07    2.55
   6 -10  -4    3.50    1.80
  -6  10   4    3.67    1.25
  -6  10   4   -0.15    1.66
   5 -10  -4    0.29    1.31
   5 -10  -4    0.23    1.70
  -5  10   4   -0.29    1.02
  -5  10   4   -0.31    0.94
   4 -10  -4    7.38    1.91
   4 -10  -4    7.14    1.65
  -4  10   4    8.04    1.34
  -4  10   4    6.21    1.30
   3 -10  -4    0.23    1.13
   3 -10  -4    0.51    1.03
  -3  10   4    0.23    0.57
  -3  10   4    0.91    0.85
   2 -10  -4    0.59    1.06
   2 -10  -4    1.05    1.11
  -2  10   4    0.59    0.33
  -2  10   4    0.67    0.84
  -2  10   4    0.59    0.45
   1 -10  -4    2.82    1.23
   1 -10  -4    1.74    1.22
  -1  10   4    2.30    0.83
  -1  10   4    2.96    0.60
   0 -10  -4   33.80    3.04
   0 -10  -4   30.01    2.61
   0 -10  -4   30.82    1.66
   0  10   4   32.95    2.13
   0  10   4   33.11    1.75
  -1 -10  -4    5.61    0.76
  -1 -10  -4    4.52    1.23
  -1 -10  -4    4.24    1.56
   1  10   4    4.17    0.96
   1  10   4    4.41    0.92
  -2 -10  -4    2.05    0.51
  -2 -10  -4    1.42    1.30
  -2 -10  -4    2.39    0.94
   2  10   4    1.41    0.88
   2  10   4    1.64    0.83
  -3 -10  -4    0.21    0.38
  -3 -10  -4    0.44    0.60
  -3 -10  -4    0.06    1.39
   3  10   4   -0.76    0.82
   3  10   4   -0.26    0.66
  -4 -10  -4    2.76    1.83
  -4 -10  -4    3.07    0.95
   4  10   4    2.88    0.75
   4  10   4    2.60    1.21
  -5 -10  -4    2.08    1.99
   5  10   4    1.03    1.21
   5  10   4    0.43    1.48
  -6 -10  -4   -1.86    2.57
   6  10   4    0.43    1.98
   6  10   4   -0.40    1.50
  -7 -10  -4   -1.10    3.57
   7  10   4    3.98    1.91
   7  10   4    3.71    2.80
  -8 -10  -4   -4.80    4.05
   8  10   4    1.13    2.06
   8  10   4   -4.58    2.88
  -9 -10  -4   -8.27    4.85
   9  10   4    0.88    3.94
   9  10   4    7.59    2.56
   8 -11  -4    6.64    2.97
   8 -11  -4   -1.22    3.50
   7 -11  -4    6.81    2.47
   7 -11  -4    0.37    3.24
  -7  11   4   -1.31    2.35
  -7  11   4    1.07    1.50
   6 -11  -4    2.43    1.61
   6 -11  -4    2.04    2.73
  -6  11   4   -0.77    1.84
  -6  11   4    0.36    1.34
   5 -11  -4   -0.96    1.99
   5 -11  -4    1.53    1.41
  -5  11   4   -1.10    1.10
  -5  11   4   -0.80    1.28
   4 -11  -4    1.04    1.66
   4 -11  -4    0.17    1.00
  -4  11   4   -0.20    0.93
  -4  11   4    0.77    1.22
   3 -11  -4    7.99    1.99
   3 -11  -4    8.89    1.65
  -3  11   4   10.16    1.46
  -3  11   4    7.88    1.48
   2 -11  -4    6.94    1.90
   2 -11  -4    7.29    1.52
  -2  11   4    6.26    1.28
  -2  11   4    7.92    1.11
   1 -11  -4   -0.03    0.55
   1 -11  -4   -0.26    1.06
   1 -11  -4   -0.54    1.17
  -1  11   4    0.31    0.47
  -1  11   4    0.20    0.88
   0 -11  -4    0.98    1.30
   0 -11  -4    0.44    0.51
   0 -11  -4    0.37    1.08
   0  11   4    0.80    0.89
   0  11   4    0.36    0.60
  -1 -11  -4    1.45    0.56
  -1 -11  -4    1.35    1.10
  -1 -11  -4    1.18    1.54
   1  11   4    1.16    0.79
   1  11   4    1.87    0.99
  -2 -11  -4    2.04    0.97
  -2 -11  -4    2.61    1.59
  -2 -11  -4    1.69    0.54
   2  11   4    1.57    0.96
   2  11   4    2.46    1.06
  -3 -11  -4    1.00    0.79
  -3 -11  -4    0.67    1.82
   3  11   4    1.19    1.07
   3  11   4    1.91    0.86
  -4 -11  -4   12.03    2.74
  -4 -11  -4    7.92    1.40
   4  11   4    9.65    1.78
   4  11   4    7.75    1.05
  -5 -11  -4    3.90    1.06
  -5 -11  -4    2.73    2.63
   5  11   4    1.54    1.62
  -6 -11  -4   -2.70    2.95
   6  11   4    1.01    1.62
   6  11   4    1.10    2.09
  -7 -11  -4   -1.36    3.91
   7  11   4    2.31    2.13
   7  11   4   -1.41    2.63
  -8 -11  -4   -5.24    4.41
   8  11   4    3.16    2.39
   8  11   4   -0.46    3.41
   7 -12  -4    6.85    3.69
  -7  12   4    4.94    2.04
  -7  12   4    0.48    2.39
   6 -12  -4    0.88    3.02
  -6  12   4   -3.26    1.92
  -6  12   4    0.26    1.71
   5 -12  -4   10.74    3.17
   5 -12  -4    5.95    1.70
  -5  12   4    4.21    1.93
  -5  12   4   10.06    2.33
   4 -12  -4    3.51    2.20
   4 -12  -4    2.57    1.22
  -4  12   4    0.54    1.39
  -4  12   4    1.62    1.11
   3 -12  -4    3.62    2.09
   3 -12  -4    3.13    1.18
  -3  12   4    1.75    1.35
  -3  12   4    2.42    1.02
   2 -12  -4    3.86    1.22
   2 -12  -4    5.09    2.01
  -2  12   4    4.59    0.87
  -2  12   4    2.95    1.29
   1 -12  -4   16.66    1.66
   1 -12  -4   16.00    2.47
   1 -12  -4   24.21    3.75
  -1  12   4   16.97    2.37
  -1  12   4   17.63    1.34
   0 -12  -4   15.06    2.46
   0 -12  -4   14.96    1.48
   0 -12  -4   14.07    2.55
   0  12   4   15.61    1.56
   0  12   4   14.67    1.80
  -1 -12  -4    9.69    1.72
  -1 -12  -4   14.98    2.78
  -1 -12  -4   12.67    1.33
   1  12   4   12.77    1.68
   1  12   4   12.44    1.85
  -2 -12  -4    1.70    2.02
  -2 -12  -4    0.39    0.45
  -2 -12  -4    0.04    0.87
   2  12   4    1.72    1.08
   2  12   4    0.97    1.05
  -3 -12  -4    5.79    2.33
  -3 -12  -4    3.95    1.18
   3  12   4    5.22    1.59
   3  12   4    5.39    1.20
  -4 -12  -4   -0.28    2.60
  -4 -12  -4    0.24    0.80
   4  12   4    1.03    1.61
   4  12   4    0.36    0.75
  -5 -12  -4    2.68    3.27
  -5 -12  -4    4.67    1.24
   5  12   4    6.38    2.03
  -6 -12  -4    4.76    4.25
   6  12   4    4.64    2.18
  -7 -12  -4   -3.06    4.65
   7  12   4    1.59    2.34
   7  12   4   -3.18    2.72
  -8 -12  -4   -5.51    4.71
   8  12   4    3.19    2.48
   8  12   4   -3.69    3.24
   7 -13  -4    3.90    3.58
  -7  13   4   -0.04    2.08
  -7  13   4   -0.06    2.60
   6 -13  -4    3.93    3.33
  -6  13   4   -1.05    2.01
  -6  13   4   -1.14    1.99
   5 -13  -4    1.09    3.08
  -5  13   4    0.27    1.98
  -5  13   4    0.91    1.64
   4 -13  -4    7.63    2.96
  -4  13   4    3.88    2.04
  -4  13   4    7.27    1.90
   3 -13  -4    6.15    2.72
  -3  13   4    8.12    1.51
  -3  13   4    4.52    1.92
   2 -13  -4    3.43    2.33
  -2  13   4    3.55    0.78
  -2  13   4    1.88    1.64
   1 -13  -4    0.40    1.98
   1 -13  -4   -0.44    0.56
  -1  13   4   -0.29    1.34
   0 -13  -4    0.81    1.93
   0 -13  -4    0.81    0.64
   0  13   4    1.86    1.50
   0  13   4    1.88    0.80
  -1 -13  -4   -0.14    0.49
  -1 -13  -4    0.55    2.07
   1  13   4    1.10    0.95
   1  13   4   -0.66    1.27
  -2 -13  -4    3.78    2.46
   2  13   4    3.62    1.39
   2  13   4    3.59    1.46
  -3 -13  -4   -0.53    2.63
   3  13   4    2.67    1.61
   3  13   4    1.64    1.19
  -4 -13  -4    2.39    3.21
   4  13   4    1.69    1.76
   4  13   4    0.22    0.86
  -5 -13  -4   -3.61    3.98
   5  13   4    1.50    2.11
  -6 -13  -4   -3.17    4.43
   6  13   4    1.43    2.32
  -7 -13  -4  -10.36    4.80
   7  13   4    2.56    2.31
   6 -14  -4    9.90    3.89
  -6  14   4    6.78    2.58
  -6  14   4    7.33    2.66
   5 -14  -4    0.29    3.19
  -5  14   4   -0.02    2.35
  -5  14   4    0.03    1.71
   4 -14  -4    2.14    3.07
  -4  14   4    1.17    1.45
  -4  14   4    0.94    2.07
   3 -14  -4    1.77    2.90
  -3  14   4    2.96    0.96
  -3  14   4   -0.54    2.02
   2 -14  -4    2.12    2.62
  -2  14   4    0.37    1.78
   1 -14  -4    3.96    2.92
   1 -14  -4    0.78    0.76
  -1  14   4    0.64    1.95
   0 -14  -4   -0.20    0.59
   0 -14  -4    1.02    2.57
   0  14   4   -0.22    1.71
   0  14   4    0.87    0.76
  -1 -14  -4    2.96    3.02
   1  14   4    2.77    1.18
   1  14   4   -0.56    1.56
  -2 -14  -4    5.44    3.11
   2  14   4    3.09    1.83
   2  14   4    4.52    1.59
  -3 -14  -4    4.30    3.83
   3  14   4    1.93    1.55
   3  14   4    2.75    1.91
  -4 -14  -4    1.94    4.02
   4  14   4    3.14    2.14
  -5 -14  -4   -0.26    4.58
   5  14   4    3.07    2.38
  -6 -14  -4   -7.35    5.13
   6  14   4    0.37    2.19
   5 -15  -4    4.98    3.51
  -5  15   4    3.37    1.99
  -5  15   4   -0.27    2.56
   4 -15  -4    3.38    3.37
  -4  15   4   -1.15    2.56
  -4  15   4    3.20    1.67
   3 -15  -4    8.49    3.68
  -3  15   4   12.50    1.79
   2 -15  -4    0.37    3.23
  -2  15   4   -2.17    2.33
   1 -15  -4    1.86    3.23
   1 -15  -4    0.57    0.80
  -1  15   4    0.50    2.20
   0 -15  -4    8.06    3.63
   0  15   4   -0.94    2.18
  -1 -15  -4    5.92    3.36
   1  15   4   -0.68    2.16
   1  15   4    2.48    1.31
  -2 -15  -4   -0.63    4.21
   2  15   4    2.25    1.61
   2  15   4   -0.70    1.91
  -3 -15  -4    1.79    4.14
   3  15   4    0.21    1.83
   3  15   4    4.09    2.04
  -4 -15  -4    0.73    5.24
   4  15   4    4.62    2.38
  -5 -15  -4   -3.28    5.03
   5  15   4    2.36    2.44
  -6 -15  -4   -8.76    5.58
   6  15   4    2.81    2.52
   4 -16  -4    2.90    3.61
  -4  16   4   -3.97    2.55
  -4  16   4    4.89    1.72
   3 -16  -4    4.81    3.83
  -3  16   4   -2.24    2.81
   2 -16  -4    5.93    3.92
  -2  16   4   -1.17    2.77
   1 -16  -4    2.36    3.74
  -1  16   4   -4.40    2.36
   0 -16  -4   10.70    4.31
   0  16   4   -2.17    2.60
  -1 -16  -4    4.03    4.43
   1  16   4    3.45    1.77
   1  16   4    0.15    2.66
  -2 -16  -4    4.67    4.57
   2  16   4    2.71    1.95
   2  16   4    2.85    2.51
  -3 -16  -4    3.24    4.77
   3  16   4   -2.57    2.10
   3  16   4    2.66    2.12
  -4 -16  -4    5.99    5.48
   4  16   4    6.54    2.69
  -5 -16  -4   -8.15    5.51
   5  16   4    3.93    2.64
   3 -17  -4    9.01    4.02
  -3  17   4   -4.14    3.05
   2 -17  -4    7.42    4.10
  -2  17   4   -3.47    2.98
   1 -17  -4    3.51    3.78
  -1  17   4   -5.88    2.89
   0 -17  -4    7.63    4.56
   0  17   4   -0.47    2.69
  -1 -17  -4    9.68    4.47
   1  17   4   -3.64    2.88
  -2 -17  -4    9.76    4.82
   2  17   4    5.90    2.22
  -3 -17  -4   10.79    5.59
   3  17   4   -4.31    2.69
   3  17   4    4.85    2.38
   0 -18  -4   10.78    4.54
  -1 -18  -4    9.84    4.97
  -1 -14   5   15.28    4.46
   0  14  -5    6.29    3.20
   0 -14   5    0.42    2.72
   0 -14   5    9.16    3.71
   1 -14   5    9.88    3.78
   1 -14   5    2.75    2.92
   2 -14   5    0.76    2.80
   2 -14   5    7.67    3.67
   3  13  -5    7.90    3.43
  -3 -13   5    9.99    4.91
  -3 -13   5    3.56    2.52
   2  13  -5    9.90    3.40
  -2 -13   5    2.58    2.46
  -2 -13   5    8.67    4.13
   1  13  -5    8.59    3.20
  -1 -13   5   12.08    4.04
   0  13  -5    3.47    2.96
   0 -13   5    7.57    3.58
   0 -13   5   -0.78    2.43
  -1  13  -5   -2.25    2.42
  -1  13  -5    2.45    2.70
   1 -13   5    5.02    2.92
   1 -13   5    8.37    3.45
   2 -13   5    9.67    3.56
   2 -13   5    1.61    2.62
   3 -13   5    2.02    3.32
   3 -13   5   -2.00    2.79
   4 -13   5    2.59    3.16
   4 -13   5    2.58    3.31
   4  12  -5    4.55    3.32
  -4 -12   5    3.55    2.40
  -4 -12   5    0.76    5.24
   3  12  -5    5.20    3.30
  -3 -12   5    6.21    4.22
  -3 -12   5    6.18    2.51
   2  12  -5    5.71    3.22
  -2 -12   5    3.77    3.25
  -2 -12   5    3.68    2.29
   1  12  -5    3.06    3.19
  -1 -12   5    4.12    3.18
  -1 -12   5    1.83    2.22
   0  12  -5    4.37    2.93
   0 -12   5    5.29    3.09
   0 -12   5    2.28    2.31
  -1  12  -5    1.74    2.42
  -1  12  -5   -4.02    1.91
   1 -12   5    0.38    2.33
   1 -12   5    7.68    3.16
  -2  12  -5   -3.69    2.27
   2 -12   5    5.38    3.11
   2 -12   5    3.27    2.62
   3 -12   5    2.30    3.00
   3 -12   5    1.20    2.62
   4 -12   5   -0.68    2.83
   4 -12   5    7.06    3.40
  -5  12  -5   -2.69    2.62
   5 -12   5    1.53    3.07
   5 -12   5    6.11    3.47
   5  11  -5    6.45    3.36
  -5 -11   5    3.12    2.32
   4  11  -5    4.47    3.26
  -4 -11   5   -0.48    4.36
  -4 -11   5    5.22    2.40
   3  11  -5    3.57    3.06
  -3 -11   5    2.35    2.07
  -3 -11   5    1.59    3.42
   2  11  -5    1.41    2.86
   2  11  -5   -1.60    1.52
  -2 -11   5    2.01    2.10
  -2 -11   5    3.62    2.98
   1  11  -5    7.19    2.92
  -1 -11   5    4.47    2.67
  -1 -11   5    4.07    2.12
   0  11  -5   -1.68    1.63
   0  11  -5    3.66    2.61
   0 -11   5    3.67    2.05
   0 -11   5    5.89    2.63
  -1  11  -5   -0.97    1.77
  -1  11  -5    1.48    2.11
   1 -11   5    3.03    2.09
   1 -11   5    4.14    2.45
  -2  11  -5    6.97    2.17
  -2  11  -5    4.89    2.14
   2 -11   5    7.08    2.47
   2 -11   5    9.71    2.77
  -3  11  -5    2.47    1.97
   3 -11   5    4.77    2.56
   3 -11   5    6.93    2.75
  -4  11  -5   -2.97    1.85
   4 -11   5   -1.60    2.55
   4 -11   5    2.86    2.91
  -5  11  -5   -2.97    2.18
   5 -11   5    3.12    3.16
   5 -11   5   -0.37    2.87
   6 -11   5    1.40    3.22
   6 -11   5   -1.03    2.86
   6  10  -5    6.80    3.34
  -6 -10   5    6.09    2.50
  -6 -10   5  -14.95    6.79
   5  10  -5    2.88    3.12
  -5 -10   5    3.49    2.31
   4  10  -5    2.51    2.95
  -4 -10   5    0.18    3.46
  -4 -10   5    4.38    2.27
   3  10  -5    2.71    2.79
   3  10  -5   -0.44    1.02
  -3 -10   5    5.06    2.15
  -3 -10   5    2.68    2.86
   2  10  -5    2.56    2.66
   2  10  -5   -1.04    1.01
  -2 -10   5    2.63    2.39
  -2 -10   5    1.39    1.74
   1  10  -5    1.28    2.43
   1  10  -5    0.10    1.20
  -1 -10   5    1.55    1.90
  -1 -10   5    2.59    1.62
   0  10  -5    5.64    2.32
   0  10  -5    4.54    1.59
   0 -10   5    7.10    2.24
   0 -10   5    6.36    1.99
  -1  10  -5    1.23    1.87
  -1  10  -5   -0.36    1.35
   1 -10   5   -0.36    1.51
   1 -10   5    2.62    1.90
  -2  10  -5    3.31    1.77
  -2  10  -5    1.48    1.51
   2 -10   5    4.74    2.07
   2 -10   5    5.23    2.09
  -3  10  -5   -0.26    1.44
  -3  10  -5   -1.44    2.55
   3 -10   5   -0.89    1.72
   3 -10   5    1.20    2.04
  -4  10  -5   -1.92    1.55
   4 -10   5    1.12    2.17
   4 -10   5    0.78    2.26
  -5  10  -5    0.54    1.86
   5 -10   5    4.96    2.89
   5 -10   5    2.22    2.53
  -6  10  -5   -3.54    1.84
   6 -10   5   -2.97    2.60
   6 -10   5   -0.75    2.87
   7 -10   5    1.47    3.47
   6   9  -5    2.80    3.12
  -6  -9   5    5.89    2.41
   5   9  -5    4.73    3.04
  -5  -9   5   -0.42    3.45
  -5  -9   5    6.58    2.47
   4   9  -5    1.00    2.57
  -4  -9   5    0.18    2.82
  -4  -9   5    2.93    1.85
   3   9  -5    3.42    0.99
   3   9  -5    5.73    2.65
  -3  -9   5    3.67    2.49
  -3  -9   5    5.81    1.98
   2   9  -5    0.19    0.90
   2   9  -5    3.36    2.27
  -2  -9   5    1.75    1.94
  -2  -9   5    2.66    1.51
   1   9  -5   -0.36    0.95
   1   9  -5    3.63    2.12
  -1  -9   5    0.44    1.69
  -1  -9   5    1.61    1.37
   0   9  -5    0.00    0.89
   0   9  -5    0.20    1.83
   0  -9   5    0.33    1.14
   0  -9   5   -0.64    1.42
  -1   9  -5    2.80    1.24
  -1   9  -5    1.02    1.64
   1  -9   5    3.60    1.52
   1  -9   5    4.31    1.71
  -2   9  -5    0.82    1.43
  -2   9  -5    1.68    1.08
   2  -9   5    3.36    1.63
   2  -9   5    2.87    1.59
  -3   9  -5   -0.15    1.08
  -3   9  -5    0.38    1.23
   3  -9   5    0.45    1.49
   3  -9   5    0.56    1.63
  -4   9  -5    3.77    1.52
   4  -9   5    4.74    2.17
   4  -9   5    2.17    1.92
  -5   9  -5   -0.86    1.37
   5  -9   5   -0.42    1.93
   5  -9   5    2.09    2.27
  -6   9  -5   -2.75    1.35
   6  -9   5    0.52    2.56
   6  -9   5    1.46    2.82
   7  -9   5    1.01    3.36
   8  -9   5   -2.57    3.48
   7   8  -5    6.14    3.04
  -7  -8   5    6.79    2.75
   6   8  -5    4.89    3.01
  -6  -8   5    4.13    2.36
   5   8  -5    2.58    2.64
  -5  -8   5    4.43    2.08
  -5  -8   5   -0.56    2.88
   4   8  -5    2.01    2.11
  -4  -8   5   -0.53    2.02
  -4  -8   5    1.53    1.60
   3   8  -5    4.11    2.23
   3   8  -5   -0.25    0.59
  -3  -8   5    1.56    2.02
  -3  -8   5    1.35    1.35
   2   8  -5   -0.04    0.64
   2   8  -5    1.46    1.79
  -2  -8   5   -0.23    1.13
  -2  -8   5   -0.20    1.67
   1   8  -5    0.29    1.62
   1   8  -5   -0.12    0.62
  -1  -8   5    0.26    1.42
  -1  -8   5    0.21    0.96
   0   8  -5    2.55    0.90
   0   8  -5    2.92    1.60
   0  -8   5    1.18    1.05
   0  -8   5    2.65    1.42
  -1   8  -5   -0.23    0.68
  -1   8  -5    0.74    1.28
   1  -8   5    0.09    1.16
   1  -8   5    0.49    1.02
  -2   8  -5   -0.32    1.20
  -2   8  -5    0.02    0.72
   2  -8   5    0.35    0.96
   2  -8   5    1.23    1.32
  -3   8  -5    0.05    1.09
  -3   8  -5   -0.34    0.74
   3  -8   5    0.14    1.20
   3  -8   5    0.06    1.13
  -4   8  -5   -1.00    1.03
  -4   8  -5   -0.94    0.78
   4  -8   5    0.24    1.54
   4  -8   5   -1.27    1.36
  -5   8  -5    0.39    1.09
   5  -8   5    0.95    2.03
   5  -8   5    0.97    1.53
  -6   8  -5   -0.13    1.17
   6  -8   5    1.36    2.35
   6  -8   5    1.02    2.63
  -7   8  -5   -2.82    1.23
   7  -8   5    0.78    2.94
  -8   8  -5   -0.07    1.67
   8  -8   5   -0.15    3.34
   7   7  -5    4.69    2.78
  -7  -7   5    5.93    2.60
   6   7  -5    3.35    2.72
  -6  -7   5   -5.44    2.59
  -6  -7   5    0.50    2.11
   5   7  -5    1.94    2.37
  -5  -7   5   -0.90    2.16
  -5  -7   5    2.39    1.91
   4   7  -5    5.67    2.23
  -4  -7   5    6.27    2.21
  -4  -7   5    7.29    1.85
   3   7  -5    4.17    0.77
   3   7  -5    6.93    2.18
  -3  -7   5    4.61    1.92
  -3  -7   5    6.70    1.62
   2   7  -5   -0.15    0.53
   2   7  -5    1.08    1.49
  -2  -7   5   -0.70    1.41
  -2  -7   5   -0.31    0.89
   1   7  -5   -0.20    0.48
   1   7  -5    0.99    1.42
  -1  -7   5    1.01    0.88
  -1  -7   5    0.48    1.22
   0   7  -5   -0.45    1.22
   0   7  -5   -0.19    0.52
   0  -7   5    0.46    1.17
   0  -7   5    0.12    0.80
  -1   7  -5   -0.28    1.18
  -1   7  -5   -0.13    0.47
   1  -7   5   -0.08    1.08
   1  -7   5   -0.49    0.73
  -2   7  -5    0.08    1.05
  -2   7  -5   -0.14    0.51
   2  -7   5    0.89    1.05
   2  -7   5    0.11    0.80
  -3   7  -5    3.36    1.14
  -3   7  -5    2.84    0.81
   3  -7   5    2.89    1.30
   3  -7   5    4.14    1.24
  -4   7  -5   -0.35    0.62
  -4   7  -5   -1.41    0.81
   4  -7   5   -0.95    1.21
   4  -7   5    0.67    1.14
  -5   7  -5    1.60    0.97
   5  -7   5    1.27    1.29
   5  -7   5    2.25    1.71
  -6   7  -5    0.08    0.98
   6  -7   5    1.65    1.80
   6  -7   5    0.40    2.23
  -7   7  -5   -0.47    1.04
   7  -7   5    1.46    2.77
  -8   7  -5   -2.09    1.04
  -8   7  -5    3.97    1.80
   8  -7   5    1.25    3.25
  -9   7  -5    3.65    2.11
   9  -7   5    1.26    3.62
   8   6  -5    2.07    2.84
   8   6  -5    5.75    2.60
  -8  -6   5    5.27    3.10
   7   6  -5    4.25    2.59
   7   6  -5    1.76    2.38
  -7  -6   5    1.76    2.42
   6   6  -5    4.44    2.37
   6   6  -5    4.04    1.93
  -6  -6   5    0.82    2.40
  -6  -6   5    7.68    2.38
   5   6  -5    1.18    1.28
   5   6  -5    3.26    2.02
  -5  -6   5    0.74    1.73
  -5  -6   5    1.57    1.56
   4   6  -5    4.18    1.20
   4   6  -5    5.28    1.95
   4   6  -5    2.85    0.73
  -4  -6   5    5.23    1.62
  -4  -6   5    3.29    1.74
   3   6  -5    0.84    0.82
   3   6  -5   -0.44    1.36
   3   6  -5    0.34    0.41
  -3  -6   5   -0.60    0.87
  -3  -6   5   -0.04    1.29
   2   6  -5    5.55    0.81
   2   6  -5    6.59    1.72
   2   6  -5    3.95    0.84
  -2  -6   5    5.35    1.58
  -2  -6   5    5.12    1.21
   1   6  -5    0.90    1.22
   1   6  -5   -0.12    0.47
  -1  -6   5   -0.30    1.21
  -1  -6   5    0.19    0.80
   0   6  -5   30.92    2.74
   0   6  -5   30.09    1.77
   0  -6   5   30.35    2.57
   0  -6   5   30.61    2.19
  -1   6  -5    1.96    1.12
  -1   6  -5    1.04    0.55
   1  -6   5    0.79    0.99
   1  -6   5    1.52    0.81
  -2   6  -5    5.32    0.87
  -2   6  -5    5.29    1.16
   2  -6   5    5.13    1.29
   2  -6   5    4.44    1.03
  -3   6  -5    2.48    0.90
  -3   6  -5    3.10    0.73
   3  -6   5    2.83    1.03
   3  -6   5    2.80    1.16
  -4   6  -5   -0.83    0.64
  -4   6  -5    0.09    0.57
   4  -6   5    1.47    1.16
   4  -6   5    0.38    0.92
  -5   6  -5   11.85    1.63
  -5   6  -5    8.19    1.08
   5  -6   5   10.36    1.76
   5  -6   5   12.43    2.28
  -6   6  -5   -0.61    0.68
   6  -6   5   -0.65    1.71
   6  -6   5   -0.70    1.35
  -7   6  -5    2.82    0.93
   7  -6   5    4.16    2.62
  -8   6  -5    3.08    1.70
   8  -6   5    4.16    3.08
  -9   6  -5    0.68    1.97
   9  -6   5   -2.29    3.42
   8   5  -5    8.34    2.57
   8   5  -5    4.29    3.09
  -8  -5   5    7.68    3.13
   7   5  -5    0.09    2.16
   7   5  -5    2.08    2.18
  -7  -5   5    2.41    2.53
   6   5  -5    3.14    2.03
   6   5  -5   -0.01    1.62
  -6  -5   5    2.89    1.93
  -6  -5   5   -1.15    1.61
   5   5  -5    7.93    2.13
   5   5  -5    4.51    1.56
  -5  -5   5    6.56    1.86
  -5  -5   5    4.02    1.68
   4   5  -5    1.31    1.03
   4   5  -5    0.12    1.50
   4   5  -5    1.09    0.40
  -4  -5   5    0.72    1.25
  -4  -5   5    1.35    1.14
   3   5  -5    0.11    0.34
   3   5  -5    0.24    0.78
   3   5  -5    1.54    1.33
  -3  -5   5    0.42    0.89
  -3  -5   5    0.85    1.25
   2   5  -5    1.40    1.24
   2   5  -5    0.37    0.40
  -2  -5   5    1.54    1.26
  -2  -5   5    0.76    0.82
   1   5  -5    0.00    0.98
   1   5  -5   -0.55    0.28
   1   5  -5    0.17    0.46
  -1  -5   5   -0.49    0.68
  -1  -5   5    0.54    1.08
   0   5  -5    0.61    0.96
   0  -5   5   -0.27    0.64
   0  -5   5    0.69    0.95
  -1   5  -5    6.92    1.15
  -1   5  -5    5.29    0.74
   1  -5   5    6.17    1.25
   1  -5   5    5.71    1.04
  -2   5  -5   10.23    1.48
  -2   5  -5    8.83    1.06
   2  -5   5   10.05    1.47
   2  -5   5   10.76    1.77
  -3   5  -5   21.78    1.47
  -3   5  -5   21.94    1.63
   3  -5   5   23.00    2.14
   3  -5   5   20.08    1.86
  -4   5  -5   -0.27    0.41
  -4   5  -5    0.19    0.59
   4  -5   5   -0.19    0.53
   4  -5   5   -0.44    0.93
   4  -5   5    0.48    0.79
  -5   5  -5   14.69    1.46
  -5   5  -5   12.89    1.40
   5  -5   5   16.63    2.19
   5  -5   5   18.85    2.74
   5  -5   5   13.28    1.64
  -6   5  -5    0.64    0.57
   6  -5   5    1.79    1.62
   6  -5   5   -1.55    1.09
   6  -5   5    0.41    0.78
  -7   5  -5    5.94    1.39
   7  -5   5    6.71    2.55
  -8   5  -5    2.24    1.54
   8  -5   5    0.58    1.56
   8  -5   5    2.04    2.96
  -9   5  -5    4.62    2.15
   9  -5   5    0.83    3.45
   9  -5   5    3.67    2.53
   8   4  -5    3.19    1.98
   8   4  -5    1.63    2.80
  -8  -4   5    3.73    2.87
  -8  -4   5   -4.99    3.08
   7   4  -5    0.93    1.78
   7   4  -5    0.61    2.13
  -7  -4   5    4.60    2.43
  -7  -4   5   -1.86    2.17
   6   4  -5    1.67    1.76
   6   4  -5    1.92    1.78
  -6  -4   5    2.57    1.82
  -6  -4   5   -0.47    1.34
   5   4  -5    0.91    1.48
   5   4  -5    0.69    1.23
  -5  -4   5   -1.05    0.96
  -5  -4   5   -0.01    1.21
   4   4  -5    2.13    1.39
   4   4  -5    2.35    1.13
   4   4  -5    2.77    0.50
  -4  -4   5    3.10    1.13
  -4  -4   5    2.48    1.23
   3   4  -5    1.39    0.96
   3   4  -5    1.73    1.27
  -3  -4   5    1.77    0.45
  -3  -4   5    1.12    0.96
  -3  -4   5    2.61    1.14
   2   4  -5    1.73    0.82
   2   4  -5    2.52    1.14
  -2  -4   5    2.36    0.49
  -2  -4   5    2.36    0.93
  -2  -4   5    3.58    1.17
   1   4  -5    4.56    1.13
   1   4  -5    4.28    0.75
  -1  -4   5    4.52    1.22
  -1  -4   5    4.87    1.01
  -1  -4   5    3.50    0.56
   0   4  -5    1.32    0.81
   0  -4   5    0.28    0.63
   0  -4   5    0.37    0.37
   0  -4   5    0.54    0.75
  -1   4  -5    0.30    0.59
   1  -4   5    0.69    0.41
   1  -4   5    0.20    0.73
   1  -4   5    0.10    0.55
  -2   4  -5    0.55    0.53
   2  -4   5    0.25    0.63
   2  -4   5    0.66    0.74
   2  -4   5    0.48    0.42
  -3   4  -5   -0.21    0.33
  -3   4  -5    0.41    0.50
   3  -4   5   -0.62    0.74
   3  -4   5    0.18    0.47
   3  -4   5    0.21    0.62
  -4   4  -5    0.23    0.49
  -4   4  -5    0.18    0.40
   4  -4   5    0.24    0.77
   4  -4   5    0.18    0.59
   4  -4   5   -0.48    0.75
  -5   4  -5    0.77    0.46
  -5   4  -5    0.48    0.52
   5  -4   5    0.70    0.79
   5  -4   5    0.95    0.77
   5  -4   5    0.47    1.05
  -6   4  -5    3.36    0.70
  -6   4  -5    4.32    0.79
   6  -4   5    3.31    1.09
   6  -4   5    6.14    1.85
   6  -4   5    4.16    1.35
  -7   4  -5    3.90    0.80
  -7   4  -5    8.06    1.56
   7  -4   5    5.00    1.50
   7  -4   5    5.86    2.26
  -8   4  -5   -0.05    1.32
   8  -4   5    1.00    1.85
   8  -4   5    1.24    2.68
  -9   4  -5   -1.30    1.85
   9  -4   5   -0.44    3.16
   9  -4   5   -1.04    2.44
 -10   4  -5   -3.41    2.25
  10  -4   5   -2.90    3.44
  10  -4   5   -1.30    2.91
   9   3  -5    1.16    2.98
  -9  -3   5    2.10    3.24
   8   3  -5   -0.42    2.78
   8   3  -5    4.83    1.83
  -8  -3   5    4.47    2.92
   7   3  -5    0.72    2.17
   7   3  -5    1.73    1.50
  -7  -3   5   -1.04    1.64
  -7  -3   5    0.13    2.15
   6   3  -5   -0.15    1.33
   6   3  -5    0.63    1.56
  -6  -3   5   -1.24    1.09
  -6  -3   5    1.62    1.62
   5   3  -5    8.03    1.79
   5   3  -5    7.73    1.69
  -5  -3   5    5.77    1.40
  -5  -3   5    9.45    1.68
   4   3  -5    1.94    1.17
   4   3  -5    2.07    1.28
  -4  -3   5    2.07    0.40
  -4  -3   5    3.29    1.16
  -4  -3   5    2.75    1.01
   3   3  -5   25.37    2.36
   3   3  -5   26.35    2.27
  -3  -3   5   25.18    1.13
  -3  -3   5   26.07    2.14
  -3  -3   5   27.41    2.16
   2   3  -5   11.27    1.59
   2   3  -5    9.06    1.31
  -2  -3   5   13.07    1.74
  -2  -3   5   12.34    0.89
  -2  -3   5    8.70    1.23
   1   3  -5    0.81    0.62
   1   3  -5    0.35    0.71
  -1  -3   5    0.55    0.61
  -1  -3   5    0.30    0.30
  -1  -3   5    0.40    0.78
   0   3  -5    1.63    0.66
   0   3  -5    1.67    0.58
   0  -3   5    1.28    0.38
   0  -3   5    1.29    0.61
   0  -3   5    1.19    0.69
  -1   3  -5    0.72    0.51
   1  -3   5    0.50    0.57
   1  -3   5    0.34    0.50
   1  -3   5    0.38    0.32
  -2   3  -5   16.83    1.01
  -2   3  -5   17.80    1.24
   2  -3   5   17.41    1.41
   2  -3   5   18.39    1.48
   2  -3   5   18.33    1.14
  -3   3  -5    0.97    0.45
   3  -3   5    0.74    0.46
   3  -3   5    1.18    0.62
   3  -3   5    1.34    0.72
   3  -3   5    1.78    0.56
  -4   3  -5    7.15    0.91
  -4   3  -5    8.67    1.01
   4  -3   5    7.41    1.14
   4  -3   5    9.37    1.37
   4  -3   5   10.27    1.71
  -5   3  -5    0.90    0.46
  -5   3  -5    0.77    0.40
   5  -3   5    0.57    0.71
   5  -3   5    1.35    0.78
   5  -3   5    0.08    0.96
  -6   3  -5    2.24    0.53
  -6   3  -5    3.29    0.83
   6  -3   5    2.22    1.03
   6  -3   5    1.97    1.26
   6  -3   5    2.55    0.55
  -7   3  -5   -0.43    0.37
  -7   3  -5    0.57    0.83
   7  -3   5   -0.88    1.71
   7  -3   5    0.12    1.18
  -8   3  -5    1.45    1.34
   8  -3   5    1.69    2.54
   8  -3   5    0.65    1.72
  -9   3  -5   -3.47    1.77
   9  -3   5   -1.38    2.51
   9  -3   5   -1.55    2.90
  10  -3   5    1.55    3.08
  10  -3   5   -5.80    3.45
   9   2  -5    2.19    3.04
  -9  -2   5   -3.64    3.35
   8   2  -5    1.98    2.84
   8   2  -5    5.29    1.64
  -8  -2   5    4.72    3.11
  -8  -2   5   -1.07    2.38
   7   2  -5    4.77    1.53
   7   2  -5    4.83    2.47
  -7  -2   5    1.53    2.33
  -7  -2   5    0.97    1.53
   6   2  -5    6.00    2.15
   6   2  -5    6.16    1.51
  -6  -2   5    4.94    1.44
  -6  -2   5    8.02    2.06
   5   2  -5    9.84    1.89
   5   2  -5    9.83    1.66
  -5  -2   5    7.67    1.28
  -5  -2   5   11.74    1.76
   4   2  -5    0.73    1.07
   4   2  -5    0.40    1.01
  -4  -2   5    0.33    0.67
  -4  -2   5    0.24    0.27
  -4  -2   5   -0.27    0.84
   3   2  -5    0.87    0.89
   3   2  -5   -0.03    0.85
  -3  -2   5    0.28    0.63
  -3  -2   5    0.08    0.25
  -3  -2   5   -0.17    0.74
   2   2  -5    4.43    0.98
   2   2  -5    3.76    0.97
  -2  -2   5    4.76    0.91
  -2  -2   5    5.04    0.63
  -2  -2   5    2.78    0.83
   1   2  -5   43.20    2.00
   1   2  -5   46.25    2.12
  -1  -2   5   48.07    1.99
  -1  -2   5   47.29    2.09
  -1  -2   5   46.78    1.49
   0   2  -5    7.52    1.01
   0   2  -5    5.45    0.84
   0  -2   5    5.00    0.81
   0  -2   5    5.76    0.67
   0  -2   5    5.18    0.73
  -1   2  -5  112.34    2.88
  -1   2  -5  111.87    2.80
   1  -2   5  109.88    2.97
   1  -2   5  117.36    2.90
   1  -2   5  117.06    2.65
  -2   2  -5    6.91    0.78
  -2   2  -5    7.38    0.82
   2  -2   5    7.13    0.76
   2  -2   5    7.14    0.96
   2  -2   5    7.37    1.02
  -3   2  -5    1.04    0.41
   3  -2   5    1.88    0.58
   3  -2   5    1.66    0.59
   3  -2   5    2.74    0.79
   3  -2   5    1.68    0.44
   4  -2   5    7.39    1.05
   4  -2   5   10.71    1.07
   4  -2   5   10.33    0.91
   4  -2   5    9.95    1.48
   4  -2   5   10.19    1.40
  -5   2  -5    1.15    0.41
   5  -2   5    1.51    0.85
   5  -2   5    1.37    0.51
   5  -2   5    1.40    0.76
   5  -2   5    1.20    0.88
  -6   2  -5    3.44    0.57
  -6   2  -5    4.02    0.81
   6  -2   5    4.63    1.49
   6  -2   5    3.71    0.64
   6  -2   5    4.33    1.27
  -7   2  -5    0.86    0.42
  -7   2  -5    1.04    0.84
   7  -2   5    0.80    0.51
   7  -2   5    1.65    1.73
   7  -2   5    1.19    1.34
  -8   2  -5    2.84    1.39
   8  -2   5    1.54    1.81
   8  -2   5    1.89    2.47
  -9   2  -5   -2.93    1.59
   9  -2   5    1.13    2.62
   9  -2   5    1.27    2.96
   9   1  -5    1.35    3.11
  -9  -1   5   -1.91    3.45
  -9  -1   5   -3.07    2.88
   8   1  -5    4.01    2.94
  -8  -1   5   -3.29    1.95
  -8  -1   5    1.27    2.98
   7   1  -5    3.41    2.28
   7   1  -5    5.39    1.39
  -7  -1   5    4.20    2.25
  -7  -1   5    2.86    1.52
   6   1  -5   -0.60    1.49
   6   1  -5    1.36    1.07
  -6  -1   5    0.52    0.83
  -6  -1   5    1.66    1.37
   5   1  -5   -0.04    1.19
   5   1  -5   -0.14    0.96
  -5  -1   5    0.56    0.66
  -5  -1   5   -0.06    0.92
   4   1  -5   25.85    2.24
   4   1  -5   22.49    2.53
  -4  -1   5   23.88    2.09
  -4  -1   5   24.24    0.98
  -4  -1   5   24.54    1.75
   3   1  -5   46.82    2.79
   3   1  -5   47.79    2.40
  -3  -1   5   45.85    1.37
  -3  -1   5   46.74    2.02
  -3  -1   5   44.20    2.29
   2   1  -5   14.78    1.52
   2   1  -5   14.49    1.66
  -2  -1   5   14.07    1.16
  -2  -1   5   14.19    1.43
  -2  -1   5   13.35    0.83
   1   1  -5   14.95    1.57
   1   1  -5   14.36    1.25
  -1  -1   5   14.25    1.29
  -1  -1   5   13.96    1.12
  -1  -1   5   14.50    0.86
   0   1  -5    0.82    0.62
   0   1  -5    0.55    0.39
   0  -1   5    0.25    0.26
   0  -1   5    0.42    0.38
   0  -1   5    0.33    0.44
  -1   1  -5    3.77    0.62
  -1   1  -5    3.54    0.55
   1  -1   5    4.04    0.65
   1  -1   5    3.35    0.60
   1  -1   5    4.46    0.60
  -2   1  -5   -0.28    0.29
  -2   1  -5    0.09    0.30
   2  -1   5    0.15    0.29
   2  -1   5    0.23    0.38
   2  -1   5    0.21    0.37
   3  -1   5    9.54    0.80
   3  -1   5   11.09    0.84
   3  -1   5    9.76    1.01
   3  -1   5   10.34    1.14
   3  -1   5   11.50    1.15
   4  -1   5    0.76    0.65
   4  -1   5    0.90    0.66
   4  -1   5    1.42    0.56
   4  -1   5    1.17    0.43
   4  -1   5    1.00    0.43
   5  -1   5    0.32    0.68
   5  -1   5   -0.35    0.68
   5  -1   5    0.06    0.42
   5  -1   5   -0.05    0.84
  -6   1  -5    0.44    0.31
  -6   1  -5    0.50    0.46
   6  -1   5    0.74    0.96
   6  -1   5    0.46    1.08
   6  -1   5    0.21    0.41
  -7   1  -5    0.26    0.59
  -7   1  -5   -0.22    0.29
   7  -1   5   -0.59    0.41
   7  -1   5   -0.21    1.48
   7  -1   5   -0.46    1.25
  -8   1  -5   -0.50    0.91
   8  -1   5   -0.71    1.77
   8  -1   5   -0.02    2.01
   9  -1   5    2.73    2.64
   9   0  -5   -0.21    2.97
  -9   0   5   -2.19    2.40
  -9   0   5   -4.79    3.31
   8   0  -5   -0.62    2.55
  -8   0   5    0.05    1.94
  -8   0   5    0.30    2.87
   7   0  -5    2.01    1.02
   7   0  -5    0.99    1.91
  -7   0   5    3.26    2.18
  -7   0   5    2.52    1.36
   6   0  -5    3.24    1.07
   6   0  -5    3.77    1.80
  -6   0   5    3.49    1.07
  -6   0   5    5.31    1.58
   5   0  -5    0.46    0.85
   5   0  -5    0.07    1.16
  -5   0   5    0.13    0.23
  -5   0   5   -0.23    0.48
  -5   0   5   -0.47    0.83
   4   0  -5    1.24    1.12
   4   0  -5    1.09    0.81
  -4   0   5    1.78    0.86
  -4   0   5    2.22    0.36
  -4   0   5    1.82    0.57
   3   0  -5   -0.49    0.76
   3   0  -5    0.64    0.67
  -3   0   5    0.05    0.23
  -3   0   5   -0.15    0.34
  -3   0   5   -0.68    0.58
   2   0  -5    0.59    0.81
   2   0  -5    0.89    0.55
  -2   0   5    0.50    0.26
  -2   0   5    0.75    0.35
  -2   0   5    0.44    0.56
   1   0  -5    0.01    0.69
   1   0  -5    0.40    0.39
  -1   0   5    0.69    0.33
  -1   0   5    0.51    0.25
  -1   0   5    0.28    0.46
   0   0  -5   43.33    1.54
   0   0  -5   43.84    1.99
   0   0   5   43.64    1.65
   0   0   5   42.25    1.35
  -1   0  -5   21.87    1.29
  -1   0  -5   22.16    1.10
   1   0   5   21.85    0.99
   1   0   5   22.95    1.14
   1   0   5   22.64    0.85
  -2   0  -5    1.22    0.43
   2   0   5    1.26    0.35
   2   0   5    1.28    0.32
   2   0   5    1.27    0.41
   2   0   5    1.21    0.44
   3   0   5    3.35    0.55
   3   0   5    4.13    0.77
   3   0   5    4.32    0.79
   3   0   5    3.08    0.51
   3   0   5    3.28    0.46
   4   0   5   20.50    1.15
   4   0   5   23.93    1.81
   4   0   5   22.92    1.13
   4   0   5   23.44    1.41
   4   0   5   21.34    1.76
  -5   0  -5    5.76    0.78
   5   0   5    6.54    0.85
   5   0   5    6.87    1.29
   5   0   5    6.07    1.22
   5   0   5    5.39    0.73
  -6   0  -5    0.64    0.48
  -6   0  -5    0.53    0.28
   6   0   5    1.09    1.07
   6   0   5    0.32    1.14
   6   0   5    0.75    0.49
  -7   0  -5    2.67    0.81
   7   0   5    3.18    0.72
   7   0   5    4.44    1.76
   7   0   5    4.69    1.64
  -8   0  -5   -1.29    0.80
   8   0   5   -1.73    1.66
   8   0   5   -0.20    0.52
  -9   0  -5   -2.61    1.30
   9   0   5   -2.90    2.46
 -10   0  -5   -4.88    2.12
  10   0   5   -0.68    3.00
   9  -1  -5    1.14    3.06
  -9   1   5   -6.62    3.27
  -9   1   5    1.92    2.30
   8  -1  -5    1.57    2.77
  -8   1   5    5.33    1.82
  -8   1   5    3.32    2.96
   7  -1  -5    0.74    1.99
  -7   1   5    0.20    0.78
  -7   1   5   -0.58    1.80
   6  -1  -5    0.73    0.80
   6  -1  -5    1.63    1.53
  -6   1   5    0.60    0.63
  -6   1   5    0.92    1.24
   5  -1  -5    3.63    0.96
   5  -1  -5    2.17    1.29
  -5   1   5    3.25    0.79
  -5   1   5    4.08    0.58
  -5   1   5    3.59    1.08
   4  -1  -5    0.22    0.99
   4  -1  -5    0.77    0.73
  -4   1   5    0.57    0.29
  -4   1   5    0.28    0.44
  -4   1   5    0.76    0.73
   3  -1  -5    2.65    0.71
   3  -1  -5    2.70    0.99
  -3   1   5    3.16    0.44
  -3   1   5    3.55    0.58
  -3   1   5    2.74    0.75
   2  -1  -5    0.41    0.42
   2  -1  -5   -0.02    0.73
  -2   1   5    0.15    0.48
  -2   1   5    0.09    0.24
  -2   1   5    0.18    0.23
   1  -1  -5    2.59    0.48
   1  -1  -5    2.70    0.83
  -1   1   5    2.87    0.41
  -1   1   5    2.37    0.57
   0  -1  -5    1.72    0.41
   0  -1  -5    1.94    0.70
   0   1   5    1.16    0.45
   0   1   5    1.34    0.32
  -1  -1  -5   10.12    0.49
  -1  -1  -5   11.60    1.09
   1   1   5   11.38    0.76
   1   1   5   10.32    0.81
   1   1   5   10.49    0.74
  -2  -1  -5   41.82    1.72
   2   1   5   41.21    1.32
   2   1   5   41.10    1.40
   2   1   5   41.46    1.46
   2   1   5   41.40    1.33
   3   1   5    8.15    1.03
   3   1   5    9.42    1.14
   3   1   5    8.41    0.82
   3   1   5    8.20    0.72
   3   1   5    8.33    0.78
   4   1   5    0.23    0.28
   4   1   5    0.52    0.42
   4   1   5    0.45    0.62
   4   1   5    0.48    0.42
   4   1   5    0.78    0.67
  -5  -1  -5    3.18    0.56
   5   1   5    2.67    0.65
   5   1   5    1.45    0.89
   5   1   5    1.69    0.44
   5   1   5    3.18    1.06
  -6  -1  -5    0.79    0.63
  -6  -1  -5    1.19    0.50
   6   1   5    1.59    1.13
   6   1   5    1.59    0.63
  -7  -1  -5    0.64    0.74
  -7  -1  -5    0.02    0.51
   7   1   5    0.28    1.34
   7   1   5   -0.14    0.55
  -8  -1  -5    7.46    1.81
  -8  -1  -5    5.58    1.25
   8   1   5    5.44    1.04
   8   1   5    5.59    2.23
  -9  -1  -5    5.95    1.81
  -9  -1  -5   10.01    2.49
   9   1   5    8.54    3.18
 -10  -1  -5    6.37    2.24
  10   1   5    4.99    3.26
   9  -2  -5    0.38    3.15
  -9   2   5    4.80    1.87
  -9   2   5   -4.06    3.33
   8  -2  -5    2.09    2.75
  -8   2   5    0.89    2.80
  -8   2   5    4.54    1.45
   7  -2  -5    1.42    2.11
  -7   2   5   -0.80    1.82
  -7   2   5    2.30    0.75
   6  -2  -5    0.29    0.66
   6  -2  -5    0.30    1.38
  -6   2   5    0.11    1.09
   5  -2  -5   20.28    2.86
   5  -2  -5   21.85    1.74
   5  -2  -5   21.25    2.14
  -5   2   5   22.78    2.10
  -5   2   5   19.85    1.03
   4  -2  -5    0.42    0.68
   4  -2  -5   -1.03    0.87
   4  -2  -5    0.04    0.61
  -4   2   5    0.02    0.31
  -4   2   5    0.34    0.65
   3  -2  -5    2.32    0.67
   3  -2  -5    2.73    1.06
   3  -2  -5    3.28    0.68
  -3   2   5    2.95    0.75
  -3   2   5    2.48    0.43
   2  -2  -5   16.62    1.05
   2  -2  -5   16.57    1.87
   2  -2  -5   16.28    1.06
  -2   2   5   17.09    1.24
  -2   2   5   17.26    0.92
   1  -2  -5    6.67    1.06
   1  -2  -5    7.24    0.68
   1  -2  -5    7.18    0.60
  -1   2   5    6.96    0.69
  -1   2   5    6.58    0.89
   0  -2  -5  143.06    3.81
   0   2   5  138.78    2.75
   0   2   5  139.05    2.84
   0   2   5  141.08    2.67
  -1  -2  -5   45.11    1.92
  -1  -2  -5   45.97    1.27
   1   2   5   46.66    1.42
   1   2   5   45.22    1.30
   1   2   5   46.47    1.41
  -2  -2  -5    0.98    0.43
  -2  -2  -5    1.27    0.35
   2   2   5    0.87    0.29
   2   2   5    1.35    0.37
   2   2   5    1.36    0.30
  -3  -2  -5   21.67    1.22
   3   2   5   22.52    1.00
   3   2   5   23.75    1.22
   3   2   5   22.30    1.56
   3   2   5   23.32    0.99
  -4  -2  -5    3.88    0.71
  -4  -2  -5    5.02    0.56
   4   2   5    2.83    0.85
   4   2   5    4.03    0.66
   4   2   5    4.92    0.65
  -5  -2  -5    0.22    0.33
  -5  -2  -5   -0.37    0.41
   5   2   5    0.91    0.81
   5   2   5   -0.05    0.31
   5   2   5    0.13    0.49
  -6  -2  -5    8.41    1.31
  -6  -2  -5    9.47    1.04
   6   2   5    7.74    1.56
   6   2   5    9.88    0.83
   6   2   5   10.20    1.32
  -7  -2  -5   22.88    2.23
  -7  -2  -5   20.88    1.63
   7   2   5   23.83    3.06
   7   2   5   21.86    1.79
  -8  -2  -5    0.48    0.83
  -8  -2  -5    2.49    1.52
   8   2   5    1.94    0.87
   8   2   5    3.56    2.06
  -9  -2  -5    1.27    1.38
  -9  -2  -5    3.79    2.08
   9   2   5    2.92    1.06
   9   2   5   -0.35    2.56
 -10  -2  -5    1.16    2.41
  10   2   5    1.45    3.13
   9  -3  -5    7.83    3.57
  -9   3   5    2.12    3.43
   8  -3  -5    1.06    2.52
  -8   3   5   -0.66    2.68
   7  -3  -5   -0.14    1.75
   7  -3  -5   -0.43    1.72
  -7   3   5   -1.96    1.72
   6  -3  -5    0.95    1.41
   6  -3  -5    0.31    1.18
  -6   3   5    2.66    1.29
   5  -3  -5    0.45    1.20
   5  -3  -5    0.00    0.81
   5  -3  -5   -0.18    0.52
  -5   3   5    0.09    0.73
  -5   3   5    0.07    0.35
   4  -3  -5    0.97    0.60
   4  -3  -5    1.27    0.74
   4  -3  -5    0.60    0.96
  -4   3   5    0.50    0.38
  -4   3   5    0.45    0.63
   3  -3  -5   14.66    1.32
   3  -3  -5   16.36    1.14
   3  -3  -5   14.70    2.13
  -3   3   5   14.21    1.32
  -3   3   5   15.00    0.97
   2  -3  -5   12.19    1.04
   2  -3  -5   11.07    1.77
   2  -3  -5   12.22    0.83
  -2   3   5   11.79    0.84
  -2   3   5   11.90    1.09
   1  -3  -5    2.27    0.39
   1  -3  -5    1.77    0.79
   1  -3  -5    2.18    0.44
  -1   3   5    1.48    0.37
  -1   3   5    2.40    0.48
   0  -3  -5    0.27    0.33
   0  -3  -5    1.10    0.65
   0   3   5    0.70    0.29
   0   3   5    0.54    0.32
   0   3   5    0.82    0.35
  -1  -3  -5   49.09    2.07
  -1  -3  -5   46.61    1.53
   1   3   5   48.54    1.19
   1   3   5   48.03    1.46
   1   3   5   48.69    1.46
  -2  -3  -5   62.27    1.96
  -2  -3  -5   62.83    2.31
   2   3   5   63.75    1.68
   2   3   5   63.51    1.86
  -3  -3  -5   24.43    1.39
   3   3   5   25.41    1.71
   3   3   5   24.48    1.01
   3   3   5   24.39    1.28
  -4  -3  -5  121.78    3.54
  -4  -3  -5  123.16    2.47
   4   3   5  122.49    3.16
   4   3   5  123.83    4.07
   4   3   5  124.20    2.47
  -5  -3  -5    9.24    1.27
  -5  -3  -5    8.38    0.86
   5   3   5    9.45    0.74
   5   3   5    6.06    1.25
   5   3   5    8.45    1.14
  -6  -3  -5   10.76    1.62
  -6  -3  -5    9.63    1.09
   6   3   5    9.76    0.73
   6   3   5   11.58    1.45
   6   3   5    9.81    1.76
  -7  -3  -5    0.24    0.87
  -7  -3  -5    0.47    0.62
   7   3   5    1.74    0.80
   7   3   5    1.11    1.44
  -8  -3  -5    0.90    0.86
  -8  -3  -5    2.03    1.66
   8   3   5    3.21    2.03
   8   3   5    2.05    0.96
  -9  -3  -5   -2.79    1.88
   9   3   5    0.21    0.95
   9   3   5    0.26    2.45
 -10  -3  -5    0.78    2.82
  10   3   5   -1.49    3.03
   8  -4  -5    1.96    2.76
   8  -4  -5    1.44    2.71
  -8   4   5   -0.73    2.71
   7  -4  -5    1.60    1.93
   7  -4  -5    2.61    2.26
  -7   4   5   -0.25    1.82
   6  -4  -5    2.56    1.57
   6  -4  -5    4.04    1.43
  -6   4   5    2.96    0.78
  -6   4   5    3.16    1.27
   5  -4  -5    1.43    1.26
   5  -4  -5    2.45    1.05
   5  -4  -5    2.16    0.62
  -5   4   5    2.54    0.90
  -5   4   5    1.97    0.51
   4  -4  -5   -0.19    0.91
   4  -4  -5    0.12    0.72
   4  -4  -5    0.42    0.51
  -4   4   5    0.49    0.61
  -4   4   5    0.01    0.41
   3  -4  -5    0.00    0.38
   3  -4  -5   -0.21    0.52
   3  -4  -5   -0.27    0.92
  -3   4   5    0.21    0.47
  -3   4   5   -0.04    0.38
   2  -4  -5   45.45    1.39
   2  -4  -5   46.68    2.72
   2  -4  -5   45.86    1.92
  -2   4   5   43.75    1.65
  -2   4   5   43.83    1.55
   1  -4  -5   11.08    1.63
   1  -4  -5   11.94    1.02
  -1   4   5   11.85    0.64
  -1   4   5   11.99    0.88
  -1   4   5   12.27    0.84
   0  -4  -5   22.53    1.23
   0  -4  -5   23.37    1.70
   0   4   5   22.88    0.92
   0   4   5   22.69    1.06
   0   4   5   22.04    0.92
  -1  -4  -5   55.64    2.28
  -1  -4  -5   58.19    2.00
   1   4   5   57.28    1.66
   1   4   5   57.01    1.69
  -2  -4  -5   95.09    2.75
  -2  -4  -5   99.99    3.10
   2   4   5   96.60    2.49
   2   4   5  100.14    2.25
  -3  -4  -5   40.74    1.95
   3   4   5   40.54    2.16
   3   4   5   41.89    1.75
   3   4   5   43.73    1.42
  -4  -4  -5    9.91    1.30
  -4  -4  -5    9.21    0.70
   4   4   5    6.48    1.12
   4   4   5    8.29    1.17
   4   4   5    9.28    0.74
  -5  -4  -5   26.66    1.29
  -5  -4  -5   28.80    2.07
   5   4   5   29.67    1.87
   5   4   5   25.99    2.36
   5   4   5   28.18    1.08
  -6  -4  -5    0.15    0.54
  -6  -4  -5   -0.22    0.73
   6   4   5    0.07    0.95
   6   4   5   -0.37    0.65
  -7  -4  -5    0.87    0.69
  -7  -4  -5    2.09    1.19
   7   4   5    1.20    1.52
   7   4   5    1.02    0.88
  -8  -4  -5    1.56    0.98
  -8  -4  -5    2.73    1.94
   8   4   5    0.54    2.07
   8   4   5    5.08    1.28
  -9  -4  -5   -1.23    2.20
   9   4   5    0.05    1.05
   9   4   5   -1.31    2.53
  10   4   5    0.00    2.93
   9  -5  -5    6.36    3.27
   9  -5  -5   -5.36    3.18
   8  -5  -5    5.40    2.95
   8  -5  -5   -0.90    2.71
  -8   5   5   -0.53    2.65
   7  -5  -5    2.72    2.34
   7  -5  -5    2.23    2.05
  -7   5   5    0.26    1.82
   6  -5  -5    1.19    1.31
   6  -5  -5    0.22    1.50
  -6   5   5   -0.05    1.06
  -6   5   5    0.53    0.44
   5  -5  -5    7.59    1.51
   5  -5  -5    6.49    1.76
  -5   5   5    8.74    1.36
  -5   5   5    7.40    1.06
   4  -5  -5   27.47    2.17
   4  -5  -5   27.59    2.79
   4  -5  -5   28.21    1.19
  -4   5   5   28.07    1.85
  -4   5   5   30.22    1.58
   3  -5  -5   19.91    2.39
   3  -5  -5   21.97    1.01
   3  -5  -5   20.94    1.72
  -3   5   5   20.85    1.32
  -3   5   5   22.68    1.44
   2  -5  -5   -0.50    0.80
   2  -5  -5   -0.07    0.45
   2  -5  -5    0.04    0.20
  -2   5   5    0.36    0.36
  -2   5   5    0.22    0.38
   1  -5  -5   24.17    2.08
   1  -5  -5   22.27    1.45
  -1   5   5   22.03    0.86
  -1   5   5   22.78    1.20
  -1   5   5   20.70    1.01
   0  -5  -5   11.55    1.21
   0  -5  -5   11.05    1.43
   0   5   5   11.20    0.75
   0   5   5   12.93    0.98
   0   5   5   11.19    0.66
  -1  -5  -5    4.45    0.84
  -1  -5  -5    4.70    0.85
   1   5   5    4.02    0.57
   1   5   5    3.89    0.54
  -2  -5  -5    2.95    0.78
  -2  -5  -5    1.34    0.50
   2   5   5    1.99    0.45
   2   5   5    1.99    0.55
  -3  -5  -5   16.42    1.52
   3   5   5   15.42    0.96
   3   5   5   15.01    1.53
   3   5   5   16.37    1.24
  -4  -5  -5    1.80    0.79
   4   5   5    1.21    0.41
   4   5   5    1.41    0.62
   4   5   5    1.15    0.81
  -5  -5  -5    0.41    0.78
  -5  -5  -5    0.90    0.55
   5   5   5    0.52    0.32
   5   5   5   -0.17    0.65
   5   5   5    1.10    1.00
  -6  -5  -5    0.51    0.97
  -6  -5  -5    0.72    0.64
   6   5   5    0.45    1.12
   6   5   5    0.56    0.79
  -7  -5  -5   -0.01    1.17
  -7  -5  -5   -0.09    0.69
   7   5   5   -0.05    1.43
   7   5   5    0.98    0.92
  -8  -5  -5   -1.31    1.80
   8   5   5    0.33    1.08
   8   5   5   -1.53    1.88
  -9  -5  -5    3.58    3.11
   9   5   5    6.76    1.79
   9   5   5    4.15    3.01
 -10  -5  -5   -6.30    2.94
  10   5   5   -4.20    2.77
  10   5   5    0.18    1.51
   9  -6  -5   -2.39    3.39
   9  -6  -5    4.82    3.50
   8  -6  -5   -0.74    2.92
   8  -6  -5    0.34    2.67
  -8   6   5   -5.86    2.43
   7  -6  -5    3.12    2.26
   7  -6  -5    2.21    2.39
  -7   6   5    1.38    2.01
   6  -6  -5   18.16    2.95
   6  -6  -5   18.19    3.07
  -6   6   5   20.11    2.40
  -6   6   5   14.84    1.34
   5  -6  -5    3.72    1.63
   5  -6  -5    4.50    1.31
  -5   6   5    4.77    1.14
  -5   6   5    3.77    0.75
   4  -6  -5    0.73    0.81
   4  -6  -5    0.13    1.06
  -4   6   5    0.06    0.56
  -4   6   5    0.39    0.56
   3  -6  -5    1.92    0.35
   3  -6  -5    1.53    0.81
   3  -6  -5    1.71    1.20
  -3   6   5    2.33    0.65
  -3   6   5    2.21    0.61
   2  -6  -5    0.49    0.62
   2  -6  -5    1.24    1.02
   2  -6  -5    1.16    0.26
  -2   6   5    1.01    0.51
  -2   6   5    1.02    0.41
   1  -6  -5    4.77    0.89
   1  -6  -5    4.94    1.14
  -1   6   5    5.91    0.66
  -1   6   5    5.58    0.53
  -1   6   5    4.41    0.65
   0  -6  -5    5.66    1.12
   0  -6  -5    3.94    0.86
   0   6   5    4.90    0.51
   0   6   5    4.48    0.68
   0   6   5    4.41    0.65
  -1  -6  -5   72.31    2.89
  -1  -6  -5   72.24    2.82
   1   6   5   70.62    2.07
   1   6   5   69.75    2.13
  -2  -6  -5    6.39    1.13
  -2  -6  -5    6.77    1.02
   2   6   5    6.77    0.99
   2   6   5    5.77    0.82
  -3  -6  -5   -0.04    0.71
   3   6   5    0.15    0.68
   3   6   5   -0.08    0.49
   3   6   5    0.09    0.36
  -4  -6  -5    1.27    0.92
   4   6   5    0.44    0.85
   4   6   5    0.02    0.39
   4   6   5   -0.02    0.58
  -5  -6  -5   26.74    2.50
   5   6   5   26.45    1.95
   5   6   5   24.84    2.62
   5   6   5   25.85    1.17
  -6  -6  -5    0.09    0.57
  -6  -6  -5    0.21    1.07
   6   6   5    1.14    1.32
   6   6   5    0.14    0.79
  -7  -6  -5    3.17    1.78
   7   6   5    2.09    1.88
   7   6   5    5.28    1.42
  -8  -6  -5   -0.95    2.18
   8   6   5   -2.19    2.09
   8   6   5    1.05    1.30
  -9  -6  -5   -5.36    2.90
   9   6   5   -0.04    2.87
   9   6   5    0.70    1.55
 -10  -6  -5   -6.54    3.43
  10   6   5   -2.96    3.42
  10   6   5    2.04    1.74
   9  -7  -5    4.00    3.18
   9  -7  -5   -4.87    3.33
   8  -7  -5    0.68    3.11
   8  -7  -5    5.22    3.19
  -8   7   5    0.93    2.97
   7  -7  -5    9.08    3.00
   7  -7  -5   10.89    3.02
  -7   7   5    6.64    2.41
   6  -7  -5    4.53    2.33
   6  -7  -5    6.81    2.12
  -6   7   5    4.24    0.84
  -6   7   5    6.63    1.86
   5  -7  -5    0.71    1.44
   5  -7  -5   -0.11    1.03
  -5   7   5    0.09    0.58
  -5   7   5   -0.31    0.77
   4  -7  -5    7.14    1.69
   4  -7  -5    7.56    1.43
  -4   7   5   10.21    1.43
  -4   7   5    7.52    1.10
   3  -7  -5    0.00    0.70
   3  -7  -5   -0.35    1.06
  -3   7   5    0.53    0.50
  -3   7   5    0.05    0.59
   2  -7  -5    2.17    1.11
   2  -7  -5    0.60    0.77
  -2   7   5    1.39    0.59
  -2   7   5    1.59    0.29
  -2   7   5    1.29    0.46
   1  -7  -5    8.36    1.39
   1  -7  -5    8.02    1.40
  -1   7   5    6.92    0.61
  -1   7   5    5.60    0.78
  -1   7   5    7.41    0.71
   0  -7  -5    5.22    1.06
   0  -7  -5    6.00    1.18
   0   7   5    7.27    1.04
   0   7   5    6.05    0.74
   0   7   5    6.28    0.55
  -1  -7  -5    0.46    0.61
  -1  -7  -5    0.15    0.74
   1   7   5    0.14    0.47
   1   7   5   -0.15    0.38
  -2  -7  -5    2.64    0.75
  -2  -7  -5    3.32    1.06
   2   7   5    3.07    0.61
   2   7   5    3.41    0.72
  -3  -7  -5    1.00    0.98
  -3  -7  -5   -0.64    0.39
   3   7   5   -0.56    0.54
   3   7   5   -0.03    0.46
  -4  -7  -5    7.40    1.43
   4   7   5    6.59    1.07
   4   7   5    8.81    1.04
   4   7   5    8.03    1.41
  -5  -7  -5   10.74    1.82
   5   7   5   11.36    1.01
   5   7   5    9.96    1.73
   5   7   5   12.73    1.73
  -6  -7  -5    0.95    1.36
   6   7   5    1.20    0.99
   6   7   5    0.73    1.38
  -7  -7  -5   -1.21    1.67
   7   7   5   -0.08    1.94
   7   7   5    0.16    1.08
  -8  -7  -5   -3.59    2.44
   8   7   5    2.02    1.48
   8   7   5    0.02    2.70
  -9  -7  -5   -3.66    3.18
   9   7   5   -0.12    3.25
   9   7   5    1.29    1.71
  10   7   5   -4.18    3.39
  10   7   5    0.52    1.81
   9  -8  -5    5.00    3.39
   9  -8  -5   -2.41    3.59
   8  -8  -5    5.63    3.07
   8  -8  -5    1.53    3.20
  -8   8   5   -3.09    2.59
   7  -8  -5    2.90    2.59
   7  -8  -5    1.78    2.56
  -7   8   5   -2.49    1.98
   6  -8  -5    1.87    1.94
   6  -8  -5    4.52    2.15
  -6   8   5    0.72    1.50
  -6   8   5    0.61    0.70
   5  -8  -5    0.87    1.56
   5  -8  -5    0.84    1.19
  -5   8   5    0.32    0.89
  -5   8   5    1.45    0.78
   4  -8  -5   16.24    2.34
   4  -8  -5   15.23    2.37
  -4   8   5   16.64    1.80
  -4   8   5   17.77    1.76
   3  -8  -5   -0.15    1.15
   3  -8  -5    0.26    0.81
  -3   8   5    0.66    0.49
  -3   8   5   -0.01    0.61
   2  -8  -5   10.70    1.73
   2  -8  -5   10.51    1.71
  -2   8   5   10.37    1.03
  -2   8   5   11.44    1.43
  -2   8   5   10.32    0.62
   1  -8  -5   26.41    2.26
   1  -8  -5   29.97    2.64
  -1   8   5   27.81    1.30
  -1   8   5   27.95    1.17
  -1   8   5   28.31    1.74
   0  -8  -5   -0.53    0.82
   0  -8  -5    1.03    0.87
   0   8   5   -0.12    0.22
   0   8   5   -0.14    0.56
   0   8   5   -0.06    0.38
  -1  -8  -5   13.10    1.73
  -1  -8  -5   13.08    2.10
   1   8   5   12.36    1.20
   1   8   5   12.10    1.36
  -2  -8  -5    8.33    1.40
  -2  -8  -5    8.52    1.55
   2   8   5    8.66    1.20
   2   8   5    7.03    0.96
  -3  -8  -5    1.87    1.16
  -3  -8  -5    1.07    0.67
   3   8   5    2.00    0.64
   3   8   5    0.95    0.70
  -4  -8  -5    0.89    1.25
   4   8   5    1.70    0.84
   4   8   5    1.43    0.56
   4   8   5    1.58    1.07
  -5  -8  -5    2.71    1.51
   5   8   5    1.49    1.00
   5   8   5    1.85    0.52
   5   8   5    1.64    1.30
  -6  -8  -5   12.00    2.48
   6   8   5   11.86    2.44
   6   8   5   11.28    1.72
  -7  -8  -5    3.10    2.51
   7   8   5    3.80    2.39
   7   8   5    6.55    1.76
  -8  -8  -5   -3.47    3.02
   8   8   5    0.23    1.66
   8   8   5    0.62    2.72
  -9  -8  -5   -5.55    3.58
   9   8   5    0.58    3.16
   9   8   5    4.92    2.16
   8  -9  -5   -2.08    3.12
   8  -9  -5    2.25    3.02
   7  -9  -5    3.25    2.97
   7  -9  -5    5.43    2.66
  -7   9   5   -2.58    2.21
   6  -9  -5    2.37    2.23
   6  -9  -5    3.43    2.36
  -6   9   5    2.16    0.91
  -6   9   5    0.56    1.68
   5  -9  -5    0.04    1.53
   5  -9  -5    0.10    1.40
  -5   9   5    0.54    0.86
  -5   9   5   -0.85    0.95
   4  -9  -5   -0.26    0.99
   4  -9  -5    0.42    1.28
  -4   9   5    0.50    0.69
  -4   9   5   -0.15    0.77
   3  -9  -5    5.67    1.64
   3  -9  -5    3.48    1.21
  -3   9   5    4.73    0.89
  -3   9   5    5.06    1.03
   2  -9  -5    0.70    0.96
   2  -9  -5   -0.19    1.21
  -2   9   5    0.99    0.46
  -2   9   5    1.88    0.80
  -2   9   5    0.92    0.29
   1  -9  -5    1.29    1.05
   1  -9  -5    2.73    1.31
  -1   9   5    2.01    0.48
  -1   9   5    2.51    0.55
  -1   9   5    2.74    0.83
   0  -9  -5    0.50    0.98
   0  -9  -5   -0.65    0.96
   0   9   5   -0.18    0.44
   0   9   5    0.21    0.65
   0   9   5   -0.14    0.25
  -1  -9  -5    0.08    0.31
  -1  -9  -5   -0.28    1.04
  -1  -9  -5    0.63    0.77
   1   9   5   -0.66    0.57
   1   9   5   -0.01    0.54
  -2  -9  -5    2.03    1.30
  -2  -9  -5    2.01    0.84
   2   9   5    2.69    0.83
   2   9   5    1.97    0.75
  -3  -9  -5    5.48    1.60
  -3  -9  -5    5.01    1.11
   3   9   5    6.44    1.11
   3   9   5    5.86    0.89
  -4  -9  -5   24.21    2.10
  -4  -9  -5   26.15    3.32
   4   9   5   22.81    1.57
   4   9   5   21.03    2.15
  -5  -9  -5    3.83    1.98
   5   9   5    4.40    1.61
   5   9   5    3.67    0.66
   5   9   5    3.97    1.21
  -6  -9  -5    0.02    2.06
   6   9   5    1.79    1.95
   6   9   5    2.99    1.41
  -7  -9  -5   -0.66    2.78
   7   9   5    0.13    1.50
   7   9   5   -0.39    2.36
  -8  -9  -5   -2.17    3.48
   8   9   5   -0.87    3.06
   8   9   5    1.73    1.91
  -9  -9  -5   -6.81    3.76
   9   9   5    3.31    2.18
   9   9   5   -2.34    3.10
   8 -10  -5    8.33    3.40
   8 -10  -5    3.81    3.42
   7 -10  -5   -1.25    2.73
   7 -10  -5    0.91    2.43
  -7  10   5    1.94    1.25
   6 -10  -5    6.95    2.53
   6 -10  -5    4.28    2.73
  -6  10   5    2.99    1.21
  -6  10   5    1.87    1.97
   5 -10  -5    3.76    1.94
   5 -10  -5    2.77    1.92
  -5  10   5    1.52    1.07
  -5  10   5    0.44    1.33
   4 -10  -5   -0.46    1.20
   4 -10  -5   -0.01    1.22
  -4  10   5   -0.01    0.71
  -4  10   5   -0.12    0.94
   3 -10  -5    0.31    1.17
   3 -10  -5    0.17    1.08
  -3  10   5   -0.10    0.82
  -3  10   5    0.25    0.54
   2 -10  -5    0.43    1.01
   2 -10  -5    1.06    1.22
  -2  10   5    0.33    0.28
  -2  10   5    0.61    0.86
  -2  10   5    0.08    0.41
   1 -10  -5   13.01    1.94
   1 -10  -5   14.52    2.43
  -1  10   5   14.85    1.86
  -1  10   5   14.03    1.08
  -1  10   5   14.74    1.06
   0 -10  -5    0.32    1.08
   0 -10  -5    0.06    1.05
   0  10   5    0.90    0.81
   0  10   5    0.18    0.52
  -1 -10  -5   10.74    1.87
  -1 -10  -5   15.06    2.32
  -1 -10  -5   13.60    1.05
   1  10   5   15.31    1.92
   1  10   5   14.16    1.46
  -2 -10  -5    0.35    0.78
  -2 -10  -5    0.60    1.25
   2  10   5   -0.52    0.65
   2  10   5    0.86    0.73
  -3 -10  -5    1.00    0.75
  -3 -10  -5    1.57    1.43
   3  10   5    1.68    0.95
   3  10   5    1.30    0.71
  -4 -10  -5    1.51    0.83
  -4 -10  -5    2.58    1.73
   4  10   5    1.90    1.05
   4  10   5    2.43    0.74
  -5 -10  -5   16.07    3.05
   5  10   5   17.01    2.32
  -6 -10  -5    0.22    2.59
   6  10   5    0.02    1.36
   6  10   5    0.83    2.04
  -7 -10  -5   -0.85    3.25
   7  10   5    2.14    1.80
   7  10   5    0.62    2.64
  -8 -10  -5   -6.89    3.88
   8  10   5    2.01    2.04
   8  10   5   -1.02    3.24
   9  10   5    3.61    2.23
   9  10   5   -4.53    3.55
   8 -11  -5    0.01    3.47
   8 -11  -5    5.42    2.99
   7 -11  -5    0.98    3.09
   7 -11  -5    3.56    2.59
  -7  11   5    1.25    1.31
  -7  11   5   -5.43    2.41
   6 -11  -5   -0.95    2.73
   6 -11  -5    1.84    1.96
  -6  11   5   -3.77    1.89
  -6  11   5    0.06    1.31
   5 -11  -5    3.77    1.76
   5 -11  -5    1.97    2.19
  -5  11   5   -0.47    1.24
   4 -11  -5   -1.09    1.29
   4 -11  -5    2.37    1.38
  -4  11   5   -0.38    1.15
  -4  11   5    1.35    1.06
   3 -11  -5    2.77    1.35
   3 -11  -5    3.07    1.55
  -3  11   5    1.80    0.75
  -3  11   5    1.41    1.11
   2 -11  -5   -0.62    1.12
   2 -11  -5    2.09    1.32
  -2  11   5    1.09    0.58
  -2  11   5    0.81    0.91
   1 -11  -5    6.47    1.62
   1 -11  -5    5.84    1.65
  -1  11   5    8.05    0.98
  -1  11   5    7.00    1.02
  -1  11   5    6.46    1.24
   0 -11  -5   -0.27    1.18
   0 -11  -5    0.59    1.16
   0  11   5    0.46    0.94
   0  11   5    0.29    0.55
  -1 -11  -5    1.10    1.11
  -1 -11  -5   -0.31    1.32
  -1 -11  -5    0.15    0.41
   1  11   5   -0.01    0.83
   1  11   5    0.42    0.70
  -2 -11  -5    1.05    1.39
  -2 -11  -5    1.64    1.01
  -2 -11  -5    1.80    0.51
   2  11   5    1.23    0.91
   2  11   5    2.15    0.92
  -3 -11  -5    2.27    1.88
  -3 -11  -5    1.28    0.91
   3  11   5    1.72    0.83
   3  11   5    1.20    1.00
  -4 -11  -5    1.19    0.90
  -4 -11  -5    1.57    2.08
   4  11   5    2.11    1.28
   4  11   5    1.67    0.76
  -5 -11  -5   -0.10    2.64
  -5 -11  -5    1.63    1.00
   5  11   5    2.60    1.48
  -6 -11  -5   -1.30    3.14
   6  11   5    0.69    1.64
  -7 -11  -5   -4.74    3.84
   7  11   5   -0.84    2.78
   7  11   5    1.83    2.10
  -8 -11  -5   -6.29    4.37
   8  11   5    2.84    2.22
   8  11   5   -2.08    3.28
  -9 -11  -5   -9.65    4.98
   7 -12  -5    7.19    2.96
   7 -12  -5    3.95    3.54
  -7  12   5    1.33    1.66
  -7  12   5   -5.48    2.39
   6 -12  -5    6.32    2.49
   6 -12  -5    3.65    3.14
  -6  12   5    0.25    2.17
  -6  12   5    1.86    1.76
   5 -12  -5    0.95    2.60
   5 -12  -5    1.49    1.49
  -5  12   5   -1.04    1.60
  -5  12   5    0.02    1.53
   4 -12  -5    3.15    1.47
   4 -12  -5    4.75    2.40
  -4  12   5    2.19    1.56
  -4  12   5    1.09    1.16
   3 -12  -5    1.25    1.82
   3 -12  -5    0.47    1.12
  -3  12   5    0.93    1.31
  -3  12   5   -0.40    0.72
   2 -12  -5    1.11    1.26
   2 -12  -5    0.48    1.53
  -2  12   5   -0.43    1.07
  -2  12   5    0.47    0.54
   1 -12  -5   -0.16    1.22
   1 -12  -5    0.02    1.45
  -1  12   5    0.49    0.53
  -1  12   5    0.80    0.42
  -1  12   5    0.64    1.10
   0 -12  -5   13.09    1.96
   0 -12  -5   17.39    2.71
   0  12   5   17.37    1.58
   0  12   5   16.27    1.89
  -1 -12  -5    7.55    1.07
  -1 -12  -5    8.03    1.65
  -1 -12  -5    8.81    2.35
   1  12   5    8.55    1.26
   1  12   5    8.58    1.52
  -2 -12  -5    0.45    1.03
  -2 -12  -5   -0.38    1.73
   2  12   5   -0.71    0.97
   2  12   5    0.67    0.91
  -3 -12  -5    4.13    2.24
  -3 -12  -5    3.98    1.31
   3  12   5    6.07    1.49
   3  12   5    4.79    1.17
  -4 -12  -5    8.98    3.14
  -4 -12  -5    5.74    1.49
   4  12   5    6.41    1.75
   4  12   5    4.89    1.05
  -5 -12  -5   -2.06    3.01
  -5 -12  -5    2.74    1.26
   5  12   5    1.51    1.74
  -6 -12  -5   -3.75    3.75
   6  12   5    4.71    2.12
  -7 -12  -5   -3.00    4.47
   8  12   5    3.78    2.38
   8  12   5   -6.71    3.37
   7 -13  -5    1.23    3.30
  -7  13   5   -0.32    1.80
   6 -13  -5    3.16    3.18
  -6  13   5   -0.71    1.95
  -6  13   5   -4.30    2.06
   5 -13  -5    2.23    3.05
  -5  13   5    1.68    1.88
  -5  13   5    0.91    1.80
   4 -13  -5    0.65    2.26
  -4  13   5   -0.60    1.34
  -4  13   5    1.11    1.80
   3 -13  -5    2.70    2.36
   3 -13  -5    2.59    1.30
  -3  13   5    1.88    1.04
  -3  13   5    2.36    1.76
   2 -13  -5    0.18    1.06
   2 -13  -5   -0.04    2.07
  -2  13   5    0.64    1.53
  -2  13   5    1.44    0.65
   1 -13  -5   11.50    1.95
   1 -13  -5   16.61    3.09
  -1  13   5   17.32    1.33
  -1  13   5   14.68    2.19
   0 -13  -5    0.01    1.24
   0 -13  -5    0.29    0.54
   0 -13  -5    2.01    2.04
   0  13   5    1.05    1.37
   0  13   5    0.61    0.63
  -1 -13  -5   -0.34    1.20
  -1 -13  -5    1.21    2.08
   1  13   5    0.62    1.45
   1  13   5    1.32    0.91
  -2 -13  -5    7.73    2.74
  -2 -13  -5    4.32    1.40
   2  13   5    7.37    1.53
   2  13   5    8.83    1.74
  -3 -13  -5    3.97    2.79
  -3 -13  -5    2.23    1.25
   3  13   5    4.27    1.34
   3  13   5    4.36    1.61
  -4 -13  -5    4.06    3.30
  -4 -13  -5    1.60    1.23
   4  13   5    5.63    1.93
   4  13   5    4.07    1.13
  -5 -13  -5   -1.32    3.72
  -5 -13  -5    1.32    1.13
   5  13   5    0.76    1.89
  -6 -13  -5    4.00    1.44
  -6 -13  -5   -2.18    4.54
   6  13   5    0.73    2.16
   7  13   5    4.64    2.27
   6 -14  -5    2.42    3.52
  -6  14   5   -1.65    2.21
  -6  14   5   -3.52    2.32
   5 -14  -5    6.28    3.45
  -5  14   5    3.19    2.06
  -5  14   5    3.09    2.30
   4 -14  -5    0.73    2.93
  -4  14   5   -0.43    1.46
  -4  14   5   -1.41    2.06
   3 -14  -5    3.07    2.76
  -3  14   5   -0.35    1.92
  -3  14   5    2.35    1.03
   2 -14  -5    3.76    2.59
  -2  14   5    1.33    1.96
   1 -14  -5    8.14    3.07
  -1  14   5    6.12    2.12
  -1  14   5   12.23    1.12
   0 -14  -5    8.06    3.01
   0  14   5    7.15    2.26
   0  14   5    5.78    1.05
  -1 -14  -5    3.02    2.92
   1  14   5    0.87    0.98
   1  14   5   -0.87    1.71
  -2 -14  -5    2.68    3.16
   2  14   5    0.69    1.25
   2  14   5    0.00    1.62
  -3 -14  -5    0.86    3.49
   3  14   5    0.28    1.37
   3  14   5    2.40    1.63
  -4 -14  -5   -1.47    3.80
   4  14   5   -0.67    1.02
   4  14   5    2.52    1.96
  -5 -14  -5   -4.46    4.46
   5  14   5    2.23    2.25
  -6 -14  -5   -0.42    4.76
   6  14   5    5.12    2.53
  -7 -14  -5   -7.63    5.01
   7  14   5    4.21    2.55
   5 -15  -5    4.84    3.64
  -5  15   5    0.29    1.99
  -5  15   5   -1.75    2.44
   4 -15  -5   14.67    3.85
  -4  15   5   11.89    3.06
  -4  15   5   15.10    2.72
   3 -15  -5    4.64    3.56
  -3  15   5    3.86    1.22
  -3  15   5    1.54    2.42
   2 -15  -5    2.51    3.31
  -2  15   5    3.02    0.76
  -2  15   5   -1.47    2.32
   1 -15  -5   13.66    3.86
  -1  15   5    7.73    2.58
   0 -15  -5    0.21    3.08
   0  15   5    1.61    2.28
  -1 -15  -5    3.53    3.42
   1  15   5    1.80    1.16
   1  15   5    0.28    2.17
  -2 -15  -5    4.05    3.96
   2  15   5    1.81    1.42
   2  15   5   -0.13    1.94
  -3 -15  -5    7.68    4.49
   3  15   5    2.80    1.87
   3  15   5    5.52    2.05
  -4 -15  -5    0.82    4.93
   4  15   5    2.95    2.21
  -5 -15  -5    2.36    5.25
   5  15   5    4.31    2.45
  -6 -15  -5   -4.67    5.11
   6  15   5    2.89    2.48
   4 -16  -5    1.75    3.35
  -4  16   5   -1.23    2.85
  -4  16   5    4.25    1.79
   3 -16  -5    4.55    3.60
  -3  16   5    1.00    2.61
  -3  16   5    4.18    1.31
   2 -16  -5    7.14    3.73
  -2  16   5   -0.51    2.57
   1 -16  -5    9.15    3.98
  -1  16   5   -0.34    2.71
   0 -16  -5    3.20    3.82
   0  16   5   -1.92    2.40
  -1 -16  -5    9.83    4.41
   1  16   5    4.70    2.55
   1  16   5    5.24    2.09
  -2 -16  -5    5.16    4.52
   2  16   5   -2.90    2.29
   2  16   5    2.41    1.81
  -3 -16  -5    9.78    5.16
   3  16   5    7.81    2.40
   3  16   5    3.40    2.22
  -4 -16  -5    3.67    5.00
   4  16   5    1.12    2.21
  -5 -16  -5   -8.58    5.41
   5  16   5    2.45    2.52
   3 -17  -5    5.20    3.99
  -3  17   5   -3.10    2.96
   2 -17  -5    7.04    3.91
  -2  17   5   -2.46    2.95
   1 -17  -5    9.89    4.35
  -1  17   5   -5.24    2.91
   0 -17  -5    5.88    4.38
   0  17   5    0.55    2.66
  -1 -17  -5   11.66    4.76
   1  17   5   -1.01    2.83
  -2 -17  -5    3.82    4.47
   2  17   5    0.33    2.67
   2  17   5    1.35    1.89
  -3 -17  -5    5.17    5.00
   3  17   5    0.04    2.59
   3  17   5    7.46    2.38
  -4 -17  -5    5.07    5.26
   1 -18  -5   13.21    4.74
  -1  18   5   -6.02    3.01
   0 -18  -5   12.56    4.76
   0  18   5   -3.28    2.71
  -1 -18  -5    7.41    4.73
   1  18   5   -5.36    2.91
  -2 -18  -5    5.13    4.28
   1  13  -6    2.69    3.49
  -1 -13   6    2.26    2.72
   0  13  -6    4.88    3.16
   0 -13   6    0.41    2.75
   0 -13   6    5.47    4.24
  -1  13  -6    2.89    3.71
   1 -13   6    9.81    3.48
   1 -13   6    1.83    2.79
  -2  13  -6   -5.56    2.77
   2 -13   6    5.47    3.01
   2 -13   6    6.55    3.42
   3 -13   6    6.30    3.30
   3 -13   6    2.08    3.09
   3  12  -6    7.73    3.44
  -3 -12   6    1.40    2.46
   2  12  -6   10.04    3.53
  -2 -12   6    3.53    2.57
   1  12  -6    8.85    3.37
   1  12  -6   -4.60    2.06
  -1 -12   6    8.35    3.32
  -1 -12   6    1.92    2.49
   0  12  -6    6.44    3.26
   0  12  -6   -3.70    2.26
   0 -12   6    3.62    2.63
   0 -12   6    9.10    3.05
  -1  12  -6    2.79    3.01
   1 -12   6   -1.12    2.55
   1 -12   6    4.30    2.65
   2 -12   6    5.30    2.77
   2 -12   6    3.24    2.79
  -3  12  -6   -5.21    2.28
   3 -12   6    1.69    2.74
   3 -12   6    4.12    3.16
   4 -12   6    3.38    2.98
   4 -12   6    5.61    3.27
   5 -12   6   -0.64    3.09
   5 -12   6    4.70    3.34
   4  11  -6    3.90    3.27
  -4 -11   6    4.31    2.45
   3  11  -6    8.01    3.52
  -3 -11   6    6.29    2.71
   2  11  -6    5.73    3.29
  -2 -11   6    2.37    2.48
  -2 -11   6    2.78    2.64
   1  11  -6   -1.47    1.70
   1  11  -6    0.37    3.04
  -1 -11   6    1.41    2.22
  -1 -11   6    4.62    2.72
   0  11  -6   -2.61    1.75
   0  11  -6    1.64    2.98
   0 -11   6    2.40    2.31
   0 -11   6    2.35    2.14
  -1  11  -6   -3.37    1.92
  -1  11  -6    1.05    2.58
   1 -11   6    4.72    2.47
   1 -11   6    2.65    2.43
  -2  11  -6    1.67    2.28
  -2  11  -6   -0.64    1.88
   2 -11   6    3.14    2.30
   2 -11   6    2.95    2.39
  -3  11  -6   -2.19    2.10
   3 -11   6    6.55    2.73
   3 -11   6    1.65    2.73
  -4  11  -6   -3.31    2.10
   4 -11   6    6.63    3.08
   4 -11   6    2.61    2.87
  -5  11  -6   -2.96    2.04
   5 -11   6    5.20    3.17
   5 -11   6   -0.48    2.96
   6 -11   6    1.06    3.19
   6 -11   6   -2.40    3.11
   5  10  -6    3.99    3.30
  -5 -10   6    6.22    2.46
   4  10  -6    0.67    3.15
  -4 -10   6    2.67    2.41
   3  10  -6    4.12    3.21
  -3 -10   6    1.85    2.73
  -3 -10   6    4.11    2.26
   2  10  -6   -2.26    2.83
   2  10  -6   -2.45    1.21
  -2 -10   6    1.14    2.31
  -2 -10   6    0.92    1.95
   1  10  -6   -1.27    1.33
   1  10  -6    2.25    2.80
  -1 -10   6    1.48    1.97
  -1 -10   6    2.64    2.07
   0  10  -6    0.80    2.47
   0  10  -6   -1.60    1.33
   0 -10   6    1.94    1.89
   0 -10   6    0.60    1.89
  -1  10  -6    4.73    2.51
  -1  10  -6    2.64    1.67
   1 -10   6    6.29    2.20
   1 -10   6    5.67    2.07
  -2  10  -6   -0.67    1.53
  -2  10  -6   -1.10    1.85
   2 -10   6    2.00    1.76
   2 -10   6    2.28    2.16
  -3  10  -6    0.17    1.54
  -3  10  -6   -1.69    2.13
   3 -10   6    0.80    1.92
   3 -10   6    2.62    2.26
  -4  10  -6   -3.51    1.63
   4 -10   6   -0.88    2.40
   4 -10   6    1.90    2.51
  -5  10  -6   -2.58    1.88
   5 -10   6   -0.26    2.84
   5 -10   6    0.22    2.68
  -6  10  -6   -4.18    1.98
   6 -10   6    2.37    3.35
   6 -10   6    0.06    2.73
   7 -10   6    0.25    3.45
   6   9  -6    5.84    3.10
  -6  -9   6    4.23    2.76
   5   9  -6    7.05    3.28
  -5  -9   6    2.90    2.31
   4   9  -6    8.50    3.27
  -4  -9   6    2.85    3.03
  -4  -9   6    8.26    2.43
   3   9  -6    4.25    3.02
   3   9  -6    1.52    0.96
  -3  -9   6    6.31    2.23
  -3  -9   6    3.96    2.48
   2   9  -6   -0.47    2.36
   2   9  -6    1.31    1.08
  -2  -9   6    0.75    1.75
  -2  -9   6   -0.16    1.75
   1   9  -6   -0.20    1.06
   1   9  -6    1.19    2.28
  -1  -9   6    0.94    1.54
  -1  -9   6    1.80    1.66
   0   9  -6   -1.44    2.12
   0   9  -6   -0.24    1.10
   0  -9   6    0.56    1.49
   0  -9   6    1.87    1.54
  -1   9  -6   -0.01    1.91
  -1   9  -6   -0.14    1.14
   1  -9   6    1.42    1.43
   1  -9   6    2.08    1.67
  -2   9  -6   -0.33    1.54
  -2   9  -6    1.48    1.26
   2  -9   6   -0.14    1.62
   2  -9   6    2.32    1.45
  -3   9  -6    4.94    1.67
  -3   9  -6    7.19    1.77
   3  -9   6    7.84    2.27
   3  -9   6    7.72    2.30
  -4   9  -6   -1.08    1.30
   4  -9   6   -0.51    1.90
   4  -9   6    1.06    1.91
  -5   9  -6   -0.13    1.52
   5  -9   6    3.33    2.60
   5  -9   6    1.10    2.41
   6  -9   6    0.09    2.72
   6  -9   6   -0.94    2.78
   7  -9   6    1.24    3.29
   6   8  -6    4.40    3.03
  -6  -8   6    9.85    2.92
   5   8  -6    0.38    2.71
  -5  -8   6    3.83    2.44
  -5  -8   6   -2.32    2.81
   4   8  -6    3.29    2.70
  -4  -8   6   -0.53    2.22
  -4  -8   6    3.93    2.17
   3   8  -6   -0.20    0.66
   3   8  -6    0.08    2.44
  -3  -8   6    0.88    1.94
  -3  -8   6    2.02    1.79
   2   8  -6    1.24    0.85
   2   8  -6    3.01    2.22
  -2  -8   6    2.73    1.84
  -2  -8   6    1.39    1.44
   1   8  -6    0.38    1.98
   1   8  -6    0.34    0.83
  -1  -8   6   -0.08    1.23
  -1  -8   6    1.67    1.39
   0   8  -6    1.36    1.86
   0   8  -6    0.67    0.86
   0  -8   6    0.76    1.22
   0  -8   6    0.96    1.23
  -1   8  -6   -0.04    1.55
  -1   8  -6   -0.49    0.79
   1  -8   6    0.18    1.16
   1  -8   6    1.09    1.24
  -2   8  -6    0.90    1.48
  -2   8  -6    0.14    0.76
   2  -8   6   -0.27    1.22
   2  -8   6    1.01    1.24
  -3   8  -6    0.74    0.95
  -3   8  -6    1.84    1.39
   3  -8   6    0.46    1.37
   3  -8   6    2.17    1.52
  -4   8  -6    0.96    1.18
  -4   8  -6   -0.79    1.12
   4  -8   6    2.15    1.78
   4  -8   6    1.63    1.66
  -5   8  -6   -1.13    1.15
   5  -8   6    2.01    2.03
   5  -8   6    0.17    1.95
  -6   8  -6    0.40    1.45
   6  -8   6    3.34    2.58
   6  -8   6    1.96    2.56
  -7   8  -6   -2.84    1.37
   7  -8   6    0.50    3.17
   8  -8   6    1.48    3.36
   7   7  -6    7.70    2.98
  -7  -7   6    3.72    2.73
   6   7  -6    3.77    2.86
  -6  -7   6   -5.14    3.33
  -6  -7   6    3.14    2.51
   5   7  -6    5.99    2.87
  -5  -7   6    6.32    2.53
  -5  -7   6    1.21    2.32
   4   7  -6    2.92    2.28
  -4  -7   6    3.66    1.85
  -4  -7   6   -0.64    1.78
   3   7  -6    3.57    0.83
   3   7  -6    3.74    2.30
  -3  -7   6    5.40    1.71
  -3  -7   6    2.74    1.75
   2   7  -6    0.50    1.81
   2   7  -6    0.39    0.59
  -2  -7   6    1.92    1.25
  -2  -7   6    0.37    1.40
   1   7  -6    1.23    0.66
   1   7  -6    0.23    1.62
  -1  -7   6    0.34    1.03
  -1  -7   6    0.70    1.18
   0   7  -6   -0.13    1.39
   0   7  -6   -0.06    0.58
   0  -7   6    0.19    0.91
   0  -7   6    0.21    1.07
  -1   7  -6    0.27    1.31
  -1   7  -6   -0.38    0.53
   1  -7   6   -0.60    0.94
   1  -7   6    0.00    0.86
  -2   7  -6    2.03    0.78
  -2   7  -6    2.31    1.33
   2  -7   6    2.39    1.11
   2  -7   6    2.63    1.25
  -3   7  -6   -0.22    0.63
  -3   7  -6   -0.58    1.07
   3  -7   6    0.65    1.09
   3  -7   6    0.89    1.10
  -4   7  -6    0.30    0.76
  -4   7  -6   -0.15    1.04
   4  -7   6    0.99    1.27
   4  -7   6    0.78    1.39
  -5   7  -6   -0.34    0.85
   5  -7   6   -2.44    1.32
   5  -7   6   -0.05    1.75
  -6   7  -6    3.14    1.27
   6  -7   6    3.20    2.24
   6  -7   6    3.77    2.43
  -7   7  -6    0.38    1.27
   7  -7   6   -0.77    2.72
  -8   7  -6    0.46    1.47
   8  -7   6    5.09    3.55
   7   6  -6    6.97    3.03
  -7  -6   6    5.93    2.91
   6   6  -6    2.66    2.57
  -6  -6   6    2.22    2.25
  -6  -6   6   -3.18    2.27
   5   6  -6    5.04    2.46
   5   6  -6    2.36    1.83
  -5  -6   6    0.66    1.83
  -5  -6   6    5.85    2.14
   4   6  -6    1.86    2.14
   4   6  -6    1.42    1.75
  -4  -6   6   -0.94    1.47
  -4  -6   6   -0.37    1.35
   3   6  -6    3.20    1.92
   3   6  -6    2.30    0.63
  -3  -6   6    1.86    1.47
  -3  -6   6    3.65    1.34
   2   6  -6    0.30    0.50
   2   6  -6    1.04    1.50
  -2  -6   6   -1.05    1.15
  -2  -6   6    0.27    0.97
   1   6  -6   -0.15    0.47
   1   6  -6   -0.41    1.28
  -1  -6   6    0.93    1.17
  -1  -6   6    0.41    0.88
   0   6  -6    0.20    0.56
   0   6  -6    0.83    1.28
   0  -6   6    0.15    1.05
   0  -6   6    0.34    0.80
  -1   6  -6    0.05    0.44
  -1   6  -6    0.52    1.20
   1  -6   6    0.32    0.78
   1  -6   6    0.08    0.98
  -2   6  -6    1.73    0.68
  -2   6  -6    2.61    1.22
   2  -6   6    2.33    1.03
   2  -6   6    2.38    0.99
  -3   6  -6    2.58    0.74
  -3   6  -6    1.17    0.99
   3  -6   6    4.07    1.19
   3  -6   6    2.34    1.13
  -4   6  -6    0.63    0.62
  -4   6  -6   -0.29    0.81
   4  -6   6    0.12    1.06
   4  -6   6    0.81    1.08
  -5   6  -6   -0.64    0.79
  -5   6  -6    0.17    0.70
   5  -6   6    0.59    1.44
   5  -6   6    0.64    1.38
  -6   6  -6    3.91    1.11
   6  -6   6    3.79    1.91
   6  -6   6    7.19    2.42
  -7   6  -6    2.27    1.11
   7  -6   6    6.24    2.76
  -8   6  -6    5.08    1.64
   8  -6   6    1.39    3.09
  -9   6  -6    3.05    1.85
   9  -6   6    0.87    3.54
   8   5  -6    2.33    3.00
   8   5  -6    4.79    2.58
  -8  -5   6    3.58    2.99
   7   5  -6    0.96    2.40
   7   5  -6    4.00    2.67
  -7  -5   6    4.79    2.81
   6   5  -6    0.03    1.62
   6   5  -6    3.16    2.40
  -6  -5   6    3.53    2.22
  -6  -5   6   -3.42    1.68
   5   5  -6    1.19    2.09
   5   5  -6    0.38    1.16
  -5  -5   6    0.52    1.63
  -5  -5   6   -1.51    1.35
   4   5  -6    2.14    0.53
   4   5  -6    4.48    1.94
   4   5  -6    2.62    1.09
  -4  -5   6    1.74    1.39
  -4  -5   6    3.38    1.44
   3   5  -6    7.96    1.87
   3   5  -6    6.02    1.21
  -3  -5   6    8.95    1.62
  -3  -5   6    6.83    1.61
   2   5  -6    2.75    0.86
   2   5  -6    3.44    0.65
   2   5  -6    3.72    1.44
  -2  -5   6    4.25    1.17
  -2  -5   6    4.90    1.50
   1   5  -6    2.46    1.26
   1   5  -6    0.72    0.56
  -1  -5   6    0.62    0.86
  -1  -5   6    0.76    1.08
  -1  -5   6    0.85    0.50
   0   5  -6    0.18    1.12
   0  -5   6   -0.43    0.70
   0  -5   6    0.59    0.89
   0  -5   6    0.51    0.46
  -1   5  -6   -0.34    0.40
  -1   5  -6    1.06    0.98
   1  -5   6    0.18    0.84
   1  -5   6   -0.38    0.74
  -2   5  -6    0.05    0.44
  -2   5  -6    1.45    0.89
   2  -5   6    0.52    0.89
   2  -5   6   -0.32    0.69
  -3   5  -6    0.52    0.73
  -3   5  -6    0.24    0.44
   3  -5   6    0.70    0.86
   3  -5   6    0.44    0.91
  -4   5  -6   56.98    2.52
  -4   5  -6   59.51    2.51
   4  -5   6   64.02    3.29
   4  -5   6   62.71    3.45
   4  -5   6   58.66    3.08
  -5   5  -6    2.44    0.83
  -5   5  -6    3.01    0.81
   5  -5   6    2.94    0.96
   5  -5   6    3.55    1.47
   5  -5   6    3.44    1.38
  -6   5  -6    2.67    0.83
   6  -5   6    4.29    2.05
   6  -5   6    2.42    1.17
   6  -5   6    4.12    1.61
  -7   5  -6    0.98    0.76
   7  -5   6    1.14    2.32
  -8   5  -6    4.61    1.68
   8  -5   6   -1.27    2.75
  -9   5  -6    0.74    1.83
   9  -5   6   -3.67    3.33
   8   4  -6    4.29    2.21
   8   4  -6    0.74    2.87
  -8  -4   6   -8.16    3.83
  -8  -4   6    1.03    3.02
   7   4  -6    0.66    2.26
   7   4  -6    0.34    2.13
  -7  -4   6    0.85    2.57
  -7  -4   6   -3.66    2.07
   6   4  -6    3.34    1.83
   6   4  -6    4.66    2.18
  -6  -4   6    2.80    2.14
  -6  -4   6   -0.63    1.49
   5   4  -6    1.11    1.79
   5   4  -6    0.21    1.25
  -5  -4   6   -1.38    1.09
  -5  -4   6    1.28    1.52
   4   4  -6    1.19    0.31
   4   4  -6   -0.60    1.34
   4   4  -6    0.33    0.98
  -4  -4   6    0.42    1.07
  -4  -4   6    0.36    1.11
   3   4  -6    0.12    1.36
   3   4  -6    0.44    0.87
  -3  -4   6    0.62    1.13
  -3  -4   6   -0.13    0.33
  -3  -4   6   -0.28    0.89
   2   4  -6    2.77    1.23
   2   4  -6    2.62    0.91
  -2  -4   6    2.86    1.17
  -2  -4   6    1.77    0.49
  -2  -4   6    1.73    0.94
   1   4  -6    0.81    0.97
   1   4  -6    0.66    0.67
  -1  -4   6   -0.18    0.75
  -1  -4   6    0.82    1.00
  -1  -4   6    0.18    0.39
   0   4  -6    1.83    1.00
   0  -4   6    2.21    0.98
   0  -4   6    1.69    0.87
   0  -4   6    2.30    0.56
  -1   4  -6   14.03    1.70
   1  -4   6   11.84    1.60
   1  -4   6   10.97    1.11
   1  -4   6   10.64    1.51
  -2   4  -6   17.46    1.60
   2  -4   6   18.46    1.72
   2  -4   6   17.29    1.35
   2  -4   6   19.74    1.78
  -3   4  -6    3.99    0.73
  -3   4  -6    5.02    0.74
  -3   4  -6    4.86    0.89
   3  -4   6    5.64    1.11
   3  -4   6    4.96    1.08
  -4   4  -6    2.46    0.64
  -4   4  -6    4.70    0.87
   4  -4   6    3.80    1.16
   4  -4   6    3.53    0.83
   4  -4   6    3.54    1.02
  -5   4  -6    7.30    0.99
  -5   4  -6    6.45    0.97
   5  -4   6    5.28    1.06
   5  -4   6    5.86    1.28
   5  -4   6    7.35    1.61
  -6   4  -6    0.27    0.60
  -6   4  -6    0.06    0.43
   6  -4   6    0.51    1.14
   6  -4   6    0.69    1.33
   6  -4   6   -0.08    0.73
  -7   4  -6    1.51    0.65
  -7   4  -6    5.40    1.21
   7  -4   6    1.89    1.23
   7  -4   6    3.26    2.32
  -8   4  -6    3.18    1.47
   8  -4   6    0.36    2.71
   8  -4   6    1.25    1.63
  -9   4  -6    1.16    2.01
   9  -4   6   -0.58    2.19
   9  -4   6   -2.63    3.15
 -10   4  -6   -5.02    2.30
   8   3  -6    2.77    2.85
   8   3  -6    3.60    1.96
  -8  -3   6    3.18    3.05
   7   3  -6    1.10    2.26
   7   3  -6    2.47    1.94
  -7  -3   6    0.46    2.45
  -7  -3   6   -2.17    1.80
   6   3  -6    0.05    1.68
   6   3  -6    1.95    1.81
  -6  -3   6    1.37    1.87
  -6  -3   6   -0.50    1.33
   5   3  -6    0.12    1.21
   5   3  -6    1.13    1.56
  -5  -3   6   -0.63    0.91
  -5  -3   6    1.06    1.32
   4   3  -6    4.15    1.59
   4   3  -6    4.34    1.33
  -4  -3   6    3.64    0.51
  -4  -3   6    4.13    1.28
  -4  -3   6    3.07    1.11
   3   3  -6   17.95    2.66
   3   3  -6   17.96    2.15
  -3  -3   6   17.76    2.08
  -3  -3   6   16.83    1.08
  -3  -3   6   18.14    2.13
   2   3  -6    5.59    1.17
   2   3  -6    5.31    1.26
  -2  -3   6    4.69    1.10
  -2  -3   6    6.99    0.83
  -2  -3   6    6.75    1.28
   1   3  -6   14.37    1.61
   1   3  -6   18.21    2.04
  -1  -3   6   16.78    1.87
  -1  -3   6   15.92    1.72
  -1  -3   6   16.21    1.11
   0   3  -6    0.78    0.73
   0   3  -6    1.77    0.80
   0  -3   6    0.41    0.66
   0  -3   6    1.12    0.73
   0  -3   6    1.15    0.41
  -1   3  -6    0.99    0.62
  -1   3  -6    1.15    0.73
   1  -3   6    1.30    0.64
   1  -3   6    1.06    0.67
   1  -3   6    0.79    0.41
  -2   3  -6    2.02    0.65
  -2   3  -6    1.79    0.59
   2  -3   6    1.55    0.76
   2  -3   6    1.18    0.48
   2  -3   6    1.62    0.75
  -3   3  -6   12.96    1.21
  -3   3  -6   14.10    1.18
   3  -3   6   14.98    1.23
   3  -3   6   13.62    1.58
   3  -3   6   12.97    1.52
  -4   3  -6    1.00    0.55
   4  -3   6    1.49    0.92
   4  -3   6    0.49    0.55
   4  -3   6    0.18    0.62
   4  -3   6    1.31    0.82
  -5   3  -6    0.33    0.41
  -5   3  -6    0.60    0.54
   5  -3   6    0.58    0.73
   5  -3   6    0.37    0.77
   5  -3   6    0.44    0.96
  -6   3  -6   -0.02    0.40
  -6   3  -6    1.37    0.52
   6  -3   6    0.02    0.79
   6  -3   6    0.62    1.04
   6  -3   6    0.90    1.31
  -7   3  -6    2.26    1.02
  -7   3  -6    0.79    0.49
   7  -3   6    1.06    1.28
   7  -3   6    2.29    1.97
  -8   3  -6    0.18    1.18
   8  -3   6    1.40    2.67
   8  -3   6   -0.90    1.58
  -9   3  -6    6.64    2.25
   9  -3   6    4.15    3.45
   9  -3   6    5.87    2.64
  10  -3   6    0.41    3.07
  10  -3   6   -4.37    3.45
   9   2  -6    2.22    3.26
  -9  -2   6   -8.27    4.72
  -9  -2   6   -2.69    3.44
   8   2  -6    3.73    1.87
   8   2  -6    3.74    2.90
  -8  -2   6    1.16    3.17
  -8  -2   6   -4.45    2.24
   7   2  -6    2.84    2.43
   7   2  -6    3.09    1.69
  -7  -2   6    2.03    2.60
  -7  -2   6   -1.20    1.40
   6   2  -6    1.18    1.85
   6   2  -6   -0.26    1.33
  -6  -2   6    0.12    1.08
  -6  -2   6    1.91    1.92
   5   2  -6    1.78    1.35
   5   2  -6    2.35    1.53
  -5  -2   6    1.67    1.26
  -5  -2   6    0.41    0.82
   4   2  -6    8.94    1.61
   4   2  -6    8.19    1.65
  -4  -2   6    8.58    1.51
  -4  -2   6    7.91    1.25
  -4  -2   6   10.01    0.81
   3   2  -6    0.07    0.97
   3   2  -6    0.98    1.04
  -3  -2   6    0.46    0.83
  -3  -2   6    0.19    0.78
  -3  -2   6   -0.28    0.26
   2   2  -6    3.67    1.08
   2   2  -6    4.87    1.12
  -2  -2   6    4.58    0.93
  -2  -2   6    3.42    0.99
  -2  -2   6    3.77    0.56
   1   2  -6    5.41    1.00
   1   2  -6    5.07    1.05
  -1  -2   6    6.52    0.82
  -1  -2   6    4.35    0.95
  -1  -2   6    7.00    1.00
   0   2  -6   22.35    1.59
   0   2  -6   23.00    1.78
   0  -2   6   23.15    1.37
   0  -2   6   20.67    1.15
   0  -2   6   22.57    1.60
  -1   2  -6   18.12    1.46
  -1   2  -6   16.66    1.29
   1  -2   6   16.72    1.08
   1  -2   6   17.31    1.39
   1  -2   6   17.13    1.18
  -2   2  -6    2.11    0.57
  -2   2  -6    1.56    0.51
   2  -2   6    1.83    0.59
   2  -2   6    2.28    0.51
   2  -2   6    2.08    0.66
  -3   2  -6    1.18    0.52
   3  -2   6    1.85    0.74
   3  -2   6    1.36    0.66
   3  -2   6    1.99    0.52
  -4   2  -6    0.56    0.49
   4  -2   6    2.49    0.85
   4  -2   6    1.01    0.71
   4  -2   6    1.41    0.69
   4  -2   6    0.95    0.50
  -5   2  -6   -0.04    0.28
   5  -2   6    0.42    0.44
   5  -2   6   -0.13    0.88
   5  -2   6    0.44    0.72
   5  -2   6   -0.26    0.67
  -6   2  -6    7.35    0.95
   6  -2   6    4.70    0.74
   6  -2   6    7.86    1.68
   6  -2   6    6.56    1.42
  -7   2  -6    1.40    0.46
  -7   2  -6    2.46    0.95
   7  -2   6    1.43    1.42
   7  -2   6    2.29    1.89
   7  -2   6    2.16    0.62
  -8   2  -6    0.71    1.20
   8  -2   6    0.81    1.68
   8  -2   6    2.40    2.50
  -9   2  -6   -1.56    1.62
   9  -2   6   -3.21    2.95
   9  -2   6    0.79    2.49
   9   1  -6    3.27    3.35
  -9  -1   6   -3.98    3.47
   8   1  -6    9.02    3.30
  -8  -1   6    0.94    3.27
  -8  -1   6   -1.66    2.18
   7   1  -6    1.01    1.20
   7   1  -6    4.53    2.40
  -7  -1   6    0.98    2.53
  -7  -1   6   -0.55    1.27
   6   1  -6    2.16    1.81
   6   1  -6    1.15    1.18
  -6  -1   6   -0.58    0.82
  -6  -1   6    0.85    1.68
   5   1  -6    1.17    1.15
   5   1  -6    0.50    1.27
  -5  -1   6    1.81    1.23
  -5  -1   6    0.05    0.67
   4   1  -6    0.29    1.14
   4   1  -6    2.07    1.13
  -4  -1   6    0.59    0.31
  -4  -1   6    0.29    0.91
  -4  -1   6    0.71    0.67
   3   1  -6    3.57    1.11
   3   1  -6    3.27    1.23
  -3  -1   6    3.14    0.47
  -3  -1   6    3.34    0.74
  -3  -1   6    3.17    0.99
   2   1  -6   22.80    1.84
   2   1  -6   20.99    2.09
  -2  -1   6   23.45    1.87
  -2  -1   6   21.65    1.11
  -2  -1   6   21.59    1.49
   1   1  -6    5.95    1.12
   1   1  -6    8.15    1.19
  -1  -1   6    6.07    0.99
  -1  -1   6    7.34    1.07
  -1  -1   6    7.88    0.78
   0   1  -6    3.89    0.91
   0   1  -6    3.88    0.68
   0  -1   6    4.04    0.55
   0  -1   6    3.73    0.53
   0  -1   6    3.36    0.68
  -1   1  -6   19.92    1.46
  -1   1  -6   18.50    1.21
   1  -1   6   18.80    1.37
   1  -1   6   17.59    1.05
   1  -1   6   18.45    0.99
  -2   1  -6   37.52    1.59
  -2   1  -6   38.47    1.73
   2  -1   6   40.25    1.74
   2  -1   6   40.23    1.65
   2  -1   6   38.79    1.52
   3  -1   6    4.08    0.79
   3  -1   6    3.23    0.55
   3  -1   6    4.36    0.84
   3  -1   6    3.95    0.73
   3  -1   6    2.88    0.54
   4  -1   6    1.37    0.46
   4  -1   6    0.97    0.76
   4  -1   6    1.80    0.66
   4  -1   6    1.57    0.80
   4  -1   6    1.39    0.51
   5  -1   6    0.49    0.72
   5  -1   6    0.65    0.50
   5  -1   6    0.06    0.79
   5  -1   6    0.07    0.42
   5  -1   6    1.18    0.88
  -6   1  -6    0.44    0.31
  -6   1  -6    0.62    0.44
   6  -1   6    0.16    0.44
   6  -1   6    0.41    0.97
   6  -1   6    0.62    1.13
  -7   1  -6    0.23    0.33
  -7   1  -6   -0.17    0.54
   7  -1   6   -0.51    1.12
   7  -1   6   -0.76    1.58
   7  -1   6   -0.50    0.48
  -8   1  -6   -1.03    0.83
   8  -1   6   -1.80    1.74
   8  -1   6    0.84    2.27
   9   0  -6    4.56    3.22
  -9   0   6   -0.27    3.59
  -9   0   6   -3.64    2.73
   8   0  -6    0.29    2.81
  -8   0   6    2.72    3.13
  -8   0   6   -0.68    2.06
   7   0  -6    1.13    1.04
   7   0  -6    2.21    2.42
  -7   0   6   -1.06    1.00
  -7   0   6    1.85    2.20
   6   0  -6    0.87    1.83
   6   0  -6    0.09    0.97
  -6   0   6    0.01    1.42
  -6   0   6   -0.38    0.70
   5   0  -6    7.16    1.89
   5   0  -6    7.89    1.39
  -5   0   6    7.94    0.79
  -5   0   6    7.51    1.47
  -5   0   6    6.18    1.08
   4   0  -6   -0.32    0.84
   4   0  -6   -0.10    1.10
  -4   0   6    0.11    0.49
  -4   0   6    0.50    0.85
  -4   0   6    0.44    0.30
   3   0  -6    9.08    1.57
   3   0  -6    8.10    1.21
  -3   0   6   10.73    1.07
  -3   0   6   11.46    0.85
  -3   0   6   10.68    1.63
   2   0  -6   53.90    2.30
   2   0  -6   56.90    2.96
  -2   0   6   54.51    1.65
  -2   0   6   53.23    1.78
  -2   0   6   53.43    2.33
   1   0  -6   19.19    1.94
   1   0  -6   20.61    1.38
  -1   0   6   21.00    1.50
  -1   0   6   19.68    1.03
   0   0  -6    0.43    0.71
   0   0  -6    0.09    0.37
   0   0   6   -0.29    0.43
   0   0   6   -0.01    0.24
  -1   0  -6    3.00    0.72
  -1   0  -6    2.94    0.55
   1   0   6    3.18    0.47
   1   0   6    3.07    0.58
   1   0   6    3.62    0.49
  -2   0  -6    5.82    0.87
   2   0   6    5.85    0.69
   2   0   6    5.98    0.72
   2   0   6    5.03    0.74
   3   0   6    0.43    0.31
   3   0   6    0.84    0.46
   3   0   6    0.42    0.47
   3   0   6    0.60    0.52
   3   0   6    0.31    0.34
   4   0   6    2.08    0.49
   4   0   6    3.05    0.84
   4   0   6    2.42    0.55
   4   0   6    2.72    0.85
   4   0   6    2.54    0.69
   5   0   6    0.67    0.48
   5   0   6    0.48    0.78
   5   0   6   -0.02    0.82
   5   0   6    0.25    0.40
   5   0   6   -0.43    0.56
  -6   0  -6   -0.32    0.34
   6   0   6    0.23    0.96
   6   0   6   -0.41    0.41
   6   0   6    0.57    1.09
   6   0   6    0.22    0.43
  -7   0  -6    2.07    0.77
  -7   0  -6    2.31    0.45
   7   0   6    3.95    1.81
   7   0   6    2.65    0.73
   7   0   6    3.03    1.60
   8   0   6    0.15    1.76
   9   0   6   -1.18    2.65
 -10   0  -6    8.58    1.90
  10   0   6    1.38    3.10
   9  -1  -6    3.87    3.38
  -9   1   6   -5.20    3.39
  -9   1   6    1.95    2.58
   8  -1  -6    1.14    2.99
  -8   1   6    1.03    1.63
  -8   1   6   -2.00    2.90
   7  -1  -6    1.73    2.39
  -7   1   6    1.60    1.14
  -7   1   6    3.01    2.25
   6  -1  -6    2.98    1.05
   6  -1  -6    4.31    2.05
  -6   1   6    5.21    1.63
  -6   1   6    3.27    0.99
   5  -1  -6    4.68    1.09
   5  -1  -6    4.08    1.70
  -5   1   6    4.50    0.89
  -5   1   6    4.00    1.20
  -5   1   6    5.35    0.66
   4  -1  -6   22.00    2.73
   4  -1  -6   23.12    1.95
  -4   1   6   21.75    1.43
  -4   1   6   21.42    1.08
  -4   1   6   20.27    1.97
   3  -1  -6    4.63    0.90
   3  -1  -6    4.60    1.34
  -3   1   6    5.79    0.78
  -3   1   6    5.51    0.72
  -3   1   6    4.66    0.95
   2  -1  -6    5.17    1.21
   2  -1  -6    4.87    0.77
  -2   1   6    5.75    0.61
  -2   1   6    5.59    0.67
  -2   1   6    5.25    0.92
   1  -1  -6    6.33    1.16
   1  -1  -6    7.11    0.88
  -1   1   6    7.05    0.69
  -1   1   6    8.42    1.10
   0  -1  -6    0.14    0.33
   0  -1  -6    0.52    0.65
   0   1   6   -0.08    0.42
   0   1   6   -0.20    0.22
  -1  -1  -6   19.19    1.48
   1   1   6   18.38    0.98
   1   1   6   18.59    1.08
   1   1   6   18.64    1.01
  -2  -1  -6   45.06    1.95
   2   1   6   42.51    1.49
   2   1   6   44.81    1.54
   2   1   6   44.22    1.49
   3   1   6    0.26    0.37
   3   1   6    0.26    0.29
   3   1   6   -0.11    0.49
   3   1   6    0.17    0.38
   3   1   6    0.04    0.50
   4   1   6   17.72    1.26
   4   1   6   18.76    1.74
   4   1   6   19.10    1.76
   4   1   6   17.36    1.07
   4   1   6   17.68    1.20
  -5  -1  -6    1.66    0.47
   5   1   6    1.36    0.55
   5   1   6    1.24    0.44
   5   1   6    1.90    0.94
   5   1   6    2.17    0.97
  -6  -1  -6   23.57    1.89
  -6  -1  -6   23.21    1.43
   6   1   6   23.36    1.28
   6   1   6   21.82    1.52
   6   1   6   20.67    2.49
  -7  -1  -6    0.61    0.53
  -7  -1  -6    0.05    0.72
   7   1   6    0.38    1.34
   7   1   6   -0.50    0.50
  -8  -1  -6    5.82    1.54
  -8  -1  -6    2.62    1.01
   8   1   6    3.20    2.12
   8   1   6    2.74    0.85
  -9  -1  -6   -1.31    1.12
  -9  -1  -6    2.55    1.73
   9   1   6    1.11    2.53
 -10  -1  -6   11.17    2.55
  10   1   6    0.63    3.29
   9  -2  -6    4.93    3.10
  -9   2   6   -5.27    3.48
  -9   2   6    4.88    1.89
   8  -2  -6    1.65    2.86
  -8   2   6    2.75    1.40
  -8   2   6   -2.83    2.93
   7  -2  -6    1.83    2.36
  -7   2   6    1.51    2.13
  -7   2   6    3.24    1.05
   6  -2  -6   10.86    2.55
   6  -2  -6   11.65    1.71
  -6   2   6   11.68    2.03
  -6   2   6   15.91    1.76
   5  -2  -6    0.54    0.74
   5  -2  -6   -0.46    1.27
  -5   2   6    0.89    0.44
  -5   2   6    1.08    0.96
  -5   2   6    0.20    0.31
   4  -2  -6   -0.59    0.98
   4  -2  -6   -0.09    0.64
   4  -2  -6   -0.24    0.67
  -4   2   6    0.19    0.31
  -4   2   6   -0.10    0.73
   3  -2  -6    4.59    0.78
   3  -2  -6    5.02    0.89
   3  -2  -6    4.24    1.32
  -3   2   6    4.45    0.93
  -3   2   6    4.59    0.60
   2  -2  -6    0.56    0.39
   2  -2  -6    0.60    0.90
   2  -2  -6    0.50    0.45
  -2   2   6    0.15    0.30
  -2   2   6    0.97    0.56
   1  -2  -6    0.61    0.76
   1  -2  -6    0.18    0.32
  -1   2   6   -0.06    0.27
  -1   2   6    0.35    0.48
   0  -2  -6    0.93    0.35
   0  -2  -6    1.65    0.75
   0   2   6    1.54    0.37
   0   2   6    1.85    0.49
  -1  -2  -6   29.43    1.75
   1   2   6   29.01    1.19
   1   2   6   29.90    1.22
   1   2   6   29.76    1.20
  -2  -2  -6   18.90    1.37
  -2  -2  -6   17.71    0.93
   2   2   6   17.99    1.02
   2   2   6   17.38    0.90
   2   2   6   17.69    0.96
  -3  -2  -6    0.25    0.33
   3   2   6    1.09    0.62
   3   2   6    0.91    0.33
   3   2   6    0.81    0.34
   3   2   6    0.77    0.41
  -4  -2  -6    6.02    0.94
   4   2   6    7.30    0.93
   4   2   6    6.21    1.12
   4   2   6    7.60    0.95
   4   2   6    6.40    0.79
  -5  -2  -6   15.48    0.99
  -5  -2  -6   14.28    1.43
   5   2   6   14.76    1.01
   5   2   6   14.07    1.31
   5   2   6   16.14    2.02
  -6  -2  -6    0.72    0.78
  -6  -2  -6    0.55    0.45
   6   2   6    1.05    0.65
   6   2   6    0.10    0.37
   6   2   6    0.42    0.99
  -7  -2  -6    3.89    0.79
  -7  -2  -6    4.39    1.26
   7   2   6    4.35    0.97
   7   2   6    5.62    1.74
  -8  -2  -6   -0.40    0.68
  -8  -2  -6    2.54    1.57
   8   2   6   -0.45    1.90
   8   2   6    0.33    0.75
  -9  -2  -6    1.64    1.95
  -9  -2  -6    0.54    1.19
   9   2   6    2.42    1.05
   9   2   6    2.25    2.77
 -10  -2  -6    5.65    2.69
  10   2   6    0.05    2.91
   9  -3  -6    3.64    3.08
  -9   3   6   -1.94    3.61
   8  -3  -6    2.13    2.96
  -8   3   6    0.41    3.07
   7  -3  -6    1.47    2.17
  -7   3   6    0.32    2.12
   6  -3  -6   -0.44    0.99
   6  -3  -6    0.59    1.64
  -6   3   6    0.54    1.31
   5  -3  -6    1.39    1.34
   5  -3  -6    1.77    0.98
   5  -3  -6    1.92    0.74
  -5   3   6    1.94    1.01
  -5   3   6    1.21    0.44
   4  -3  -6    6.01    1.48
   4  -3  -6    6.47    0.93
   4  -3  -6    6.89    1.12
  -4   3   6    7.73    1.18
  -4   3   6    8.20    0.90
   3  -3  -6    1.44    0.60
   3  -3  -6    0.80    0.58
   3  -3  -6    0.99    1.15
  -3   3   6    1.23    0.42
  -3   3   6    0.71    0.67
   2  -3  -6    0.70    0.39
   2  -3  -6   -0.04    0.38
   2  -3  -6    0.44    0.87
  -2   3   6    0.13    0.32
  -2   3   6    0.61    0.49
   1  -3  -6    0.09    0.29
   1  -3  -6    0.03    0.28
   1  -3  -6    0.37    0.78
  -1   3   6    0.00    0.29
  -1   3   6    0.13    0.44
   0  -3  -6    1.33    0.71
   0  -3  -6    0.92    0.29
   0   3   6    1.26    0.42
   0   3   6    1.06    0.35
   0   3   6    1.01    0.38
  -1  -3  -6   21.68    1.56
  -1  -3  -6   19.78    0.99
   1   3   6   20.78    1.05
   1   3   6   20.53    0.92
   1   3   6   20.22    1.04
  -2  -3  -6   10.03    0.90
  -2  -3  -6    9.92    1.11
   2   3   6    9.99    0.61
   2   3   6   10.11    0.83
   2   3   6    9.73    0.84
  -3  -3  -6   18.88    1.23
   3   3   6   20.00    1.02
   3   3   6   21.55    1.67
   3   3   6   18.82    1.17
   3   3   6   19.70    0.90
  -4  -3  -6    1.63    0.34
  -4  -3  -6    2.01    0.64
   4   3   6    1.73    0.61
   4   3   6    1.63    0.38
   4   3   6    1.53    0.81
  -5  -3  -6    9.23    0.80
  -5  -3  -6    8.82    1.33
   5   3   6    8.13    1.17
   5   3   6    7.59    1.44
   5   3   6    8.88    0.84
  -6  -3  -6    1.22    0.77
  -6  -3  -6    0.95    0.49
   6   3   6    0.33    0.36
   6   3   6    1.03    1.10
   6   3   6    0.80    0.67
  -7  -3  -6    7.11    1.58
  -7  -3  -6    6.56    0.95
   7   3   6    5.28    1.78
   7   3   6    8.00    1.26
  -8  -3  -6    1.74    0.82
  -8  -3  -6    2.57    1.72
   8   3   6    1.79    1.96
   8   3   6    3.53    1.15
  -9  -3  -6    3.69    2.46
   9   3   6    4.29    1.35
   9   3   6    4.01    3.00
 -10  -3  -6   -1.93    2.63
  10   3   6    0.28    2.94
   8  -4  -6    3.93    2.84
  -8   4   6   -2.69    2.78
   7  -4  -6    7.24    2.63
   7  -4  -6    5.05    2.12
  -7   4   6    4.91    2.40
   6  -4  -6    1.71    1.79
   6  -4  -6    0.11    1.07
  -6   4   6    0.82    1.36
   5  -4  -6    1.96    0.98
   5  -4  -6    1.51    0.68
   5  -4  -6    0.95    1.41
  -5   4   6    2.06    1.01
  -5   4   6    1.39    0.48
   4  -4  -6   -0.52    0.98
   4  -4  -6   -0.04    0.65
   4  -4  -6    0.18    0.55
  -4   4   6   -0.05    0.40
  -4   4   6    0.61    0.71
   3  -4  -6    0.00    0.56
   3  -4  -6    0.24    1.01
   3  -4  -6    0.78    0.49
  -3   4   6    0.70    0.43
  -3   4   6    1.20    0.66
   2  -4  -6    2.26    0.46
   2  -4  -6    2.43    0.59
   2  -4  -6    1.94    0.99
  -2   4   6    2.03    0.47
  -2   4   6    2.39    0.63
   1  -4  -6   96.33    2.51
   1  -4  -6   97.68    2.27
   1  -4  -6   94.48    3.67
  -1   4   6   93.76    2.36
  -1   4   6   90.18    2.37
   0  -4  -6    0.09    0.34
   0  -4  -6    0.46    0.61
   0   4   6   -0.07    0.31
   0   4   6   -0.01    0.24
   0   4   6   -0.07    0.29
  -1  -4  -6    0.59    0.44
  -1  -4  -6    0.56    0.52
   1   4   6    0.21    0.31
   1   4   6    0.06    0.30
  -2  -4  -6   34.52    1.64
  -2  -4  -6   35.72    1.93
   2   4   6   36.01    1.43
   2   4   6   37.93    1.54
  -3  -4  -6   25.06    1.57
   3   4   6   24.22    1.16
   3   4   6   25.46    1.45
  -4  -4  -6   14.14    1.48
   4   4   6   13.07    1.23
   4   4   6   13.14    0.90
   4   4   6   12.92    1.79
  -5  -4  -6    0.67    0.40
  -5  -4  -6    0.07    0.63
   5   4   6    0.65    0.61
   5   4   6    0.41    0.84
   5   4   6    0.33    0.33
  -6  -4  -6   46.18    2.89
  -6  -4  -6   47.18    1.82
   6   4   6   44.28    3.39
   6   4   6   50.87    2.52
   6   4   6   47.16    1.48
  -7  -4  -6    1.64    1.20
  -7  -4  -6    0.88    0.68
   7   4   6    1.82    0.98
   7   4   6    1.53    1.51
  -8  -4  -6    0.39    1.70
   8   4   6    0.57    1.00
   8   4   6   -0.51    1.74
  -9  -4  -6   -2.34    2.21
   9   4   6    0.36    1.19
   9   4   6   -0.28    2.40
  10   4   6    0.57    1.90
  10   4   6   -1.19    3.36
   8  -5  -6    2.13    2.85
   8  -5  -6    8.76    3.23
  -8   5   6    0.07    2.96
   7  -5  -6    1.75    2.27
   7  -5  -6    0.04    1.91
  -7   5   6   -1.56    1.95
   6  -5  -6    2.77    2.02
   6  -5  -6    0.37    1.11
  -6   5   6    0.21    0.40
  -6   5   6   -1.08    1.11
   5  -5  -6    0.29    0.87
   5  -5  -6   -0.65    1.30
  -5   5   6   -0.03    0.80
  -5   5   6    0.16    0.43
   4  -5  -6    2.13    0.88
   4  -5  -6    2.14    1.31
   4  -5  -6    2.57    0.60
  -4   5   6    2.00    0.58
  -4   5   6    2.34    0.81
   3  -5  -6    4.93    0.63
   3  -5  -6    4.92    0.96
   3  -5  -6    4.44    1.41
  -3   5   6    5.25    0.71
  -3   5   6    4.97    0.83
   2  -5  -6    2.78    1.10
   2  -5  -6    2.69    0.69
   2  -5  -6    2.37    0.43
  -2   5   6    2.79    0.60
  -2   5   6    2.98    0.62
   1  -5  -6    8.47    1.38
   1  -5  -6    8.14    1.01
  -1   5   6    9.18    0.66
  -1   5   6    8.24    0.89
  -1   5   6    9.16    0.85
   0  -5  -6   23.86    1.95
   0  -5  -6   23.64    1.40
   0   5   6   23.94    1.03
   0   5   6   25.04    1.25
   0   5   6   23.70    1.04
  -1  -5  -6   10.77    1.41
  -1  -5  -6   10.93    1.24
   1   5   6   10.59    0.89
   1   5   6   10.28    0.92
  -2  -5  -6    1.08    0.62
  -2  -5  -6    0.78    0.52
   2   5   6    0.50    0.40
   2   5   6    0.64    0.36
  -3  -5  -6   40.68    2.18
  -3  -5  -6   41.18    2.12
   3   5   6   41.46    1.83
   3   5   6   41.06    1.56
  -4  -5  -6   76.26    3.06
   4   5   6   76.15    2.08
   4   5   6   76.37    2.70
   4   5   6   76.34    3.41
  -5  -5  -6    0.04    0.77
   5   5   6   -0.08    0.63
   5   5   6    0.42    0.84
   5   5   6   -0.09    0.34
  -6  -5  -6    6.14    1.52
  -6  -5  -6    4.27    0.76
   6   5   6    5.48    1.09
   6   5   6    4.85    1.41
  -7  -5  -6    1.84    1.46
   7   5   6   -0.79    1.46
   7   5   6    2.03    1.02
  -8  -5  -6   -1.49    1.81
   8   5   6    1.66    1.15
   8   5   6    1.01    2.08
  -9  -5  -6   -2.48    2.69
   9   5   6   -2.02    2.48
   9   5   6    1.13    1.46
 -10  -5  -6   -5.56    3.18
  10   5   6    0.40    3.10
  10   5   6    3.12    1.75
   9  -6  -6    0.87    3.14
   9  -6  -6   -0.51    3.44
   8  -6  -6    2.16    3.05
   8  -6  -6    4.90    3.18
  -8   6   6   -2.12    2.98
   7  -6  -6    0.27    2.15
   7  -6  -6   -0.43    1.97
  -7   6   6    1.96    2.17
   6  -6  -6    0.87    1.97
   6  -6  -6    0.34    1.31
  -6   6   6   -0.46    1.21
  -6   6   6    0.78    0.51
   5  -6  -6    0.62    1.47
   5  -6  -6    1.07    1.06
  -5   6   6    0.88    0.95
  -5   6   6    1.15    0.55
   4  -6  -6   25.42    3.20
   4  -6  -6   26.25    2.23
  -4   6   6   24.26    1.97
  -4   6   6   26.02    1.65
   3  -6  -6    9.05    1.80
   3  -6  -6   11.84    1.51
   3  -6  -6   11.61    0.86
  -3   6   6   11.89    1.34
  -3   6   6   11.81    1.30
   2  -6  -6   11.08    0.73
   2  -6  -6    9.49    1.60
   2  -6  -6   11.24    1.36
  -2   6   6   12.01    1.08
  -2   6   6   12.73    1.22
   1  -6  -6    9.65    1.24
   1  -6  -6    7.70    1.43
  -1   6   6    9.64    0.86
  -1   6   6    9.39    1.07
  -1   6   6    9.44    0.68
   0  -6  -6    2.14    0.85
   0  -6  -6    1.64    0.68
   0   6   6    1.01    0.33
   0   6   6    0.81    0.47
   0   6   6    1.37    0.37
  -1  -6  -6   20.03    1.64
  -1  -6  -6   19.44    1.75
   1   6   6   18.38    1.15
   1   6   6   19.04    1.18
  -2  -6  -6   29.71    1.95
  -2  -6  -6   29.28    1.97
   2   6   6   28.66    1.41
   2   6   6   28.24    1.47
  -3  -6  -6    6.72    1.19
  -3  -6  -6    6.61    1.12
   3   6   6    5.97    0.89
   3   6   6    5.79    0.72
  -4  -6  -6    1.88    0.96
   4   6   6    0.88    0.84
   4   6   6    1.55    0.51
   4   6   6    1.88    0.76
  -5  -6  -6   29.33    2.53
   5   6   6   30.45    2.15
   5   6   6   27.85    2.77
   5   6   6   27.59    1.29
  -6  -6  -6   14.28    2.22
   6   6   6   13.77    1.86
   6   6   6    8.89    1.84
  -7  -6  -6   -1.58    1.37
   7   6   6    1.73    1.14
   7   6   6   -0.98    1.46
  -8  -6  -6   -2.45    2.15
   8   6   6    1.47    1.41
   8   6   6   -1.84    2.25
  -9  -6  -6   -4.16    2.84
   9   6   6    0.62    1.49
   9   6   6   -1.04    3.03
 -10  -6  -6   -7.84    3.51
  10   6   6   -0.15    1.73
  10   6   6   -1.77    3.44
   9  -7  -6   -2.26    3.50
   9  -7  -6    3.56    3.45
   8  -7  -6    4.04    2.96
   8  -7  -6   -2.17    3.05
  -8   7   6   -4.35    2.75
   7  -7  -6    0.92    2.27
   7  -7  -6    4.11    2.73
   6  -7  -6    3.17    1.79
   6  -7  -6    1.73    2.09
  -6   7   6    1.48    0.63
  -6   7   6    0.12    1.50
   5  -7  -6    0.58    1.05
   5  -7  -6    0.09    1.46
  -5   7   6    0.63    1.00
  -5   7   6   -0.13    0.54
   4  -7  -6   22.44    3.46
   4  -7  -6   21.62    2.18
  -4   7   6   22.26    1.94
  -4   7   6   22.57    1.70
   3  -7  -6   19.79    1.90
   3  -7  -6   18.88    0.89
   3  -7  -6   19.70    2.93
  -3   7   6   19.51    1.62
  -3   7   6   20.77    1.55
   2  -7  -6    2.31    1.22
   2  -7  -6    1.25    0.79
  -2   7   6    1.09    0.62
  -2   7   6    1.22    0.49
   1  -7  -6    1.26    1.06
   1  -7  -6    0.43    0.68
  -1   7   6    0.70    0.34
  -1   7   6    0.88    0.32
  -1   7   6    0.93    0.56
   0  -7  -6    0.81    0.71
   0  -7  -6    1.79    0.90
   0   7   6    0.65    0.51
   0   7   6    0.61    0.38
   0   7   6    0.95    0.31
  -1  -7  -6    1.71    0.90
  -1  -7  -6    1.97    0.78
   1   7   6    2.35    0.61
   1   7   6    1.87    0.55
  -2  -7  -6    4.99    0.98
  -2  -7  -6    4.88    1.19
   2   7   6    5.46    0.84
   2   7   6    5.12    0.73
  -3  -7  -6   19.75    1.78
  -3  -7  -6   19.44    2.13
   3   7   6   18.87    1.60
   3   7   6   19.79    1.37
  -4  -7  -6    8.39    1.53
   4   7   6   10.08    1.12
   4   7   6    8.10    1.40
   4   7   6    8.38    1.15
  -5  -7  -6    0.57    1.08
   5   7   6    0.03    1.11
   5   7   6    0.90    0.42
   5   7   6    0.03    0.79
  -6  -7  -6    1.33    1.39
   6   7   6    0.16    0.85
   6   7   6    0.38    1.35
  -7  -7  -6   -1.56    1.77
   7   7   6    0.88    1.14
   7   7   6   -0.02    1.70
  -8  -7  -6   -0.44    2.41
   8   7   6   -0.10    1.33
   8   7   6   -1.82    2.25
  -9  -7  -6   -5.35    3.06
   9   7   6    2.08    3.06
   9   7   6    3.05    1.95
  10   7   6    1.97    1.85
  10   7   6   -1.55    3.21
   8  -8  -6   -0.41    3.06
   8  -8  -6    2.05    3.20
   7  -8  -6    7.16    3.03
   7  -8  -6   10.18    3.32
  -7   8   6    4.97    2.69
   6  -8  -6   21.48    3.66
   6  -8  -6   20.58    3.18
  -6   8   6   27.92    3.37
  -6   8   6   19.34    1.89
   5  -8  -6    0.84    1.29
   5  -8  -6    2.10    1.70
  -5   8   6    0.43    1.07
  -5   8   6    1.10    0.71
   4  -8  -6   13.40    2.12
   4  -8  -6   10.77    2.28
  -4   8   6    9.38    1.34
  -4   8   6   11.62    1.67
   3  -8  -6    1.91    1.40
   3  -8  -6    2.77    0.98
  -3   8   6    2.67    0.78
  -3   8   6    3.89    0.81
   2  -8  -6   -0.09    0.73
   2  -8  -6    0.98    1.24
  -2   8   6    0.23    0.61
  -2   8   6    0.27    0.25
  -2   8   6    0.53    0.46
   1  -8  -6    0.21    0.76
   1  -8  -6    1.22    1.21
  -1   8   6    0.28    0.37
  -1   8   6    0.28    0.57
  -1   8   6    0.32    0.30
   0  -8  -6   84.49    3.82
   0  -8  -6   83.69    3.42
   0   8   6   86.72    2.71
   0   8   6   84.65    2.35
   0   8   6   82.68    2.03
  -1  -8  -6   20.56    2.11
  -1  -8  -6   21.09    2.31
   1   8   6   21.67    1.42
   1   8   6   23.35    1.58
  -2  -8  -6    8.73    1.49
  -2  -8  -6    8.02    1.52
   2   8   6    5.90    0.83
   2   8   6    5.82    0.94
  -3  -8  -6    4.41    1.35
  -3  -8  -6    2.46    0.82
   3   8   6    4.04    0.75
   3   8   6    3.69    0.91
  -4  -8  -6    5.81    1.55
  -4  -8  -6    4.41    1.05
   4   8   6    5.76    1.08
   4   8   6    5.47    0.77
  -5  -8  -6   10.13    1.99
   5   8   6    8.95    1.39
   5   8   6   11.66    1.12
   5   8   6    9.64    1.80
  -6  -8  -6    0.08    1.62
   6   8   6    1.26    1.08
   6   8   6    0.83    1.72
  -7  -8  -6    0.64    2.22
   7   8   6    0.59    1.33
   7   8   6   -0.94    1.99
  -8  -8  -6   -2.86    3.09
   8   8   6    0.31    2.82
   8   8   6    2.41    1.82
  -9  -8  -6   -4.24    3.50
   9   8   6    4.43    2.05
   9   8   6    1.60    3.53
   8  -9  -6    6.92    3.53
   8  -9  -6   11.24    3.59
  -8   9   6    1.56    3.19
   7  -9  -6    2.37    2.87
   7  -9  -6    5.27    3.16
  -7   9   6   -4.79    2.20
   6  -9  -6    1.77    2.29
   6  -9  -6    1.08    2.03
  -6   9   6   -0.37    0.73
  -6   9   6    1.50    1.87
   5  -9  -6   -0.76    1.75
   5  -9  -6   -0.60    1.30
  -5   9   6    0.49    1.28
  -5   9   6    0.32    0.86
   4  -9  -6    0.44    1.07
   4  -9  -6    1.01    1.58
  -4   9   6   -0.08    0.76
  -4   9   6    0.18    0.72
   3  -9  -6   -0.06    0.84
   3  -9  -6    0.20    1.30
  -3   9   6    0.87    0.56
  -3   9   6    0.59    0.70
   2  -9  -6   21.66    2.18
   2  -9  -6   21.70    3.04
  -2   9   6   21.69    1.41
  -2   9   6   23.46    1.96
  -2   9   6   19.99    0.88
   1  -9  -6   17.82    2.73
   1  -9  -6   18.00    2.17
  -1   9   6   19.10    1.17
  -1   9   6   18.75    1.78
  -1   9   6   18.57    1.05
   0  -9  -6    0.04    1.06
   0  -9  -6   -0.01    0.95
   0   9   6    0.24    0.63
   0   9   6    0.16    0.27
   0   9   6   -0.41    0.39
  -1  -9  -6    0.32    1.09
  -1  -9  -6    0.77    0.97
   1   9   6    0.40    0.66
   1   9   6    0.45    0.58
  -2  -9  -6   -0.17    1.06
  -2  -9  -6    0.66    0.74
   2   9   6    0.06    0.65
   2   9   6    0.21    0.61
  -3  -9  -6    0.84    1.28
  -3  -9  -6    0.42    0.67
   3   9   6    0.36    0.63
   3   9   6    0.34    0.68
  -4  -9  -6    2.96    1.53
  -4  -9  -6    1.76    0.88
   4   9   6    1.81    0.92
   4   9   6    1.83    0.64
  -5  -9  -6    3.11    1.79
   5   9   6    2.28    1.04
   5   9   6    1.79    1.56
  -6  -9  -6    0.85    2.04
   6   9   6    0.08    1.17
   6   9   6    0.47    1.80
  -7  -9  -6   -2.01    2.77
   7   9   6   -0.22    1.37
   7   9   6   -1.26    2.31
  -8  -9  -6   -1.62    3.47
   8   9   6    1.56    3.18
   8   9   6    1.98    1.88
  -9  -9  -6   -5.72    3.90
   9   9   6   -1.43    3.17
   9   9   6    3.75    2.18
   8 -10  -6    0.34    3.28
   8 -10  -6    6.85    3.34
   7 -10  -6    6.72    3.33
   7 -10  -6    8.66    3.23
  -7  10   6    0.59    2.72
   6 -10  -6    4.86    2.68
   6 -10  -6    2.41    2.54
  -6  10   6   -0.01    0.99
  -6  10   6   -2.65    1.81
   5 -10  -6    4.50    2.25
   5 -10  -6    5.91    2.30
  -5  10   6    3.03    1.17
  -5  10   6    3.30    1.69
   4 -10  -6    6.62    1.88
   4 -10  -6    6.19    2.18
  -4  10   6    5.94    1.32
  -4  10   6    6.08    1.28
   3 -10  -6    9.47    2.10
   3 -10  -6    7.96    1.71
  -3  10   6    8.07    1.18
  -3  10   6    7.51    1.25
   2 -10  -6    0.03    0.92
   2 -10  -6    0.22    1.34
  -2  10   6    0.20    0.27
  -2  10   6    0.31    0.43
  -2  10   6    0.42    0.78
   1 -10  -6    8.90    1.84
   1 -10  -6    6.64    1.50
  -1  10   6    5.33    0.99
  -1  10   6    8.29    0.96
  -1  10   6    7.74    0.91
   0 -10  -6   39.18    3.10
   0 -10  -6   42.41    3.09
   0  10   6   38.41    1.50
   0  10   6   39.45    2.23
   0  10   6   40.89    1.82
  -1 -10  -6    1.03    1.25
  -1 -10  -6    1.21    1.10
   1  10   6    1.11    0.76
   1  10   6    1.12    0.67
  -2 -10  -6    2.55    1.08
  -2 -10  -6    1.22    1.27
   2  10   6    2.13    0.80
   2  10   6    1.35    0.78
  -3 -10  -6    0.26    1.36
  -3 -10  -6   -0.48    0.67
   3  10   6   -0.23    0.63
   3  10   6    0.41    0.84
  -4 -10  -6    2.47    1.70
  -4 -10  -6    3.25    1.09
   4  10   6    2.00    1.02
   4  10   6    2.81    0.76
  -5 -10  -6    1.24    1.91
  -5 -10  -6    2.41    1.06
   5  10   6    2.37    1.30
   5  10   6    1.24    0.59
  -6 -10  -6   11.91    3.36
   6  10   6   12.41    2.78
   6  10   6   14.51    2.20
  -7 -10  -6   -1.40    3.22
   7  10   6    4.71    1.90
   7  10   6    2.28    2.68
  -8 -10  -6   -1.74    4.01
   8  10   6    1.66    2.04
   8  10   6   -0.89    3.40
  -9 -10  -6   -9.78    4.39
   9  10   6    3.53    2.20
   9  10   6   -4.28    3.57
   8 -11  -6    1.18    3.43
   8 -11  -6    8.83    3.38
   7 -11  -6    3.39    3.27
   7 -11  -6    4.99    3.06
   6 -11  -6    0.59    2.80
   6 -11  -6    4.04    2.54
  -6  11   6   -0.19    1.21
  -6  11   6   -4.37    2.16
   5 -11  -6    0.60    1.91
   5 -11  -6    2.71    2.17
  -5  11   6    0.02    1.18
  -5  11   6   -1.63    1.31
   4 -11  -6    1.00    1.57
   4 -11  -6    1.47    1.62
  -4  11   6   -0.12    0.95
  -4  11   6    0.50    1.17
   3 -11  -6    0.85    1.35
   3 -11  -6    0.57    1.42
  -3  11   6    1.22    1.05
  -3  11   6    0.34    0.55
   2 -11  -6    7.15    1.91
   2 -11  -6    8.81    1.89
  -2  11   6    8.16    1.42
  -2  11   6    6.85    0.99
   1 -11  -6    4.49    1.51
   1 -11  -6    5.34    1.72
  -1  11   6    3.61    0.69
  -1  11   6    3.78    1.12
  -1  11   6    3.74    0.65
   0 -11  -6    1.73    1.29
   0 -11  -6    1.24    1.30
   0  11   6    1.74    0.88
   0  11   6    1.53    0.66
   0  11   6    1.19    0.38
  -1 -11  -6    1.43    1.21
  -1 -11  -6    1.08    1.41
   1  11   6    2.18    0.96
   1  11   6    1.31    0.36
   1  11   6    1.84    0.78
  -2 -11  -6    2.64    1.59
  -2 -11  -6    2.75    1.22
   2  11   6    3.17    0.97
   2  11   6    2.54    0.98
  -3 -11  -6    2.95    1.90
  -3 -11  -6    2.52    1.13
   3  11   6    2.91    0.92
   3  11   6    3.48    1.14
  -4 -11  -6    8.19    2.45
  -4 -11  -6    7.69    1.65
   4  11   6    6.85    1.08
   4  11   6    8.38    1.68
  -5 -11  -6    1.80    1.17
  -5 -11  -6   -0.98    2.49
   5  11   6    0.53    1.33
  -6 -11  -6   -1.25    2.90
   6  11   6    0.22    1.48
  -7 -11  -6   -3.21    3.90
   7  11   6   -2.38    2.72
   7  11   6    4.48    2.12
  -8 -11  -6   -5.80    4.37
   8  11   6   -0.34    3.37
   8  11   6    2.28    2.24
   7 -12  -6    5.51    2.94
   7 -12  -6   -1.16    3.29
  -7  12   6    1.19    1.55
   6 -12  -6    3.78    2.54
   6 -12  -6   -0.93    2.93
  -6  12   6    0.81    1.66
   5 -12  -6    5.00    2.32
   5 -12  -6    5.85    2.86
  -5  12   6    3.21    1.71
  -5  12   6   -0.30    1.81
   4 -12  -6    2.10    1.67
   4 -12  -6   -0.17    1.82
  -4  12   6    0.07    1.46
  -4  12   6   -0.85    0.94
   3 -12  -6    1.12    1.45
   3 -12  -6    1.16    1.66
  -3  12   6   -0.38    1.28
  -3  12   6   -0.34    0.68
   2 -12  -6   -0.50    1.37
   2 -12  -6    0.10    1.37
  -2  12   6   -0.83    0.40
  -2  12   6    0.12    1.04
   1 -12  -6   22.72    3.25
   1 -12  -6   25.74    3.51
  -1  12   6   22.14    2.45
  -1  12   6   23.11    1.52
  -1  12   6   23.45    1.42
   0 -12  -6    6.18    1.70
   0 -12  -6    7.42    2.08
   0  12   6    6.84    1.00
   0  12   6    5.73    1.32
   0  12   6    6.98    0.86
  -1 -12  -6    7.07    2.14
  -1 -12  -6    4.41    1.57
   1  12   6    4.42    1.26
   1  12   6    5.53    1.10
  -2 -12  -6   13.37    2.07
  -2 -12  -6   17.47    3.02
   2  12   6   17.21    2.00
   2  12   6   18.30    2.35
  -3 -12  -6    2.09    1.31
  -3 -12  -6    1.86    2.06
   3  12   6    3.28    1.31
   3  12   6    3.38    1.10
  -4 -12  -6    1.69    1.23
  -4 -12  -6    1.95    2.53
   4  12   6    2.08    1.45
   4  12   6    2.40    0.94
  -5 -12  -6    2.65    1.54
  -5 -12  -6    3.04    3.16
   5  12   6    2.86    1.66
  -6 -12  -6    6.64    1.94
  -6 -12  -6    2.12    4.05
   6  12   6    4.74    2.12
  -7 -12  -6   -3.09    4.43
   7  12   6    3.23    2.20
  -8 -12  -6   -4.52    4.63
   8  12   6    9.32    2.71
   7 -13  -6   -0.43    3.39
  -7  13   6    0.73    1.87
   6 -13  -6    5.21    2.50
   6 -13  -6    1.09    3.20
  -6  13   6    1.54    1.89
   5 -13  -6    2.15    1.86
   5 -13  -6    2.90    2.98
  -5  13   6    0.92    1.89
  -5  13   6   -2.67    1.80
   4 -13  -6    3.68    2.65
   4 -13  -6    3.36    1.72
  -4  13   6    0.12    1.40
  -4  13   6    2.50    1.93
   3 -13  -6    2.61    2.29
   3 -13  -6    2.11    1.49
  -3  13   6    0.70    0.88
  -3  13   6   -1.28    1.51
   2 -13  -6    0.89    1.95
   2 -13  -6    0.76    1.39
  -2  13   6    1.45    0.65
  -2  13   6    0.59    1.39
   1 -13  -6    9.69    2.58
   1 -13  -6    6.47    1.89
  -1  13   6    8.82    1.84
  -1  13   6    9.25    1.21
   0 -13  -6    0.12    1.78
   0 -13  -6   -1.53    1.27
   0  13   6    0.19    1.20
   0  13   6   -0.01    0.60
  -1 -13  -6    3.15    1.50
  -1 -13  -6    6.97    2.54
   1  13   6    5.34    1.63
   1  13   6    5.24    1.16
  -2 -13  -6   -0.94    1.10
  -2 -13  -6    0.20    2.08
   2  13   6    0.29    1.27
   2  13   6    0.33    0.99
  -3 -13  -6   11.40    2.14
  -3 -13  -6   10.36    3.18
   3  13   6   15.52    2.19
   3  13   6   12.96    1.76
  -4 -13  -6    1.43    3.20
  -4 -13  -6   -0.44    1.19
   4  13   6   -0.08    0.91
   4  13   6    0.41    1.50
  -5 -13  -6    7.59    2.19
  -5 -13  -6    5.58    4.06
   5  13   6   10.33    2.39
  -6 -13  -6    2.78    4.75
  -6 -13  -6    3.70    1.72
   6  13   6    0.17    2.06
  -7 -13  -6   -9.11    4.66
   7  13   6    2.00    2.25
  -8 -13  -6   43.24    2.70
   6 -14  -6   12.00    3.78
  -6  14   6    4.76    2.39
   5 -14  -6    4.91    3.20
  -5  14   6    1.64    2.28
  -5  14   6   -2.72    2.05
   4 -14  -6    3.18    2.81
  -4  14   6    0.45    2.14
  -4  14   6   -0.61    1.53
   3 -14  -6    2.35    2.74
  -3  14   6    0.10    0.87
  -3  14   6   -1.06    1.77
   2 -14  -6    2.59    2.68
  -2  14   6    4.11    2.08
  -2  14   6    2.08    0.77
   1 -14  -6    1.16    2.36
  -1  14   6    1.14    0.49
  -1  14   6    3.20    1.89
   0 -14  -6   10.91    3.26
   0  14   6    4.87    1.01
   0  14   6    5.43    1.91
  -1 -14  -6    4.15    1.88
  -1 -14  -6   13.32    3.57
   1  14   6    8.99    1.46
   1  14   6   10.21    2.19
  -2 -14  -6    2.08    1.57
  -2 -14  -6    6.35    3.31
   2  14   6    7.05    1.62
   2  14   6    6.29    1.95
  -3 -14  -6    2.51    3.64
   3  14   6    1.46    1.46
   3  14   6    1.57    1.36
  -4 -14  -6    3.83    1.83
  -4 -14  -6    7.30    4.00
   4  14   6   10.99    2.30
   4  14   6    7.71    1.53
  -5 -14  -6    1.82    1.73
  -5 -14  -6    0.20    4.68
   5  14   6   -0.33    2.11
  -6 -14  -6    3.01    2.22
  -6 -14  -6   -1.58    5.07
   6  14   6    2.38    2.37
  -7 -14  -6  -10.93    5.27
   7  14   6    2.55    2.41
   5 -15  -6    5.21    3.44
  -5  15   6    5.60    2.65
  -5  15   6    1.14    2.48
   4 -15  -6    6.61    3.57
  -4  15   6    6.27    2.60
   3 -15  -6    3.14    3.27
  -3  15   6    0.98    2.27
  -3  15   6    1.50    1.22
   2 -15  -6   14.11    3.86
  -2  15   6    9.15    1.54
  -2  15   6    6.82    2.49
   1 -15  -6    3.34    3.17
  -1  15   6   -0.59    1.97
   0 -15  -6    4.18    3.15
   0  15   6    0.25    2.04
  -1 -15  -6    1.77    3.16
   1  15   6    0.37    1.91
   1  15   6    3.24    1.13
  -2 -15  -6    1.90    3.85
   2  15   6    3.89    1.54
   2  15   6    1.01    2.06
  -3 -15  -6    2.10    4.12
   3  15   6   -0.23    1.69
   3  15   6   -0.24    1.62
  -4 -15  -6    0.01    4.82
   4  15   6    2.17    1.59
   4  15   6    2.46    2.08
  -5 -15  -6    2.27    5.18
   5  15   6    3.27    2.32
  -6 -15  -6   -6.06    5.04
   6  15   6    2.19    2.38
   4 -16  -6    3.35    3.57
  -4  16   6   -1.77    1.58
  -4  16   6   -1.79    2.64
   3 -16  -6    8.72    3.79
  -3  16   6    1.67    2.52
   2 -16  -6    3.29    3.60
  -2  16   6   -3.50    2.55
   1 -16  -6    8.18    3.92
  -1  16   6    3.22    2.75
   0 -16  -6   13.46    4.53
   0  16   6   10.43    2.77
  -1 -16  -6    6.08    4.05
   1  16   6   -0.83    2.50
  -2 -16  -6   12.28    4.88
   2  16   6    7.85    2.68
[truncated: 346,930 more chars]
